# Supplementary material for: Sympatric chimpanzees and gorillas harbor convergent gut microbial communities
Source: HighWire-hosted journal article supplement (doi:10.1101/gr.154773.113), 2013-06-26
Supplement: Supplemental_Material.zip [file TableS1.docx]

**Table S1: List of samples analyzed for host microbiota**

| **Sample ID** a | | **Collection Site** b | **Species Identity** c | **Gender** d | **Year Collected** | **Sequences per sample** | |
| --- | --- | --- | --- | --- | --- | --- | --- |
| **GMpts7** | | Tanzania, Gombe | *P. t. s.* | female | 2000 | 11544 | |
| **GMpts9** | | Tanzania, Gombe | *P. t. s.* | female | 2000 | 10344 | |
| **GMpts10** | | Tanzania, Gombe | *P. t. s.* | male | 2000 | 12459 | |
| **GMpts11** | | Tanzania, Gombe | *P. t. s.* | female | 2000 | 14090 | |
| **GMpts15** | | Tanzania, Gombe | *P. t. s.* | male | 2000 | 19442 | |
| **GMpts20** | | Tanzania, Gombe | *P. t. s.* | male | 2000 | 10230 | |
| **GMpts41** | | Tanzania, Gombe | *P. t. s.* | female | 2001 | 14178 | |
| **GMpts1435** | | Tanzania, Gombe | *P. t. s.* | female | 2008 | 12806 | |
| **GMpts1436** | | Tanzania, Gombe | *P. t. s.* | male | 2008 | 14023 | |
| **GMpts1437** | | Tanzania, Gombe | *P. t. s.* | male | 2008 | 14462 | |
| **GMpts1438** | | Tanzania, Gombe | *P. t. s.* | female | 2008 | 16650 | |
| **GMpts1440** | | Tanzania, Gombe | *P. t. s.* | female | 2008 | 10740 | |
| **GMpts1442** | | Tanzania, Gombe | *P. t. s.* | female | 2008 | 12980 | |
| **GMpts1446** | | Tanzania, Gombe | *P. t. s.* | male | 2008 | 12858 | |
| **GMpts1448** | | Tanzania, Gombe | *t. t. s.* | female | 2008 | 12274 | |
| **GMpts1455** | | Tanzania, Gombe | *P. t. s.* | female | 2008 | 10823 | |
| **GMpts1457** | | Tanzania, Gombe | *P. t. s.* | male | 2008 | 13633 | |
| **GMpts1459** | | Tanzania, Gombe | *P. t. s.* | female | 2008 | 12134 | |
| **GMpts1467** | | Tanzania, Gombe | *P. t. s.* | female | 2008 | 13140 | |
| **GMpts1468** | | Tanzania, Gombe | *P. t. s.* | female | 2008 | 11178 | |
| **GMpts1474** | | Tanzania, Gombe | *P. t. s.* | female | 2008 | 9521 | |
| **GMpts1476** | | Tanzania, Gombe | *P. t. s.* | female | 2008 | 10342 | |
| **GMpts1480** | | Tanzania, Gombe | *P. t. s.* | female | 2008 | 10924 | |
| **GMpts1482** | | Tanzania, Gombe | *P. t. s.* | female | 2008 | 9799 | |
| **GMpts1485** | | Tanzania, Gombe | *P. t. s.* | male | 2008 | 10332 | |
| **GMpts1494** | | Tanzania, Gombe | *P. t. s.* | male | 2008 | 8381 | |
| **GMpts1496** | | Tanzania, Gombe | *P. t. s.* | male | 2008 | 8764 | |
| **GMpts1497** | | Tanzania, Gombe | *P. t. s.* | female | 2008 | 8896 | |
| **GMpts1500** | | Tanzania, Gombe | *P. t. s.* | male | 2008 | 7571 | |
| **GMpts1501** | | Tanzania, Gombe | *P. t. s.* | male | 2008 | 8389 | |
| **GMpts1502** | | Tanzania, Gombe | *P. t. s.* | male | 2008 | 8665 | |
| **GMpts1504** | | Tanzania, Gombe | *P. t. s.* | male | 2008 | 7746 | |
| **GMpts1507** | | Tanzania, Gombe | *P. t. s.* | male | 2008 | 7898 | |
| **GMpts1509** | | Tanzania, Gombe | *P. t. s.* | female | 2008 | 8886 | |
| **GMpts173** | | Tanzania, Gombe | *P. t. s.* | male | 2002 | 38476 | |
|  | | Cameroon, Boumba Bek | *P. t. t.* |  |  |  | |
| **BBptt089** | | male | 2003 | 36110 | |
| **BBptt095** | | Cameroon, Boumba Bek | *P. t. t.* | female | 2003 | 32915 | |
| **CPptt469** | | Cameroon, Campo Ma'an | *P. t. t.* | unknown | 2004 | 18050 | |
| **CPptt470** | | Cameroon, Campo Ma'an | *P. t. t.* | unknown | 2004 | 58115 | |
| **MTptt334** | | Cameroon, Minta | *P. t. t.* | unknown | 2004 | 10807 | |
| **MTptt348** | | Cameroon, Minta | *P. t. t.* | unknown | 2004 | 19856 | |
|  | | Cameroon, Wassa Emtse | *P. t. e.* |  |  |  | |
| **WEpte457** | | unknown | 2004 | 45324 | |
| **WEpte464*** | | Cameroon, Wassa Emtse | *P. t. e.* | unknown | 2004 | 10028 | |
| **WEpte458** | | Cameroon, Wassa Emtse | *P. t. e.* | unknown | 2004 | 110324 | |
|  | |  |  |  |  |  | |
| **KSGpp0645** | | DRC, Lui-Kotal | *P. p.* | unknown | 2006 | 14151 | |
| **KSGpp0647** | | DRC, Lui-Kotal | *P. p.* | unknown | 2006 | 12369 | |
| **KSGpp0652** | | DRC, Lui-Kotal | *P. p.* | unknown | 2006 | 5545 | |
| **KSGpp0660** | | DRC, Lui-Kotal | *P. p.* | unknown | 2006 | 17605 | |
| **KSGpp0673** | | DRC, Lui-Kotal | *P. p.* | unknown | 2006 | 16853 | |
| **MEggg2528** | | CAR, Melongodi | *G. g. g.* | unknown | 2007 | 12292 | |
| **MEggg2530** | | CAR, Melongodi | *G. g. g.* | unknown | 2007 | 12948 | |
| **EKggg520** | | Cameroon, E'kom | *G. g. g.* | unknown | 2004 | 12769 | |
| **DGggg408** | | Cameroon, Diang | *G. g. g.* | unknown | 2004 | 13118 | |
| **DGggg426** | | Cameroon, Diang | *G. g. g.* | unknown | 2004 | 12506 | |
| **DGggg432** | | Cameroon, Diang | *G. g. g.* | unknown | 2004 | 7175 | |
| **BBggg231** | | Cameroon, Boumba Bek | *G. g. g.* | unknown | 2003 | 11101 | |
| **BBggg232** | | Cameroon, Boumba Bek | *G. g. g.* | unknown | 2003 | 16802 | |
| **LBggg01** | | Cameroon, Lobeke | *G. g. g.* | unknown | 2002 | 10921 | |
| **LBggg03** | | Cameroon, Lobeke | *G. g. g.* | unknown | 2002 | 16794 | |
| **LBggg06** | | Cameroon, Lobeke | *G. g. g.* | unknown | 2002 | 18114 | |
| **LBggg10** | | Cameroon, Lobeke | *G. g. g.* | unknown | 2002 | 13321 | |
| **LBggg13** | | Cameroon, Lobeke | *G. g. g.* | unknown | 2002 | 12450 | |
| **LBggg178** | | Cameroon, Lobeke | *G. g. g.* | unknown | 2003 | 10654 | |
| **LBggg179** | | Cameroon, Lobeke | *G. g. g.* | unknown | 2003 | 10395 | |
|  | | DRC, Lubutu | *G. b. g.* |  |  |  | |
| **LUgbg2555** | | unknown | 2008 | 14690 | |
| **LUgbg2556** | | DRC, Lubutu | *G. b. g.* | unknown | 2008 | 16241 | |
| **OPgbg19091** | | DRC, Opienge | *G. b. g.* | unknown | 2007 | 15849 | |
| **OPgbg19101** | | DRC, Opienge | *G. b. g.* | unknown | 2007 | 16938 | |
| **OPgbg19111** | | DRC, Opienge | *G. b. g.* | unknown | 2007 | 17282 | |
| **OPgbg23462** | | DRC, Opienge | *G. b. g.* | unknown | 2007 | 13825 | |
| **OPgbg24592** | | DRC, Opienge | *G. b. g.* | unknown | 2008 | 13675 | |
| **OPgbg24602** | | DRC, Opienge | *G. b. g.* | unknown | 2008 | 12463 | |
| **OPgbg23453** | | DRC, Opienge | *G. b. g.* | unknown | 2007 | 12280 | |
| **OPgbg23473** | | DRC, Opienge | *G. b. g.* | unknown | 2007 | 12239 | |
| **OPgbg24563** | | DRC, Opienge | *G. b. g.* | unknown | 2008 | 13846 | |
| **KEgbg1471** | | DRC, Kasese | *G. b. g.* | unknown | 2007 | 17372 | |
| **KEgbg1507** | | DRC, Kasese | *G. b. g.* | unknown | 2007 | 9039 | |
| **KEgbg14744** | | DRC, Kasese | *G. b. g.* | unknown | 2007 | 11305 | |
| **KEgbg14754** | | DRC, Kasese | *G. b. g.* | unknown | 2007 | 14391 | |
| **KEgbg25645** | | DRC, Kasese | *G. b. g.* | unknown | 2008 | 15046 | |
| **KEgbg25655** | | DRC, Kasese | *G. b. g.* | unknown | 2008 | 14160 | |
| **KEgbg25815** | | DRC, Kasese | *G. b. g.* | unknown | 2008 | 14245 | |
| **KEgbg22636** | | DRC, Kasese | *G. b. g.* | unknown | 2007 | 11343 | |
| **KEgbg22656** | | DRC, Kasese | *G. b. g.* | unknown | 2007 | 13870 | |
| **KEgbg2268** | | DRC, Kasese | *G. b. g.* | unknown | 2007 | 17187 | |
|  | |  |  |  |  |  | |
| a Each numbered superscript (1 ­through 6) designates an individual from which multiple samples were analyzed. For chimpanzees from Gombe, Tanzania (GMpts samples), each sample comes from a unique individual, as confirmed by microsatellite analysis (Keele *et al.* 2009). Remaining samples were typed to host species, but not to individuals. In the case of WEpte464*, the sample was recovered in north of the Sanaga River in Cameroon indicating its status as *P. t. ellioti*; however, the host was typed as *P. t. troglodytes* based on mtDNA.  b Designations indicate country of origin, followed by field site.  c Species/subspecies designations are as follows: *P. t. s., Pan troglodytes schweinfurthii*; *P. t. t.*, *Pan troglodytes troglodytes*; *P. t. e., Pan troglodytes ellioti*; *G. g. g.*, *Gorilla gorilla gorilla*; *G. b. g., Gorilla beringei graueri.*  d Gender determined by field observation or presence/absence of a Y-chromosome marker (Keele *et al.* 2009). | | | | | | |
|  |  | | | | | | | |

**References**

1. Keele, B. F., Jones, J. H., Terio, K. A., Esters, J. D., Rudicell, R. S., et al. (2009) Increased mortality and AIDS-like immunopathology in wild chimpanzees infected with SIVcpz. Nature 460: 515-519.
