# Supplementary material for: Sympatric chimpanzees and gorillas harbor convergent gut microbial communities
Source: HighWire-hosted journal article supplement (doi:10.1101/gr.154773.113), 2013-06-26
Supplement: Supplemental_Material.zip [file TableS2.xlsx]

## Sheet: Sheet1
#OTU ID	DG408	DG426	DG432	EK520	LB01	LB03	LB06	LB10	LB13	LB178	LB179	BB231	BB232	ME2528	ME2530	MT334	MT348	WE457	WE458	WE464	CP469	CP470	BB089	BB095	taxonomy
62907	0	0	0	0	0	0	0	0	0	1	1	0	0	1	0	0	0	3	2	0	0	0	43	0	Bacteria;Proteobacteria;Betaproteobacteria;Burkholderiales
2666	1	4	0	0	0	0	0	0	0	0	0	2	0	0	0	0	0	25	21	0	0	0	1	0	Bacteria;Bacteroidetes;Sphingobacteria;Sphingobacteriales;Sphingobacteriaceae
28589	0	0	0	2	0	0	0	0	0	0	0	0	0	0	0	0	0	51	6	0	0	0	0	0	Bacteria;Firmicutes;Bacilli;Bacillales;Bacillaceae
10095	0	0	0	0	0	0	0	0	0	3	57	0	0	0	0	0	0	0	0	0	0	0	1	0	Bacteria
39569	0	0	0	0	0	1	1	1	0	0	0	0	0	0	0	2	0	12	1	0	1	7	11	25	Bacteria;Firmicutes;Clostridia;Clostridiales;Veillonellaceae
27119	0	0	0	0	0	0	0	0	0	0	0	1	0	20	0	0	0	0	0	0	0	0	43	0	Bacteria;Actinobacteria;Actinobacteria;Actinomycetales
52910	0	1	0	4	0	0	0	0	0	0	0	0	0	6	7	0	0	12	30	0	0	0	4	0	Bacteria;Firmicutes;Bacilli;Bacillales;Paenibacillaceae;Paenibacillus
62613	0	0	0	0	0	0	0	0	0	46	17	0	0	0	0	0	0	0	1	0	0	0	3	0	Bacteria;Bacteroidetes;Sphingobacteria;Sphingobacteriales;Sphingobacteriaceae;Pedobacter
18945	5	0	0	0	0	0	0	0	0	0	0	8	0	0	0	0	0	0	0	0	0	0	54	0	Bacteria;Bacteroidetes;Sphingobacteria;Sphingobacteriales;Sphingobacteriaceae;Sphingobacterium
52150	0	0	0	0	0	0	0	0	0	1	4	0	0	1	1	0	0	3	32	0	0	0	25	0	Bacteria;Proteobacteria;Betaproteobacteria;Burkholderiales;Burkholderiales_incertae_sedis
22262	0	0	0	0	0	0	0	0	0	2	3	0	0	0	0	0	0	3	7	0	0	0	57	0	Bacteria;Proteobacteria;Betaproteobacteria;Burkholderiales
2984	0	0	1	0	0	0	0	0	0	0	0	0	0	0	0	0	0	7	6	0	0	0	61	0	Bacteria;Bacteroidetes;Flavobacteria;Flavobacteriales;Flavobacteriaceae;Flavobacterium
29388	0	0	0	0	0	0	0	1	0	0	0	0	0	0	0	0	0	33	43	0	0	0	0	1	Bacteria;Proteobacteria;Gammaproteobacteria;Pseudomonadales;Moraxellaceae;Acinetobacter
32854	0	0	0	0	0	0	0	0	0	0	27	0	0	0	0	0	0	0	1	0	0	0	54	0	Bacteria;Bacteroidetes;Sphingobacteria;Sphingobacteriales;Chitinophagaceae
13064	0	0	0	0	0	0	0	0	0	0	0	0	83	0	0	2	0	0	0	0	0	0	0	0	Bacteria;Firmicutes;Clostridia;Clostridiales
52386	4	1	0	28	0	0	0	1	0	0	0	0	0	6	0	25	4	13	8	0	0	0	0	0	Bacteria;Firmicutes;Bacilli;Bacillales;Bacillaceae;Lysinibacillus
54797	0	0	0	0	0	0	0	0	0	0	0	0	5	0	0	63	0	0	24	0	0	0	0	0	Bacteria;Bacteroidetes;Bacteroidia;Bacteroidales
25261	0	1	0	0	0	0	0	0	0	1	2	57	0	3	0	0	0	0	0	0	0	0	36	0	Bacteria;Bacteroidetes;Sphingobacteria;Sphingobacteriales;Sphingobacteriaceae;Pedobacter
23699	0	0	0	0	0	0	0	0	0	0	91	1	0	0	0	0	0	0	0	0	0	0	11	0	Bacteria;Bacteroidetes;Sphingobacteria;Sphingobacteriales;Sphingobacteriaceae;Pedobacter
43252	0	0	0	0	0	0	0	0	0	0	2	0	0	0	2	0	0	0	1	0	0	0	100	0	Bacteria;Bacteroidetes;Flavobacteria;Flavobacteriales;Flavobacteriaceae;Flavobacterium
63411	0	0	0	0	0	0	0	0	0	0	0	0	0	0	3	0	0	0	102	0	0	0	9	0	Bacteria;Proteobacteria;Betaproteobacteria;Burkholderiales;Oxalobacteraceae
7105	0	0	0	1	0	0	0	0	0	0	0	0	0	3	0	6	1	70	10	0	0	0	1	29	Bacteria;Firmicutes;Bacilli;Bacillales;Planococcaceae;Kurthia
15910	0	0	0	0	0	0	0	0	0	0	2	0	0	121	3	0	0	5	8	0	0	0	4	0	Bacteria;Proteobacteria;Betaproteobacteria;Burkholderiales;Comamonadaceae;Curvibacter
9048	0	0	0	0	0	0	0	0	0	0	0	0	0	1	0	0	7	0	0	0	0	0	151	22	Bacteria;Firmicutes;Clostridia;Clostridiales;Ruminococcaceae
9206	0	0	0	0	0	0	0	0	0	0	0	0	0	0	3	10	5	2	0	0	17	154	1	0	Bacteria;Bacteroidetes;Bacteroidia;Bacteroidales
55180	0	0	0	3	0	1	1	3	2	0	0	0	0	0	0	38	7	0	0	0	38	95	9	12	Bacteria;Bacteroidetes;Bacteroidia;Bacteroidales;Porphyromonadaceae;Parabacteroides
22863	0	0	0	1	0	4	8	0	0	0	0	0	220	1	0	0	0	0	0	0	0	0	0	3	Bacteria;Bacteroidetes;Bacteroidia;Bacteroidales;Prevotellaceae;Prevotella
48323	0	0	1	0	0	0	0	0	0	6	242	0	0	0	0	0	0	0	1	0	0	0	0	0	Bacteria;Proteobacteria;Alphaproteobacteria;Caulobacterales;Caulobacteraceae;Caulobacter
27867	0	0	0	0	0	0	0	0	0	123	118	0	0	0	0	0	0	0	0	0	0	0	21	0	Bacteria;Proteobacteria;Gammaproteobacteria
11687	0	0	0	0	0	0	0	0	0	0	0	0	0	27	0	0	0	2	228	0	0	0	10	0	Bacteria;Bacteroidetes;Flavobacteria;Flavobacteriales;Flavobacteriaceae;Chryseobacterium
21298	0	0	0	0	0	0	2	0	0	0	0	0	6	0	0	1	15	1	3	2	0	2	209	45	Bacteria;Actinobacteria;Actinobacteria;Coriobacteriales;Coriobacteriaceae
56451	0	2	0	0	0	18	21	0	2	0	0	0	0	0	0	2	1	0	0	0	1	277	8	0	Bacteria;Firmicutes;Clostridia;Clostridiales
31782	0	0	0	0	0	137	189	0	0	0	0	0	0	0	0	0	0	0	0	0	0	0	36	0	Bacteria
24127	0	0	0	1	0	0	0	0	4	0	0	0	0	0	0	4	2	30	109	8	214	86	0	1	Bacteria;Bacteroidetes;Bacteroidia;Bacteroidales;Porphyromonadaceae
27386	0	0	0	0	0	0	0	0	0	0	1	1	0	21	0	0	0	61	26	0	0	0	382	0	Bacteria;Bacteroidetes;Sphingobacteria;Sphingobacteriales
