# Supplementary material for: Sympatric chimpanzees and gorillas harbor convergent gut microbial communities
Source: HighWire-hosted journal article supplement (doi:10.1101/gr.154773.113), 2013-06-26
Supplement: Supplemental_Material.zip [file TableS3.xlsx]

## Sheet: Sheet1
#OTU ID	DG408	DG426	DG432	EK520	LB01	LB03	LB06	LB10	LB13	LB178	LB179	BB231	BB232	ME2528	ME2530	MT334	MT348	WE457	WE458	WE464	CP469	CP470	BB089	BB095	KSG0645	KSG0647	KSG0652	KSG0660	KSG0673	KE1474	KE1475	KE2263	KE2265	KE2268	KE2564	KE2565	KE2581	KSG1471	KSG1507	LU2555	LU2556	OP1909	OP1910	OP1911	OP2345	OP2346	OP2347	OP2456	OP2459
69	3	1	6	2	3	149	34	2	0	1	0	0	261	2	4	0	0	0	0	0	0	1	2	1	0	0	0	0	0	0	3	0	1	0	0	0	0	21	0	0	0	1	2	1	2	1	0	3	4
86	0	0	0	0	0	0	0	0	0	0	0	0	0	0	0	11	0	6	4	0	10	58	95	63	9	9	18	13	2	0	0	0	0	0	0	0	0	0	0	0	0	0	0	0	0	0	0	0	0
95	0	0	0	2	0	0	0	0	0	0	1	15	0	210	168	0	0	0	0	0	0	0	26	0	0	0	0	0	0	1	8	0	0	0	1	3	0	16	0	0	0	0	0	0	2	4	1	2	7
111	0	0	0	0	0	0	0	0	0	0	0	0	0	0	0	0	0	0	3	2	0	0	1	5	0	0	0	0	0	0	0	0	0	0	0	0	0	0	0	0	0	0	1	0	1	0	2	0	0
146	0	0	0	0	0	0	0	0	0	0	0	0	0	0	0	1	0	0	0	0	0	0	0	0	1	5	0	3	4	0	0	0	0	0	0	0	0	0	0	0	0	0	0	0	0	0	0	0	0
237	0	0	0	0	0	0	0	0	0	1	0	0	0	0	0	0	0	0	0	0	0	0	0	0	0	0	0	0	0	0	0	0	0	0	0	0	0	0	0	0	0	39	97	19	0	0	0	0	0
254	0	0	0	15	0	0	0	1	52	0	0	0	0	0	4	0	0	0	0	0	0	0	0	0	0	0	0	0	0	0	0	0	0	0	0	0	0	0	0	0	0	0	0	0	4	0	0	0	3
262	117	13	0	2	0	0	0	0	0	16	4	15	0	4	7	0	0	0	0	0	0	0	1	0	0	0	0	0	0	359	513	41	188	358	88	78	49	53	7	0	0	11	5	3	3	3	2	0	11
267	1	1	1	0	0	0	0	0	0	8	2	28	0	1	0	0	0	0	2	0	0	0	9	0	0	0	0	0	0	0	1	8	11	11	0	5	0	0	2	0	0	4	0	0	0	0	0	0	0
283	1	0	0	1	6	0	0	1	0	0	0	0	13	0	0	178	0	67	269	22	0	10	22	97	0	0	0	0	0	0	0	0	0	0	0	0	0	0	0	0	0	0	0	0	0	0	0	0	0
323	0	0	0	3	37	41	46	13	26	0	0	4	56	0	0	0	0	0	0	0	0	0	0	0	3	4	0	0	4	0	0	0	0	0	1	0	3	1	0	0	0	1	3	1	7	8	4	9	2
327	0	0	0	0	0	0	0	0	0	0	0	0	0	0	0	0	0	232	50	1	0	0	0	25	0	0	0	0	0	0	0	0	0	0	0	0	0	0	0	0	0	0	0	0	0	0	0	0	2
354	0	0	0	0	0	0	0	0	0	0	0	0	0	0	0	5	0	0	0	0	0	67	5	6	0	0	0	0	0	0	0	0	0	0	0	0	0	0	0	0	0	0	0	0	0	0	0	0	0
384	0	0	0	0	0	0	0	0	0	0	0	0	0	1	0	0	0	18	49	0	0	0	0	0	0	0	0	0	0	0	0	0	0	0	0	0	0	2	0	0	0	0	0	0	0	0	0	0	0
396	0	2	0	4	0	0	0	1	2	0	0	0	0	0	2	0	0	47	20	0	0	0	1	1	0	0	0	0	0	0	0	0	0	0	1	1	0	0	0	0	0	0	0	0	4	0	2	2	0
399	0	0	0	0	11	0	0	0	1	0	0	0	40	0	0	0	0	0	0	0	0	0	0	0	0	0	0	0	0	0	0	0	0	0	0	0	0	0	0	0	0	1	0	0	0	0	0	0	0
471	0	0	0	0	0	0	0	3	2	0	0	0	0	0	0	0	3	0	0	0	0	0	2	2	0	0	0	0	0	0	0	0	0	0	0	0	0	0	0	0	0	0	0	0	0	0	2	6	0
484	0	0	0	0	0	0	0	0	0	0	0	0	0	0	0	0	0	5	165	0	0	0	0	0	0	0	0	0	0	0	0	0	0	0	0	0	0	0	0	0	0	0	0	0	0	0	0	0	0
486	0	0	0	0	0	0	0	0	0	0	0	0	0	0	0	8	19	37	1289	33	45	0	0	0	0	0	0	0	0	0	0	0	0	0	0	0	0	0	1	0	0	1	8	1	2	0	2	2	0
510	0	0	0	0	0	0	0	0	0	0	0	0	0	0	0	0	1	0	4	0	6	9	0	1	11	14	0	6	5	0	0	0	0	0	0	0	0	0	0	0	0	0	0	0	0	0	0	0	0
592	0	0	0	0	0	0	0	1	0	1	0	0	0	0	0	70	13	335	77	304	135	21	50	486	0	0	0	0	0	0	0	1	0	0	0	0	0	0	0	0	0	0	0	0	0	0	0	0	0
697	0	0	0	0	0	0	0	0	0	0	0	0	0	0	0	0	2	0	0	0	0	0	0	0	0	0	0	0	0	0	0	0	0	0	0	0	0	0	0	0	0	0	0	0	0	0	0	0	0
703	0	0	0	0	0	0	0	0	0	0	0	0	0	0	0	3	6	1	2	0	1	8	0	0	0	0	0	4	1	0	0	0	0	0	0	0	0	0	0	0	0	1	2	2	4	1	1	1	1
712	0	0	0	0	0	0	0	0	0	0	0	0	0	0	0	0	0	0	37	1	0	0	0	0	0	1	0	1	6	0	0	0	0	0	0	0	0	0	0	0	0	0	0	0	0	0	0	0	0
728	0	0	0	0	0	0	0	0	0	0	0	0	0	0	0	26	0	0	0	0	22	0	0	0	1	0	0	0	0	0	0	0	0	0	0	0	0	0	0	0	0	0	0	0	0	0	0	0	0
744	0	0	0	0	0	0	0	0	0	0	0	0	0	0	0	0	50	0	0	0	0	0	0	0	0	0	0	0	0	0	0	0	0	0	0	0	0	0	0	0	0	0	0	0	0	0	0	0	0
822	0	0	0	0	0	0	0	0	0	0	0	0	0	0	0	0	0	0	0	0	0	0	6	2	0	0	0	0	0	0	0	0	0	0	0	0	0	0	0	0	0	0	0	0	0	0	0	0	0
828	0	0	0	0	1	0	2	0	7	0	0	0	44	0	0	9	1	0	28	5	0	2	6	28	3	2	0	11	7	0	0	0	1	0	0	0	0	0	0	0	0	0	0	0	0	1	1	2	0
854	0	0	0	1	1	0	1	3	5	0	0	0	3	0	0	5	1	0	8	1	8	0	0	0	0	0	0	0	3	0	0	0	0	0	0	0	0	0	0	0	0	0	0	0	1	2	3	2	0
861	0	0	0	0	0	0	0	0	0	0	0	0	0	0	0	1	0	0	0	0	0	0	0	0	0	0	0	0	0	0	0	0	0	0	0	0	0	0	0	0	0	2	1	0	1	2	0	1	0
898	0	0	0	0	0	0	0	0	0	0	0	0	0	0	0	0	0	0	0	0	0	0	0	0	0	0	0	0	0	0	0	2	0	0	0	0	0	0	0	0	0	40	17	11	0	0	0	0	0
915	0	0	0	0	0	1	0	0	0	0	0	0	0	0	0	0	0	0	0	0	0	2	0	0	0	279	4	131	1	0	0	0	0	0	105	131	242	0	0	0	0	0	0	0	0	0	0	0	0
921	0	0	0	0	0	0	0	0	0	0	0	0	0	0	0	4	0	0	1	0	0	0	0	0	0	0	0	0	0	0	0	0	0	0	0	0	0	0	0	0	0	0	0	0	0	0	0	0	0
955	0	0	0	0	0	0	0	0	0	0	0	0	0	0	0	2	1	0	0	3	0	1	37	55	0	0	0	0	0	0	0	0	0	0	0	0	0	0	0	0	0	0	0	0	0	0	0	0	0
961	0	0	0	0	0	0	0	0	0	0	0	0	0	0	0	0	1	0	0	0	4	5	0	0	2	0	1	3	0	0	0	0	0	0	0	0	0	0	0	0	0	2	11	2	3	5	9	3	0
1014	120	211	378	9	0	0	0	0	0	10	3	87	0	615	54	0	0	0	0	0	0	0	86	0	0	0	0	0	0	233	197	7	13	1	51	43	45	185	41	0	0	53	223	29	8	33	8	6	42
1016	0	0	0	0	0	0	0	0	0	0	0	0	0	0	0	40	31	0	9	1	5	136	5	16	0	0	0	0	0	0	0	0	0	0	0	0	0	0	0	0	0	4	3	5	19	3	10	11	0
1028	0	3	1	2	2	14	22	0	3	0	0	0	47	0	0	0	0	0	0	0	0	0	0	0	0	0	0	0	0	0	0	0	0	0	0	0	0	0	0	0	0	0	0	0	0	0	0	0	0
1035	0	0	0	0	0	0	0	0	0	0	0	0	0	0	0	13	3	0	0	0	12	11	3	0	0	0	0	1	5	0	0	0	0	0	0	0	0	0	0	0	0	0	0	0	0	0	0	0	0
1119	0	0	0	0	0	0	0	0	0	0	0	0	0	0	0	0	20	0	0	0	0	0	0	0	0	0	0	0	0	0	0	0	0	0	0	0	0	0	0	0	0	0	0	0	0	0	0	0	0
1205	0	0	0	0	0	0	0	0	0	0	0	0	0	0	0	0	0	0	0	0	0	0	0	0	0	0	0	0	0	0	0	0	0	0	0	0	0	0	0	52	65	0	0	0	0	0	0	0	0
1245	2	1	34	14	112	0	0	0	2	0	2	7	3	0	0	13	198	0	14	0	84	54	44	2	48	1	7	76	37	4	2	0	0	0	17	4	8	58	6	0	0	4	6	2	0	0	0	0	0
1253	0	0	0	0	0	0	0	0	0	0	0	0	0	0	0	0	4	8	0	0	14	30	8	2	2	3	1	5	6	0	0	0	0	0	0	0	0	0	0	0	0	0	0	0	0	0	1	2	0
1264	1	0	1	0	0	0	0	0	0	11	1	0	0	0	0	0	0	0	1	0	0	0	1	0	0	0	0	0	0	2	4	61	3	0	1	7	0	2	1	1	2	11	6	12	0	0	0	0	0
1271	0	0	0	0	0	0	0	0	0	0	0	0	0	0	0	0	1	0	0	0	0	1	0	0	0	0	0	0	0	0	0	0	0	0	0	0	0	0	0	0	0	0	0	0	0	0	0	0	0
1334	0	0	0	0	0	0	0	0	0	0	0	0	0	0	0	0	0	0	0	0	0	0	0	0	0	0	0	0	0	0	0	0	0	0	0	0	0	0	0	0	0	45	85	59	0	0	0	0	0
1339	0	0	0	0	0	0	0	0	0	6	39	1	0	5	0	0	0	5	2	0	0	0	17	0	0	0	0	0	0	0	0	7	0	0	0	0	0	0	0	0	0	0	0	0	0	2	0	0	0
1455	0	1	0	8	3	19	11	6	6	0	0	0	0	0	0	0	0	0	0	0	0	0	0	0	0	0	0	0	0	0	0	0	0	1	7	2	6	0	0	0	0	0	1	0	9	13	8	18	15
1465	0	0	0	0	0	0	0	0	0	0	0	0	0	0	0	0	0	0	0	0	0	0	0	0	0	0	0	0	0	0	0	0	0	0	0	0	0	0	0	0	0	0	0	0	0	0	0	0	0
1469	0	0	0	0	0	0	0	0	0	0	0	0	0	0	0	0	0	0	2	0	2	1	12	0	0	0	0	0	0	0	0	0	0	0	0	0	0	0	0	0	0	0	0	0	0	0	0	0	0
1513	0	11	1	9	50	163	151	26	158	0	0	1	43	0	0	0	0	0	0	0	0	0	0	0	0	0	0	0	0	5	1	0	0	0	10	12	7	15	2	0	0	18	13	9	3	4	6	4	1
1528	6	15	6	1	0	0	0	1	1	0	0	0	0	0	2	2	0	11	28	0	0	0	3	1	0	0	0	0	0	6	7	2	4	3	15	9	20	3	3	0	0	0	0	0	4	3	13	3	26
1592	0	0	0	0	5	6	7	6	3	0	0	0	11	0	0	0	0	0	2	10	0	0	2	17	0	0	0	0	0	0	0	0	0	0	1	2	1	0	0	0	0	0	0	0	0	0	0	0	0
1602	0	0	0	0	0	0	0	0	0	0	0	0	0	0	0	0	0	0	0	0	0	0	0	0	0	0	0	0	0	35	20	2	29	48	34	33	35	0	0	0	0	0	0	0	0	0	0	0	0
1655	0	0	0	0	0	0	0	0	0	0	0	0	0	0	0	1	0	0	0	0	2	35	3	0	1	1	0	1	5	0	0	0	0	0	0	0	0	0	0	0	0	0	0	0	1	1	1	6	0
1661	1	0	0	0	0	0	0	0	0	0	0	0	0	0	0	0	0	0	0	0	0	0	0	0	0	0	0	0	0	0	0	0	0	0	0	0	0	0	0	34	27	0	0	0	0	0	0	0	0
1676	1	0	0	0	0	0	0	0	0	1	0	1	0	0	0	0	0	0	0	0	0	0	0	0	0	0	0	0	0	9	23	0	7	4	1	1	2	0	0	0	0	0	0	0	0	0	0	0	0
1698	0	0	0	0	0	0	0	0	0	0	0	0	0	0	0	0	0	0	0	0	0	0	0	0	0	0	0	0	0	1	0	1	1	0	16	21	40	2	0	0	0	0	5	2	0	0	0	1	0
1743	0	0	0	0	0	0	0	0	0	0	0	0	0	0	0	0	0	0	0	0	4	118	0	0	0	0	0	0	0	0	0	0	0	0	0	0	0	0	0	0	0	0	0	0	0	0	0	0	0
1763	0	0	0	0	0	0	0	0	0	0	0	0	1	0	0	6	0	0	28	0	0	0	0	0	0	0	0	0	0	0	0	0	0	0	0	0	0	0	0	0	0	0	0	0	0	0	0	0	0
1795	1	2	1	54	16	15	30	139	118	0	0	4	26	0	1	0	0	0	0	0	0	0	0	0	0	0	0	0	0	3	3	0	0	0	15	11	22	2	0	0	0	14	25	20	16	15	19	20	9
1803	0	0	0	0	0	0	0	0	0	45	97	1	0	0	0	0	0	0	0	0	0	0	0	0	0	0	0	0	0	0	0	27	1	0	0	1	0	0	0	0	0	2	1	0	0	0	0	0	0
1807	0	0	0	0	0	0	0	0	0	7	53	0	0	0	2	0	0	0	0	0	0	0	1	0	0	0	0	0	0	0	0	23	0	0	0	0	0	0	0	7	14	0	0	1	0	0	0	0	0
1834	0	0	0	0	0	0	0	0	0	0	0	0	0	0	0	0	2469	0	0	0	0	0	0	0	0	0	0	2	0	0	0	0	0	0	0	0	0	0	0	0	0	0	4	4	0	0	0	0	0
1846	2	0	0	0	0	0	0	0	0	0	0	0	0	0	1	0	0	0	0	0	0	0	2	0	0	0	0	0	0	0	0	0	0	0	0	0	0	0	0	0	0	48	20	10	0	0	0	0	0
1890	3	0	2	0	0	0	0	0	0	1	0	2	0	0	0	0	0	0	0	0	0	0	0	0	0	0	0	0	0	2	1	35	27	46	0	4	2	2	0	0	0	0	0	0	0	0	0	0	0
1891	0	0	0	7	6	3	12	13	10	0	0	1	0	0	0	0	0	0	0	0	0	0	0	0	0	0	0	0	0	0	0	0	0	0	0	0	1	0	0	0	0	0	0	0	0	3	0	0	0
1934	0	0	0	0	0	0	0	0	0	0	0	0	0	0	0	0	0	2	0	0	0	0	0	0	0	0	0	0	0	0	0	0	0	0	0	0	0	0	0	0	0	0	0	0	0	0	0	0	0
1985	0	0	0	0	0	0	0	0	0	6	66	13	0	2	1	0	0	0	0	0	0	0	27	0	0	0	0	0	0	0	0	10	0	2	0	0	0	0	0	0	0	0	0	0	0	0	0	0	0
2044	0	0	0	0	0	0	0	0	0	37	38	0	0	0	3	0	0	0	0	0	0	0	3	0	0	0	0	0	0	0	0	11	7	2	0	1	0	3	1	0	0	0	0	4	0	0	0	0	0
2119	0	0	0	0	0	0	0	0	0	0	0	0	0	0	0	0	0	0	0	1	0	0	0	0	40	35	37	38	43	0	0	0	0	0	0	0	0	0	0	0	0	0	0	0	0	0	0	0	0
2137	0	0	0	0	0	0	0	0	0	0	0	0	0	0	0	0	0	4	3	0	0	0	0	0	0	0	0	0	0	0	0	0	0	0	0	0	0	0	0	0	0	0	0	0	0	0	0	0	0
2170	0	0	0	0	0	1	3	2	1	0	0	0	0	0	0	21	11	1	12	4	19	36	4	26	18	19	2	9	22	0	0	0	0	0	2	2	2	0	0	0	0	0	0	0	0	1	2	1	0
2182	0	0	0	0	0	0	0	0	0	0	0	0	0	0	0	0	0	34	72	1	0	57	0	19	0	0	0	0	0	0	0	0	0	0	0	0	0	0	0	0	0	0	0	0	0	0	0	0	0
2201	0	0	0	0	0	0	0	0	0	0	0	0	0	0	0	0	0	0	0	0	0	0	0	0	0	0	0	0	0	0	0	0	0	0	0	2	1	0	0	0	0	0	0	0	0	2	0	0	0
2239	0	0	0	0	0	0	0	0	0	0	0	0	0	0	0	0	0	0	12	2	0	0	0	0	0	0	0	0	0	0	0	0	0	0	0	0	0	0	0	0	0	0	0	0	0	0	0	0	0
2260	0	0	0	0	0	0	0	0	0	0	0	0	0	0	1	0	0	0	2	0	0	0	0	0	0	0	0	0	0	0	1	0	2	0	0	0	0	0	0	0	0	1	0	0	3	12	4	8	1
2386	0	0	0	0	0	0	0	0	0	0	0	0	0	0	0	0	0	0	1	0	0	87	0	0	0	0	0	0	0	0	0	0	0	0	0	0	1	0	0	0	0	0	0	0	0	0	0	0	3
2433	0	0	0	0	0	0	0	0	0	0	0	0	0	0	0	15	12	5	18	1	0	10	0	35	0	2	11	56	0	0	0	0	0	0	0	0	0	0	0	0	0	0	0	0	28	24	59	44	23
2450	4	2	0	1	0	0	0	11	0	0	0	0	0	3	0	0	0	0	12	0	0	0	1	1	0	0	0	0	0	0	2	0	0	0	0	0	0	0	0	0	0	26	0	17	0	2	2	0	3
2506	0	0	0	0	0	0	0	0	0	0	0	0	0	0	0	0	4	0	0	0	0	0	0	0	0	0	0	0	0	0	0	0	0	0	0	0	0	0	0	0	0	0	0	0	0	0	0	0	0
2530	0	0	0	0	0	0	0	0	0	0	0	0	0	0	0	0	5	0	0	0	0	0	0	0	0	0	0	0	0	0	0	0	0	0	0	0	0	0	0	0	0	0	0	0	0	0	0	0	0
2584	116	2	94	3	0	0	0	1	0	92	52	118	0	2	19	0	0	0	0	0	0	1	267	0	0	0	0	0	0	100	174	13	23	18	49	49	46	75	82	40	45	693	390	920	2	1	0	2	1
2585	0	0	0	0	0	0	0	0	0	0	0	0	0	0	0	12	23	0	0	0	0	0	0	0	0	0	0	0	0	0	0	0	0	0	0	0	0	0	0	0	0	0	1	0	5	11	9	13	5
2645	0	0	0	0	0	0	0	0	0	0	0	0	0	0	9	0	0	0	0	0	0	0	6	0	0	0	0	0	0	0	0	0	0	1	0	0	0	60	12	0	0	0	1	0	0	0	0	0	0
2656	0	0	0	0	0	0	0	0	0	0	0	0	0	0	0	0	0	0	0	0	0	0	0	0	10	19	1	18	14	0	0	0	0	0	0	0	0	0	0	0	0	0	0	0	0	0	0	0	0
2657	0	0	0	0	0	0	0	0	0	0	0	0	0	0	0	0	0	0	0	0	0	0	0	0	25	2	0	23	1	0	0	0	0	0	0	0	0	0	0	0	0	0	0	0	0	0	0	0	0
2666	1	4	0	0	0	0	0	0	0	0	0	2	0	0	0	0	0	25	21	0	0	0	1	0	0	0	0	0	0	0	0	0	0	0	0	0	0	0	0	0	0	0	0	0	0	0	0	0	0
2676	1	3	5	29	27	23	28	97	34	0	0	1	329	8	3	4	0	33	17	40	0	229	48	64	32	19	4	32	27	0	0	0	1	0	0	0	0	0	0	0	0	0	0	0	0	0	0	0	0
2678	0	0	0	0	0	0	0	0	0	51	21	0	0	0	0	0	0	0	0	0	0	0	0	0	0	0	0	0	0	0	0	0	1	0	0	0	0	0	0	0	0	0	0	0	0	0	0	0	0
2684	2	0	0	0	0	0	0	0	0	0	0	5	0	0	0	0	0	0	1	0	0	0	1	0	0	0	0	0	0	0	0	5	38	44	0	0	0	0	0	0	0	0	0	0	0	0	0	0	0
2705	0	0	0	0	0	0	0	0	0	0	0	0	6	0	0	0	0	3	1	0	157	0	0	0	0	0	0	0	0	0	0	0	0	0	0	0	0	0	0	0	0	0	0	0	3	1	4	5	0
2713	0	0	0	0	0	0	0	0	0	5	37	0	0	0	1	0	0	2	3	0	0	0	1	0	0	0	0	0	0	0	0	7	0	0	0	0	0	0	0	0	0	0	0	0	0	0	0	0	1
2759	0	0	0	0	0	0	0	0	0	0	0	0	0	0	0	0	27	11	0	1	1	32	1	6	19	41	1	93	42	0	0	0	0	0	0	0	0	0	0	0	0	0	0	0	0	0	0	0	0
2769	0	0	0	0	0	0	0	0	0	0	0	0	0	0	0	7	1	1	2	0	0	0	7	1	27	0	2	0	6	0	0	0	0	0	0	0	0	0	0	0	0	0	1	1	0	0	0	0	0
2785	0	0	0	0	0	0	0	0	0	0	0	0	0	0	0	2	4	1	0	6	0	58	23	9	0	0	0	0	0	0	0	0	0	0	0	0	0	0	0	0	0	0	0	0	0	0	0	0	0
2786	1	0	0	0	0	0	0	0	0	2	2	1	0	0	1	0	0	0	0	0	0	0	36	0	0	0	0	0	0	1	0	6	2	5	0	0	0	1	6	0	0	0	0	0	0	0	0	0	0
2823	0	0	0	0	0	10	9	25	1	0	0	0	0	0	0	0	0	0	0	0	0	0	0	0	0	0	0	0	0	1	0	0	0	0	2	0	3	0	0	0	0	0	1	0	1	2	2	0	1
2853	0	0	0	126	0	0	0	1	54	1	1	0	0	2	5	0	0	0	0	0	0	0	0	0	0	0	0	0	0	0	0	0	0	1	0	0	0	0	0	0	0	0	0	0	6	0	0	2	7
2859	0	0	0	0	0	0	0	0	0	0	0	0	0	0	0	0	0	0	0	0	0	0	0	0	6	64	9	124	32	0	0	0	0	0	0	0	0	0	0	0	0	0	0	0	0	0	0	0	0
2879	0	0	0	0	0	0	0	0	0	0	0	0	0	0	0	0	0	0	1	0	0	0	0	0	0	0	0	0	0	0	0	0	0	0	0	0	0	0	0	0	0	0	0	0	0	0	0	0	0
2895	0	0	0	0	0	0	0	0	0	0	0	0	0	0	0	0	2	1	0	0	21	5	2	5	0	0	1	1	0	0	0	0	0	0	0	0	0	0	0	0	0	0	0	0	0	0	4	2	0
2909	0	0	0	0	0	0	0	0	0	0	0	0	0	0	0	2	65	0	3	0	3	0	22	1	1	0	0	26	3	0	0	0	0	0	0	0	0	0	0	0	0	1	1	3	0	0	0	0	0
2933	0	0	0	0	0	0	0	0	0	0	0	0	0	0	0	18	4	0	3	0	0	4	0	0	2	0	0	2	1	0	0	0	0	0	0	0	0	0	0	0	0	0	1	1	7	20	19	9	3
2943	7	0	0	0	0	0	0	0	0	9	7	0	0	13	0	0	0	0	0	0	0	0	1	0	0	0	0	0	0	11	2	0	22	2	1	3	0	0	1	0	0	0	0	0	0	0	5	0	6
2984	0	0	1	0	0	0	0	0	0	0	0	0	0	0	0	0	0	7	6	0	0	0	61	0	0	0	0	0	0	0	0	0	0	0	0	0	0	0	0	0	0	0	0	0	0	0	0	0	0
3049	2	1	0	0	0	0	0	0	1	9	0	42	0	0	1	0	0	0	0	0	0	0	1	0	0	0	0	0	0	0	0	0	0	0	0	0	0	0	0	0	0	0	0	0	5	6	0	16	22
3069	0	0	0	10	2	0	27	25	3	0	0	0	7	2	0	0	0	0	0	0	0	0	0	0	0	0	0	0	0	0	0	0	0	0	0	0	0	0	0	0	0	0	0	0	0	3	1	0	0
3107	0	3	0	6	23	17	108	5	26	0	0	0	26	3	0	18	77	4	36	0	158	1543	497	371	109	15	13	414	264	1	0	0	3	3	9	9	20	10	1	0	0	4	9	7	57	38	101	154	11
3114	0	0	0	0	0	0	0	0	0	0	0	0	0	0	0	0	0	0	0	0	0	0	0	0	0	0	0	0	0	0	0	0	0	0	0	0	0	0	0	0	0	0	0	0	0	0	0	0	0
3135	7	82	3	0	0	0	0	2	2	0	0	38	0	6	129	0	0	55	79	0	0	0	3	2	0	0	0	0	0	667	431	0	0	0	3	2	7	892	1297	0	0	0	0	0	0	1	0	0	0
3146	1	3	0	8	0	0	0	2	5	0	0	7	0	1	0	0	0	0	0	0	0	0	0	0	0	0	0	0	0	2	3	0	0	1	7	3	1	0	1	0	0	0	0	0	20	5	2	4	2
3225	0	0	0	0	0	0	0	0	0	0	3	32	0	8	7	0	0	0	0	0	0	0	0	0	0	0	0	0	0	0	0	0	1	0	0	0	0	0	0	0	0	0	0	0	2	5	4	1	11
3328	0	0	0	0	0	0	0	0	0	0	0	0	0	0	0	0	0	0	0	0	0	0	0	0	0	0	0	0	0	0	0	2	0	0	2	7	0	0	0	0	0	886	1193	1321	0	0	0	1	1
3333	0	0	0	0	0	0	0	0	0	0	0	0	0	0	0	5	6	17	22	5	4	1	80	155	456	189	130	886	356	3	0	0	0	0	30	52	85	11	1	0	0	3	0	0	12	8	24	31	9
3343	0	0	0	0	0	0	0	0	0	0	0	0	0	0	0	0	0	0	0	0	0	0	0	0	0	0	0	0	0	0	0	0	0	0	0	0	0	0	0	0	0	0	0	0	0	0	0	0	0
3351	0	0	0	0	0	0	0	0	0	0	0	0	0	0	0	0	0	0	1	0	0	0	0	0	0	0	0	0	0	0	0	0	0	0	0	0	0	0	0	0	0	12	25	16	2	0	4	7	0
3418	0	0	0	0	0	0	0	0	0	13	6	0	0	2	3	0	0	0	0	0	0	0	0	0	0	0	0	0	0	1	2	23	9	0	0	0	0	0	0	0	0	2	0	0	0	0	0	0	2
3480	0	0	0	0	0	0	0	0	0	0	0	0	0	0	0	0	0	0	0	0	0	0	0	0	1	53	0	0	3	0	0	0	0	0	0	0	0	0	0	0	0	0	0	0	0	0	0	0	0
3509	0	0	0	0	0	0	0	0	0	0	0	0	0	0	0	0	0	0	0	0	0	0	0	0	1	18	2	23	15	0	0	0	0	0	0	0	0	0	0	0	0	0	0	0	0	0	0	0	0
3510	7	2	33	5	0	0	0	0	0	9	5	20	0	2	5	0	0	0	12	0	0	0	77	2	0	0	0	0	0	20	31	11	54	12	3	9	2	0	66	0	0	0	0	0	0	0	0	0	0
3547	0	0	0	0	0	0	0	0	0	29	24	12	0	0	0	0	0	0	0	0	0	0	24	0	0	0	0	0	0	0	0	3	0	0	0	0	0	0	0	0	0	0	0	0	3	4	2	1	7
3554	0	0	0	0	0	0	0	0	0	0	0	0	0	0	0	0	2	0	0	0	0	0	1	1	0	0	0	0	0	0	0	0	1	0	0	0	0	0	0	0	0	0	0	0	0	0	0	0	0
3562	74	2	8	1	0	0	0	0	0	1	0	55	0	48	12	0	0	0	0	0	0	0	42	0	0	0	0	0	0	0	0	6	20	1	73	4	13	3	0	0	0	0	0	0	0	2	1	0	4
3586	0	0	0	0	0	0	0	0	0	0	0	0	0	0	0	0	0	0	0	0	0	0	0	0	0	0	0	0	1	0	0	0	0	0	0	0	0	0	0	0	0	0	0	0	0	0	0	0	0
3657	0	0	0	0	0	0	0	0	0	0	0	0	0	0	0	0	0	4	14	3	0	0	6	0	18	7	0	1	0	0	0	0	0	0	0	0	0	0	0	0	0	0	0	0	0	0	0	0	0
3687	0	0	0	0	0	0	0	0	0	0	0	0	0	0	0	0	0	0	0	0	4	265	0	0	0	0	0	0	0	0	0	0	0	0	0	0	0	0	0	0	0	0	0	0	0	0	0	0	0
3781	0	0	0	0	0	0	0	0	0	0	0	0	0	0	0	7	0	39	432	8	0	0	0	0	0	0	0	0	0	0	0	0	0	0	0	0	0	0	0	0	0	0	0	0	0	0	0	0	0
3831	0	0	0	0	0	1	0	0	0	0	0	0	0	0	0	4	9	1	1	0	1	2	1	8	1	8	0	0	2	0	0	0	0	0	0	0	0	0	0	0	0	0	0	0	0	0	1	0	0
3883	13	26	0	0	61	12	7	0	408	0	0	0	0	0	1	0	0	0	0	0	0	0	0	0	0	0	0	0	0	0	0	0	0	0	0	0	0	0	0	0	0	0	0	0	0	0	0	0	0
3942	0	0	0	0	0	0	0	0	0	3	4	0	0	0	4	0	0	0	0	1	0	0	7	1	0	0	0	0	0	0	0	0	0	0	4	3	2	0	0	422	265	1	0	1	1	2	0	0	4
3984	0	0	0	0	0	0	0	0	0	42	6	0	0	0	0	0	0	0	0	0	0	0	0	0	0	0	0	0	0	0	0	0	0	0	0	0	0	0	0	0	0	0	0	0	1	3	3	0	1
4014	0	0	0	0	2	1	3	1	1	0	0	0	10	2	0	1	4	45	127	79	8	22	16	27	0	0	0	0	0	0	0	0	0	0	0	0	0	0	0	0	0	0	0	0	0	0	0	0	0
4030	0	0	0	0	0	0	0	0	0	8	3	0	0	0	0	0	0	0	0	0	0	0	0	0	0	0	0	0	0	0	0	0	0	0	0	0	0	0	0	0	0	23	43	13	0	0	0	0	0
4055	0	0	0	0	0	0	0	0	0	43	21	0	0	0	0	0	0	0	0	0	0	0	0	0	0	0	0	0	0	0	0	2	0	0	0	0	0	0	0	0	0	0	0	0	0	0	0	0	0
4059	0	0	0	0	0	0	0	0	0	0	0	0	0	0	0	0	1	0	0	0	0	0	0	0	0	0	0	0	0	0	0	0	0	0	0	0	0	0	0	0	0	0	0	0	0	0	0	0	0
4065	0	0	0	0	0	0	0	0	0	0	0	0	0	0	0	0	0	3	1	13	0	0	0	0	0	0	0	19	13	0	0	0	0	0	0	0	0	0	0	0	0	0	0	0	1	0	0	2	0
4106	2	0	12	64	0	0	0	4	0	1	0	0	0	9	0	0	0	0	5	0	0	0	2	1	0	0	0	0	0	0	0	0	0	0	0	0	0	0	0	0	0	5	3	2	0	5	2	0	1
4127	0	0	0	0	0	0	0	0	0	0	0	0	0	0	0	0	0	5	89	0	0	0	0	0	0	0	0	0	0	0	0	0	0	0	0	0	0	0	0	0	0	1	2	0	0	0	0	0	0
4129	0	0	0	0	0	0	0	0	0	0	0	0	0	0	0	24	0	2	0	0	4	0	0	20	0	0	0	0	0	0	0	0	0	0	0	0	0	0	0	0	0	0	0	0	0	0	0	0	0
4133	0	0	1	4	9	29	16	6	0	0	0	0	125	0	0	0	1	0	0	3	1	220	0	0	0	0	0	2	2	0	0	0	4	0	5	10	6	0	0	0	0	1	0	0	4	1	1	3	0
4149	0	0	0	0	0	0	0	0	0	0	0	0	0	0	0	0	0	0	0	0	0	0	0	0	0	0	0	0	0	0	0	0	0	0	0	0	0	0	0	84	22	1	0	0	0	0	0	0	0
4264	0	0	0	0	0	7	21	2	5	0	0	0	3	0	0	2	0	9	14	2	1	1	6	19	0	0	0	21	496	0	0	0	0	0	0	0	0	0	0	0	0	0	1	0	5	0	5	9	0
4267	0	0	0	0	0	0	0	0	0	0	0	0	0	0	0	0	0	0	0	0	0	0	0	0	114	28	43	138	58	0	0	0	0	0	0	0	0	0	0	0	0	0	0	0	0	0	0	0	0
4280	0	0	0	0	0	0	0	0	0	0	0	0	0	0	0	0	0	0	0	0	0	0	0	0	0	0	0	0	0	0	0	0	0	0	0	0	0	0	0	0	0	0	0	0	0	0	0	0	0
4297	0	0	0	0	0	0	0	0	0	0	0	0	0	0	0	6	2	15	0	14	0	0	0	0	1	0	0	2	20	0	0	0	0	0	0	0	0	0	0	0	0	0	0	0	0	0	0	0	0
4319	0	0	0	0	0	2	5	50	11	0	0	0	0	0	0	9	5	12	0	0	6	126	0	0	0	0	0	0	0	0	0	0	0	0	0	0	0	0	0	0	0	1	0	0	4	3	5	3	0
4394	0	0	1	20	43	27	27	8	4	0	0	0	1	0	1	0	0	0	0	0	0	0	0	0	0	0	0	0	0	0	0	0	0	0	0	0	2	0	0	0	0	0	0	0	2	4	5	0	0
4412	0	0	0	0	0	0	0	0	0	8	8	0	0	0	0	0	0	0	0	0	0	0	0	0	0	0	0	0	0	0	0	165	0	0	0	0	0	0	0	0	0	0	0	0	0	0	0	0	0
4457	0	0	0	0	0	0	0	0	0	0	0	0	0	0	0	0	0	39	80	54	0	0	0	0	0	0	1	0	0	0	0	0	0	0	0	0	0	0	0	0	0	0	0	0	0	0	0	0	0
4482	0	0	0	0	30	2	11	6	6	0	0	0	2	0	0	0	0	0	0	0	0	0	0	0	0	0	0	0	0	0	0	0	0	0	0	0	0	0	0	0	0	0	0	0	0	0	0	0	0
4489	0	0	0	0	0	0	1	1	0	0	0	0	0	0	0	0	2	0	0	0	2	0	7	0	2	0	0	10	0	1	0	0	0	0	0	0	0	1	0	0	0	0	3	1	0	1	2	2	2
4538	0	0	0	0	0	0	0	0	0	0	0	0	0	0	0	8	0	28	178	1	35	26	6	55	0	0	0	0	0	0	0	0	0	0	0	0	0	0	0	0	0	0	0	0	0	0	0	1	0
4574	2	1	2	0	0	0	0	1	0	1	1	0	0	4	3	0	0	5	12	0	0	0	13	0	0	0	0	0	0	0	1	0	2	6	2	0	0	0	1	0	0	0	0	0	0	1	0	0	0
4591	3	4	1	0	2	1	1	0	0	1	1	1	11	7	0	0	3	0	0	1	0	6	36	0	0	0	0	0	0	1	0	0	0	0	0	0	1	0	0	1	0	37	44	7	15	100	5	3	6
4624	0	0	0	0	0	0	0	0	0	0	0	0	0	0	0	0	27	0	1	0	0	3	0	0	0	0	0	1	0	0	0	0	0	0	0	0	0	0	0	0	0	0	1	0	0	0	0	0	0
4630	4	2	2	22	14	2	9	0	45	0	0	0	7	0	0	0	0	0	0	0	0	0	0	0	0	0	0	0	0	0	0	0	0	0	0	0	0	0	0	0	0	0	0	0	0	0	0	0	0
4641	2	1	0	0	0	0	0	0	0	1	0	5	0	0	0	0	0	0	0	0	0	0	0	0	0	0	0	0	0	0	0	1	0	3	0	0	0	0	0	0	0	12	0	18	0	5	1	1	6
4646	0	0	0	0	0	0	0	0	0	0	0	0	0	0	0	0	0	0	0	0	0	2	0	2	0	4	0	1	0	0	0	0	0	0	0	0	0	0	0	0	0	0	0	0	0	0	0	0	0
4650	0	0	0	0	0	0	0	0	0	0	0	0	0	0	0	0	0	0	0	0	0	0	0	0	0	0	0	0	0	0	0	0	0	0	0	0	0	0	0	0	0	0	0	0	0	0	0	0	0
4705	0	0	0	0	0	0	0	0	0	0	0	0	0	0	0	1	0	7	10	0	0	0	1	3	0	0	0	0	0	0	0	0	0	0	0	0	0	0	0	0	0	0	0	0	0	0	0	0	0
4719	0	0	0	0	0	0	0	0	0	0	0	0	0	0	0	0	0	0	0	0	0	0	0	0	0	0	0	0	0	0	0	0	0	2	0	0	0	0	0	27	122	0	0	0	0	0	0	0	0
4745	0	0	0	0	0	0	0	0	0	0	0	0	0	0	0	0	0	0	0	0	0	0	0	4	1	3	0	4	1	0	1	0	0	0	0	0	0	0	0	0	0	0	0	0	0	8	0	1	0
4750	0	0	0	0	0	0	0	0	0	0	0	0	0	0	0	0	0	2	3	0	0	0	0	0	0	0	0	0	0	0	0	0	0	0	0	0	0	0	0	0	0	0	0	0	0	0	0	0	0
4779	0	0	0	7	2	19	21	8	10	3	0	1	13	0	0	0	0	0	0	0	0	0	0	0	0	0	0	0	0	0	0	0	0	0	3	2	5	1	0	0	0	0	2	0	2	1	2	0	0
4846	0	0	0	0	0	0	0	0	0	3	0	0	0	0	0	0	0	0	0	0	0	0	0	0	0	0	0	0	0	0	0	0	0	0	0	0	0	0	0	0	0	112	242	396	0	0	0	0	0
4864	0	0	0	0	0	0	0	0	0	0	0	0	0	0	0	0	0	0	0	0	0	0	0	0	0	0	0	0	0	0	0	0	0	0	0	0	0	0	0	0	0	0	0	0	0	0	0	0	0
4902	0	0	0	0	0	0	0	0	0	0	0	0	0	0	0	0	0	0	0	0	0	0	0	0	0	0	0	0	0	1	1	0	2	0	2	0	0	117	0	0	0	1	0	1	0	27	0	6	17
4984	0	0	0	0	0	1	7	3	1	0	0	0	0	0	0	3	24	1	3	0	8	0	9	0	0	0	0	1	0	0	0	0	0	0	0	0	0	0	0	0	0	0	0	0	0	0	0	1	0
4993	347	1338	441	85	0	0	0	2	13	6	5	107	0	844	599	0	0	166	600	0	0	0	58	4	0	0	0	0	0	554	1710	22	97	124	343	440	273	574	199	0	0	98	43	98	47	40	54	7	184
5007	53	15	23	5	0	0	0	8	16	0	1	16	0	72	35	0	0	28	114	0	0	0	4	2	0	0	0	0	0	241	55	0	13	14	48	109	39	24	10	0	0	0	0	1	147	88	98	48	38
5017	0	0	0	0	0	0	0	0	4	0	0	0	0	0	0	5	1	1	13	0	28	6	0	10	1	19	0	3	22	0	0	0	0	0	0	0	0	0	0	0	0	0	0	0	0	0	0	0	0
5052	3	0	5	2	0	0	0	9	1	17	13	0	0	22	17	0	0	277	880	1	0	0	59	37	0	3	0	0	0	0	0	0	0	0	0	0	0	1	0	0	0	0	1	3	1	2	1	0	0
5075	0	0	2	0	0	0	0	0	0	3	34	4	0	3	5	0	0	3	10	0	0	0	16	0	0	0	0	0	0	0	0	13	5	3	0	0	0	1	0	0	0	0	2	0	1	0	0	0	2
5079	53	9	12	5	0	0	0	0	0	11	7	9	0	14	36	0	0	0	0	0	0	0	48	0	0	0	0	0	0	30	61	9	128	199	255	97	171	29	17	0	3	5	8	2	18	16	15	17	87
5168	12	1	3	0	0	0	0	0	0	5	19	7	0	27	55	0	0	0	0	0	0	0	444	0	0	0	0	0	0	0	3	17	5	9	0	1	0	0	0	0	1	25	19	4	0	1	1	0	1
5207	0	0	0	0	0	0	0	0	0	1	0	4	0	0	1	0	0	0	0	0	0	0	5	0	0	0	0	0	0	2	0	0	0	2	1	17	3	0	1	0	0	0	0	0	15	3	1	6	5
5258	0	0	0	0	142	6	15	0	0	0	0	0	1	0	0	0	0	0	0	0	0	0	0	0	0	0	0	0	0	0	0	0	0	0	0	0	0	0	0	0	0	0	0	0	0	0	0	0	0
5298	0	0	0	0	0	0	0	0	0	0	0	0	0	0	0	0	0	0	0	0	5	279	0	0	0	0	0	0	0	0	0	0	0	0	0	0	0	0	0	0	0	0	0	0	0	1	0	0	1
5312	4	0	0	0	0	0	0	0	0	14	59	7	0	0	0	0	0	0	0	0	0	0	0	0	0	0	0	0	0	0	0	31	1	3	0	0	0	0	0	0	2	8	7	4	0	0	0	0	1
5318	1	0	1	1	0	0	0	1	9	0	0	6	0	1	1	0	0	5	2	0	0	0	10	17	0	0	0	0	0	0	0	0	0	0	1	2	0	0	41	0	0	8	5	9	2	0	0	1	0
5407	0	0	0	0	0	0	0	0	0	0	0	0	0	0	0	0	0	0	0	0	0	0	0	0	0	0	0	0	0	0	0	0	0	0	0	0	0	0	0	0	0	0	0	0	0	0	0	0	0
5421	14	1	1	1	0	0	0	0	0	46	39	26	0	0	12	0	0	0	0	0	0	0	0	0	0	0	0	0	0	108	155	34	272	269	22	24	30	18	18	0	0	0	2	0	0	0	0	0	0
5445	12	2	4	9	0	0	0	5	1	4	4	21	0	9	6	0	0	14	58	0	0	0	10	4	0	0	0	0	0	3	5	0	0	0	0	5	2	3	3	0	0	2	1	3	0	0	0	0	0
5501	0	0	0	0	0	0	0	0	0	26	21	0	0	0	0	0	0	0	0	0	0	0	3	0	0	0	0	0	0	0	0	1	0	0	0	0	0	0	0	0	0	0	0	0	0	0	0	0	0
5526	2	4	2	1	0	0	0	1	2	0	0	1	0	2	0	0	0	68	89	0	0	0	0	6	0	0	0	0	0	0	1	0	4	2	0	0	1	1	0	0	0	0	0	0	1	2	5	2	3
5536	0	0	0	0	0	0	0	0	0	0	0	0	0	0	0	0	0	0	0	0	0	0	0	0	0	0	0	0	0	0	0	0	0	0	0	0	0	0	0	0	0	29	5	16	0	0	0	0	0
5555	0	0	0	1	0	0	2	0	0	0	0	0	1	0	0	30	14	10	167	5	50	29	15	150	19	85	0	5	14	0	0	0	0	0	0	0	1	0	0	0	0	0	0	0	0	0	0	0	0
5562	0	0	0	0	0	0	0	0	0	0	0	0	0	0	0	5	0	14	27	1	53	1080	26	79	0	0	0	0	0	0	0	0	0	0	0	0	0	0	0	0	0	0	0	0	0	0	0	0	0
5578	0	0	0	0	0	0	0	0	0	0	0	0	0	0	0	0	111	0	0	0	0	0	0	0	0	0	0	0	0	0	0	0	0	0	0	0	0	0	0	0	0	0	0	0	0	0	1	0	0
5583	0	0	1	2	0	0	0	0	0	0	0	0	47	0	0	0	0	0	0	0	0	0	0	0	0	0	0	0	0	0	0	0	0	0	0	0	0	0	0	0	0	0	0	0	0	0	0	0	0
5605	0	0	0	0	0	0	0	0	0	0	0	0	0	0	0	0	0	2	0	0	0	10	0	0	0	0	0	0	0	0	0	1	3	1	0	0	0	13	2	0	0	1	0	0	0	3	0	2	0
5622	0	0	0	0	0	0	0	0	0	0	0	0	0	0	0	0	0	0	0	0	0	0	0	0	0	0	0	0	0	0	0	0	0	0	27	23	55	0	7	0	0	0	0	0	126	16	121	68	0
5635	0	0	0	0	0	0	0	0	0	0	0	0	0	0	0	0	0	0	0	0	0	0	0	0	0	0	0	0	0	3	7	0	0	0	6	3	5	23	0	0	0	5	18	6	0	2	0	0	0
5638	0	0	0	0	0	0	0	0	0	0	0	26	0	0	0	0	0	0	0	0	0	0	0	0	0	0	0	0	0	7	6	4	5	3	1	2	0	2	0	0	0	0	0	0	0	0	0	0	0
5669	0	0	0	16	0	127	134	0	0	0	0	0	0	1	0	1	91	0	0	0	62	0	0	0	0	0	0	0	0	2	4	0	0	0	0	0	0	1	0	0	0	22	8	6	3	0	2	2	5
5679	0	0	0	0	0	0	0	0	0	0	0	0	0	0	0	0	0	15	42	1	0	0	0	0	0	0	0	0	0	0	0	0	0	0	0	0	0	0	0	0	0	0	0	0	0	0	0	0	0
5681	0	0	0	0	0	0	0	0	0	0	0	0	0	0	0	0	0	0	0	0	0	0	0	0	0	0	0	0	0	0	0	0	0	0	0	0	0	0	0	0	0	0	0	0	0	0	0	0	0
5717	0	0	0	0	0	3	0	1	1	0	0	0	0	0	0	0	0	0	0	0	0	0	0	0	0	0	0	0	0	0	0	0	0	0	0	0	0	0	0	0	0	1	0	0	0	4	0	1	1
5720	0	0	0	0	0	0	0	0	0	0	0	0	0	0	0	0	0	0	0	0	0	0	0	0	0	0	0	0	0	0	0	0	0	0	0	0	0	0	0	0	0	0	0	0	0	0	0	0	0
5722	0	0	0	6	0	0	0	1	0	0	0	0	0	0	0	0	33	42	10	0	157	5	775	36	88	0	0	154	5	0	0	0	0	0	0	0	0	0	0	0	0	0	0	0	0	0	0	0	0
5729	0	0	0	0	0	0	0	0	0	0	0	0	0	0	0	0	0	0	8	1	0	0	0	0	0	1	0	0	1	0	0	0	0	0	0	1	2	0	0	0	0	0	0	0	0	0	0	0	0
5746	5	3	5	0	0	0	0	1	0	1	0	0	0	1	0	0	0	22	52	0	0	0	18	9	0	0	0	0	0	0	1	0	0	0	4	2	5	1	1	0	3	0	0	0	3	14	5	4	53
5797	0	0	0	0	0	0	0	0	0	0	0	0	0	0	0	0	0	0	0	0	0	0	0	0	0	0	0	0	0	0	0	0	0	0	0	0	0	0	0	0	0	23	10	20	0	0	0	0	0
5817	0	0	0	0	0	0	0	0	0	0	0	0	0	0	0	0	2	4	1	0	3	5	12	7	4	7	0	6	6	0	0	0	0	0	0	0	0	1	0	0	0	0	0	0	0	0	0	0	0
5861	0	0	0	0	0	0	0	0	0	0	0	0	0	0	0	0	0	0	0	0	0	39	0	0	1	0	0	0	2	0	0	0	0	0	0	0	0	0	0	0	0	0	0	0	0	0	0	0	0
5942	0	0	0	0	0	0	0	0	0	0	0	0	0	0	0	0	0	0	1	0	0	6	0	4	1	17	2	0	0	0	0	0	0	0	0	0	0	0	0	0	0	0	0	0	0	0	0	0	0
5946	0	0	0	0	0	0	0	0	1	0	0	0	0	0	0	0	1	0	0	0	0	0	0	1	1	90	0	0	5	0	0	0	0	0	0	0	0	0	0	0	0	0	0	0	0	0	0	0	0
5987	35	29	1	38	0	0	0	20	7	0	0	0	0	82	5	0	2	2	80	0	0	0	2	27	0	0	0	0	0	2	2	4	11	4	1	3	2	0	0	0	0	3	1	7	0	8	3	0	11
6003	0	0	0	0	0	0	0	0	0	0	0	0	0	0	0	4	11	0	0	0	17	61	0	1	0	0	0	0	0	0	0	0	0	0	0	0	0	0	0	0	0	0	0	0	0	0	0	0	0
6048	0	0	0	0	0	4	3	0	0	0	0	0	0	0	0	0	0	0	0	0	0	8	0	0	1	0	1	1	1	0	0	0	0	0	0	0	0	0	0	0	0	0	2	0	2	0	1	2	2
6065	0	0	0	0	0	0	0	0	0	0	0	0	0	0	0	2	0	0	0	0	0	0	15	0	0	0	0	0	0	0	0	0	0	0	0	0	0	0	0	0	0	0	0	0	0	0	0	0	0
6124	0	0	0	0	0	0	0	0	0	0	0	0	0	0	0	5	0	0	185	4	0	0	5	20	0	0	0	0	0	0	0	0	0	0	0	0	0	0	0	0	0	0	0	0	0	0	0	0	0
6142	0	0	0	0	0	0	0	0	0	151	12	0	0	0	0	0	0	0	0	0	0	0	1	0	0	0	0	0	0	0	0	0	2	1	0	0	0	0	0	0	0	0	0	0	0	0	0	0	0
6146	0	0	0	0	0	0	0	0	0	0	0	0	0	0	0	0	0	0	0	0	0	0	0	0	0	0	0	0	0	0	0	0	0	0	0	0	0	0	0	0	0	0	0	0	0	0	0	0	0
6176	0	0	0	0	0	0	0	0	0	0	0	0	0	0	0	0	1	0	0	0	51	231	0	0	0	0	0	0	0	0	0	0	0	0	0	0	0	0	0	0	0	0	0	0	0	0	0	0	0
6262	66	2	1	3	0	0	0	0	0	2	3	14	0	1	9	0	0	0	18	0	0	0	3	0	0	0	0	0	0	6	7	0	3	0	11	59	11	135	10	0	0	0	1	0	56	11	9	46	19
6310	0	0	0	0	0	0	0	0	0	0	0	0	0	0	0	2	34	75	44	0	96	0	4	4	170	57	6	72	5	0	0	0	0	0	0	0	0	0	0	0	0	0	0	0	18	8	15	11	0
6387	1	0	0	14	3	1	0	4	27	0	0	0	0	0	0	0	0	0	0	0	0	0	0	0	0	0	0	0	0	0	0	0	0	0	0	0	0	0	0	0	0	0	0	0	0	0	0	0	0
6400	0	0	0	0	0	0	0	0	0	0	0	0	0	0	0	0	0	0	0	0	0	0	0	0	0	0	0	0	0	0	0	0	0	0	0	0	0	0	0	0	0	0	0	0	7	0	20	17	0
6427	0	0	0	0	0	0	0	0	0	0	0	0	0	0	0	0	0	0	0	2	7	3	6	5	4	0	0	8	14	0	0	0	0	0	0	0	1	0	0	0	0	0	0	0	0	0	0	0	0
6436	0	0	0	0	0	0	0	0	0	0	0	0	0	0	0	0	46	0	0	0	0	0	0	0	0	0	0	0	0	0	0	0	0	0	0	0	0	0	0	0	0	0	2	0	0	0	0	0	0
6510	0	0	0	0	4	0	0	9	3	1	1	0	0	0	0	0	0	0	0	0	0	0	1	0	0	0	0	6	1	0	0	0	0	0	0	0	0	0	0	0	0	3	2	1	39	2	45	60	0
6517	0	0	0	0	0	0	0	0	0	0	0	0	0	0	0	0	0	0	0	0	0	0	0	0	0	0	0	0	0	0	0	0	0	0	13	6	11	19	2	0	0	4	5	3	0	0	0	0	0
6548	0	0	0	0	0	0	0	0	0	0	0	0	0	0	0	0	0	2	17	6	2	1	0	3	1	2	0	0	0	0	0	0	0	0	0	0	0	0	0	0	0	0	0	0	0	0	0	0	0
6565	0	0	0	0	0	0	0	0	0	0	0	0	0	0	0	0	0	0	0	0	0	0	0	0	0	0	0	0	0	0	0	2	4	0	30	26	58	9	0	0	0	17	12	18	1	0	1	3	0
6588	0	0	0	0	0	0	0	0	0	0	0	0	0	0	0	0	0	0	0	0	0	0	29	3	8	1	0	1	1	0	0	0	0	0	0	0	0	0	0	0	0	0	0	0	0	0	0	0	0
6607	0	0	0	0	137	0	2	1	3	0	0	0	3	0	0	0	0	0	0	2	0	0	0	0	0	0	0	0	0	0	0	0	0	0	0	0	0	0	0	0	0	0	0	0	0	0	0	0	0
6614	0	0	0	0	0	0	0	0	0	0	0	0	0	0	0	1	0	1	0	0	6	63	5	3	0	0	0	0	0	0	0	0	0	0	0	0	0	0	0	0	0	0	0	0	0	0	0	0	0
6621	0	0	1	0	51	5	24	3	15	0	0	0	7	0	0	2	11	0	0	0	0	0	0	0	0	0	0	0	0	0	0	0	0	0	0	0	0	0	0	0	0	0	0	0	0	0	0	0	0
6659	0	0	0	0	0	0	0	0	0	0	0	0	0	0	0	0	0	0	0	0	0	0	0	0	0	0	0	0	0	0	0	0	0	1	0	0	0	0	0	0	0	9	15	7	8	4	6	5	0
6685	0	0	0	0	0	0	0	0	0	0	0	0	0	0	0	0	0	0	0	0	0	0	0	0	0	0	0	0	0	0	0	0	0	0	0	0	0	0	0	0	0	0	0	0	0	0	0	0	0
6715	0	0	0	0	0	0	0	0	0	64	5	0	0	0	0	0	0	0	0	0	0	0	0	0	0	0	0	0	0	0	0	8	0	0	0	0	0	0	0	0	0	0	0	0	0	0	0	0	0
6736	0	0	0	0	0	0	0	0	0	0	0	0	0	0	0	0	0	0	0	0	0	0	0	0	0	0	0	0	0	0	0	0	0	0	0	0	0	0	0	0	0	19	86	28	0	0	1	0	2
6764	0	0	0	0	0	0	0	12	0	0	0	0	0	0	0	66	0	0	0	0	23	0	23	27	34	6	0	0	0	0	0	0	0	0	0	0	0	42	0	0	0	0	0	0	0	0	0	0	0
6769	0	0	0	0	0	0	0	0	0	0	0	0	0	0	0	0	0	0	0	0	0	0	0	0	1	1	0	0	1	0	0	0	0	0	0	0	0	0	0	0	0	16	29	36	4	2	6	3	2
6778	0	0	0	0	0	0	0	0	0	0	0	0	0	0	0	0	0	0	0	0	0	0	2	0	0	0	0	0	0	0	0	0	0	0	0	0	0	0	0	0	0	0	0	0	0	0	0	0	0
6803	0	0	0	0	190	2	3	1	11	0	0	0	2	0	0	0	0	0	0	0	0	0	0	0	0	0	0	0	0	0	0	0	1	0	0	0	0	0	0	0	0	0	0	0	0	0	0	0	0
6853	0	0	0	0	0	0	1	0	1	0	0	0	46	0	0	0	0	0	0	0	0	0	0	0	0	2	0	0	0	0	0	0	0	0	0	0	0	0	0	0	0	0	0	0	0	0	0	0	0
6862	0	0	0	0	0	0	0	1	0	0	0	0	0	1	0	0	0	5	3	0	0	2	0	0	0	0	0	0	0	0	0	0	3	0	0	0	0	0	0	0	0	0	0	0	0	0	0	0	0
6874	0	0	0	0	0	0	0	0	0	0	0	0	0	0	0	50	0	72	401	8	4	51	80	153	0	0	0	0	0	0	0	0	0	0	0	0	0	0	0	0	0	0	0	0	0	0	0	0	0
6889	0	0	0	0	0	0	0	0	0	0	0	0	0	0	0	0	0	0	0	0	0	0	0	0	6	20	2	102	8	0	0	0	0	0	0	0	0	0	0	0	0	0	0	0	3	1	4	66	0
6911	0	0	0	0	0	0	0	0	0	0	0	0	0	0	0	0	0	8	0	0	0	1	0	1	0	0	0	0	0	0	0	2	0	0	0	0	0	0	0	0	0	0	0	0	0	0	0	0	0
6947	0	0	0	0	0	0	0	0	0	0	0	0	0	0	0	2	14	0	0	0	0	62	15	4	0	0	0	0	0	0	0	0	0	0	0	0	0	0	0	0	0	0	0	0	0	0	0	0	0
6980	0	0	0	0	0	0	0	0	0	0	0	0	0	0	0	0	0	0	0	0	0	0	0	0	0	0	0	0	0	0	0	0	0	0	0	0	0	0	0	0	0	0	0	0	0	0	0	0	0
6996	0	0	0	0	0	0	0	0	0	0	0	0	0	0	0	0	0	0	1	0	0	1	1	1	3	11	0	0	2	0	0	0	0	0	0	0	0	0	0	0	0	0	0	0	0	0	0	0	0
7023	0	0	0	0	0	1	1	0	0	0	0	0	108	0	0	0	0	0	0	0	0	0	0	0	0	0	0	0	0	0	0	0	0	0	0	0	0	0	0	0	0	0	0	0	0	0	0	0	0
7040	0	0	0	0	0	0	0	0	0	0	0	0	0	0	0	0	0	0	1	0	1	82	0	0	0	0	0	2	0	0	0	0	0	0	0	0	0	0	0	0	0	0	0	0	0	0	0	0	0
7096	0	1	0	0	80	2	12	3	4	0	0	0	64	0	0	20	3	21	121	26	1	7	3	8	2	3	1	0	8	1	0	0	0	0	8	9	16	1	0	0	0	1	3	0	0	0	0	0	0
7101	0	0	0	0	0	0	0	0	0	0	0	0	0	0	0	0	0	0	0	0	0	0	0	0	56	136	149	570	226	0	0	0	0	0	0	0	0	0	0	0	0	0	0	0	0	0	0	0	0
7105	0	0	0	1	0	0	0	0	0	0	0	0	0	3	0	6	1	70	10	0	0	0	1	29	0	0	0	0	0	0	0	0	0	0	0	0	0	0	0	0	0	0	0	0	0	0	0	0	0
7112	4	13	10	10	170	11	23	8	10	0	0	0	120	0	0	0	0	0	3	0	0	0	0	2	0	0	0	0	0	1	1	0	0	0	1	0	2	0	2	0	0	0	1	3	0	21	0	3	15
7128	2	0	0	0	0	0	0	0	0	8	0	0	0	0	0	0	0	0	0	0	0	0	0	0	0	0	0	0	0	0	0	1	4	0	0	0	0	0	0	0	0	43	4	7	0	0	0	0	0
7137	0	0	0	0	0	1	2	0	0	0	0	0	0	0	0	1	131	1	21	1	1	105	1	3	0	12	15	90	88	0	0	0	0	0	0	0	0	0	0	0	0	0	0	0	10	59	4	10	35
7150	0	0	0	0	0	0	0	0	0	4	3	0	0	0	2	0	0	0	0	0	0	0	0	0	0	0	0	0	0	3	19	39	20	20	10	4	2	12	5	0	0	0	0	0	0	0	0	0	0
7157	0	0	0	0	0	0	0	0	0	0	0	0	0	0	0	0	0	0	0	0	0	0	0	0	0	0	0	0	0	0	0	0	0	0	0	0	0	0	0	37	15	0	0	0	0	0	0	0	0
7158	0	0	0	0	0	0	0	0	0	0	0	0	0	0	0	0	0	0	0	0	0	1	0	0	0	0	0	0	0	0	0	0	0	0	0	0	0	0	0	0	0	0	0	0	0	0	1	0	0
7187	0	0	0	0	0	0	0	0	0	0	0	0	0	0	0	0	0	5	20	0	3	0	2	0	0	0	0	0	0	0	0	0	0	0	0	0	0	0	0	0	0	0	0	0	0	0	0	0	0
7225	0	0	0	0	0	18	18	1	0	0	0	0	0	0	0	7	22	5	1	0	75	252	59	8	151	38	20	37	47	0	0	0	0	0	0	0	0	2	1	0	0	0	0	0	0	0	0	0	0
7268	0	0	0	0	0	0	0	0	0	0	0	0	0	0	0	0	188	0	0	0	0	0	3	0	0	0	0	2	0	0	0	0	0	0	0	0	0	0	0	0	0	0	0	0	0	0	0	0	0
7295	0	18	6	0	17	51	141	29	0	4	0	1	1949	11	0	0	1	0	79	255	2	10	34	0	0	0	1	0	0	1	2	0	0	1	1	0	0	467	14	0	0	26	18	17	58	13	39	15	0
7300	0	0	0	1	0	0	0	0	1	0	0	0	0	0	0	0	1	1	26	8	0	0	0	0	6	0	0	7	6	0	0	0	0	0	0	0	0	0	0	0	0	0	0	0	4	0	4	1	0
7312	0	0	0	0	1	0	0	0	0	0	0	0	72	1	0	0	0	1	1	0	0	0	0	0	0	0	0	22	0	0	0	0	0	1	0	0	0	2	3	0	0	0	0	0	1	0	1	1	0
7344	0	0	0	0	0	1	0	0	0	0	0	0	13	0	0	0	0	13	121	37	0	0	0	0	0	0	0	0	0	0	0	0	0	0	0	0	0	0	0	0	0	0	0	0	0	0	0	0	0
7366	0	0	0	0	0	0	0	0	0	1	89	0	0	0	0	0	0	0	0	0	0	0	0	0	0	0	0	0	0	0	0	0	0	0	0	1	0	0	0	0	0	0	0	1	0	0	0	0	0
7368	0	0	0	0	0	0	0	0	0	0	0	0	0	0	0	2	0	0	3	0	0	0	0	0	6	0	0	20	6	0	0	0	0	0	0	0	0	0	0	0	0	0	0	0	0	0	0	0	0
7376	0	0	0	0	0	0	0	0	0	0	0	0	0	0	0	0	0	0	0	0	10	142	2	1	0	0	0	0	0	0	0	0	0	0	0	0	0	0	0	0	0	0	0	0	0	0	0	0	0
7391	0	0	0	0	0	0	0	0	0	0	0	0	0	0	0	0	0	0	0	0	0	0	0	0	0	0	0	0	0	0	0	0	13	0	0	0	0	0	0	0	0	28	16	24	1	2	2	10	3
7405	0	0	0	0	0	0	0	0	0	0	0	0	0	0	0	1	0	0	0	0	0	21	0	0	0	0	0	0	0	0	0	0	0	0	0	0	0	1	0	0	0	0	3	0	0	0	1	1	0
7427	0	0	0	0	0	0	0	0	0	0	0	0	0	0	0	0	6	0	0	0	3	0	0	1	0	0	0	0	0	0	0	0	0	0	0	0	0	0	0	0	0	0	0	0	0	0	0	0	0
7450	5	11	6	4	8	62	45	172	22	0	0	1	1	0	0	0	0	0	0	0	0	0	0	0	0	0	0	0	0	0	0	0	0	0	0	0	0	0	0	0	0	0	0	0	0	0	0	0	0
7508	0	0	0	0	0	0	0	0	0	0	0	0	1	0	0	0	0	0	0	0	0	0	0	0	2	1	8	27	47	0	0	0	0	0	0	0	1	0	0	0	0	0	0	0	0	0	0	0	0
7530	16	31	2	1	0	0	0	0	0	0	0	1	0	18	0	0	0	17	15	0	0	0	5	10	0	0	0	0	0	0	1	0	0	0	0	0	0	2	0	0	0	0	0	0	0	6	4	0	5
7538	11	0	1	0	0	0	0	0	0	0	0	5	0	0	0	0	0	1	3	0	0	0	2	0	0	0	0	0	0	0	3	0	0	1	0	13	0	21	2	0	0	0	0	0	0	0	0	0	0
7546	1	0	0	1	1	14	24	4	1	0	0	0	31	1	0	0	0	0	0	0	0	0	0	0	0	0	0	0	0	0	0	0	0	0	0	0	0	4	0	0	0	0	1	0	2	1	5	3	0
7561	0	0	0	0	0	0	0	0	0	0	0	0	0	0	0	0	128	0	0	0	0	0	0	0	0	0	0	0	0	0	0	0	0	0	0	0	0	0	0	0	0	0	0	0	0	0	0	0	0
7608	0	0	0	0	0	0	0	0	0	0	0	0	0	0	0	0	1	0	0	0	75	0	1	0	0	0	0	0	0	2	2	0	0	0	0	0	0	27	0	0	0	0	0	0	0	0	0	0	0
7614	0	0	0	0	0	0	0	0	0	0	0	0	0	0	0	0	0	5	1	0	0	1	0	5	0	0	0	0	0	0	0	0	0	0	0	0	0	0	0	0	0	0	0	0	0	0	0	0	0
7643	0	0	0	0	0	0	0	0	0	0	0	0	0	0	0	0	0	0	0	0	0	0	0	0	0	0	0	0	0	0	0	0	0	0	0	0	0	0	0	0	0	0	0	0	0	0	0	0	0
7668	0	0	0	0	0	0	0	0	0	0	0	0	1	0	0	0	0	2	12	0	0	0	0	1	2	11	0	2	19	0	0	0	0	0	0	0	0	0	0	0	0	0	0	0	0	0	0	1	0
7686	0	0	0	0	0	0	0	0	0	0	0	0	0	0	0	0	0	0	0	0	0	0	0	0	0	0	0	0	0	0	0	0	0	0	0	0	0	0	0	0	0	0	0	0	0	0	0	0	0
7739	10	14	11	21	72	0	0	566	263	0	0	0	0	0	0	0	0	0	0	0	0	0	0	0	0	0	0	0	0	0	0	0	0	0	0	0	1	0	0	0	0	0	0	0	0	0	0	0	0
7749	0	0	0	0	0	0	0	0	0	0	0	0	0	0	0	0	0	0	0	0	1	38	2	11	12	2	117	299	21	3	2	0	1	0	0	0	0	62	1	0	0	3	8	2	5	32	0	7	27
7800	0	0	19	0	9	0	0	0	0	0	0	0	0	0	0	0	0	0	0	0	0	0	0	0	0	0	0	0	0	1	1	0	0	0	0	0	0	0	0	0	0	0	0	2	269	57	55	115	50
7860	0	0	0	0	0	0	0	0	0	0	0	0	0	0	0	2	0	1	39	4	0	0	0	0	0	0	0	0	0	0	0	0	0	0	0	0	0	0	0	0	0	0	0	0	0	0	0	0	0
7865	0	0	0	0	0	11	11	0	0	0	0	0	0	0	0	0	7	0	0	0	1	0	0	0	19	0	4	7	0	1	0	0	0	0	0	0	0	2	1	0	0	1	3	0	7	4	3	2	3
7918	0	0	0	0	0	0	0	0	0	0	0	0	0	0	0	0	0	0	0	0	0	0	0	0	0	0	0	0	0	0	0	0	0	0	0	0	0	0	0	0	0	0	0	0	0	0	0	0	0
7927	0	0	0	0	0	0	0	0	0	0	0	0	0	0	0	0	35	0	0	0	0	3	0	0	0	0	0	0	0	0	0	0	0	0	0	0	0	0	0	0	0	0	0	0	0	0	0	0	0
7943	0	0	0	0	0	0	0	0	0	0	0	0	0	0	0	0	0	0	9	0	0	68	8	1	8	6	1	9	0	0	1	1	1	1	0	0	0	0	0	0	0	0	0	0	5	2	2	0	3
7949	0	0	0	0	0	0	0	0	0	136	324	0	0	0	0	0	0	4	4	0	0	0	0	0	0	0	0	0	0	0	0	0	2	0	0	0	0	0	0	0	0	0	1	5	0	0	0	0	0
7981	0	0	0	0	0	0	0	0	0	0	0	0	0	0	0	0	0	10	8	7	6	176	0	0	5	7	13	9	6	0	0	0	0	0	0	0	0	0	0	0	0	0	0	0	0	0	0	0	0
7984	0	0	0	0	1	0	0	1	0	0	0	0	1	0	0	12	163	4	2	0	9	14	82	36	48	10	1	13	17	0	0	0	0	0	0	0	0	0	0	0	0	0	2	0	1	4	2	1	1
7999	0	0	0	0	0	0	0	0	0	0	0	0	0	0	0	0	0	0	0	0	0	0	0	0	0	0	0	0	0	0	0	0	0	0	0	0	0	0	0	0	0	0	0	0	0	0	0	0	0
8057	5	1	1	3	0	0	0	1	0	1	1	0	0	1	0	0	0	5	12	0	0	0	0	0	0	0	0	0	0	8	11	0	1	0	4	11	2	14	0	0	0	0	0	0	0	0	0	1	3
8065	0	0	0	0	0	0	0	0	0	57	21	0	0	0	0	0	0	0	0	0	0	0	0	0	0	0	0	0	0	0	0	0	0	0	0	0	0	0	0	0	0	0	0	0	0	0	0	0	0
8078	36	22	56	4	0	0	0	0	0	38	36	93	0	18	33	0	0	0	6	0	0	0	109	0	0	0	0	0	0	20	30	5	15	14	17	72	3	5	10	0	0	0	0	0	0	0	0	0	17
8107	0	0	0	0	0	0	0	0	0	31	26	0	0	0	0	0	0	0	0	0	0	0	0	0	0	0	0	0	0	0	0	2	0	0	0	0	0	0	0	0	0	0	0	0	0	0	0	0	0
8117	0	0	0	0	1	0	0	0	0	0	0	0	0	0	0	1	0	0	0	0	0	0	0	1	0	11	0	0	40	0	0	0	0	0	0	0	0	0	0	0	0	0	0	0	0	0	0	0	0
8142	0	0	0	2	0	11	9	9	9	0	0	0	31	0	0	0	0	0	0	0	0	0	0	0	0	0	0	0	0	0	0	0	0	0	0	0	1	0	0	0	0	0	0	1	2	0	1	0	0
8214	0	0	0	0	0	0	0	0	0	0	0	0	0	0	0	5	0	0	2	0	1	3	0	3	3	1	0	0	0	0	0	0	0	0	0	0	1	0	0	0	0	0	0	0	0	0	3	1	0
8241	0	0	0	0	0	0	0	0	0	0	0	0	0	0	0	0	0	0	6	1	0	0	0	1	0	9	0	0	0	0	0	0	0	0	0	0	0	0	0	0	0	0	0	0	0	0	0	0	0
8255	6	0	2	8	0	0	0	0	0	2	1	6	0	5	9	0	0	68	68	0	0	0	7	0	0	0	0	0	0	5	2	0	0	0	3	1	0	3	0	0	0	0	0	0	0	0	0	0	2
8278	0	0	0	2	87	1	4	1	3	0	0	0	10	0	0	22	27	4	54	0	1	0	4	49	127	160	0	131	20	0	0	0	0	0	0	0	0	0	0	0	0	0	0	0	1	2	8	1	0
8292	1	4	1	0	0	0	0	0	0	0	1	0	0	4	5	0	0	9	21	0	0	0	1	1	0	0	0	0	0	2	1	0	1	0	1	1	1	9	0	0	0	0	3	0	0	0	2	0	1
8373	0	0	0	0	0	0	0	0	0	3	1	0	0	0	0	0	0	0	0	0	0	0	0	0	0	0	0	0	0	0	0	0	1	8	0	0	0	0	0	0	0	18	22	8	5	2	14	2	10
8415	0	0	0	0	0	0	0	0	0	0	0	0	0	0	0	0	0	0	0	0	0	0	0	0	0	1	0	0	0	0	0	0	0	0	0	0	0	0	0	0	0	0	0	0	0	0	0	0	0
8455	0	0	0	5	0	7	9	17	2	0	0	0	1	0	0	4	0	0	0	1	0	14	11	5	1	0	0	0	0	3	0	0	0	0	0	0	0	5	0	0	0	0	0	0	0	0	0	0	0
8485	0	0	0	0	0	0	0	0	0	0	0	0	0	0	0	0	0	0	0	0	0	0	0	0	9	24	0	56	1	0	0	0	0	0	0	0	0	0	0	0	0	0	0	0	0	0	0	0	0
8493	0	0	0	0	0	0	0	0	0	0	0	0	0	0	0	0	0	0	0	0	0	0	0	0	0	0	0	0	0	0	0	110	1	2	0	0	0	0	0	0	0	0	0	0	0	0	0	0	0
8541	0	0	0	0	0	0	0	0	0	0	1	1	0	38	32	0	0	61	48	0	0	0	34	0	0	0	0	0	0	0	0	0	1	0	0	0	0	1	1	0	0	2	2	0	0	1	3	0	0
8551	0	0	0	0	0	0	0	0	0	0	0	0	0	0	5	0	8	0	1	0	13	567	0	0	0	0	1	0	3	0	0	0	0	0	0	0	0	0	0	0	0	0	0	0	1	3	0	2	1
8639	0	0	0	0	0	0	0	0	0	34	15	0	0	0	0	0	0	0	0	0	0	0	0	0	0	0	0	0	0	0	0	19	0	0	0	0	0	0	0	0	0	2	0	2	0	0	0	0	0
8716	0	2	0	0	19	89	74	0	0	0	0	2	0	14	0	0	0	0	0	0	0	0	0	0	894	195	280	708	299	1	0	0	1	0	44	58	92	18	7	0	0	0	0	0	6	3	2	2	1
8720	0	0	0	0	0	0	0	0	0	0	0	0	0	0	0	1	4	0	0	0	1	0	1	0	6	1	26	16	1	0	0	0	0	0	0	0	0	0	0	0	0	0	0	0	5	0	3	0	0
8787	0	0	0	0	0	0	2	0	0	0	0	0	3	0	0	15	1	47	16	27	3	55	51	16	0	0	0	0	0	0	0	0	0	0	2	3	5	0	0	0	0	0	0	0	1	0	2	1	3
8803	0	0	0	0	0	0	0	0	0	0	0	0	0	4	5	0	0	0	0	0	0	0	0	0	0	0	0	0	0	0	0	1	0	0	2	0	0	24	18	0	0	0	0	0	0	0	0	0	0
8855	0	0	1	4	5	44	87	41	53	0	0	0	9	6	0	0	51	0	0	0	0	0	0	0	5	0	0	2	13	0	0	0	0	0	0	0	0	0	0	0	0	0	0	0	0	0	0	0	0
8871	1	0	0	0	0	0	0	0	0	2	0	9	0	9	0	0	0	0	0	0	0	0	19	0	0	0	0	0	0	0	0	0	14	5	0	0	0	0	0	0	0	6	1	0	0	0	0	0	0
8873	18	2	2	4	0	0	0	0	1	0	2	1	0	20	0	0	0	6	54	0	0	0	0	0	0	0	0	0	0	0	1	1	0	1	0	0	8	0	0	0	0	0	0	0	0	1	2	0	0
8895	0	0	0	0	0	0	0	0	0	0	0	0	0	0	0	0	0	0	0	0	0	0	0	0	0	0	0	0	0	0	0	0	0	0	0	0	0	0	0	0	0	0	0	0	0	0	0	0	0
8932	0	0	0	0	0	0	0	0	0	0	0	0	0	0	0	0	0	0	0	0	0	47	0	34	0	0	0	0	0	0	0	0	0	0	0	0	0	0	0	1	0	0	0	0	0	0	0	0	0
8936	0	0	0	0	0	0	0	0	0	0	0	0	0	0	0	0	0	0	0	0	0	0	0	0	0	0	0	0	0	0	0	0	0	0	0	0	0	0	0	0	0	0	0	0	0	0	0	0	0
8991	0	0	0	0	8	6	9	0	0	0	0	0	0	0	0	0	0	0	1	1	0	25	2	0	0	0	0	0	0	0	0	0	0	0	0	0	0	0	0	0	0	2	1	1	8	1	4	0	0
9044	0	0	0	0	0	0	0	0	0	0	0	0	0	0	0	1	0	0	2	0	1	0	0	0	0	0	0	0	0	0	0	0	0	0	0	0	0	0	0	0	0	0	0	0	0	0	0	0	0
9048	0	0	0	0	0	0	0	0	0	0	0	0	0	1	0	0	7	0	0	0	0	0	151	22	0	0	0	0	0	0	0	0	0	0	0	0	0	0	0	0	0	0	0	0	0	0	0	0	0
9058	0	0	0	0	0	0	0	0	0	3	5	0	0	0	1	0	0	0	0	0	0	0	0	0	0	0	0	0	0	0	1	90	7	2	1	0	0	0	0	0	0	0	0	0	0	0	0	0	0
9144	0	0	0	0	0	0	0	0	0	0	0	0	0	0	0	0	0	0	0	0	0	0	0	0	0	0	0	0	0	0	0	0	0	0	0	0	0	0	0	0	0	0	0	0	0	0	0	0	0
9164	0	0	0	0	0	0	0	0	0	0	0	0	0	0	0	2	0	0	0	1	0	32	0	0	2	12	1	5	45	0	0	0	0	0	0	0	0	0	0	0	0	0	0	0	0	0	0	0	0
9206	0	0	0	0	0	0	0	0	0	0	0	0	0	0	3	10	5	2	0	0	17	154	1	0	0	0	0	0	0	0	0	0	0	0	0	0	0	0	0	0	0	0	0	0	0	0	0	0	0
9218	0	0	0	0	0	0	0	0	0	0	0	0	0	0	0	0	0	0	0	0	0	0	0	0	0	0	0	0	0	0	0	0	0	0	0	0	0	0	0	0	0	0	0	0	0	0	0	0	0
9235	0	0	0	0	0	0	0	0	0	0	0	0	0	0	0	0	0	0	0	0	0	0	0	0	0	8	0	0	0	0	0	0	0	0	0	0	0	0	0	0	0	0	0	0	0	0	0	0	0
9279	0	1	1	8	36	13	64	15	61	0	0	0	103	7	0	263	3	379	5468	1015	82	134	12	17	24	143	0	135	193	0	0	0	0	0	0	0	0	0	0	0	0	0	0	0	17	54	207	116	3
9300	0	0	0	0	0	0	0	0	0	0	0	0	0	0	0	119	0	0	0	0	0	0	0	7	0	0	0	0	0	0	0	0	0	0	0	0	0	0	0	0	0	0	0	0	0	0	0	0	0
9418	3	28	3	47	0	0	0	15	31	0	1	6	0	6	7	0	0	8	15	0	0	0	0	3	0	0	0	0	0	5	2	0	4	2	7	5	3	0	0	0	0	0	2	0	64	7	21	15	5
9446	0	0	0	0	0	0	0	0	0	0	0	0	0	0	0	0	0	0	0	0	0	0	0	0	0	0	0	0	0	0	0	0	0	0	0	0	0	0	0	0	0	0	0	0	0	0	0	0	0
9470	0	0	0	0	0	0	0	0	0	0	0	0	0	0	1	0	0	2	1	10	0	0	17	1	0	0	0	0	0	0	0	0	0	0	0	0	0	0	0	0	0	0	0	0	0	0	0	0	0
9513	0	0	0	0	0	0	0	0	0	0	0	0	0	0	0	1	0	0	0	0	4	3	2	1	0	0	0	5	5	0	0	0	0	0	0	0	0	0	0	0	0	0	0	0	0	0	0	0	0
9620	0	0	0	0	0	0	0	0	1	0	0	0	0	0	0	0	13	0	0	0	0	134	0	0	1	5	6	1	2	0	0	1	0	0	0	0	0	11	0	0	0	0	0	0	8	0	6	14	0
9651	0	0	0	0	0	0	0	0	0	0	0	0	0	0	0	0	0	10	92	9	0	0	0	0	0	0	0	0	0	0	0	0	0	0	0	0	0	0	0	0	0	0	0	0	0	0	0	0	0
9662	0	0	0	0	0	0	0	0	0	60	41	0	0	0	0	0	0	0	0	0	0	0	2	0	0	0	0	0	0	0	0	8	0	0	0	0	0	0	0	0	0	0	0	0	0	0	0	0	0
9664	13	1	16	0	0	0	0	0	1	3	13	0	0	60	32	1	0	87	636	3	0	0	60	2	0	0	0	0	0	1	8	0	0	0	5	7	2	28	0	10	7	8	3	8	1	5	1	0	15
9682	0	0	0	0	0	0	0	0	0	0	0	0	0	0	0	5	16	8	175	5	3	26	1	6	0	0	0	0	0	0	0	0	0	0	0	0	0	0	0	0	0	0	0	0	0	0	0	0	0
9702	0	0	0	0	0	0	0	0	0	0	0	0	0	0	0	0	67	4	0	0	50	0	1	3	32	0	21	77	0	0	0	0	0	0	0	0	0	43	0	0	0	0	0	0	0	0	0	0	0
9714	0	0	0	0	0	0	0	0	0	0	0	0	0	0	0	0	0	0	0	0	0	0	0	0	0	0	0	0	0	0	0	1	0	1	0	0	0	0	0	106	135	0	0	0	0	0	0	0	0
9715	0	0	0	0	0	0	0	0	0	0	0	0	0	0	0	4	54	5	5	0	0	0	1	19	0	0	0	0	0	0	0	0	0	0	0	0	0	0	0	0	0	0	0	0	0	0	0	0	0
9728	0	0	0	0	0	0	0	0	0	0	0	0	0	0	0	0	3	0	0	0	14	18	0	0	1	0	0	104	15	0	0	0	0	0	0	0	0	0	0	0	0	0	2	0	3	1	9	18	3
9756	1	0	4	1	23	20	40	6	21	0	0	0	4	0	0	0	0	0	0	0	0	0	0	0	0	0	0	0	2	0	0	0	0	0	0	0	0	0	0	0	0	0	0	0	0	0	0	0	0
9796	0	0	0	0	0	0	0	0	0	0	0	0	0	0	0	3	0	6	10	0	30	0	0	7	0	0	0	0	0	0	0	0	0	0	0	0	0	0	0	0	0	0	0	0	0	0	0	0	0
9819	0	0	0	0	0	0	0	0	0	0	0	0	0	0	0	0	0	0	0	0	0	0	0	0	1	5	0	0	82	0	0	0	0	0	0	0	0	0	0	0	0	0	0	0	0	0	0	0	0
9854	0	0	0	0	0	0	0	0	0	0	0	0	1	0	0	14	0	1	35	25	0	0	0	0	0	0	0	0	0	0	0	0	0	0	0	0	0	0	0	0	0	0	0	0	0	0	0	0	1
9889	0	0	17	0	0	0	0	0	0	11	5	1	0	3	2	0	0	0	0	0	0	0	8	0	0	0	0	0	0	72	50	41	103	223	71	51	54	200	78	0	0	4	9	2	0	0	1	1	3
9899	0	0	0	0	0	0	0	0	0	0	0	0	0	0	0	0	0	0	0	0	0	0	0	0	0	0	0	0	0	0	0	0	0	0	0	0	0	0	0	0	0	0	0	0	0	0	0	0	0
9912	0	0	0	1	4	0	4	2	0	0	0	0	313	3	0	4	19	65	30	236	19	6	116	16	0	0	0	0	0	0	0	0	0	0	0	0	0	0	0	0	0	0	0	0	0	0	0	0	0
9925	0	0	0	0	0	0	0	0	0	0	0	0	0	0	0	0	0	0	0	0	0	0	0	0	0	0	0	2	2	1	0	0	0	0	0	0	0	0	0	0	0	0	0	0	12	0	4	5	0
9938	14	33	8	5	0	2	2	14	81	0	2	16	0	4	1	1	1	1	1	0	0	0	32	5	0	0	0	0	0	5	3	0	0	0	336	80	606	0	6	4	10	30	11	16	29	18	35	49	13
9953	0	0	0	0	0	0	0	0	0	0	0	0	0	0	0	0	0	0	0	0	3	20	10	3	0	2	0	1	0	0	0	0	0	0	0	0	0	0	0	0	0	0	0	0	0	0	0	0	0
9961	0	0	0	0	0	0	0	0	0	0	0	0	0	0	0	1	6	0	1	0	2	0	0	1	0	1	2	5	4	0	0	0	0	0	0	0	0	0	0	0	0	0	0	0	0	0	0	0	0
9962	0	0	0	0	0	0	0	0	0	0	0	0	0	0	0	2	0	12	6	12	2	124	6	16	0	0	0	0	5	0	0	0	0	0	0	0	0	0	0	0	0	0	0	0	7	6	2	7	4
10003	9	0	1	0	0	0	0	0	0	0	0	0	0	0	0	0	0	11	18	0	0	0	2	0	0	0	0	0	0	0	0	0	0	0	0	0	1	0	0	60	92	1137	800	1511	0	0	0	0	0
10064	0	0	0	0	0	0	0	0	0	0	0	0	0	0	0	0	2	19	47	0	3	0	0	0	0	0	0	0	0	0	0	0	0	0	0	0	0	0	0	0	0	0	0	0	0	2	0	0	0
10073	3	9	2	23	21	29	22	38	6	0	0	0	9	0	0	0	0	0	0	0	0	0	0	0	0	0	0	0	0	0	0	0	0	0	0	0	0	0	0	0	0	24	51	22	95	144	91	135	63
10085	0	0	0	0	0	0	0	0	0	0	0	0	0	0	0	3	0	0	0	0	0	0	16	3	1	213	6	28	62	0	0	0	0	0	0	0	0	0	0	0	0	0	0	0	0	0	0	0	0
10095	0	0	0	0	0	0	0	0	0	3	57	0	0	0	0	0	0	0	0	0	0	0	1	0	0	0	0	0	0	0	0	0	0	0	0	0	0	0	0	0	0	0	0	0	0	0	0	0	0
10098	0	0	0	0	0	0	0	0	0	0	0	0	0	0	0	0	0	0	4	0	12	0	17	29	6	0	0	0	0	0	0	0	0	0	0	0	0	0	0	0	0	0	1	1	0	0	0	0	0
10099	28	17	3	46	0	125	138	23	0	0	0	0	86	0	3	0	0	0	0	0	0	0	0	0	0	0	0	0	0	0	0	0	0	0	0	0	0	0	0	0	0	0	0	0	0	0	0	0	0
10207	0	0	0	0	0	0	0	0	0	0	0	0	0	0	0	0	3	1	0	0	2	36	1	0	0	0	1	11	1	0	0	0	0	0	0	0	0	0	0	0	0	0	0	0	0	0	0	0	0
10265	0	0	0	0	0	0	0	0	0	0	0	1	0	0	0	1	0	1	4	1	1	8	2	3	0	2	0	0	0	0	0	0	0	0	0	0	0	2	0	0	0	0	0	0	0	2	0	0	1
10295	0	0	0	0	0	0	0	0	0	0	0	0	0	0	0	0	0	0	0	0	0	0	0	0	0	0	0	1	0	0	0	0	0	0	0	0	0	0	0	0	0	0	0	0	0	0	0	0	0
10298	0	0	0	0	0	0	0	0	0	0	0	0	4	0	0	0	0	2	0	8	0	0	0	0	7	21	0	0	0	0	0	0	0	0	0	0	0	0	0	0	0	0	0	0	0	0	0	0	0
10323	0	0	0	2	0	0	3	0	3	0	0	0	0	0	0	5	0	0	0	0	0	0	27	3	0	0	0	0	23	0	0	0	0	0	0	0	0	0	0	0	0	0	0	0	0	0	0	1	0
10331	0	0	0	0	0	0	0	0	0	0	0	0	0	0	0	0	8	0	3	3	1	7	1	0	1	0	0	6	1	0	0	0	0	0	0	0	0	0	0	0	1	0	0	0	4	2	13	28	0
10381	0	2	0	7	28	32	134	24	59	0	0	0	23	0	0	0	0	0	0	0	0	0	0	0	0	0	0	0	0	0	0	0	0	0	0	0	0	0	0	0	0	0	0	0	0	0	0	0	0
10429	0	0	0	0	0	0	0	0	0	0	0	0	0	0	0	0	0	2	6	0	0	0	0	1	1	1	0	0	1	0	0	0	0	0	0	0	1	0	0	0	0	0	0	0	0	0	0	0	0
10470	0	0	0	0	0	6	2	3	0	0	0	0	1	0	0	0	0	0	0	0	0	0	0	0	0	0	0	0	0	0	0	0	0	0	2	1	2	4	0	0	0	0	2	0	14	4	5	14	0
10631	0	0	0	0	0	0	0	0	0	0	0	0	0	0	0	0	0	0	0	0	0	0	0	0	0	0	0	0	0	0	0	0	0	0	0	0	0	0	0	0	0	0	0	0	0	0	0	0	0
10641	0	0	0	0	0	0	0	0	0	0	0	0	0	0	0	0	0	0	2	0	32	559	0	0	0	0	0	0	0	0	0	0	0	0	0	0	0	0	0	0	0	0	0	0	0	0	0	0	0
10650	0	0	0	0	0	0	0	0	0	0	0	0	0	0	0	0	0	0	0	0	11	66	0	0	0	0	0	0	0	0	0	0	0	0	0	0	0	0	0	0	0	0	0	0	0	0	0	0	0
10662	1	1	1	3	0	0	0	6	4	0	0	0	0	2	0	0	0	14	42	0	0	0	1	1	0	0	0	0	0	0	0	0	0	0	0	0	0	0	0	0	0	0	0	0	1	4	3	0	3
10692	0	0	0	0	0	0	0	0	0	0	0	0	0	0	0	0	23	12	0	0	0	0	0	0	6	0	1	1	2	0	0	0	0	0	0	0	0	0	0	0	0	0	0	0	0	1	2	1	0
10729	0	0	0	0	0	0	0	0	0	0	0	0	0	0	0	0	0	0	0	0	9	0	0	0	0	0	0	0	0	0	0	0	0	0	0	0	0	0	0	0	0	0	0	0	0	0	0	0	0
10757	0	0	0	0	1	0	0	2	2	0	1	0	0	0	0	2	14	1	0	0	55	0	2	29	0	0	0	0	0	0	0	0	1	0	1	1	7	0	2	0	0	0	0	1	28	4	40	49	0
10780	0	0	0	0	0	0	0	0	0	0	0	0	0	0	0	0	0	26	20	1	0	0	2	6	1	0	0	1	0	0	0	0	0	0	0	0	0	0	0	0	0	0	0	0	0	0	0	0	0
10806	0	0	0	0	0	0	0	0	0	0	0	0	0	0	0	0	0	0	0	0	0	0	0	0	0	1	3	3	10	0	0	0	0	0	0	0	0	0	0	0	0	0	0	0	0	0	0	0	0
10813	0	0	0	0	0	0	0	0	0	0	0	0	0	0	0	0	0	0	0	0	3	17	4	2	4	5	1	4	6	0	0	0	0	0	0	0	0	0	0	0	0	0	0	0	0	0	0	0	0
10824	0	0	0	0	0	0	0	0	0	0	0	0	0	0	0	0	0	0	0	0	0	0	0	0	201	60	16	33	29	0	0	0	0	0	0	0	0	0	0	0	0	0	0	0	0	0	0	0	0
10845	0	0	0	0	0	5	0	0	0	0	0	0	0	0	0	0	29	0	0	0	0	0	0	0	0	0	4	5	13	0	0	0	0	0	0	0	0	0	0	0	0	0	0	0	2	0	1	1	0
10848	0	0	0	0	0	0	0	0	0	0	0	0	0	0	0	0	1	0	0	0	0	0	0	0	8	22	0	5	14	0	0	0	0	0	0	0	0	0	0	0	0	0	0	0	0	0	0	0	0
10869	0	0	0	0	0	0	0	0	0	0	0	0	0	0	0	0	0	0	1	0	0	0	0	0	0	1	0	2	2	0	0	0	0	0	0	0	0	0	0	0	0	0	0	0	0	0	0	0	0
10870	0	0	0	0	0	0	0	0	0	0	0	0	0	0	0	0	0	3	0	9	0	0	0	0	0	0	0	0	0	0	0	0	0	0	0	0	0	0	0	0	0	0	0	0	0	0	0	0	0
10893	0	0	0	0	0	0	0	0	0	0	0	0	0	0	0	0	0	2	8	0	0	36	0	2	0	0	0	0	0	0	0	0	0	0	0	0	1	0	0	0	0	0	0	0	0	0	0	0	0
10904	0	0	0	0	0	0	0	0	0	0	0	0	0	0	0	0	0	15	12	0	1	0	0	0	0	0	0	0	0	0	0	0	0	0	0	0	0	0	0	0	0	0	0	0	0	0	0	0	0
10956	0	0	0	0	0	0	0	0	0	0	0	0	0	0	0	0	0	0	0	0	0	0	0	0	0	0	0	0	0	0	0	0	0	0	0	0	0	0	0	0	0	0	0	0	0	0	0	0	0
10968	0	0	0	0	0	0	0	0	0	0	0	0	0	0	0	0	0	0	1	2	0	0	0	0	0	0	0	0	0	0	0	0	0	0	0	0	0	0	0	0	0	0	0	0	0	0	0	0	0
11016	0	0	0	0	0	0	0	0	0	0	0	0	0	0	0	0	1	0	0	1	18	1	0	1	0	0	0	0	0	0	0	0	0	0	0	0	0	0	0	0	0	0	0	0	0	0	0	0	0
11024	0	0	0	0	0	0	0	0	0	0	0	0	0	0	0	0	0	0	0	0	0	0	0	0	0	0	0	0	0	0	0	1	1	10	1	2	4	0	0	0	0	5	35	2	1	2	7	6	9
11047	0	0	0	0	0	0	0	0	0	22	2	1	0	0	0	0	0	0	0	0	0	0	0	0	0	0	0	0	0	0	0	3	17	7	0	0	0	0	0	0	0	58	244	7	1	1	1	1	0
11075	0	0	0	0	0	0	0	0	0	0	0	0	0	0	0	0	0	0	0	0	0	0	0	0	0	0	0	0	0	0	0	1	0	0	0	0	0	0	0	0	0	83	288	42	0	0	0	0	0
11090	0	1	0	0	1	29	12	0	0	0	0	1	11	0	0	0	0	0	0	0	2	0	21	0	0	0	0	0	0	0	0	1	1	0	6	4	6	8	0	0	0	0	0	0	1	1	1	16	0
11109	0	0	0	0	0	0	0	0	0	0	0	0	0	0	0	0	0	0	0	0	0	0	0	0	0	0	0	0	0	0	0	0	0	0	0	0	0	0	0	0	0	0	0	0	0	0	0	0	0
11130	0	0	0	0	0	0	0	0	0	0	0	0	0	0	0	0	0	0	0	0	0	0	0	0	0	0	0	0	0	0	0	0	0	0	0	0	0	0	0	0	0	0	0	0	0	0	0	0	0
11179	0	0	0	0	0	0	0	0	0	0	0	0	0	0	0	0	1	0	0	0	0	0	0	0	0	0	0	0	0	0	0	0	0	0	0	0	0	0	0	0	0	0	0	0	0	0	0	0	0
11211	0	0	0	0	0	0	0	0	0	0	0	0	0	0	0	14	176	25	2	0	15	385	14	0	0	0	0	0	0	0	0	0	0	0	1	0	0	0	0	0	0	5	0	0	0	0	0	0	0
11221	0	0	1	0	4	4	5	3	0	0	0	0	21	0	0	0	0	0	0	0	0	0	0	0	0	0	0	0	0	0	1	0	0	0	1	6	9	0	2	0	0	0	0	0	0	0	0	0	0
11225	0	0	0	0	0	0	0	0	0	0	0	0	0	0	0	0	4	0	0	0	0	0	0	0	0	0	0	0	0	0	0	0	0	0	0	0	0	0	0	0	0	0	0	0	1	2	9	15	1
11291	0	0	0	0	0	0	0	0	0	0	0	0	0	0	0	0	70	0	0	0	0	2	0	0	0	0	0	0	0	0	0	0	0	0	0	0	0	1	0	0	0	0	1	0	0	0	0	0	0
11308	0	0	0	0	1	0	0	0	0	0	0	0	0	0	0	1	7	0	2	0	44	635	2	171	53	3	0	6	3	0	0	0	0	0	1	0	2	0	0	0	0	15	13	4	1	18	1	10	12
11315	0	0	0	0	0	0	0	0	0	90	1	0	0	0	0	0	0	0	0	0	0	0	0	0	0	0	0	0	0	0	0	0	1	0	0	0	0	0	0	0	0	0	0	0	0	0	0	0	0
11319	0	0	0	0	0	0	0	0	0	0	0	0	0	0	0	0	0	0	0	0	0	0	0	0	0	0	0	0	0	0	0	0	0	0	0	0	0	0	0	31	36	0	0	0	0	0	0	0	0
11346	0	0	0	0	0	0	0	0	0	0	0	0	0	0	0	0	8	0	5	0	0	0	0	0	0	0	0	0	0	0	0	0	0	0	0	0	0	0	0	0	0	0	0	0	0	0	0	0	0
11349	0	0	0	0	0	0	0	0	0	0	0	0	0	0	0	0	0	0	0	0	0	0	1	0	0	2	0	0	1	0	0	0	0	0	0	0	0	0	0	0	0	0	0	0	0	0	0	7	0
11353	46	29	41	8	0	0	0	0	0	1	0	3	0	0	15	0	0	0	3	0	0	0	0	0	0	0	0	0	0	5	3	0	0	1	108	59	134	2	0	0	0	24	6	24	5	3	0	0	6
11379	0	0	0	0	0	0	0	0	0	0	0	0	0	0	0	0	0	0	0	0	0	0	0	0	0	0	0	0	0	2	2	8	9	8	0	1	1	0	0	0	0	0	2	0	12	1	3	3	0
11392	0	0	0	0	0	3	8	0	0	0	0	0	0	0	0	2	7	5	44	0	2	0	0	15	0	3	4	3	0	1	0	0	0	0	0	0	0	0	0	0	0	0	0	0	0	0	0	0	0
11447	0	0	0	0	0	0	0	0	0	11	33	0	0	0	0	0	0	0	0	0	0	0	0	0	0	0	0	0	0	0	0	6	0	0	0	0	0	0	0	0	0	0	0	0	0	0	0	0	0
11459	0	0	0	0	0	0	0	0	0	0	0	0	0	4	2	2	0	9	40	0	0	0	2	1	0	0	0	0	0	1	1	0	0	0	3	3	0	8	2	0	0	0	1	0	1	1	2	0	1
11527	0	0	0	0	0	0	0	0	0	0	0	0	0	0	0	2	0	78	52	0	0	0	1	10	1	0	0	0	1	0	0	0	0	0	0	0	0	0	0	0	0	0	0	0	0	0	0	0	0
11565	11	0	0	0	0	0	0	0	2	0	0	0	0	0	0	0	0	0	0	0	0	0	0	0	0	0	0	0	0	26	16	0	1	12	16	28	14	1	0	0	0	0	1	0	0	0	0	0	0
11622	0	0	1	2	66	0	0	1	0	0	0	0	0	0	0	0	0	0	0	0	0	0	0	0	0	0	0	0	0	0	0	0	0	0	0	0	0	0	0	0	0	0	0	0	0	0	0	0	0
11645	2	0	0	0	0	0	0	0	0	2	0	0	0	0	0	0	0	0	0	0	0	0	0	0	0	0	0	0	0	0	0	0	0	0	0	0	0	0	0	301	272	3	4	7	0	0	0	0	1
11664	0	0	0	0	0	0	0	0	0	0	0	0	0	0	0	0	1	0	0	0	0	0	0	0	0	0	0	0	0	0	0	0	0	0	0	0	0	0	0	0	0	0	0	0	11	1	8	8	0
11687	0	0	0	0	0	0	0	0	0	0	0	0	0	27	0	0	0	2	228	0	0	0	10	0	0	0	0	0	0	0	0	0	0	0	0	0	0	0	0	0	0	0	0	0	0	0	0	0	0
11707	0	0	0	0	4	0	0	0	3	0	0	0	7	0	0	7	0	4	0	0	50	17	0	10	0	1	0	0	4	0	0	0	0	0	0	0	0	0	0	0	0	0	0	0	0	0	1	0	0
11731	0	0	0	0	0	0	0	0	0	3	0	0	0	0	0	0	0	0	0	0	0	0	0	0	0	0	0	0	0	0	0	1	1	2	0	0	0	0	0	0	0	32	6	26	0	0	0	0	0
11750	0	0	0	0	0	0	0	0	0	0	0	0	0	0	0	37	0	0	0	0	97	300	0	0	0	0	0	0	0	0	0	0	0	0	0	0	0	0	0	0	0	0	0	0	0	0	0	0	0
11798	0	0	0	0	0	0	0	0	0	0	0	0	0	0	0	0	0	0	0	0	0	0	0	0	0	0	0	0	0	0	0	0	1	0	0	0	0	0	0	0	0	1	9	3	31	1	12	25	0
11848	0	0	2	0	0	0	0	0	0	0	0	0	0	0	0	0	0	36	4	0	0	0	0	0	0	0	0	0	0	0	0	0	0	0	0	2	2	0	0	0	0	4	0	3	0	0	0	0	0
11865	0	0	0	0	0	0	0	0	0	0	0	0	0	0	0	0	0	5	0	0	0	0	0	0	0	0	0	0	0	0	0	0	0	0	0	0	0	0	0	0	0	0	0	0	0	0	0	0	0
11898	0	0	0	0	0	0	0	0	0	0	0	0	0	0	0	0	0	0	0	0	0	0	0	0	0	0	0	0	0	0	0	0	0	0	0	0	0	0	0	166	90	0	0	0	0	0	0	0	0
11905	0	0	0	0	0	0	0	0	0	0	0	0	0	0	0	0	20	0	0	0	0	0	0	0	0	0	0	0	0	0	1	0	0	0	0	0	0	0	0	0	0	0	0	0	0	0	0	0	0
11950	0	0	0	0	0	0	0	0	0	0	0	0	0	0	0	0	0	0	12	0	0	6	0	1	18	2	2	0	0	0	0	0	0	0	1	0	2	24	0	0	0	0	0	0	0	0	0	1	0
12021	0	0	0	0	0	0	0	0	0	0	0	0	0	1	0	0	0	21	33	0	0	0	0	1	0	0	0	0	0	0	0	0	0	0	0	0	0	0	0	0	0	0	0	0	0	0	0	0	2
12051	0	0	0	0	7	6	45	0	1	0	0	0	0	0	0	0	0	0	0	0	0	0	0	0	0	0	0	0	0	0	0	0	0	0	0	0	0	0	0	0	0	0	0	0	0	0	0	0	0
12066	0	0	0	1	6	8	10	0	1	0	0	0	118	0	0	0	0	0	0	0	0	0	0	0	0	0	0	0	0	0	0	0	0	0	0	0	0	0	0	0	0	0	0	0	0	0	0	0	0
12091	6	4	9	45	227	886	828	111	174	0	0	2	270	2	7	43	45	27	176	1	378	1211	351	122	345	236	332	122	91	4	2	0	0	0	1	0	3	41	1	0	0	2	6	5	9	5	15	12	0
12133	0	0	0	0	0	0	0	0	0	0	0	0	0	0	0	0	0	0	0	0	0	3	2	1	0	0	0	2	2	0	0	0	0	0	0	0	0	0	0	0	0	0	0	0	0	0	0	1	0
12171	0	0	0	0	0	0	0	0	0	13	0	0	0	0	3	0	0	0	0	0	0	0	0	0	0	0	141	4	0	0	0	0	1	0	5	0	0	0	1	0	0	0	0	0	24	0	0	233	0
12186	0	0	0	0	0	0	0	0	0	0	0	0	0	0	0	0	0	0	0	55	1	2	0	8	0	0	0	0	0	0	0	0	0	0	0	0	3	0	0	0	0	0	0	0	0	0	0	0	0
12243	0	0	0	0	0	0	0	0	0	0	0	0	0	0	0	0	0	0	0	0	0	0	0	0	16	11	18	123	38	0	0	0	0	0	0	0	0	0	0	0	0	0	0	0	0	0	0	0	0
12268	0	0	0	0	0	0	0	0	0	0	0	0	0	0	0	0	1	0	0	0	0	0	0	0	0	0	0	0	0	0	0	0	0	0	0	0	0	0	0	0	0	0	0	0	0	0	0	0	0
12327	0	0	0	0	0	0	0	0	0	0	0	0	0	0	0	1	0	1	66	0	2	6	2	3	0	0	0	4	0	0	0	0	0	0	1	0	0	0	0	0	0	0	0	0	0	0	0	1	0
12337	0	0	0	0	0	0	0	0	0	0	0	0	0	0	0	0	8	0	0	0	12	34	1	3	0	0	0	0	0	0	0	0	0	0	0	0	0	0	0	0	0	0	0	0	1	2	0	0	4
12379	0	0	0	0	0	0	0	0	0	0	0	0	0	0	0	0	0	0	0	0	0	0	0	0	0	0	0	0	0	0	0	0	0	0	0	0	0	0	0	0	0	0	0	0	0	0	0	0	0
12441	0	0	0	0	0	0	0	0	0	1	0	0	0	0	0	0	0	0	0	0	0	0	0	0	0	0	0	0	0	0	0	556	0	0	0	0	0	0	0	0	0	0	0	0	0	0	0	0	0
12491	0	0	0	1	4	0	1	0	10	0	0	0	60	1	0	0	0	0	0	0	0	0	0	0	0	0	0	0	0	0	0	0	0	0	0	0	0	0	0	0	0	0	0	0	0	0	0	0	0
12544	0	0	0	0	0	0	0	0	0	0	0	0	0	0	0	0	0	0	0	0	0	0	0	0	0	0	0	0	0	0	0	92	4	0	0	0	0	0	0	0	0	0	0	0	0	0	0	0	0
12552	0	0	0	0	0	0	0	1	0	0	0	0	0	0	0	0	1	14	6	0	0	0	1	108	0	0	0	0	0	0	0	0	0	0	0	0	0	0	0	0	0	0	0	0	1	0	0	2	7
12555	0	0	0	0	0	0	0	0	0	0	0	0	0	0	0	0	0	0	0	0	0	0	0	0	0	0	0	0	0	0	0	0	0	0	0	0	0	0	0	0	0	0	0	0	0	0	0	0	0
12570	43	8	59	3	0	0	0	0	0	23	1	93	0	6	1	0	0	0	1	0	0	0	2	0	0	0	0	0	0	94	20	11	34	60	28	80	11	10	10	0	0	22	46	57	2	0	0	0	0
12623	0	0	0	22	0	0	0	0	0	0	0	0	0	9	0	0	31	46	2	0	0	0	0	20	0	2	0	0	0	0	0	0	0	0	0	0	0	0	0	2	0	0	0	0	0	1	0	0	0
12678	0	0	0	0	0	0	0	0	0	0	0	0	0	0	0	0	2	0	0	0	1	0	0	0	0	0	0	0	0	0	0	0	0	0	0	0	0	0	0	0	0	0	0	0	30	0	16	10	0
12694	0	0	0	0	0	0	0	0	0	0	0	0	0	0	0	0	5	0	0	0	0	0	0	0	0	0	0	0	0	0	0	0	0	0	0	0	0	0	0	0	0	0	0	0	0	0	0	0	0
12728	0	0	0	0	0	0	0	0	0	0	0	0	0	0	0	0	0	51	0	0	3	0	0	0	0	0	0	1	17	0	0	0	0	0	0	0	0	0	0	0	0	0	0	0	0	0	0	0	0
12731	0	0	0	0	0	0	0	0	0	0	0	0	0	0	0	0	2	10	11	10	5	5	0	0	1	0	0	2	0	0	0	0	0	0	0	0	0	0	0	0	0	0	0	0	0	0	0	0	0
12746	61	0	5	0	0	0	0	0	0	2	0	26	0	0	2	0	0	0	0	0	0	0	10	0	0	0	0	0	0	1	1	0	9	2	0	0	0	14	0	0	0	0	0	0	2	3	2	1	2
12784	0	0	0	0	0	0	0	0	0	0	0	0	0	0	0	0	0	0	1	0	1	28	1	2	2	1	0	13	1	0	0	0	0	0	0	0	0	0	0	0	0	0	0	0	0	0	0	0	0
12792	0	0	0	0	0	0	0	0	0	0	0	0	0	0	0	2	3	0	3	0	0	4	0	0	0	0	0	2	0	0	0	0	0	0	0	0	0	0	0	0	0	0	0	0	0	0	0	0	0
12822	0	0	0	0	0	0	0	0	0	0	0	0	0	1	0	0	0	0	0	0	0	0	0	0	0	0	0	0	0	0	0	0	0	0	0	0	0	0	0	0	0	71	3	25	3	1	1	1	2
12831	0	0	0	0	0	0	0	0	0	0	0	0	0	0	0	0	0	0	1	0	3	13	0	0	0	0	0	0	0	0	0	0	0	0	0	0	0	0	0	0	0	0	0	0	0	0	0	0	0
12849	0	0	0	0	0	0	0	0	0	0	0	0	0	0	0	24	0	0	0	0	20	13	1	0	5	0	1	5	1	0	0	0	0	0	0	0	0	0	0	0	0	0	0	0	0	0	0	0	0
12859	0	0	0	0	0	0	0	0	0	0	0	0	0	0	0	0	0	0	0	0	0	0	0	0	0	0	0	0	0	0	0	0	0	0	0	0	0	0	0	0	0	88	55	48	0	0	0	0	0
12867	155	199	35	1	0	0	0	0	0	5	1	81	1	38	130	0	0	20	0	0	0	0	475	0	0	0	0	0	0	49	107	4	1	0	366	358	239	73	0	0	0	0	0	0	14	3	4	5	16
12874	0	0	0	4	9	20	15	5	9	0	0	1	2	0	0	0	0	0	0	0	0	0	0	0	0	0	0	0	0	0	0	0	0	0	0	0	0	0	0	0	0	0	0	0	0	0	0	0	0
12909	0	0	0	2	0	120	82	0	0	0	0	0	0	0	0	2	1	0	0	0	0	0	0	0	0	0	0	0	0	0	0	0	5	5	0	0	0	0	0	0	0	0	0	0	3	1	4	4	0
12922	0	0	0	0	0	0	0	0	0	0	0	0	0	0	0	0	0	0	0	0	0	0	0	0	0	0	0	0	0	0	0	0	0	0	0	0	0	0	0	0	0	0	0	0	0	0	0	0	0
12926	0	0	0	0	0	0	0	0	0	0	0	0	0	0	0	0	1	0	0	0	5	60	0	0	2	5	0	2	0	0	0	0	0	0	0	0	0	0	1	0	0	0	0	0	0	0	0	0	0
12929	0	0	0	0	0	0	0	0	0	0	0	0	0	0	0	2	0	0	0	0	9	14	0	0	0	0	0	0	0	0	0	0	0	0	0	0	0	0	0	0	0	0	0	0	0	0	0	0	0
12945	0	0	0	0	0	0	0	0	0	0	0	0	0	0	1	0	8	0	0	0	0	171	1	0	0	0	6	0	2	0	0	0	0	0	0	0	0	0	0	0	0	6	7	6	1	1	4	8	3
12973	0	0	1	7	1	20	13	5	1	1	0	0	0	1	1	0	0	0	0	0	0	0	0	0	0	0	0	0	0	0	0	0	0	0	0	0	0	0	0	0	0	0	0	0	0	0	0	0	0
12991	0	0	0	0	36	1	0	43	0	0	2	0	0	0	0	0	0	0	0	4	0	0	0	0	0	0	0	0	0	0	0	0	0	0	0	0	0	0	1	0	0	0	0	0	0	0	0	0	0
13002	0	0	0	0	0	0	0	0	0	0	0	0	0	0	0	0	0	0	0	0	0	0	0	0	0	0	0	0	0	0	0	0	0	0	0	0	0	0	0	0	0	0	0	0	0	0	0	0	0
13003	0	0	0	0	0	0	0	0	0	0	0	0	0	0	0	10	0	0	0	0	147	6	7	2	0	0	0	0	0	0	0	0	0	0	0	0	0	0	0	0	0	0	0	0	0	0	0	0	0
13016	0	1	0	1	0	0	0	0	4	0	0	0	1	0	0	0	0	0	0	0	0	0	0	0	0	0	0	0	0	0	0	0	0	0	0	0	0	0	0	0	0	0	0	0	3	14	1	1	1
13021	3	0	0	0	0	0	0	0	0	1	0	1	0	2	3	0	0	0	0	0	0	0	15	0	0	0	0	0	0	1	1	0	0	0	4	1	2	18	0	0	0	0	0	0	0	0	0	0	0
13064	0	0	0	0	0	0	0	0	0	0	0	0	83	0	0	2	0	0	0	0	0	0	0	0	0	0	0	0	0	0	0	0	0	0	0	0	0	0	0	0	0	0	0	0	0	0	0	0	0
13105	1	2	0	39	16	37	55	70	18	0	0	0	1	0	0	0	0	0	0	0	0	0	0	0	0	0	0	0	0	0	0	0	0	0	0	0	0	0	0	0	0	0	0	0	0	0	0	0	0
13161	0	0	0	0	0	0	0	0	0	0	0	0	0	0	0	0	0	0	0	0	2	0	0	1	0	0	0	0	4	0	0	0	0	0	0	0	0	0	0	0	0	0	0	0	0	0	0	0	0
13199	0	0	0	0	0	0	0	0	0	0	0	0	0	0	0	5	73	0	1	1	1	6	11	1	2	0	1	2	3	0	0	0	0	0	0	0	0	0	0	0	0	0	0	0	0	0	0	0	0
13234	0	0	2	0	9	3	2	1	0	0	0	0	20	14	4	0	2	0	1	10	0	0	32	46	0	0	0	0	0	1	0	0	0	0	0	0	0	7	1	0	0	0	0	0	4	0	1	1	0
13247	0	0	0	0	0	0	0	0	0	0	0	0	0	0	0	1	1	1	77	0	3	104	0	0	0	0	0	0	0	0	0	0	0	0	0	0	0	0	0	0	0	0	0	0	0	0	0	0	0
13315	1	0	0	0	0	0	0	0	0	0	0	0	0	0	0	0	0	0	0	0	0	0	0	0	0	0	0	0	0	0	0	0	0	0	0	0	0	0	0	0	0	28	8	14	0	0	0	0	0
13382	0	0	0	0	0	0	0	0	0	0	0	0	0	0	0	0	0	0	0	0	0	0	0	0	0	0	0	0	0	0	0	0	0	0	0	0	0	0	0	0	0	0	0	0	0	0	0	0	0
13395	0	0	0	0	0	0	0	0	0	0	0	0	0	0	0	0	0	0	0	0	0	0	0	0	0	0	0	0	0	0	0	0	0	0	0	0	0	0	0	0	0	0	0	0	0	0	0	0	0
13417	0	0	1	0	0	0	0	0	0	22	21	1	0	0	2	0	0	0	0	0	0	0	10	0	0	0	0	0	0	1	0	59	87	98	0	2	0	4	0	0	0	7	0	0	0	0	0	0	0
13483	97	8	2	0	0	0	0	0	0	0	0	15	0	2	0	0	0	0	0	0	0	0	1	0	0	0	0	0	0	31	16	1	0	0	3	18	1	53	7	0	0	0	0	0	0	0	0	0	0
13500	0	0	0	0	0	0	0	0	0	0	0	0	0	0	0	0	24	0	0	0	0	0	0	0	0	0	0	0	0	0	0	0	0	0	0	0	0	0	0	0	0	0	0	0	0	0	0	0	0
13545	0	0	0	0	0	0	0	0	0	0	0	0	0	1	0	0	0	0	0	0	0	0	0	0	1	10	1	14	8	0	0	0	0	0	0	0	0	0	0	0	0	0	0	0	0	0	0	0	0
13591	0	0	0	0	0	0	0	0	0	0	0	0	0	0	0	0	0	0	0	0	0	0	0	0	0	0	0	0	0	0	0	0	0	0	0	0	0	0	0	0	0	0	0	0	0	0	0	0	0
13650	0	0	0	0	0	0	0	0	0	0	0	0	0	0	0	0	2	37	0	0	37	0	2	93	45	26	25	108	180	0	0	0	0	0	0	0	0	0	1	0	0	0	0	0	0	0	0	0	0
13775	0	0	0	0	0	0	0	0	0	0	0	0	0	0	0	0	195	0	0	0	0	0	0	0	0	0	0	0	0	0	0	0	0	0	0	0	0	0	0	0	0	0	0	0	0	0	0	0	0
13791	0	0	2	0	0	0	0	0	0	21	53	2	0	0	7	0	0	0	1	0	0	0	4	0	0	0	0	0	0	2	4	101	49	58	29	29	16	0	0	89	73	0	0	2	7	12	1	2	1
13815	0	0	0	0	0	0	0	0	0	0	0	0	0	0	0	5	12	0	5	0	45	8	0	0	2	1	0	1	1	0	0	0	0	0	0	0	0	0	0	0	0	0	0	0	0	0	0	0	0
13860	0	0	0	0	0	0	0	0	0	0	0	0	0	0	0	0	0	0	0	0	0	0	0	0	0	0	0	0	0	0	0	0	0	0	0	0	0	0	0	0	0	0	0	0	0	0	0	0	0
13911	3	6	5	58	126	186	267	291	143	0	0	1	77	1	1	7	0	0	52	0	6	255	2	18	39	25	14	55	58	2	0	1	1	0	10	8	5	3	0	0	0	15	42	26	35	72	61	38	42
13945	145	39	272	3	0	0	0	14	30	0	0	10	0	67	1	1	4	72	2058	1	0	0	5	1	0	0	0	0	0	121	47	0	13	20	5	26	8	164	132	0	0	0	0	1	2	1	3	1	6
14010	0	0	0	0	0	0	0	0	0	0	0	0	0	0	0	1	0	5	157	13	0	0	0	1	1	10	0	0	4	0	0	0	0	0	0	0	0	0	0	0	0	0	0	0	0	0	0	0	0
14018	0	0	0	0	0	0	0	0	0	0	0	0	0	0	0	1	0	5	6	17	0	22	164	2	1	11	0	10	2	0	0	0	0	0	0	0	0	0	0	0	0	0	0	0	0	0	0	0	0
14045	0	0	0	0	0	0	0	0	0	0	0	0	0	0	0	0	0	2	0	1	0	0	0	3	0	0	0	0	0	0	0	0	0	0	0	0	0	0	0	0	0	0	0	0	0	0	0	0	0
14050	0	2	0	0	0	0	0	0	0	1	0	1	0	0	3	0	0	4	7	0	0	0	33	0	0	0	0	0	0	2	1	0	1	0	2	6	2	1	0	0	0	0	0	1	0	0	0	0	0
14058	4	4	0	13	34	150	166	189	38	0	0	3	2	0	1	49	402	0	4	0	169	303	35	89	122	63	32	31	41	0	2	1	0	0	9	10	30	68	1	0	0	17	28	25	33	55	39	43	28
14064	1	8	1	0	0	0	0	1	0	0	0	1	0	28	7	0	0	3	34	0	0	0	2	0	0	0	0	0	0	0	0	0	0	0	0	1	0	3	0	0	0	0	0	0	0	0	2	0	1
14070	0	0	0	0	11	12	35	41	15	0	0	0	0	0	0	0	61	0	1	0	0	0	12	0	2	13	1	1	20	0	0	0	0	0	0	0	0	4	0	0	0	0	1	0	10	58	9	12	5
14073	2	0	0	0	0	0	0	0	0	154	316	6	0	13	0	0	0	0	0	0	0	0	1	0	0	0	0	0	0	0	0	85	3	12	0	0	0	0	0	0	0	0	0	0	1	2	2	0	4
14118	0	0	0	0	0	0	0	74	11	0	0	0	0	0	0	0	0	0	0	0	0	0	0	0	0	0	0	0	0	0	0	0	0	0	0	0	0	0	0	0	0	0	0	0	0	1	1	0	0
14138	10	16	0	133	160	614	537	524	332	0	0	1	8	0	0	0	0	0	0	0	0	0	0	0	0	0	0	0	0	8	16	0	2	1	29	15	45	12	0	0	0	60	84	59	306	360	315	477	129
14203	0	0	0	0	0	0	0	0	0	0	0	0	0	0	0	0	0	0	0	0	0	0	0	0	0	0	0	0	0	0	0	0	0	0	0	0	0	0	0	0	0	0	0	0	0	0	0	0	0
14219	2	0	0	2	0	0	0	3	0	0	0	1	0	1	0	4	0	39	6	0	0	0	1	0	0	0	0	0	0	1	0	0	0	0	11	1	22	0	0	0	0	0	0	0	1	0	0	1	0
14230	0	0	0	0	0	0	0	0	0	0	0	0	0	0	0	0	0	0	0	0	0	0	0	0	0	0	0	0	0	0	3	1	2	1	4	8	3	54	1	0	0	18	29	14	48	67	46	32	44
14260	0	0	0	0	0	0	0	0	0	0	0	0	0	0	0	0	0	14	39	11	0	1	0	1	0	0	0	0	0	0	0	0	0	0	0	0	0	0	0	0	0	0	0	0	0	0	0	0	0
14337	0	0	0	0	0	7	6	0	0	0	0	0	0	0	0	3	2	0	0	0	0	0	3	0	4	3	0	5	19	0	0	0	0	0	7	0	2	0	0	0	0	0	0	0	0	0	3	3	0
14356	0	0	0	0	0	0	0	0	0	0	0	0	0	0	0	0	0	0	0	0	0	1	2	2	0	2	0	0	0	0	0	0	0	0	0	0	0	0	0	0	0	0	0	0	0	0	0	0	0
14397	0	0	0	0	0	0	0	0	0	0	0	0	0	0	0	0	0	0	0	0	0	0	0	0	0	0	0	0	0	0	0	0	0	0	0	0	0	0	0	65	23	0	1	0	0	0	0	0	0
14402	0	0	0	0	0	0	0	0	0	0	0	0	0	0	0	0	2	0	0	0	0	0	0	0	1	0	0	1	0	0	0	0	0	0	0	0	0	0	0	0	0	0	0	0	0	0	0	0	0
14421	0	0	0	0	0	0	0	0	0	0	0	0	0	0	0	0	0	0	0	0	0	0	0	0	0	0	0	0	0	0	0	0	0	0	0	0	0	0	0	0	0	0	0	0	0	0	0	0	0
14426	0	0	0	0	0	0	0	0	0	0	0	0	0	0	0	21	0	15	141	0	3	0	5	107	0	0	0	0	0	0	0	0	0	0	0	0	0	0	0	0	0	0	0	0	0	0	0	0	0
14442	0	1	0	0	0	0	4	1	1	0	0	0	4	5	0	17	19	10	69	5	9	85	105	63	63	30	5	33	85	0	0	0	0	0	0	0	0	1	0	0	0	0	0	0	4	2	0	4	3
14443	0	0	0	0	0	0	0	0	0	12	27	0	0	1	4	0	0	0	2	0	0	0	10	0	0	0	0	0	0	0	0	4	1	0	0	0	0	0	0	0	0	0	0	0	0	0	0	0	2
14459	0	0	0	0	0	0	0	0	0	0	0	0	0	0	0	0	0	0	0	0	0	0	0	0	0	0	0	0	0	0	0	0	0	0	0	0	0	0	0	0	0	0	0	0	0	0	0	0	0
14461	0	0	0	0	0	0	0	0	0	52	49	0	0	0	0	0	0	0	0	0	0	0	0	0	0	0	0	0	0	0	0	0	1	0	0	0	0	0	0	0	0	0	0	0	0	0	0	0	0
14462	0	0	0	0	0	13	16	0	0	0	0	0	2	0	0	0	1	1	8	0	0	0	0	0	0	4	2	0	0	0	0	0	0	0	0	0	0	0	0	0	0	0	0	0	0	0	0	0	0
14475	0	0	0	0	0	0	0	0	0	0	0	0	0	0	0	0	0	0	0	1	0	217	0	1	0	0	0	1	0	0	0	0	0	0	0	0	0	0	0	0	0	0	0	0	0	0	0	0	0
14542	1	1	0	3	9	21	15	19	6	0	0	0	32	0	0	0	0	0	0	0	0	0	0	0	0	0	0	0	0	0	0	0	0	0	0	0	0	0	0	0	0	0	0	0	0	0	0	0	0
14585	0	0	0	0	0	0	0	0	0	0	0	0	0	0	0	18	32	0	0	0	0	0	0	0	0	0	0	0	0	0	0	0	0	0	0	0	0	0	0	0	0	0	0	0	1	4	0	0	0
14587	0	0	0	0	0	0	0	0	0	0	0	0	0	0	0	0	5	0	0	0	0	0	0	0	0	0	0	0	0	0	0	0	0	0	0	0	0	0	0	0	0	0	0	0	5	3	6	9	0
14598	0	0	7	3	0	0	0	0	5	0	0	2	0	0	1	8	0	12	0	0	0	0	3	108	20	157	67	47	18	0	0	0	0	0	0	0	0	0	1	0	0	0	0	0	0	0	3	3	0
14601	38	7	7	0	0	0	0	0	0	16	0	59	0	0	0	0	0	0	0	0	0	0	1	0	0	0	0	0	0	1	0	0	0	0	0	0	1	0	0	0	0	28	12	28	0	1	0	0	2
14603	0	0	0	0	0	0	0	0	0	0	0	0	0	0	0	0	33	0	0	0	0	13	0	1	7	7	1	8	6	0	0	0	0	0	0	0	0	0	0	0	0	0	0	0	0	0	0	0	0
14623	4	11	12	84	83	56	159	74	64	0	0	0	213	18	3	0	0	0	0	0	0	0	0	0	0	0	0	0	0	0	0	0	0	1	0	0	0	0	0	0	0	0	0	0	0	0	0	0	0
14626	0	0	0	0	0	0	0	0	0	0	0	0	0	0	0	0	0	0	0	0	0	10	34	38	7	2	0	5	14	0	0	0	0	0	0	0	0	0	0	0	0	0	0	0	0	0	0	1	0
14712	0	0	0	0	0	0	0	0	0	0	0	0	0	0	0	7	1	7	15	0	5	0	0	2	0	0	0	0	0	0	0	0	0	0	0	0	0	0	0	0	0	0	0	0	0	0	0	0	0
14715	0	0	0	0	0	0	0	0	0	193	9	0	0	0	0	0	0	0	0	0	0	0	0	0	0	0	0	0	0	0	0	0	1	0	0	0	0	0	0	0	0	0	0	0	0	0	0	0	0
14756	0	0	0	0	0	0	0	0	0	0	0	0	0	0	0	0	1	0	0	0	27	0	0	0	0	0	0	0	0	0	0	0	0	0	0	0	0	0	0	0	0	0	0	0	0	0	1	0	0
14771	0	0	0	0	0	0	0	0	0	0	0	0	0	0	0	0	0	0	8	0	0	0	7	1	0	0	0	0	0	0	0	0	0	0	0	0	0	0	0	0	0	0	0	0	1	0	0	0	0
14790	0	0	0	1	6	2	2	2	2	0	0	0	0	0	0	3	22	0	1	0	11	10	0	1	1	0	2	18	21	0	0	0	0	0	0	0	0	0	0	0	0	1	0	0	0	2	0	1	0
14794	0	0	0	3	0	24	11	0	0	0	0	0	0	0	0	0	1	0	0	0	0	0	0	0	0	0	0	0	1	0	0	0	0	0	0	0	0	0	0	0	0	0	0	0	2	0	4	1	0
14820	0	1	0	1	0	0	0	0	0	0	0	0	0	0	0	0	0	1	16	0	0	0	0	0	109	40	17	83	71	0	0	0	0	0	0	0	0	0	0	0	0	0	0	0	0	0	0	0	0
14839	0	0	0	0	0	0	0	0	0	0	0	0	0	0	0	2	36	3	51	0	4	701	19	4	0	0	0	0	0	0	0	0	0	0	0	0	0	0	0	0	0	1	1	1	3	0	2	10	1
14843	2	0	0	0	0	0	0	0	0	0	0	5	0	0	0	0	0	0	0	0	0	0	0	0	0	0	0	0	0	13	6	5	18	44	10	9	8	0	0	0	0	0	0	0	0	0	0	0	0
14885	0	0	0	0	0	0	0	0	0	0	0	0	0	0	0	0	0	0	0	0	0	0	0	0	0	0	0	0	0	0	0	0	0	0	0	0	0	0	0	172	166	0	0	0	0	0	0	0	0
14895	0	0	0	0	0	0	0	0	0	0	0	0	0	0	0	0	0	0	0	0	0	0	0	0	0	0	0	0	0	0	0	0	0	0	0	0	0	0	0	0	0	12	26	24	0	0	0	0	0
14905	3	0	0	0	0	0	0	0	0	1	0	49	0	32	0	0	0	0	0	0	0	0	18	0	0	0	0	0	0	0	0	0	0	0	0	0	0	0	0	0	0	0	0	0	37	2	17	11	104
14969	0	0	0	0	0	0	0	0	0	0	0	0	0	0	0	0	0	0	0	0	0	0	0	0	0	0	0	0	0	0	0	0	0	0	0	0	0	0	0	3238	3074	0	0	0	0	0	0	0	0
14978	0	0	0	0	0	0	0	0	0	0	0	0	0	0	0	32	0	0	0	0	0	0	0	1	0	0	0	0	0	1	0	0	0	0	0	0	0	0	0	0	0	0	0	1	3	1	16	8	1
14986	0	0	0	0	0	0	0	0	0	0	0	0	0	0	0	3	3	8	3	0	0	0	0	0	0	0	0	1	3	0	0	0	0	0	0	0	0	0	0	0	0	0	0	0	0	0	0	0	0
15017	0	0	0	0	0	1	0	0	0	0	0	0	0	0	0	0	16	0	0	0	4	13	1	0	1	1	2	5	1	0	0	0	0	0	0	0	0	0	0	0	0	0	0	0	0	0	0	1	0
15076	0	0	0	0	50	0	0	4	5	0	0	2	2	0	0	0	0	0	0	0	0	0	0	0	0	0	0	0	0	0	0	1	2	0	75	45	135	2	0	0	0	0	0	3	1	0	0	3	0
15078	0	0	0	0	0	0	0	0	0	0	0	0	0	0	0	3	0	2	1	1	1	35	0	0	0	3	1	3	2	0	0	0	0	0	0	0	0	0	0	0	0	0	0	0	0	0	0	0	0
15130	0	0	0	0	0	0	0	0	0	0	0	0	0	0	0	0	0	0	0	0	0	0	0	0	0	0	0	0	0	7	0	3	1	0	0	0	4	3	2	0	0	5	14	2	5	0	5	1	0
15151	0	0	0	0	0	0	0	0	0	0	0	0	0	0	0	148	26	0	0	0	0	0	0	0	0	0	0	0	0	0	0	0	0	0	0	0	0	0	0	0	0	0	0	0	0	1	0	0	0
15153	0	0	0	0	0	0	0	0	0	0	0	0	0	0	0	0	0	2	3	0	0	0	44	0	0	0	0	0	0	0	0	5	0	0	0	0	0	0	0	0	0	0	0	0	0	0	0	0	0
15156	0	0	0	0	0	0	0	0	0	0	0	0	0	0	0	0	3	0	37	1	0	0	0	0	0	1	0	0	0	0	0	0	0	0	0	0	0	0	0	0	0	0	0	0	0	0	0	0	0
15164	0	0	0	0	0	0	0	0	0	0	0	0	0	0	2	0	4	0	0	0	0	0	186	4	0	0	0	0	1	0	0	0	0	0	0	0	0	0	0	0	0	0	0	0	0	0	0	0	0
15168	0	0	0	0	0	0	0	0	0	0	0	0	0	0	0	0	0	0	0	0	0	0	0	0	0	0	0	0	0	0	0	0	0	0	0	0	0	0	0	0	0	0	0	0	0	0	0	0	0
15206	0	0	0	1	0	0	0	0	0	0	0	0	0	0	0	54	0	0	11	0	10	192	72	2	304	164	53	385	127	4	8	0	0	0	12	3	16	0	3	0	0	0	1	1	62	16	94	62	0
15318	0	0	0	0	0	0	0	0	0	16	35	0	0	0	0	0	0	0	0	0	0	0	0	0	0	0	0	0	0	0	0	19	0	0	0	0	0	0	0	0	0	0	0	0	0	0	0	0	0
15429	0	0	0	0	0	0	0	0	1	0	0	0	0	0	0	0	0	0	0	1	0	0	0	0	0	0	0	0	0	0	0	0	0	0	0	0	0	0	0	0	0	0	0	0	0	0	0	0	0
15439	0	0	0	0	0	0	0	0	0	0	0	0	0	0	0	0	0	0	0	0	0	0	0	0	0	0	0	0	0	0	0	0	0	0	0	0	0	0	0	0	0	0	0	0	0	0	0	0	0
15450	0	0	0	0	0	0	0	0	0	0	0	0	0	0	0	0	0	0	0	0	38	0	1	15	0	0	0	0	0	0	0	0	0	0	0	0	0	0	0	0	0	0	0	0	0	0	0	0	0
15455	0	0	0	0	0	0	0	0	0	0	0	0	0	0	0	0	7	0	49	0	0	0	0	1	0	0	0	0	0	0	0	0	0	0	0	0	0	0	0	0	0	0	0	0	0	0	0	0	0
15540	1	0	1	0	0	77	24	1	0	0	4	0	14	0	5	0	0	0	0	0	63	0	45	31	16	3	24	58	31	0	0	0	0	0	0	0	0	0	0	0	0	0	0	0	0	0	0	0	0
15580	0	0	0	0	0	0	0	0	0	0	3	0	0	0	0	0	0	0	0	0	0	0	26	0	0	0	0	0	0	0	0	1	0	0	0	0	1	0	0	0	0	243	84	108	0	0	0	0	0
15631	0	0	0	0	0	0	0	0	0	0	0	0	0	0	0	1	2	1	41	14	1	0	0	3	0	0	0	0	0	0	0	0	0	0	0	0	0	0	0	0	0	0	0	0	0	0	0	0	0
15654	0	0	0	0	0	0	0	0	0	0	0	0	0	2	0	0	0	0	0	0	0	0	38	0	0	0	0	0	0	0	0	0	0	0	0	0	0	0	0	11	28	0	0	1	0	0	0	0	0
15667	0	0	0	0	0	0	0	0	0	0	0	0	0	0	0	17	0	5	4	19	0	21	24	347	0	0	0	0	1	0	0	0	0	0	0	0	0	0	0	0	0	0	0	0	0	0	0	0	0
15668	0	0	0	0	0	0	0	0	0	0	0	0	0	0	0	3	0	0	0	0	1	0	0	0	0	0	0	0	0	0	0	0	0	0	0	0	0	0	0	0	0	0	0	0	0	0	0	0	0
15698	0	0	0	0	0	0	0	0	0	0	0	0	0	0	0	0	0	0	0	0	0	0	0	0	0	0	0	0	0	0	0	0	0	0	0	0	0	0	0	0	0	0	0	0	0	0	0	0	0
15701	0	0	0	0	0	1	14	2	2	0	0	0	4	0	0	9	356	8	73	10	66	267	132	26	35	14	2	56	56	0	0	0	2	0	3	0	2	1	0	0	0	1	3	1	5	5	4	25	4
15723	0	0	0	0	0	0	0	0	0	0	0	0	0	0	0	5	2	0	0	0	2	0	4	0	0	0	0	0	0	0	0	0	0	1	0	0	0	0	0	0	0	0	0	0	0	3	0	0	0
15744	0	0	0	0	0	0	0	0	0	0	0	0	0	0	0	0	0	0	0	0	0	0	0	0	0	0	0	0	0	0	0	0	0	0	0	0	0	0	0	70	70	0	0	0	0	0	0	0	0
15746	6	7	3	7	0	0	0	0	3	3	0	4	0	37	6	1	0	131	219	0	0	0	76	9	0	0	0	0	0	9	7	0	9	1	10	11	6	22	1	0	0	0	0	1	5	0	5	4	6
15759	0	0	0	0	0	0	0	1	0	0	0	0	0	0	0	0	5	0	0	0	0	0	0	0	0	0	0	0	0	0	0	0	0	0	0	0	0	0	0	0	0	0	0	0	3	16	19	31	7
15796	0	0	0	0	0	0	0	0	0	1	0	8	0	6	0	0	0	0	0	0	0	0	0	1	0	0	0	0	0	0	0	0	0	1	0	0	0	0	0	0	0	0	0	0	5	12	12	12	26
15806	2	20	0	106	0	0	0	33	40	3	3	6	0	51	4	0	25	7211	2641	1	8	0	55	7077	0	3	0	1	0	1	0	0	2	1	11	9	6	3	3	0	0	0	0	0	42	117	107	48	515
15812	0	0	0	0	0	0	0	0	0	0	0	0	0	0	0	0	0	0	0	0	0	31	0	0	6	35	0	4	0	0	0	0	0	0	0	0	0	0	0	0	0	0	0	0	0	0	0	0	0
15822	0	0	0	0	0	0	0	0	0	0	0	0	0	0	0	0	0	0	0	0	0	0	0	0	0	0	0	0	0	0	0	0	0	0	0	0	0	0	0	0	0	4	9	8	1	2	12	39	0
15839	0	0	0	0	0	0	0	0	0	0	0	0	0	0	0	0	0	0	1	0	1	2	0	0	0	0	0	0	0	0	0	0	0	0	0	0	0	0	0	0	0	0	0	0	0	0	0	0	0
15890	0	0	0	0	0	0	0	0	0	0	0	0	0	0	0	0	0	0	0	0	0	17	0	0	0	0	0	0	0	0	0	0	0	0	0	0	0	0	0	0	0	0	0	0	0	0	0	0	0
15905	0	0	0	2	4	10	6	2	4	0	0	0	2	0	0	0	3	0	0	0	0	0	0	4	11	2	0	2	1	0	0	0	0	0	0	0	0	0	0	0	0	0	0	0	0	0	0	0	0
15907	0	1	0	0	7	3	16	11	4	0	0	0	0	0	0	0	9	0	0	0	0	0	0	0	0	9	0	0	17	0	0	0	0	0	0	0	0	0	0	0	0	0	0	0	0	0	0	0	0
15910	0	0	0	0	0	0	0	0	0	0	2	0	0	121	3	0	0	5	8	0	0	0	4	0	0	0	0	0	0	0	0	0	0	0	0	0	0	0	0	0	0	0	0	0	0	0	0	0	0
15922	0	0	0	0	0	0	0	0	0	0	0	0	0	0	0	6	0	4	65	3	1	1	0	0	0	0	0	0	0	0	0	0	0	0	0	0	0	0	0	0	0	0	0	0	0	0	0	0	0
15969	0	3	0	1	0	0	0	0	0	4	1	5	0	6	1	0	0	9	82	0	0	0	149	0	0	0	0	0	0	0	0	0	0	0	0	0	0	1	7	0	0	0	0	0	0	0	0	0	0
16034	0	0	0	0	0	0	0	0	0	0	0	0	0	0	0	0	0	0	0	0	0	0	0	0	2	6	0	7	10	0	0	0	0	0	0	0	0	0	0	0	0	0	0	0	0	0	0	0	0
16052	0	0	0	0	0	0	0	0	0	0	0	0	0	0	0	0	7	6	0	0	3	11	0	4	0	0	0	0	0	0	0	0	0	0	0	0	0	0	0	0	0	0	0	0	0	0	0	0	0
16058	1	2	2	15	0	0	0	8	6	0	0	1	0	5	1	1	0	3	5	0	0	0	0	2	0	0	0	0	0	6	2	0	5	17	8	24	11	1	1	0	0	3	7	5	12	5	26	5	19
16059	0	0	0	0	0	0	0	0	0	0	0	0	0	0	0	0	0	0	0	0	0	3	0	0	0	0	0	0	0	0	0	0	0	0	0	0	0	0	0	0	0	0	0	0	0	0	0	0	0
16147	0	0	0	0	0	0	0	0	0	0	0	0	0	0	0	0	0	0	0	0	0	0	0	0	0	0	0	0	0	0	0	0	0	0	0	0	0	0	0	0	0	0	0	0	0	0	0	0	0
16152	2	0	0	0	0	0	0	0	0	0	0	0	0	10	1	0	0	20	22	0	0	0	1	0	0	0	0	0	0	0	1	0	0	0	0	0	0	0	0	2	0	0	0	0	0	0	0	0	0
16233	0	0	0	0	0	0	0	0	0	0	0	0	0	0	0	0	1	4	6	5	6	183	7	19	7	3	1	16	9	0	0	0	0	0	0	0	0	0	0	0	0	0	1	0	2	3	3	0	0
16236	0	0	0	0	4	2	3	23	10	0	0	0	6	0	0	0	0	0	0	0	0	0	0	0	0	0	0	0	0	0	0	0	0	0	1	0	1	1	0	0	0	0	0	1	0	1	2	0	0
16422	13	0	0	1	0	0	0	1	0	3	1	1	0	0	0	0	0	0	0	0	0	0	0	0	0	0	0	0	0	0	0	0	0	0	0	0	0	0	0	0	0	1	0	0	18	1028	498	29	26
16430	0	0	0	2	0	13	16	3	5	0	0	0	2	0	0	8	10	7	1	1	6	164	13	23	15	4	13	61	29	5	2	0	0	0	5	2	15	10	0	0	0	0	6	3	6	12	9	19	10
16469	0	0	0	0	0	0	0	0	0	0	0	0	0	0	0	0	0	33	39	2	0	0	0	0	0	0	0	0	0	0	0	0	0	0	0	0	0	0	0	0	0	0	0	0	0	0	0	0	0
16480	0	0	0	0	0	0	0	0	0	5	17	0	0	2	2	0	0	4	17	0	0	0	33	0	0	0	0	0	0	3	1	7	3	4	5	0	3	7	0	0	0	2	0	0	0	1	0	0	1
16481	0	0	0	0	0	0	0	0	0	33	17	0	0	0	0	0	0	0	0	0	0	0	0	0	0	0	0	0	0	0	0	3	0	0	0	0	0	0	0	0	0	0	0	0	0	0	0	0	0
16493	0	0	0	0	0	0	0	0	0	0	0	0	0	0	0	1	0	31	3	19	8	0	0	5	0	0	0	0	0	0	0	0	0	0	0	0	0	0	0	0	0	0	0	0	0	0	0	0	0
16494	0	0	0	0	0	0	0	0	0	0	0	0	0	0	0	0	0	0	0	0	0	0	0	1	0	0	0	0	0	0	0	0	0	0	0	0	3	0	0	0	0	0	0	0	0	0	0	0	0
16511	0	0	0	3	0	0	0	0	0	0	0	0	0	75	17	0	0	0	0	0	0	0	0	0	0	0	0	0	0	0	0	0	0	0	0	0	0	0	0	0	0	0	0	0	0	0	0	0	0
16534	0	0	0	0	0	0	0	0	0	0	0	0	0	0	0	0	55	0	0	0	0	0	0	0	0	0	0	0	0	0	0	0	0	0	0	0	0	0	0	0	0	0	0	0	0	0	0	0	0
16539	0	0	0	0	0	0	0	0	0	0	0	0	0	0	0	0	2	0	0	0	0	0	0	0	0	0	0	0	0	0	0	0	0	0	0	0	0	2	0	0	0	0	0	0	0	0	0	1	0
16561	0	2	1	3	14	23	16	8	10	0	0	0	2	0	0	0	0	0	0	0	0	0	0	0	0	0	0	0	0	0	0	0	0	0	4	0	0	0	0	0	0	0	0	1	0	0	0	0	0
16645	0	0	0	0	0	0	0	0	0	0	0	0	0	0	0	0	0	0	0	0	0	0	0	0	0	0	0	0	0	0	0	0	0	0	0	0	0	0	0	0	0	0	0	0	0	0	0	0	0
16653	0	0	0	1	49	0	0	1	0	0	0	0	2	0	0	0	0	0	0	0	0	0	0	0	0	0	0	0	0	0	0	0	0	0	5	7	21	2	0	0	0	0	0	0	4	1	29	26	0
16663	0	0	0	0	0	0	0	0	0	0	0	0	0	0	0	0	0	0	1	0	2	0	0	0	0	0	0	0	0	0	0	0	0	0	0	0	0	0	0	0	0	0	0	0	0	0	0	0	0
16682	0	0	0	0	0	0	0	0	0	0	0	0	0	0	0	0	0	0	0	0	0	0	0	0	0	0	0	0	0	0	0	0	0	0	0	0	0	0	0	0	0	28	14	18	0	0	0	0	0
16755	0	0	0	0	0	0	0	0	0	0	0	0	0	0	0	0	1	3	4	0	0	0	0	0	0	0	0	0	0	0	0	0	0	0	0	1	2	0	0	0	0	0	0	0	0	0	0	0	0
16809	0	0	0	0	0	0	0	0	0	0	0	0	0	0	0	0	0	0	0	0	8	0	0	0	0	0	0	0	0	0	0	0	0	0	0	0	0	0	0	0	0	0	0	0	0	0	0	0	0
16934	0	0	0	0	0	0	0	0	0	0	0	0	0	0	0	0	0	0	0	0	0	0	0	0	0	0	0	0	0	0	0	0	0	0	0	0	0	0	0	0	0	0	0	1	0	0	0	0	0
16955	0	0	0	0	0	0	0	0	0	0	0	0	0	0	0	0	0	1	49	1	0	0	0	0	0	0	0	0	0	0	0	0	0	0	0	0	0	0	0	0	0	0	0	0	0	0	0	0	0
17102	0	0	0	0	0	0	0	0	0	10	6	0	0	0	0	0	0	0	2	0	0	0	0	0	0	0	0	0	0	0	0	11	24	13	0	0	0	0	0	0	0	1	2	3	0	1	0	0	0
17134	0	0	0	0	0	0	0	0	0	0	0	0	0	0	0	0	0	0	0	0	56	0	0	0	0	0	0	0	0	0	0	0	0	0	1	0	0	0	0	0	0	0	0	0	0	0	0	0	0
17148	0	1	0	17	13	48	52	21	10	0	0	1	13	0	0	0	0	0	0	0	0	0	0	0	0	0	0	0	0	0	0	0	0	0	0	0	0	0	0	0	0	0	0	0	0	0	0	0	0
17156	0	0	0	0	0	0	0	0	0	0	0	0	0	0	0	0	0	0	0	0	0	0	0	0	0	0	0	0	0	0	0	0	0	0	0	0	0	0	0	0	0	0	0	0	0	0	0	0	0
17166	0	0	0	0	0	0	0	0	0	0	0	0	0	0	0	0	0	0	69	0	0	0	0	27	0	0	0	0	0	0	0	0	0	0	0	0	0	0	0	0	0	0	0	0	0	0	0	0	0
17175	0	0	0	0	0	16	130	0	0	0	0	0	0	0	0	0	0	0	0	0	4	95	0	0	0	0	0	0	0	0	0	0	0	0	0	0	0	0	0	0	0	0	0	0	0	0	0	0	0
17211	0	0	0	0	0	0	0	0	0	0	0	0	0	0	0	0	0	0	0	0	0	0	0	0	0	0	0	0	41	0	0	0	0	0	0	0	0	0	0	0	0	0	0	0	0	0	0	0	0
17224	0	0	0	0	0	0	0	0	0	0	0	0	0	0	0	0	0	1	0	0	0	0	0	0	0	0	0	0	0	36	40	0	0	0	0	0	0	21	39	0	0	0	0	0	0	0	0	0	0
17246	0	0	0	0	0	1	0	0	0	3	0	0	70	0	0	0	0	0	0	0	0	0	203	118	0	0	0	0	0	0	0	0	0	0	0	0	0	0	0	0	0	0	0	0	0	0	0	0	0
17258	0	0	0	0	0	0	0	0	0	0	0	0	0	0	0	0	0	0	0	0	0	0	0	0	0	0	0	0	0	0	0	0	0	0	0	0	0	0	0	43	17	0	0	0	0	0	0	0	0
17305	0	1	0	0	105	4	13	0	12	0	0	0	35	0	0	0	0	0	0	0	0	0	0	0	0	0	0	0	0	0	0	0	0	0	0	0	0	0	0	0	0	0	0	0	0	0	0	0	0
17347	0	0	0	0	0	0	0	0	0	0	0	0	0	0	0	2	79	2	9	0	0	100	8	0	0	0	0	0	0	0	0	0	0	0	0	0	0	0	0	0	0	0	0	0	0	0	0	0	0
17355	0	0	0	0	0	0	0	0	0	0	0	0	0	0	0	15	0	44	13	0	66	372	205	290	0	0	0	0	0	0	0	0	0	0	0	0	0	0	0	0	0	0	0	0	0	0	0	0	0
17358	0	0	0	0	0	0	0	0	0	9	3	0	0	0	0	0	0	0	0	0	0	0	0	0	0	0	0	0	0	0	0	0	1	1	0	0	0	0	0	0	0	11	6	24	0	0	0	0	0
17367	0	0	0	0	0	0	0	0	0	0	0	0	0	0	0	1	0	2	0	1	59	1	0	0	0	11	0	1	1	0	0	0	0	0	0	0	0	0	0	0	0	0	0	0	0	0	0	0	0
17376	0	0	0	0	0	3	0	0	0	0	0	0	18	0	0	0	0	0	0	0	0	0	0	0	1	5	0	2	0	0	0	0	0	0	0	0	0	0	0	0	0	0	1	0	0	0	0	0	0
17428	0	0	0	0	0	0	0	1	0	0	0	0	0	0	0	0	52	0	0	0	0	1	0	5	0	4	0	3	2	0	0	0	0	0	0	0	0	0	0	0	0	0	0	0	0	0	0	2	1
17447	0	0	0	0	0	0	0	0	0	0	0	0	0	0	0	1	3	23	13	0	0	0	0	63	0	2	0	0	2	0	0	0	1	1	0	0	0	0	0	0	0	0	0	0	0	0	0	0	0
17547	0	0	0	0	0	0	0	0	0	0	0	0	0	14	11	0	0	1	20	0	0	0	5	2	0	0	0	0	0	0	0	0	0	0	0	0	1	9	1	0	0	0	2	0	6	0	1	1	5
17558	0	0	0	0	0	0	0	0	0	0	0	0	0	0	0	0	0	0	0	0	0	0	0	0	0	0	0	0	0	0	0	0	0	0	0	0	0	0	0	0	0	0	0	0	0	0	0	0	0
17580	0	0	0	0	1	0	0	0	0	0	0	0	0	0	0	0	0	0	0	0	0	0	2	0	0	0	0	0	0	0	0	0	0	0	0	0	0	0	0	0	0	0	0	0	0	0	0	0	0
17596	0	0	0	0	0	0	0	0	0	0	0	0	0	0	0	0	0	0	0	0	0	15	169	1	0	0	0	0	0	0	0	0	0	0	0	0	0	0	0	0	0	0	0	0	0	0	0	0	0
17612	0	0	0	0	0	0	0	0	0	0	0	0	0	0	0	0	0	0	0	0	0	0	0	0	0	0	0	0	0	0	0	0	0	0	0	0	0	0	0	0	0	0	0	0	0	0	0	0	0
17650	0	0	0	0	0	0	0	0	0	0	0	0	0	0	0	0	0	0	0	0	0	0	0	0	0	0	0	8	42	0	0	0	0	0	0	0	0	0	0	0	0	1	0	0	0	0	0	1	0
17677	0	0	0	0	0	0	0	0	0	0	0	0	0	0	1	0	1	0	24	0	0	48	84	15	22	0	0	18	45	0	0	0	0	0	0	0	0	0	0	0	0	0	0	0	0	0	0	0	0
17681	0	0	0	2	35	3	64	20	5	0	0	0	18	0	0	0	0	0	0	0	0	0	0	0	0	0	0	0	0	0	0	0	0	0	0	0	0	0	0	0	0	0	0	0	0	0	0	0	0
17702	0	0	0	0	0	0	0	0	0	0	0	0	0	0	0	0	0	0	0	0	0	0	0	0	0	0	0	0	0	0	0	0	0	0	0	0	0	0	0	0	0	0	0	0	0	0	0	0	0
17741	0	0	0	0	0	0	0	0	0	0	0	0	0	0	0	0	3	0	0	0	0	1	0	0	0	0	0	0	0	0	0	0	0	0	0	0	0	0	0	0	0	0	0	0	0	0	0	0	0
17744	0	0	0	0	0	0	0	0	0	0	0	0	0	0	0	4	2	0	0	0	0	0	0	0	0	0	0	0	0	0	0	0	0	0	0	0	0	0	0	0	0	0	0	0	0	0	0	0	0
17774	0	0	0	0	0	0	0	0	0	0	0	0	0	0	0	4	3	0	0	0	0	31	1	1	0	1	1	0	0	0	0	0	0	0	0	0	0	0	0	0	0	0	0	0	0	0	0	0	0
17778	0	0	0	0	0	0	0	0	0	0	0	0	0	0	0	0	10	2	0	0	0	0	0	3	0	0	0	0	0	0	0	0	0	0	0	0	0	0	0	0	0	0	0	0	0	0	0	0	0
17781	0	0	0	1	0	0	0	0	0	0	0	1	0	0	0	0	0	0	4	0	3	13	0	5	0	2	0	0	0	0	0	0	0	0	0	0	0	1	0	0	0	0	1	0	8	5	12	4	2
17782	0	0	0	0	0	0	0	0	0	0	0	0	0	0	0	0	0	0	0	0	0	1	1	0	0	0	0	0	0	0	0	0	0	0	0	0	0	0	0	0	0	0	0	0	0	0	0	0	0
17817	0	0	0	0	0	0	0	0	0	0	0	0	0	0	0	0	0	0	0	0	0	0	0	0	0	0	0	0	0	0	0	0	0	0	0	0	0	0	0	0	0	17	9	25	0	0	0	0	0
17862	0	0	0	0	0	0	0	0	0	0	0	0	0	0	0	0	0	2	8	3	6	12	6	1	1	3	0	2	5	0	0	0	0	0	0	0	0	3	0	0	0	0	0	0	5	1	3	1	4
17889	0	0	0	0	0	0	0	0	0	0	0	0	0	0	0	0	0	0	0	0	0	0	0	0	31	4	6	12	4	0	0	0	0	0	0	0	0	0	0	0	0	0	0	0	0	0	0	0	0
17905	0	0	0	0	0	0	0	0	0	0	0	0	0	0	0	0	0	0	0	0	0	0	0	0	0	1	0	1	0	0	0	0	0	0	0	0	0	0	0	0	0	0	0	0	0	0	0	0	0
17912	0	0	0	0	0	0	0	0	0	0	0	0	0	0	0	2	0	0	0	0	0	0	0	14	0	0	0	0	0	0	0	0	0	0	0	0	0	0	0	0	0	0	0	0	0	1	0	0	0
17961	0	0	0	3	2	11	2	3	1	0	0	0	0	0	0	3	10	0	12	0	4	9	6	3	5	3	1	6	35	0	0	0	0	0	0	0	0	3	0	0	0	0	0	0	0	0	1	3	0
18004	0	0	0	0	0	0	0	0	0	0	0	0	0	0	0	23	0	25	48	8	0	0	14	84	0	0	0	0	0	0	0	0	0	0	0	0	0	0	0	0	0	0	0	0	0	0	0	0	0
18096	3	12	25	5	0	0	0	0	0	0	1	3	0	0	0	0	0	2	93	0	0	0	55	2	0	0	0	0	0	0	6	0	1	8	1	0	0	4	11	0	0	0	0	0	0	0	0	0	0
18102	42	0	0	0	0	0	0	0	0	0	0	0	0	8	0	0	0	0	0	0	0	0	0	0	0	0	0	0	0	0	0	0	2	0	0	0	0	0	0	0	0	0	0	0	0	0	0	0	0
18110	0	0	0	0	0	0	0	0	0	0	0	0	0	0	0	0	0	0	0	0	0	0	0	0	0	0	0	0	0	0	0	0	0	0	0	0	0	0	0	0	0	0	0	0	0	0	0	0	0
18112	0	0	0	0	0	0	0	0	0	0	0	0	0	0	0	0	0	0	0	0	0	0	0	0	0	0	0	0	0	0	0	0	0	0	0	0	0	0	0	0	0	0	0	0	0	0	0	0	0
18128	0	0	0	0	0	3	0	0	0	0	0	0	0	0	0	0	4	1	0	0	13	65	0	0	0	1	1	0	0	0	0	0	0	0	0	0	0	0	0	0	0	0	0	1	0	22	0	0	6
18162	0	0	0	0	0	0	0	0	0	138	127	2	0	1	0	0	0	0	0	0	0	0	3	0	0	0	0	0	0	2	2	139	39	27	5	13	7	1	0	0	0	5	1	0	0	0	0	0	4
18192	0	0	0	0	0	0	0	0	0	0	0	0	0	0	0	0	2	0	1	2	1	67	7	0	0	0	0	0	0	0	0	0	0	0	0	0	0	0	0	0	0	0	0	0	0	0	0	0	0
18207	0	0	0	0	0	0	0	0	0	0	0	0	0	0	0	0	0	0	0	0	0	0	0	0	0	0	0	0	0	0	0	0	0	0	0	0	0	0	0	0	0	0	0	0	0	0	0	0	0
18225	0	0	0	0	0	0	0	0	0	0	0	0	0	0	0	0	0	0	0	0	0	0	0	1	0	0	0	0	0	0	0	0	0	0	0	0	0	0	0	0	0	0	0	0	0	0	0	0	0
18252	0	0	0	0	0	0	0	0	0	79	92	0	0	0	0	0	0	2	6	0	0	0	19	0	0	0	0	0	0	0	0	111	2	0	0	0	0	0	0	0	0	0	0	0	0	0	0	0	0
18285	0	0	0	0	0	0	0	0	0	0	0	0	0	0	0	0	0	0	0	0	0	0	0	0	0	0	0	0	0	0	0	0	0	0	0	0	0	0	0	0	0	0	0	0	4	4	19	55	0
18302	1	13	6	59	0	0	0	4	0	1	6	0	0	3	5	74	1	5	13	3	0	0	38	0	0	0	0	1	0	0	0	1	6	5	1	2	1	21	0	7	3	0	2	1	26	13	1	2	4
18304	0	0	0	0	0	0	0	0	0	0	0	0	0	0	0	0	9	0	0	0	0	0	0	1	1	2	0	41	31	1	1	0	0	0	0	0	0	0	0	0	0	0	0	0	1	0	2	1	0
18308	15	0	9	5	6	3	5	4	1	0	0	6	451	0	0	0	0	0	0	0	0	0	0	0	0	0	0	0	0	0	0	0	0	0	1	0	0	0	0	0	0	0	0	0	14	6	2	8	4
18404	0	0	0	0	0	0	0	0	0	0	0	0	0	0	0	33	7	172	1604	796	43	80	5	164	1	21	0	13	8	0	0	0	0	0	0	0	0	0	0	0	0	0	0	0	0	0	0	0	0
18423	0	0	0	0	0	0	0	0	0	0	0	0	0	0	0	9	0	5	3	0	0	104	21	2	0	0	0	0	0	0	0	0	0	0	0	0	1	0	0	0	0	0	0	0	0	0	0	0	0
18509	0	0	0	0	0	0	0	0	0	22	65	1	0	0	0	0	0	0	0	0	0	0	0	0	0	0	0	0	0	0	0	27	2	3	0	0	1	0	0	0	0	3	3	2	0	0	0	0	0
18558	19	17	20	50	0	0	0	15	33	2	4	106	0	35	79	0	0	0	2	0	0	0	14	3	0	0	0	0	0	6	7	0	15	16	14	19	24	0	5	0	0	3	5	2	28	62	21	32	105
18607	0	0	0	0	0	8	3	1	1	0	0	0	0	0	1	3	4	4	8	0	2	12	2	4	2	0	1	1	0	1	0	0	0	0	0	2	0	0	0	0	0	0	0	0	0	0	0	0	4
18620	1	0	0	0	0	0	0	0	0	0	0	0	0	11	29	0	0	0	0	0	0	0	115	0	0	0	0	0	0	0	0	0	0	0	0	1	0	246	37	0	0	0	0	0	0	0	0	0	1
18662	0	0	0	0	0	0	0	0	0	0	0	0	0	0	0	0	19	0	0	0	0	0	0	0	0	0	0	0	0	0	0	0	0	0	0	0	0	0	0	0	0	0	0	0	0	0	0	0	0
18680	0	0	0	0	0	0	0	0	0	0	0	0	0	0	0	0	0	8	0	0	0	0	0	0	0	0	0	0	0	0	0	0	0	0	0	0	0	0	0	0	0	0	0	0	0	0	0	0	0
18684	0	0	0	0	0	0	0	0	0	0	0	0	0	0	0	1	0	5	11	1	1	2	2	14	0	3	0	0	0	0	0	0	0	0	0	0	0	0	0	0	0	0	0	0	0	0	0	0	0
18695	0	0	0	0	0	0	0	0	0	0	0	0	1	0	0	0	2	0	0	0	0	17	1	1	2	0	0	7	0	0	0	0	0	0	0	0	1	1	0	0	0	0	0	0	0	0	0	1	0
18748	0	0	0	0	0	0	0	0	0	0	0	0	0	0	0	0	4	1	0	0	4	4	1	0	6	9	0	0	0	0	0	0	0	0	0	0	0	0	0	0	0	0	0	0	2	0	1	2	0
18782	0	0	0	0	0	0	0	0	0	0	0	0	0	0	0	0	0	0	0	0	0	0	0	0	0	0	0	0	0	0	0	0	0	0	0	0	0	0	0	0	0	21	31	31	0	0	0	0	0
18791	0	0	0	0	0	0	0	0	0	0	0	0	0	0	0	0	42	0	0	0	0	0	0	0	0	0	0	0	0	0	0	0	0	0	0	0	0	0	0	0	0	0	0	0	0	0	0	0	0
18807	0	0	0	0	0	0	2	0	0	0	0	0	0	0	0	0	0	2	8	0	0	23	16	4	3	0	1	2	1	0	0	0	0	0	0	0	0	0	0	0	0	0	0	0	5	4	5	5	5
18812	0	0	0	0	0	0	0	0	0	0	0	0	0	0	0	0	0	0	0	0	0	0	0	0	0	0	0	0	0	0	0	0	0	0	0	0	0	0	0	33	19	0	0	0	0	0	0	0	0
18851	0	0	0	0	0	0	0	0	0	0	0	0	0	0	0	1	1	4	2	2	1	1	1	0	2	0	0	0	0	0	0	0	0	0	0	0	0	0	0	0	0	0	0	0	0	0	0	0	0
18913	0	0	0	0	0	0	0	0	0	0	0	0	0	2	0	0	2	58	65	48	3	6	0	0	0	0	0	0	0	0	0	0	0	0	0	0	0	0	0	0	0	0	0	0	0	0	0	0	0
18936	0	0	0	0	0	0	0	2	0	3	1	26	0	42	101	0	0	0	0	0	0	0	469	23	0	0	0	0	0	0	0	0	27	50	5	12	9	2	0	0	0	100	87	47	15	60	20	17	31
18945	5	0	0	0	0	0	0	0	0	0	0	8	0	0	0	0	0	0	0	0	0	0	54	0	0	0	0	0	0	0	0	0	0	0	0	0	0	0	0	0	0	0	0	0	0	0	0	0	0
18952	0	0	0	0	0	0	0	0	0	0	0	0	0	0	0	0	0	0	0	0	1	0	0	274	0	0	0	0	0	0	0	0	0	0	0	0	0	0	0	0	0	0	0	0	0	0	0	0	0
18962	0	0	0	0	0	0	0	0	0	0	0	0	0	0	0	0	0	0	0	0	0	0	0	0	0	0	0	0	0	0	0	0	0	0	0	0	0	0	0	34	30	0	0	0	0	0	0	0	0
18991	0	0	0	0	0	0	0	0	0	0	0	0	0	0	0	0	0	0	0	0	0	0	0	0	5	22	0	13	11	0	0	0	0	0	0	0	0	0	0	0	0	0	0	0	0	0	0	0	0
19000	0	0	0	0	0	0	0	0	0	0	0	0	0	0	0	0	0	0	0	0	0	0	0	0	0	0	0	0	0	0	0	0	0	0	0	0	0	0	0	0	0	0	0	0	0	0	0	0	0
19015	0	0	0	0	11	17	14	1	0	0	0	0	0	0	0	2	29	0	0	0	2	9	0	3	0	0	0	7	5	0	0	0	0	0	1	1	0	1	0	0	0	0	0	0	0	2	1	0	1
19027	0	0	0	0	0	0	0	0	0	0	0	0	0	0	0	0	2	0	0	0	0	0	2	4	0	9	1	0	0	0	1	0	0	0	0	0	0	0	0	0	0	0	0	0	2	0	0	0	0
19043	2	12	3	1	0	0	0	5	0	0	1	0	0	4	2	3	3	66	7	0	0	1	9	26	0	0	0	0	0	0	1	0	4	6	0	0	1	4	76	0	2	136	25	80	7	10	17	0	0
19051	0	0	0	0	0	0	0	0	0	0	0	0	0	0	0	5	1	268	0	0	32	0	0	11	2	4	0	1	1	0	0	0	0	0	0	0	0	0	0	0	0	0	0	0	0	0	0	0	0
19107	0	0	0	0	0	0	0	0	0	247	3	0	0	0	0	0	0	0	0	0	0	0	0	0	0	0	0	0	0	0	0	0	1	0	0	0	0	0	0	0	0	0	0	0	0	0	0	0	0
19111	0	0	0	0	0	0	0	0	0	0	0	0	0	0	0	0	0	0	0	0	0	0	6	0	0	0	0	0	0	0	0	0	0	0	0	0	0	0	0	0	0	0	0	0	0	0	0	0	0
19138	37	0	1	0	0	0	0	1	0	0	0	0	0	3	3	0	0	0	9	0	0	0	1	1	0	0	0	0	0	0	0	0	0	0	0	0	0	0	0	0	0	0	0	0	0	1	0	0	0
19209	0	0	0	0	0	0	0	0	0	0	0	0	0	0	0	0	0	0	0	0	0	0	0	0	5	76	0	39	19	0	0	0	0	0	0	0	0	0	0	0	0	0	0	0	0	0	0	0	0
19223	0	0	0	0	0	0	0	0	0	0	0	0	0	0	0	0	0	0	0	0	0	0	0	0	63	0	0	8	1	0	0	0	0	0	0	0	0	0	0	0	0	0	0	0	0	0	0	0	0
19228	0	0	0	0	0	0	0	0	0	0	0	0	0	0	0	0	4	0	0	0	0	5	0	1	1	26	1	30	10	0	0	0	0	0	0	0	0	0	0	0	0	0	0	0	0	0	0	0	0
19255	0	0	0	0	0	13	27	0	0	0	0	0	0	0	0	0	0	0	0	0	0	0	0	0	0	0	0	0	0	0	0	0	0	0	0	0	0	0	0	0	0	0	0	0	0	0	0	0	0
19279	0	0	0	0	0	0	0	0	0	0	0	0	0	0	0	2	0	4	26	4	4	38	1	6	5	3	0	3	20	0	0	0	0	0	3	0	2	0	0	0	0	1	1	2	2	8	14	7	0
19309	0	0	0	0	0	0	0	0	0	0	0	0	0	0	0	0	1	5	0	0	0	1	0	0	0	0	0	0	0	0	0	0	0	0	0	0	0	0	0	0	0	0	0	0	0	0	0	0	0
19310	0	1	0	0	0	0	0	0	0	0	3	0	0	1	2	0	0	0	0	0	0	0	0	0	0	0	0	0	0	0	0	7	8	34	0	0	0	0	0	0	0	9	0	2	6	0	4	0	12
19328	0	0	0	0	0	0	0	0	0	0	0	0	0	0	0	0	0	0	0	0	0	0	0	0	0	1	0	0	0	0	0	0	0	0	0	0	0	0	0	0	0	0	0	0	0	0	0	0	0
19332	0	0	0	0	0	0	0	0	0	0	0	0	0	0	0	0	1	0	0	0	0	0	0	0	0	0	0	0	0	0	0	0	0	0	0	0	0	0	0	0	0	0	0	0	0	0	0	0	0
19346	0	0	0	0	0	0	0	0	0	0	0	0	0	0	0	0	0	0	0	0	0	1	0	0	0	0	0	0	0	0	0	0	0	0	0	0	0	0	0	0	0	0	0	0	0	0	0	0	0
19393	0	0	0	0	0	0	0	0	0	0	0	0	0	0	0	6	0	0	537	634	671	55	0	12	0	0	0	0	0	0	0	0	0	0	0	0	0	0	0	0	0	0	0	0	0	0	0	0	0
19432	0	0	0	0	0	0	0	0	0	0	1	0	0	1	0	0	0	0	1	0	0	0	0	0	0	0	0	0	0	0	0	2	7	2	0	0	0	0	0	0	0	0	0	0	15	7	8	12	8
19445	0	0	0	0	0	0	0	0	0	0	0	0	0	0	0	0	1	0	0	0	0	0	0	0	0	0	0	0	0	0	0	0	0	0	0	0	0	0	0	0	0	0	0	0	0	0	0	1	0
19528	0	0	0	0	0	0	0	0	0	122	74	0	0	0	0	0	0	0	0	0	0	0	0	0	0	0	0	0	0	0	0	0	0	0	0	0	0	0	0	0	0	0	0	0	0	0	0	0	0
19540	0	0	0	0	0	0	0	0	0	0	0	0	0	0	0	0	0	0	0	0	0	0	3	2	7	3	0	6	17	0	0	0	0	0	0	0	1	0	0	0	0	0	0	0	0	4	0	4	1
19543	0	0	0	0	0	0	0	0	0	0	0	0	0	0	0	0	0	0	0	0	0	0	0	0	0	0	0	0	0	0	0	0	0	0	0	0	0	0	0	90	49	0	0	0	0	0	0	0	0
19592	0	0	0	0	0	0	0	0	0	0	1	0	0	0	0	0	0	0	0	0	0	0	0	0	0	0	0	0	0	2	0	73	5	3	0	0	0	0	0	0	0	0	0	0	0	0	0	0	0
19628	0	0	2	1	10	3	5	5	5	1	0	0	69	2	0	3	2	69	342	16	3	5	2	36	5	17	0	3	28	0	0	0	1	0	2	2	8	4	2	0	0	11	12	9	1	11	0	1	3
19669	0	0	0	3	3	1	5	0	5	0	0	0	2	0	0	0	3	0	26	2	0	15	5	5	2	1	0	1	5	0	0	0	0	0	0	1	1	0	0	0	0	0	1	0	6	0	3	8	0
19681	0	0	0	1	34	1	10	1	1	0	0	0	45	0	0	0	0	0	0	0	0	0	0	0	0	0	0	0	0	0	0	0	0	0	0	0	0	0	0	0	0	0	0	0	0	0	0	0	0
19690	0	0	0	0	0	0	0	0	0	23	1	0	0	0	0	0	0	0	0	0	0	0	0	0	0	0	0	0	0	0	0	0	0	0	0	0	0	0	0	0	0	13	1	21	0	0	0	0	0
19717	0	0	1	5	10	10	13	9	9	0	0	0	0	0	0	0	0	0	0	0	0	0	0	0	0	0	0	0	0	0	0	0	0	0	2	0	1	19	0	0	0	2	4	1	0	0	0	0	1
19747	0	0	0	0	0	0	0	0	0	0	0	0	0	0	0	2	0	1	48	0	0	0	1	1	0	0	0	0	0	0	0	0	0	0	0	0	0	0	0	0	0	0	0	0	0	0	0	0	0
19774	0	0	0	0	0	0	0	0	0	0	0	0	0	0	0	0	0	0	0	0	0	0	0	0	0	0	0	0	0	1	3	0	0	0	8	8	8	1	0	0	0	17	16	20	18	4	3	18	2
19817	0	0	0	0	0	0	0	0	0	0	0	0	0	0	0	0	0	0	0	0	0	0	0	0	0	0	0	0	0	0	0	0	0	0	0	0	0	0	0	72	123	0	0	0	0	0	0	0	0
19824	0	0	0	0	0	0	0	0	0	0	0	0	0	0	0	4	7	0	0	0	17	0	0	0	0	0	0	0	0	0	0	0	0	0	0	0	0	0	0	0	0	0	0	0	0	0	0	0	0
19854	1	0	1	0	14	2	5	5	2	0	0	0	2	0	0	0	0	0	4	0	0	0	0	1	1	2	0	1	0	0	0	0	0	0	0	0	0	0	0	0	0	0	0	0	0	0	0	0	0
19876	0	0	0	0	0	0	0	0	0	2	0	0	0	1	0	0	0	0	0	0	0	0	0	0	0	0	0	0	0	0	0	0	0	0	0	0	0	0	0	0	0	60	75	56	2	0	4	0	5
19891	0	0	0	0	0	0	0	0	0	0	0	0	0	0	0	9	0	0	0	1	0	5	8	2	0	0	0	0	0	0	0	0	0	0	0	0	0	0	0	0	0	0	0	0	0	0	0	0	0
19915	0	0	0	0	0	0	0	0	0	0	0	0	0	8	44	0	0	0	0	0	0	0	9	0	0	0	0	0	0	0	0	0	0	0	0	0	0	20	8	0	0	0	0	0	0	0	0	0	0
19950	0	0	0	0	0	0	0	0	0	0	0	0	0	0	0	0	34	0	0	0	0	0	0	0	0	0	0	0	0	0	0	0	0	0	0	0	0	0	0	0	0	0	0	0	0	0	0	0	0
19952	0	0	0	0	0	0	0	0	0	0	0	0	0	0	0	1	0	0	0	0	0	0	0	0	0	0	0	0	0	0	0	0	0	0	0	0	0	0	0	0	0	0	0	0	0	0	0	0	0
19959	62	0	8	0	0	0	0	0	0	18	10	133	0	1	76	0	0	0	0	0	0	0	3	0	0	0	0	0	0	101	179	4	268	221	11	39	4	1	0	0	0	0	0	0	26	16	18	3	66
19965	0	0	0	7	101	49	85	23	5	0	0	0	23	0	0	0	0	0	0	0	0	0	0	0	0	0	0	0	0	0	0	0	0	0	0	0	0	0	0	0	0	0	0	0	0	0	0	0	0
19969	4	2	0	1	0	0	0	0	0	9	11	0	0	0	3	0	0	0	0	0	0	0	2	0	0	0	0	0	0	2	2	54	13	21	9	8	4	0	0	5	4	3	2	2	1	0	0	0	2
20010	75	3	244	0	0	0	0	0	0	24	1	136	0	6	1	0	0	0	0	0	0	0	0	0	0	0	0	0	0	0	0	0	3	1	65	29	7	31	5	0	0	0	0	0	4	2	5	7	1
20033	0	0	0	0	0	0	0	0	0	0	0	0	0	0	0	0	52	0	0	0	0	0	0	0	0	0	0	0	0	0	0	0	0	0	0	0	0	0	0	0	0	0	0	0	0	0	0	0	0
20061	85	20	21	0	0	0	0	0	0	9	9	7	0	0	20	0	0	0	0	0	0	0	1	0	0	0	0	0	0	49	76	7	76	105	221	221	224	5	2	0	0	0	2	0	2	3	1	2	5
20123	0	0	0	0	0	0	0	0	0	0	0	0	0	0	0	0	1	1	20	4	1	3	0	14	0	4	0	2	0	0	0	0	0	0	1	0	1	0	0	0	0	0	0	0	0	0	1	0	0
20155	0	0	0	3	4	3	7	2	1	0	0	0	1	0	0	0	0	0	0	0	0	0	0	0	0	0	0	0	0	0	0	0	0	0	2	5	8	0	0	0	0	1	1	1	9	9	13	7	13
20159	2	0	0	0	0	0	0	0	0	0	0	0	0	0	0	0	0	0	0	0	0	0	0	0	0	0	0	0	0	97	58	0	2	1	0	0	0	5	72	0	0	0	0	0	0	0	0	0	0
20221	0	0	0	5	19	2	15	2	1	0	0	0	0	0	0	3	0	6	143	9	1	1	0	2	0	0	0	0	0	0	0	0	0	0	1	1	4	0	0	0	0	0	0	0	0	0	0	0	0
20248	0	0	0	0	0	0	0	0	0	0	0	0	0	0	0	0	0	0	0	66	0	0	0	0	0	0	0	0	0	0	0	0	0	0	0	0	0	0	0	0	0	0	0	0	0	0	0	0	0
20258	0	0	0	0	0	0	0	0	0	0	0	0	0	0	0	0	1	0	7	0	5	15	0	8	0	0	1	30	1	0	0	0	0	0	0	0	0	0	0	0	0	0	0	0	4	3	4	2	1
20291	0	1	0	7	0	78	38	6	14	0	0	0	2	2	1	0	0	0	0	2	0	0	0	0	0	0	0	0	0	0	0	0	0	0	0	0	0	5	0	0	0	1	0	0	0	0	0	1	0
20306	0	0	0	0	0	0	0	0	0	0	0	0	0	0	0	0	0	40	4	0	0	0	0	0	0	3	0	0	0	0	0	0	0	0	0	0	0	0	0	0	0	0	0	0	0	0	0	0	0
20314	3	13	1	110	121	436	340	181	113	0	0	6	24	0	0	0	0	0	0	0	0	0	0	0	0	0	0	0	0	21	18	0	1	4	118	79	220	1	0	0	0	61	76	40	349	684	342	512	305
20345	0	0	0	0	11	1	6	28	3	0	0	0	1	0	0	0	0	0	0	0	0	0	0	0	0	0	0	0	0	0	0	0	0	0	0	0	0	0	0	0	0	0	0	0	0	0	0	0	0
20348	0	0	0	0	0	8	23	0	0	0	0	0	0	0	0	0	2	0	0	0	0	0	0	0	0	0	0	0	0	0	0	0	0	0	0	0	0	0	0	0	0	0	0	0	0	0	1	0	0
20380	0	0	0	0	0	0	0	0	0	0	0	0	0	0	0	0	0	0	0	0	0	0	0	0	0	0	0	0	0	0	0	0	0	0	0	0	0	0	0	25	124	0	0	0	0	0	0	0	0
20381	0	0	0	0	0	0	0	0	0	17	28	0	0	0	0	0	0	0	0	0	0	0	0	0	0	0	0	0	0	0	0	9	0	0	0	0	0	0	0	0	0	0	0	0	0	0	0	0	0
20410	0	0	0	0	0	0	0	0	0	0	0	0	0	0	0	0	0	0	0	0	0	0	0	0	0	0	0	0	0	0	0	0	0	0	0	0	0	0	0	66	42	0	0	0	0	0	0	0	0
20423	22	12	2	40	430	591	601	502	627	0	0	2	986	2	0	6	0	0	154	198	0	0	25	513	0	0	0	0	0	0	1	0	1	0	29	34	78	0	0	0	0	2	0	0	0	0	0	0	0
20439	0	0	0	0	0	0	0	0	0	0	0	0	0	0	0	0	42	0	0	0	0	0	0	0	0	0	0	2	1	0	0	0	0	0	0	0	0	0	0	0	0	0	0	0	0	0	0	0	0
20457	3	0	1	1	0	0	0	0	0	14	49	2	0	0	0	0	0	0	0	0	0	0	9	0	0	0	0	0	0	9	6	0	12	35	1	5	0	2	0	1	0	29	6	7	0	0	0	0	0
20481	0	0	0	0	0	0	0	0	0	42	53	2	0	0	0	0	0	0	0	0	0	0	0	0	0	0	0	0	0	0	0	21	0	0	0	1	0	0	0	0	0	0	0	0	0	0	0	0	0
20498	0	0	0	0	0	0	0	0	0	0	0	0	0	0	0	0	4	0	0	0	9	0	0	0	0	0	0	0	0	0	0	0	0	0	0	0	0	0	0	0	0	0	0	0	0	0	0	0	0
20547	0	0	0	1	14	8	1	6	5	0	0	0	5	0	0	6	39	3	3	1	6	77	5	16	43	23	19	57	3	0	0	0	0	0	0	0	1	3	0	0	0	0	0	0	1	1	0	1	0
20554	2	0	0	0	1	0	0	0	0	0	0	0	0	1	0	0	0	15	31	2	0	0	1	0	0	0	0	0	0	0	0	0	1	0	0	0	0	0	0	2	15	2	0	5	0	0	0	0	1
20608	0	0	0	0	0	0	0	0	0	0	0	0	0	0	0	0	0	0	0	0	0	0	0	4	0	0	0	0	0	0	0	0	0	0	0	0	0	0	0	0	0	0	0	0	0	0	0	0	0
20617	0	0	0	0	0	0	0	0	0	0	0	0	0	0	0	0	0	0	0	0	0	0	0	0	23	60	32	106	22	0	0	0	0	0	0	0	0	0	0	0	0	0	0	0	0	0	0	0	0
20645	0	0	0	4	23	5	23	4	9	0	0	0	28	0	0	0	0	0	0	0	0	0	1	0	0	0	0	0	0	0	2	0	0	0	3	4	5	4	0	0	0	0	0	1	0	2	0	0	0
20651	0	0	0	0	0	0	0	0	0	0	0	0	0	0	0	320	30	4	12	9	22	11	0	4	0	0	0	0	0	0	0	0	0	0	0	0	0	0	0	0	0	0	0	0	0	0	0	0	0
20655	0	0	0	0	0	0	0	0	0	1	1	3	0	0	0	0	0	0	0	0	0	0	0	0	0	0	0	0	0	0	0	0	2	7	0	0	0	0	0	0	0	22	21	4	1	3	2	0	2
20680	2	5	1	1	0	0	0	0	1	0	0	0	0	3	0	0	0	0	0	0	0	0	42	0	0	0	0	0	0	23	8	2	24	15	0	6	1	1	2	0	0	3	0	0	0	1	0	0	0
20713	0	0	0	0	0	0	0	0	0	0	0	0	0	0	0	0	0	0	0	0	0	0	0	0	0	0	0	0	0	0	0	0	0	0	0	0	0	0	0	0	0	0	0	0	0	0	0	0	0
20760	0	0	0	0	0	0	0	0	0	0	0	0	0	0	0	2	0	8	2	0	3	27	5	6	0	0	0	0	0	0	0	0	0	0	0	0	0	0	0	0	0	0	0	0	1	3	5	4	4
20782	1	0	0	0	1	16	7	0	1	0	1	0	183	0	0	0	0	0	0	0	0	0	0	0	0	0	0	0	0	0	0	0	0	0	0	0	0	0	0	0	0	0	0	0	0	0	0	0	0
20839	0	0	0	0	0	0	0	0	0	0	0	0	0	0	0	0	98	0	0	0	0	0	0	0	0	0	5	0	0	0	0	0	0	0	0	0	0	0	0	0	0	0	0	0	0	0	0	0	0
20924	0	0	0	0	0	0	0	0	0	0	0	0	0	0	0	3	8	0	49	0	15	7	37	10	0	0	0	0	0	0	0	0	0	0	0	0	0	0	0	0	0	0	0	0	0	0	0	0	0
20933	0	0	0	0	0	0	0	0	0	0	0	0	0	0	0	9	26	0	0	0	10	100	1	1	0	0	0	0	0	0	0	0	0	0	0	0	0	0	0	0	0	1	2	0	5	3	2	3	1
20971	0	0	0	0	0	0	0	0	0	0	0	0	0	0	0	46	0	2	408	389	0	0	11	39	0	0	0	0	0	0	0	0	0	0	0	0	0	1	0	0	0	0	0	0	0	0	0	0	0
20977	0	0	0	0	0	0	0	0	0	0	0	0	0	0	0	0	0	0	0	0	0	0	0	0	0	0	0	0	0	0	0	0	0	0	0	0	0	0	0	0	0	0	0	0	0	0	0	0	0
20989	0	0	0	0	0	0	0	0	0	0	0	0	0	0	0	13	0	0	0	0	0	0	0	0	0	0	0	0	0	0	0	0	0	0	0	0	0	0	0	0	0	18	16	12	8	28	2	8	14
20991	0	0	0	0	0	0	0	0	0	0	0	0	0	0	0	0	1	0	2	0	0	0	0	0	0	0	0	0	0	0	0	0	0	0	0	0	1	0	0	0	0	0	0	0	0	0	0	0	0
21000	0	0	0	0	0	0	0	0	0	0	0	0	0	0	0	3	0	17	140	67	0	0	0	52	0	0	0	0	0	0	0	0	0	0	0	0	4	4	0	0	0	0	0	0	0	0	0	0	0
21085	0	0	0	26	4	1	9	13	0	0	0	0	0	0	0	0	0	0	0	0	0	0	0	0	0	0	0	0	0	0	0	0	0	0	0	0	0	0	0	0	0	0	0	0	0	0	0	0	0
21146	22	3	31	0	0	0	0	1	2	0	0	0	0	1	0	0	0	0	4	0	0	0	0	1	0	0	0	0	0	3	4	1	1	1	2	1	4	4	1	0	0	0	0	0	0	0	3	0	1
21162	0	0	0	0	0	0	0	0	0	0	0	0	0	0	0	1	1	5	0	1	1	8	1	1	5	0	1	5	1	0	0	0	1	1	0	0	1	0	0	0	0	0	2	0	3	3	6	4	2
21182	0	1	1	0	1	25	7	0	7	0	0	2	203	1	0	4	0	0	0	0	7	219	12	1	0	0	0	0	0	10	10	1	2	0	6	5	9	13	1	0	0	1	1	3	0	0	0	0	0
21228	0	0	0	0	0	0	0	0	0	0	0	0	0	0	0	4	11	20	2	8	18	1	4	23	16	2	4	18	50	0	0	0	0	0	0	0	0	0	0	0	0	0	0	0	1	1	6	4	0
21260	215	9	2	1	0	0	0	0	1	17	2	460	0	66	208	0	0	0	0	0	0	0	58	0	0	0	0	1	0	15	36	417	0	2	113	104	34	742	187	0	0	0	0	0	22	6	11	9	28
21298	0	0	0	0	0	0	2	0	0	0	0	0	6	0	0	1	15	1	3	2	0	2	209	45	0	0	0	0	0	0	0	0	0	0	0	0	0	0	0	0	0	0	0	0	0	0	0	0	0
21341	0	0	0	0	0	0	0	0	0	0	0	0	0	0	0	0	0	0	0	0	0	0	0	0	0	0	0	0	0	0	0	0	0	0	0	0	0	0	0	0	0	0	0	0	0	0	0	0	0
21394	2	2	0	0	40	20	40	0	1	0	1	0	148	0	0	0	0	0	0	0	0	0	0	0	0	0	0	0	0	0	0	0	0	0	0	0	0	0	0	0	0	0	0	0	0	0	0	0	0
21400	0	0	0	0	0	0	0	0	0	2	15	1	0	0	6	0	0	2	3	0	0	0	17	0	0	0	0	0	0	0	0	2	1	5	1	1	2	0	0	23	23	30	5	26	0	1	0	1	2
21427	0	0	0	0	0	0	0	0	0	0	0	0	0	0	0	0	0	0	0	0	0	0	0	0	0	0	0	10	70	0	0	0	0	0	0	0	0	0	0	0	0	0	0	0	0	0	0	0	0
21459	0	0	0	0	0	0	0	0	0	0	0	0	0	0	0	0	0	0	0	0	0	0	0	0	0	0	0	0	0	0	0	0	0	0	0	0	0	0	0	0	0	0	0	0	0	0	0	0	0
21478	0	0	0	0	0	0	0	0	0	0	0	0	0	0	0	6	28	0	0	0	1	9	12	0	0	0	0	4	3	0	0	0	0	0	0	0	0	0	0	0	0	0	0	0	1	0	1	0	0
21529	9	17	2	0	163	28	25	18	10	0	0	3	0	0	0	0	0	0	0	0	0	0	0	0	0	0	0	0	0	2	0	0	0	0	2	0	0	7	0	0	0	0	1	0	1	2	3	4	1
21629	0	1	1	0	10	16	20	28	7	0	0	1	0	0	0	0	0	0	0	0	0	0	0	0	0	1	0	1	0	0	1	0	0	0	35	43	38	112	1	0	0	5	5	5	0	3	0	0	1
21636	0	0	0	0	0	0	0	0	0	0	75	0	0	0	0	0	0	0	0	0	0	0	0	0	0	0	0	0	0	0	0	1	1	0	0	0	0	0	0	0	0	0	2	0	0	0	0	0	1
21654	0	0	0	0	0	0	0	0	0	0	1	0	0	0	0	0	0	0	0	0	0	0	0	0	0	0	0	0	0	0	0	0	0	0	0	0	0	0	0	0	0	131	37	124	0	1	0	0	0
21663	0	19	0	0	0	0	0	1	0	2	0	0	0	2	0	13	0	4	16	0	0	0	2	0	0	0	0	0	0	0	0	0	0	1	0	0	4	2	0	0	0	0	1	0	21	7	8	8	3
21737	0	0	0	0	0	0	0	0	0	0	0	0	0	0	0	0	0	1	0	0	56	2	0	0	0	0	0	0	0	0	0	0	0	0	0	0	0	0	0	0	0	0	0	0	0	0	0	0	0
21779	3	16	5	3	0	0	0	0	0	0	0	21	0	0	0	0	0	1	0	0	0	0	0	0	0	0	0	0	0	1	2	0	2	4	4	7	4	0	0	0	0	10	0	13	5	13	2	9	24
21841	2	0	0	0	0	0	0	0	0	0	4	0	3	4	12	5	7	28	1	1	13	83	115	8	6	12	3	11	0	0	0	5	6	4	1	0	0	6	34	7	9	0	0	0	0	0	0	0	0
21869	0	0	0	0	0	0	0	0	0	0	0	0	0	0	0	3	0	13	35	3	0	0	3	6	0	0	0	0	0	0	0	0	0	0	0	0	0	0	0	0	0	0	0	0	0	0	0	0	0
21905	0	0	0	0	3	1	6	0	4	0	0	0	10	0	0	4	197	1	19	1	7	63	61	8	20	10	3	45	26	0	1	0	0	0	0	0	0	0	0	0	0	0	1	0	1	1	5	10	1
21915	0	0	0	0	0	0	0	0	0	0	0	0	0	0	0	0	18	0	0	0	0	0	0	0	0	0	0	0	0	0	0	0	0	0	0	0	0	3	0	0	0	0	0	0	4	37	0	3	19
21923	0	0	0	0	1	0	0	1	0	0	0	0	0	0	0	2	3	1	4	1	3	0	1	2	8	4	1	19	0	0	1	0	0	0	0	0	0	0	0	0	0	0	0	0	0	1	1	1	0
21946	0	0	0	0	0	0	0	0	0	0	0	0	0	0	0	7	0	1	376	28	0	0	0	11	30	493	14	7	0	0	0	0	0	0	0	0	0	0	0	0	0	0	0	0	0	0	0	0	0
21957	0	0	0	0	0	0	0	0	0	0	0	0	0	0	0	2	0	0	0	0	0	4	0	0	0	0	0	0	0	0	0	0	0	0	0	0	0	0	0	0	0	0	0	0	0	0	0	0	0
21998	0	1	0	2	11	9	12	5	7	0	0	0	21	0	0	0	0	0	0	0	0	0	0	0	0	0	0	0	0	0	0	0	0	0	0	0	0	0	0	0	0	0	0	0	0	0	0	0	0
21999	0	0	0	0	0	0	0	0	0	0	0	0	0	0	0	0	0	0	0	0	0	0	0	0	0	0	0	0	0	0	0	0	0	0	5	3	6	0	0	0	0	1	2	0	1	42	0	3	19
22019	24	4	6	6	0	0	0	0	0	0	0	13	0	12	31	0	0	17	73	0	0	0	4	2	0	0	0	0	0	3	1	0	1	0	0	0	5	16	1	0	0	1	3	3	61	69	24	88	40
22030	0	0	0	0	0	0	0	0	0	0	0	0	0	0	0	0	0	0	0	0	0	0	0	0	0	0	0	0	0	0	0	0	0	0	0	0	0	0	0	207	267	0	2	0	0	0	0	0	0
22066	0	0	0	0	0	0	0	0	0	0	0	0	0	0	0	0	0	0	0	0	0	0	0	0	0	1	0	0	0	0	0	0	0	0	0	0	0	0	0	0	0	0	0	0	0	0	0	0	0
22067	0	0	0	17	2	1	2	5	8	1	0	3	2	0	0	7	12	0	33	0	3	195	70	54	14	0	4	0	169	4	2	0	0	3	5	2	3	12	5	0	0	13	28	8	4	16	2	5	6
22081	1	10	0	5	0	0	0	3	1	0	0	1	0	1	5	0	0	1	6	0	0	0	0	0	0	0	0	0	0	0	4	0	1	1	8	0	8	0	0	0	0	1	3	1	3	9	3	1	5
22082	37	4	11	0	0	0	0	1	0	177	68	224	0	1	3	0	0	0	0	0	0	0	0	0	0	0	0	0	0	205	128	274	86	107	193	130	102	1	8	0	0	20	6	9	1	0	0	0	2
22109	0	0	0	1	0	0	0	0	0	0	0	0	0	0	0	4	0	1	1	0	8	26	6	0	2	0	1	6	2	0	0	0	0	0	0	0	0	0	0	0	0	0	0	0	0	0	1	1	0
22195	0	0	0	0	0	0	0	0	0	0	0	0	0	0	0	0	0	0	0	0	0	0	0	0	0	0	0	0	0	0	0	0	0	0	0	0	0	0	0	528	1038	0	0	0	0	0	0	0	0
22226	0	0	0	0	0	0	0	0	0	0	0	0	0	0	0	0	0	0	142	56	2	34	0	0	0	0	0	0	0	0	0	0	0	0	0	0	0	0	0	0	0	0	0	0	0	0	0	0	0
22262	0	0	0	0	0	0	0	0	0	2	3	0	0	0	0	0	0	3	7	0	0	0	57	0	0	0	0	0	0	0	0	0	0	0	0	0	0	0	0	0	0	0	0	0	0	0	0	0	0
22274	0	0	0	0	0	0	0	0	0	0	0	0	0	0	0	23	0	0	0	0	195	855	0	0	0	0	0	0	0	0	0	0	0	0	0	0	0	0	0	0	0	0	0	0	654	139	694	445	0
22310	0	0	0	0	0	0	0	0	0	0	0	0	0	0	0	2	0	26	125	0	0	42	0	0	1	0	0	0	0	0	0	0	0	0	0	0	0	0	0	0	0	0	0	0	0	0	0	0	0
22316	0	0	0	0	0	0	0	0	0	0	0	0	2	0	0	5	4	0	25	0	0	1	0	0	0	0	0	0	0	0	0	0	0	0	0	0	0	0	0	0	0	0	0	0	0	0	0	0	0
22394	1	28	0	4	0	0	0	1	0	0	0	0	0	2	1	0	0	1	8	0	0	0	0	3	0	0	0	0	0	0	2	0	0	0	1	0	1	1	1	0	0	0	0	0	0	2	1	0	1
22411	0	2	3	2	0	0	0	0	1	0	0	0	0	5	0	0	4	33	84	0	0	0	1	7	0	0	0	0	0	1	1	0	1	12	2	4	0	2	1	0	0	0	0	0	4	1	1	1	1
22474	0	0	0	0	0	0	0	0	0	0	0	0	0	0	0	0	0	0	0	0	0	0	0	0	0	0	0	0	0	0	0	0	0	0	0	0	0	0	0	0	0	0	0	0	0	0	0	0	0
22496	0	0	0	0	0	0	0	0	0	0	0	0	0	0	0	0	0	0	0	0	0	2	0	0	0	0	0	0	0	0	0	0	0	0	0	0	0	0	0	0	0	0	0	0	0	0	0	0	0
22540	0	0	0	0	0	0	0	0	0	0	0	0	0	0	0	0	10	0	0	0	1	0	0	0	0	0	0	0	0	0	0	0	0	0	0	0	0	0	0	0	0	0	0	0	0	0	0	0	0
22589	600	2060	418	216	0	0	0	105	112	50	53	300	0	320	291	0	0	151	1629	0	0	0	172	71	0	0	0	0	0	347	716	42	379	717	585	630	557	990	146	0	0	8	7	6	158	489	241	87	237
22699	0	0	0	0	0	0	0	0	0	46	19	0	0	0	0	0	0	0	0	0	0	0	0	0	0	0	0	0	0	0	0	0	0	1	0	0	0	0	0	0	0	8	7	3	0	0	0	0	0
22703	0	0	0	0	0	0	0	0	0	0	0	0	0	0	0	0	4	1	0	0	0	0	0	0	0	0	0	0	0	0	0	0	0	0	0	0	0	0	0	0	0	0	0	0	0	0	0	0	0
22716	0	0	0	0	0	0	0	0	0	0	0	0	0	2	0	0	0	6	3	12	0	41	7	10	0	0	0	0	0	0	0	0	0	0	0	0	0	0	0	0	0	0	0	0	0	0	0	0	0
22717	0	0	0	0	0	0	0	0	0	5	8	0	0	0	0	0	0	0	0	0	0	0	0	0	0	0	0	0	0	0	0	76	1	2	0	0	0	0	0	0	0	0	0	0	0	0	0	0	0
22729	0	0	0	0	0	0	0	0	0	0	0	0	0	0	0	1	0	0	0	0	0	53	0	2	0	0	0	0	0	0	0	0	0	0	0	0	0	0	0	0	0	0	0	0	0	0	0	0	0
22781	0	0	0	0	0	10	5	0	4	0	0	0	6	0	0	2	0	0	3	0	0	42	4	4	6	1	4	3	6	2	0	0	0	0	0	1	2	1	0	0	0	0	0	0	2	0	1	0	0
22803	2	1	0	0	0	0	0	0	0	34	26	0	0	1	5	0	0	0	0	0	0	0	0	0	0	0	0	0	0	1	1	37	11	27	5	3	1	2	0	0	1	5	13	1	0	0	1	0	3
22809	0	0	0	0	0	0	0	0	0	0	0	0	0	0	0	0	0	3	0	0	0	0	0	0	0	0	0	0	0	0	0	0	0	0	0	0	0	0	0	0	0	0	0	0	0	0	0	0	0
22835	0	0	0	0	0	0	1	0	2	0	0	0	1	0	0	0	3	0	8	0	0	0	5	0	8	0	0	4	5	0	0	0	0	0	0	0	4	0	0	0	0	0	1	1	4	2	7	9	3
22838	0	0	0	0	0	0	0	0	0	0	0	0	0	0	0	0	0	0	0	0	0	0	0	0	0	0	0	0	0	0	0	0	0	0	0	0	0	0	0	0	0	0	0	0	0	0	0	0	0
22863	0	0	0	1	0	4	8	0	0	0	0	0	220	1	0	0	0	0	0	0	0	0	0	3	0	0	0	0	0	0	0	0	0	0	0	0	0	0	0	0	0	0	0	0	0	0	0	0	0
22924	0	0	0	0	0	0	0	0	0	0	0	0	0	0	0	0	20	0	0	0	0	0	0	1	3	0	0	0	0	0	0	0	0	0	0	0	0	1	0	0	0	0	1	0	0	0	0	0	0
22930	0	0	0	0	0	0	0	0	0	0	0	0	0	0	0	0	4	0	0	0	0	309	10	0	0	0	0	0	0	0	0	0	0	0	0	0	0	0	0	0	0	0	0	0	0	0	0	0	0
22953	0	0	0	0	0	5	7	0	0	0	0	0	6	0	0	1	0	11	8	3	3	374	1	40	2	0	0	4	0	8	3	2	3	1	2	4	4	95	7	0	0	0	3	2	5	1	4	2	2
22991	0	0	0	0	0	0	0	0	0	0	0	0	0	0	0	0	0	0	0	0	15	0	0	0	0	0	0	0	0	0	0	0	0	0	0	0	0	0	0	0	0	0	0	0	10	3	21	21	1
23006	0	0	0	0	0	0	0	0	0	0	0	0	0	0	0	0	0	0	1	0	0	19	0	3	1	0	0	2	4	0	0	0	0	0	0	0	0	0	0	0	0	0	0	0	3	2	11	24	0
23028	0	0	0	0	0	0	0	0	0	0	0	0	0	0	0	1	0	12	15	17	1	0	0	0	0	1	0	0	0	0	0	0	0	0	0	0	0	0	0	0	0	0	0	0	0	0	0	0	0
23069	0	0	0	4	8	2	15	6	7	0	0	0	5	0	0	0	0	0	0	0	0	0	0	0	0	0	0	0	0	0	1	0	0	0	0	0	0	0	0	0	0	0	0	0	0	2	0	0	0
23094	0	0	0	0	0	0	0	0	0	0	0	0	0	0	0	0	0	0	1	0	0	1	0	3	0	0	0	0	0	0	0	0	0	0	0	0	0	0	0	0	0	0	0	0	0	0	0	0	0
23112	0	0	0	0	0	0	0	0	0	0	0	0	0	0	0	0	0	0	1	1	0	0	20	85	0	0	0	0	0	0	0	0	0	0	0	0	0	0	0	0	0	0	0	0	0	0	0	0	0
23141	0	0	0	0	0	4	8	0	0	0	0	0	0	0	0	41	28	28	0	0	0	232	0	1	0	0	0	1	3	0	0	0	0	0	0	0	0	0	0	0	0	0	0	0	0	0	0	0	0
23144	0	0	0	0	5	0	0	0	2	0	0	0	93	0	0	10	20	8	8	6	83	12	0	5	2	20	4	37	54	0	0	0	0	0	0	0	1	0	0	0	0	1	1	0	0	0	6	6	0
23148	0	0	0	0	0	0	0	0	0	0	0	0	0	0	0	0	0	0	0	0	2	0	0	0	0	0	0	1	0	0	0	0	0	0	0	0	0	0	0	0	0	0	0	0	1	0	0	2	0
23232	0	0	0	0	0	0	0	0	0	0	0	0	0	0	0	0	0	0	0	0	1	1	3	1	0	0	0	0	0	0	0	0	0	0	0	0	0	0	0	0	0	0	0	0	0	0	0	0	0
23235	0	0	2	0	0	0	0	0	0	16	25	0	0	0	1	0	0	0	0	0	0	0	3	0	0	0	0	0	0	0	0	24	0	0	0	1	0	0	0	0	0	0	0	0	0	0	0	0	0
23253	0	0	0	0	0	0	0	0	0	0	0	0	0	0	0	0	1	0	0	0	0	0	0	0	0	0	0	0	0	0	0	0	0	0	0	0	0	0	0	0	0	0	0	0	0	0	0	0	0
23270	0	0	0	0	0	0	0	0	0	0	0	0	0	0	0	0	0	0	0	0	0	0	0	0	0	0	0	0	0	0	0	0	0	0	0	0	0	0	0	293	147	0	0	0	0	0	0	0	0
23283	0	0	0	0	0	0	0	0	0	0	0	0	0	0	0	0	0	0	0	0	0	0	0	0	0	0	0	0	0	0	0	0	0	0	0	0	0	0	0	49	49	0	0	0	0	0	0	0	0
23293	0	0	0	0	0	0	0	0	0	0	0	0	0	0	0	0	0	0	0	31	0	0	0	0	0	0	0	0	0	0	0	0	0	0	0	0	0	0	0	0	0	0	0	0	0	0	0	0	0
23315	0	0	0	0	0	0	0	0	0	0	0	0	0	0	0	4	0	0	31	0	0	0	0	0	2	0	1	0	1	0	0	0	0	0	0	0	0	0	0	0	0	0	0	0	0	0	0	0	0
23325	0	0	0	0	0	0	0	0	0	0	0	0	0	0	0	0	0	0	1	12	0	0	0	0	0	0	0	0	0	0	0	0	0	0	0	0	0	0	0	0	0	0	0	0	0	0	0	0	0
23334	0	0	0	0	0	0	0	0	0	0	0	0	0	0	0	16	0	0	8	0	0	0	0	4	0	0	0	0	0	0	0	0	0	0	0	0	0	0	0	0	0	0	0	0	10	2	21	17	0
23335	0	0	0	0	0	0	0	0	0	0	0	0	0	0	0	0	0	0	0	0	0	0	0	0	0	0	0	0	0	0	0	0	0	0	0	0	0	0	0	0	0	0	0	0	0	0	0	0	0
23338	2	1	1	0	0	0	0	0	0	73	37	2	0	0	12	0	0	0	0	0	0	0	7	0	0	0	0	0	0	6	4	13	6	19	14	7	15	33	7	0	0	1	3	0	1	2	5	4	15
23399	0	1	0	6	31	1	17	14	31	0	0	0	8	0	0	1	4	0	0	0	3	12	2	2	2	1	3	5	1	0	0	0	0	0	0	0	1	1	0	0	0	3	4	7	1	1	1	3	0
23423	0	2	0	8	2	2	3	0	3	0	0	1	14	0	2	0	0	0	0	0	0	27	0	0	0	0	0	0	0	1	0	4	0	0	2	7	3	2	0	0	0	5	5	3	2	6	5	24	8
23528	0	0	0	0	0	0	0	0	0	0	0	0	0	0	0	0	0	12	0	0	1	4	1	4	9	9	2	20	1	0	0	0	0	0	0	0	0	0	0	0	0	0	0	0	0	0	0	0	0
23586	0	0	0	0	0	0	0	0	0	0	0	0	0	0	0	41	24	8	39	0	29	0	6	50	0	0	0	0	0	0	0	0	0	0	0	0	0	0	0	0	0	0	0	0	0	0	0	0	0
23595	0	0	0	0	0	0	0	0	0	0	0	0	0	0	0	1	0	41	22	0	1	0	0	0	0	0	0	0	0	0	0	0	0	0	0	0	0	0	0	0	0	0	0	0	0	0	0	0	0
23597	0	0	0	0	0	0	0	0	0	0	0	0	0	0	0	0	8	0	0	0	0	0	0	0	0	1	0	0	0	0	0	0	0	0	0	0	0	0	0	0	0	0	0	0	0	0	0	0	0
23601	0	0	0	0	0	0	0	0	0	6	7	2	0	2	0	0	0	0	0	0	0	0	1	1	0	0	0	0	0	0	0	49	1	0	0	0	0	1	0	0	0	0	0	0	0	0	1	0	0
23626	0	4	1	7	0	0	0	1	2	1	0	2	0	7	20	0	0	35	47	0	0	0	5	56	0	0	0	0	0	4	3	2	0	1	4	20	8	9	12	0	0	1	0	0	1	1	2	1	3
23637	0	0	0	0	0	0	0	0	0	0	0	0	0	0	0	0	0	0	0	0	0	0	0	0	0	0	0	0	0	0	0	0	0	0	0	0	0	0	0	0	0	0	0	0	0	0	0	0	0
23682	0	0	0	0	0	0	0	0	0	0	0	0	0	0	0	0	18	0	0	0	10	16	4	3	0	0	0	0	0	0	0	0	0	0	0	0	0	3	0	0	0	0	0	1	0	0	0	0	0
23698	3	1	0	6	0	0	0	2	1	0	0	0	0	7	0	4	0	67	58	0	0	0	1	1	0	0	0	0	0	1	0	0	0	0	0	0	0	2	0	0	0	2	0	0	0	0	0	0	0
23699	0	0	0	0	0	0	0	0	0	0	91	1	0	0	0	0	0	0	0	0	0	0	11	0	0	0	0	0	0	0	0	0	0	0	0	0	0	0	0	0	0	0	0	0	0	0	0	0	0
23720	0	0	0	16	72	6	4	26	9	0	0	4	23	0	0	2	4	0	1	0	6	0	6	5	9	0	0	10	8	0	0	0	0	0	0	0	0	0	0	0	0	0	0	0	0	0	1	1	0
23745	0	0	0	1	1	12	6	4	5	0	0	0	17	0	0	0	0	0	0	0	0	0	0	0	0	0	0	0	0	0	0	0	0	0	0	0	0	0	0	0	0	0	0	0	1	0	1	2	0
23805	0	0	0	0	2	0	0	0	0	0	0	0	2	0	0	2	2	8	18	6	1	0	1	4	2	10	0	26	3	0	0	0	0	0	0	0	0	0	0	0	0	0	0	0	1	0	0	0	1
23839	0	0	0	0	0	0	0	0	0	0	0	0	0	3	0	0	0	0	0	0	0	0	0	0	0	0	0	0	0	0	0	0	0	0	0	0	0	0	0	64	145	0	1	0	0	0	0	0	0
23878	179	0	0	0	0	0	0	0	0	0	0	0	0	2	3	0	0	0	0	0	0	0	0	0	0	0	0	0	0	0	0	0	0	0	0	0	0	0	0	0	0	0	0	0	0	0	0	0	0
23880	0	0	0	0	0	0	0	0	0	0	0	0	0	1	0	0	0	176	104	44	0	22	10	4	0	0	0	0	0	0	0	0	0	0	0	0	0	0	0	0	0	0	0	0	0	0	0	0	0
23902	0	0	0	0	0	2	1	0	0	0	0	0	0	0	0	0	1	0	0	0	0	0	2	5	1	2	0	3	0	0	0	0	0	0	0	0	0	0	0	0	0	0	0	0	0	0	0	0	0
23929	0	0	0	0	0	0	0	0	0	11	10	0	0	0	0	0	0	0	0	0	0	0	0	0	0	0	0	0	0	0	0	42	0	0	0	0	0	0	0	0	0	0	0	0	0	0	0	0	0
23994	0	0	0	0	0	0	0	0	0	0	0	0	0	0	0	0	0	1	0	0	0	0	1	79	0	0	0	0	0	0	0	0	0	0	0	0	0	0	0	0	0	0	0	0	0	2	1	0	2
24008	0	0	0	0	0	0	0	0	0	0	0	0	0	0	0	2	15	27	1	1	0	18	0	0	1	4	0	5	5	0	0	0	0	0	0	0	0	0	0	0	0	0	0	0	0	0	1	1	0
24034	0	0	2	7	5	38	23	11	4	1	0	0	5	0	14	0	0	0	0	0	0	0	0	0	0	0	0	0	0	0	0	0	0	0	1	0	2	1	0	0	0	0	7	2	10	14	18	12	9
24035	0	0	0	0	0	0	0	0	0	0	0	0	0	0	0	0	284	0	0	0	0	0	0	0	0	0	0	1	0	0	0	0	0	0	0	0	0	0	0	0	0	0	0	0	0	0	0	0	0
24086	0	0	0	0	0	0	0	0	0	0	0	0	0	0	0	0	2	0	0	0	0	0	0	0	0	0	0	0	48	0	0	0	0	0	0	0	0	0	0	0	0	0	0	0	1	0	1	0	0
24104	0	0	0	0	0	0	0	0	0	0	0	0	0	0	0	0	0	1	81	11	0	0	0	0	0	0	0	0	0	0	0	0	0	0	0	0	0	0	0	0	0	0	0	0	0	0	0	0	0
24127	0	0	0	1	0	0	0	0	4	0	0	0	0	0	0	4	2	30	109	8	214	86	0	1	0	0	0	0	0	0	0	0	0	0	0	0	0	0	0	0	0	0	0	0	0	0	0	0	0
24130	0	0	0	0	0	0	0	0	0	0	0	0	0	0	0	0	0	0	0	0	1	0	0	0	2	0	129	74	0	0	0	0	0	0	0	0	0	1	1	0	0	0	0	0	0	0	0	0	0
24141	0	0	0	0	0	0	0	0	0	0	0	0	0	0	0	0	0	0	0	0	0	0	0	0	49	19	27	121	9	0	0	0	0	0	0	0	0	0	0	0	0	0	0	0	0	0	0	0	0
24161	0	0	0	0	0	0	0	0	0	0	0	0	0	0	0	1	0	0	34	4	0	0	0	5	0	0	0	0	0	0	0	0	0	0	0	0	0	26	0	0	0	0	0	0	0	0	0	0	0
24190	0	0	0	2	263	0	7	13	20	0	0	0	13	0	0	0	0	0	0	0	0	0	0	0	0	0	0	0	0	0	0	0	0	0	0	0	0	0	0	0	0	0	0	0	0	0	0	0	0
24197	0	0	0	0	0	0	0	0	0	0	0	0	0	0	0	0	48	0	0	0	0	0	0	0	0	0	0	0	0	0	0	0	0	0	0	0	0	0	0	0	0	0	0	0	0	0	2	1	1
24272	0	0	0	0	0	0	0	0	0	0	0	0	0	0	0	0	0	0	0	0	0	0	0	0	0	0	0	0	0	0	0	0	0	0	0	0	0	0	0	0	0	0	0	0	0	0	0	0	0
24352	0	0	0	0	0	0	0	0	0	0	0	0	0	0	0	0	0	0	0	0	0	0	0	0	0	0	0	0	0	0	0	0	0	0	0	0	0	0	0	0	0	37	42	4	0	0	0	0	0
24363	0	0	0	0	0	0	0	0	0	0	0	0	0	0	0	0	0	0	0	0	0	0	0	0	0	0	0	0	0	0	0	0	0	0	1	0	0	0	0	0	0	0	0	0	0	0	0	0	0
24430	8	4	59	0	0	0	0	0	0	25	2	0	0	0	0	0	0	0	0	0	0	0	0	0	0	0	0	0	0	11	8	3	7	19	37	26	30	8	5	0	0	2	1	1	0	0	0	0	0
24467	0	0	0	0	0	0	0	0	0	7	0	0	0	0	0	0	0	1	0	0	0	0	0	0	0	0	0	0	0	0	0	0	0	0	0	0	0	0	0	0	0	32	94	22	1	1	0	0	1
24495	0	0	0	0	0	0	0	0	0	0	0	0	0	0	0	0	0	0	372	7	3	550	0	0	0	0	0	0	0	0	0	0	0	0	0	0	0	0	0	0	0	0	0	0	0	0	0	0	0
24499	1	6	0	28	10	172	95	36	121	0	0	3	21	0	12	0	0	0	0	0	0	0	0	0	0	0	0	0	0	5	4	0	0	0	1	5	10	23	0	0	0	12	28	27	15	35	14	29	27
24520	0	0	0	0	0	0	0	0	0	0	0	0	0	0	0	0	0	0	0	0	0	0	0	0	0	0	0	0	0	0	0	0	0	0	0	0	0	0	0	0	0	26	126	18	0	0	0	0	0
24564	12	2	11	0	0	0	0	1	0	0	0	4	0	3	3	0	0	0	0	0	0	0	27	0	0	0	0	0	0	42	18	3	57	17	0	5	0	0	13	0	0	1	0	1	0	0	0	0	0
24574	0	0	0	0	0	0	0	0	0	0	0	0	0	0	0	0	0	0	0	0	0	0	0	0	0	0	0	0	0	0	0	0	0	0	0	0	0	0	0	0	0	0	0	0	0	0	0	0	0
24599	0	0	0	0	0	0	0	0	0	0	0	0	0	0	0	1	0	22	28	17	0	0	0	0	0	0	0	0	0	0	0	0	0	0	0	0	0	0	0	0	0	0	0	0	0	0	0	0	0
24606	0	0	0	0	0	0	0	0	0	0	0	0	0	0	0	0	1	0	0	0	0	0	0	0	3	0	0	39	9	0	0	0	0	0	0	0	0	0	0	0	0	0	0	0	0	0	0	0	0
24642	0	0	0	0	0	0	0	0	0	2	1	1	0	1	3	0	0	15	30	0	0	0	16	1	0	0	0	0	0	0	0	0	0	0	0	0	0	0	0	0	0	0	0	0	0	3	0	0	1
24671	2	10	9	0	1	0	0	0	0	0	0	2	0	0	1	0	0	0	3	0	0	0	9	0	0	0	0	0	0	2	0	0	0	0	285	114	71	0	0	0	0	54	57	33	0	1	0	0	0
24677	0	0	0	0	0	0	0	0	0	0	0	0	0	0	0	0	0	0	0	0	0	1	0	0	0	50	2	0	41	0	0	0	0	0	0	0	0	0	0	0	0	0	0	0	0	0	0	0	0
24756	0	0	0	0	0	0	0	0	0	0	0	0	0	0	0	41	55	0	0	0	0	1	0	5	0	0	0	0	0	0	0	0	0	0	0	0	0	0	0	0	0	0	0	0	0	0	0	0	0
24769	0	1	0	19	0	0	0	3	0	0	0	0	0	4	3	0	0	0	2	0	0	0	0	0	0	0	0	0	0	0	0	0	0	0	0	0	0	0	0	0	0	0	20	1	0	0	0	0	0
24773	1	1	12	0	0	0	0	0	1	0	0	0	0	1	0	0	0	6	32	0	0	0	0	0	0	0	0	0	0	1	1	0	0	0	0	0	0	9	2	0	0	0	0	0	0	0	0	0	0
24844	0	0	0	0	0	0	0	0	0	0	0	0	0	3	0	1	0	2	11	12	0	1	0	0	0	0	0	1	0	0	0	0	0	0	0	0	0	0	0	0	0	7	0	19	0	2	1	0	0
24883	0	0	0	1	18	1	7	0	3	0	0	0	26	0	0	0	0	0	0	0	0	0	0	0	2	2	0	0	0	0	0	0	0	0	0	0	0	0	0	0	0	0	0	0	0	0	0	0	0
24901	0	0	0	0	0	0	0	0	0	0	0	0	0	0	0	0	0	2	24	73	2	2	4	0	0	0	0	0	0	0	0	0	0	0	0	0	0	0	0	0	1	0	0	0	0	0	0	0	0
24908	0	0	0	0	0	0	0	0	0	0	0	0	0	0	0	0	0	0	0	0	0	0	0	0	0	0	0	0	0	0	0	0	0	0	0	0	0	0	0	71	27	1	0	0	0	0	0	0	0
24912	0	0	0	0	0	0	0	0	0	0	0	0	0	0	0	0	6	0	0	0	0	0	0	0	0	0	0	16	5	0	0	0	0	0	0	0	0	0	0	0	0	2	11	5	4	3	7	5	1
24968	0	1	0	5	4	11	14	6	31	0	0	0	25	0	0	1	12	0	3	2	0	0	0	0	0	1	1	3	1	0	0	0	0	0	0	0	0	0	0	0	0	0	0	0	3	6	7	13	1
24991	0	0	0	8	0	0	0	0	0	0	0	0	2	0	0	0	0	0	0	0	0	0	2	7	0	0	0	0	1	0	0	0	0	0	0	0	0	0	0	0	0	0	1	0	0	1	0	1	0
24998	0	0	0	0	0	0	0	0	0	0	0	0	0	0	0	1	0	3	5	0	0	0	6	19	0	0	0	0	0	0	0	0	0	0	0	0	0	0	0	0	0	0	0	0	0	0	0	0	0
25000	0	0	0	0	6	0	0	0	0	0	0	0	90	0	0	0	0	0	0	0	0	0	0	0	0	0	0	0	0	0	0	0	1	0	4	4	6	0	0	0	0	0	1	2	2	0	0	3	0
25034	6	5	3	1	92	26	21	37	8	0	0	1	110	0	0	0	0	0	0	0	0	0	0	0	0	0	0	0	0	0	0	0	0	0	0	0	0	0	0	0	0	0	0	0	0	0	0	0	0
25035	0	0	0	0	206	0	0	67	11	0	0	0	0	0	0	2	6	0	0	0	4	0	0	2	39	29	0	0	64	0	0	0	0	0	0	0	0	0	0	0	0	0	0	0	0	0	0	0	0
25067	0	6	0	0	0	0	0	0	0	0	0	2	0	8	4	0	0	16	19	0	0	0	0	0	0	0	0	0	0	1	5	0	0	0	0	2	0	6	2	0	0	0	0	0	0	0	0	0	0
25088	0	0	0	0	0	0	0	0	0	0	0	0	0	0	0	0	0	1	1	0	11	3	0	1	0	0	0	0	0	0	0	0	0	0	0	0	0	0	0	0	0	0	0	0	0	0	0	0	0
25094	0	0	0	0	0	0	1	0	0	0	0	0	0	0	0	0	0	2	0	0	0	0	8	3	0	0	0	0	0	0	0	0	0	0	0	0	0	0	0	0	0	0	0	0	0	0	0	0	0
25230	0	0	0	0	0	0	0	0	0	0	0	0	0	0	0	0	0	0	0	0	0	0	0	0	0	0	0	0	0	0	0	0	0	0	0	0	0	0	0	0	0	0	0	0	0	0	0	0	0
25258	0	0	0	0	0	0	0	0	0	0	0	0	0	0	0	17	6	5	2	13	21	7	0	0	0	0	0	0	0	0	0	0	0	0	0	0	0	0	0	0	0	0	0	0	0	0	0	0	0
25261	0	1	0	0	0	0	0	0	0	1	2	57	0	3	0	0	0	0	0	0	0	0	36	0	0	0	0	0	0	0	0	0	0	0	0	0	0	0	0	0	0	0	0	0	0	0	0	0	0
25262	3	4	3	2	5	68	50	0	41	0	0	2	98	101	2	500	33	0	3	0	2854	170	800	402	216	41	1	59	9	11	16	0	0	2	6	2	3	27	22	0	0	1	4	0	3	12	4	3	11
25297	0	0	0	0	0	0	0	0	0	0	0	0	0	0	0	0	0	0	0	0	5	0	8	0	5	1	0	3	2	0	0	0	0	0	0	0	0	0	0	0	0	0	0	0	0	1	5	7	0
25303	0	0	0	0	0	0	0	0	0	0	0	0	0	0	0	0	0	0	0	0	0	0	0	0	0	0	0	0	0	0	0	0	0	0	0	0	0	0	0	0	0	0	0	0	0	0	0	0	0
25306	0	0	0	0	0	0	0	0	0	0	0	0	0	0	0	0	2	0	0	0	6	0	0	0	0	0	0	0	2	0	0	0	0	0	0	0	0	0	0	0	0	0	0	0	0	0	0	0	0
25308	0	0	0	1	14	13	18	3	87	2	0	2	33	3	1	5	1	0	259	0	14	32	8	41	19	0	1	28	17	2	4	2	1	0	0	3	2	3	2	0	0	4	9	3	31	6	15	16	3
25415	0	0	0	0	0	0	0	0	0	0	0	0	0	0	0	0	0	0	0	0	0	0	0	0	0	0	0	0	0	0	0	0	0	0	0	0	0	0	0	97	3	0	0	0	0	0	0	0	0
25491	0	0	0	0	0	0	0	0	0	0	0	0	0	0	8	7	53	2	2	0	16	404	5	1	0	0	0	0	0	0	0	0	0	0	0	1	3	2	0	0	0	2	3	1	2	5	4	4	6
25493	12	15	0	2	0	0	0	3	0	0	0	35	1	77	10	3	1	23	40	0	0	0	332	8	0	0	0	0	0	0	1	0	12	6	1	0	1	0	0	0	0	1	1	1	0	1	0	0	0
25510	0	0	0	0	0	0	0	0	0	0	0	0	0	0	0	0	0	0	0	0	0	0	0	0	0	0	0	0	0	0	0	0	0	0	0	0	0	0	0	0	0	0	0	0	0	0	0	0	0
25511	5	0	0	0	0	0	0	0	0	8	0	19	0	78	0	0	0	0	0	0	0	0	1	0	0	0	0	0	0	0	0	0	0	0	0	0	0	0	0	0	0	0	0	0	0	0	0	1	5
25515	0	0	0	0	0	0	0	0	0	0	0	0	0	0	0	0	0	0	0	0	0	60	0	0	2	3	0	5	4	0	0	0	0	0	0	0	0	0	0	0	0	0	0	0	0	0	0	0	0
25574	0	0	0	0	0	0	0	0	0	0	0	0	0	0	0	9	22	0	4	0	3	68	1	18	0	0	0	0	0	0	0	0	0	0	0	0	0	0	0	0	0	0	0	0	0	0	0	0	0
25611	0	2	0	9	0	0	0	16	0	0	0	0	0	0	0	0	0	0	0	0	0	0	0	0	0	0	0	0	0	0	0	0	0	0	0	0	0	0	0	0	0	9	3	5	0	0	0	0	0
25658	0	0	0	0	0	3	0	0	0	0	0	0	1	0	0	2	1	1	2	5	0	0	0	0	8	1	15	8	0	0	0	0	0	0	0	0	0	0	0	0	0	0	0	0	1	0	0	1	0
25660	0	0	0	0	0	0	0	0	0	0	0	0	0	0	0	6	0	0	208	0	0	0	2	3	0	0	0	0	0	0	0	0	0	0	0	0	0	0	0	0	0	0	0	0	0	0	0	0	0
25696	0	0	0	0	0	0	0	0	0	0	0	0	0	0	0	0	0	0	0	0	0	0	0	0	0	0	0	0	0	0	0	0	0	0	0	0	0	0	0	0	0	0	0	0	1	2	2	1	0
25702	0	0	0	0	0	83	58	0	0	0	0	0	0	0	0	0	0	0	0	0	0	0	0	0	0	0	0	0	0	0	0	0	0	0	0	0	0	0	0	0	0	0	0	0	0	0	0	0	0
25706	0	0	0	0	0	0	0	0	0	1	6	1	0	1	1	0	0	0	0	0	0	0	6	0	0	0	0	0	0	0	0	0	0	0	0	0	0	0	0	0	0	15	8	12	0	1	0	0	1
25762	0	0	0	0	0	0	0	0	0	0	0	0	0	0	0	2	22	12	7	0	12	40	18	17	47	34	4	31	48	0	0	0	0	0	0	0	0	0	0	0	0	0	0	0	0	0	0	0	0
25768	0	0	0	0	0	0	0	0	0	0	0	0	0	0	0	0	2	5	23	0	1	0	2	23	0	0	0	0	0	0	0	0	0	0	0	0	0	0	0	0	0	0	0	0	0	0	0	0	0
25772	0	0	0	0	0	0	0	0	0	0	0	0	0	0	0	0	0	4	438	23	3	0	0	0	0	0	0	0	13	0	0	0	0	0	0	0	0	0	0	0	0	0	0	0	0	0	0	0	0
25779	399	346	365	266	0	0	0	103	124	79	30	171	0	1277	251	38	20	5054	10480	30	0	0	2256	216	1	0	0	0	0	444	393	3	328	219	398	585	183	1053	275	1	0	13	27	18	203	146	171	89	438
25788	0	0	0	0	0	0	0	0	0	0	0	0	0	0	0	0	0	0	0	0	0	0	0	0	463	243	16	383	378	0	0	0	0	0	0	0	0	0	2	0	0	0	0	0	0	0	0	0	0
25794	1	2	0	2	6	3	4	0	2	0	0	0	2	0	0	0	5	0	0	0	0	3	0	0	1	0	0	5	4	0	0	0	0	0	0	0	0	1	0	0	0	0	2	0	2	0	0	1	0
25804	0	0	0	0	0	0	0	0	0	119	11	1	0	0	0	0	0	0	0	0	0	0	50	0	0	0	0	0	0	0	0	20	1	7	0	0	0	0	0	0	0	0	0	0	0	0	0	0	0
25809	0	0	0	0	0	0	0	0	0	0	0	0	0	0	0	0	1	0	0	0	0	0	0	0	0	0	0	0	0	0	0	0	0	0	0	0	0	0	0	0	0	0	0	0	0	0	0	0	0
25816	0	0	0	0	1	0	0	0	0	0	0	0	0	0	0	3	0	16	78	17	7	2	15	20	0	0	0	0	0	0	0	0	0	0	0	0	0	0	0	0	0	0	0	0	0	0	0	0	0
25846	0	0	0	0	0	0	0	0	0	0	0	0	0	0	0	0	0	0	3	0	0	0	0	0	0	0	0	0	0	0	0	0	0	0	0	0	0	0	0	0	0	0	0	0	0	0	0	0	0
25893	0	0	0	0	0	0	0	0	0	0	0	0	0	0	0	0	0	0	0	0	0	0	0	0	0	0	0	0	0	0	0	0	0	0	0	0	0	0	0	0	0	0	0	0	0	0	0	0	0
25903	0	0	0	1	0	0	0	0	0	54	5	164	0	3	2	0	0	0	0	0	0	0	0	0	0	0	0	0	0	0	0	0	14	1	1	4	4	0	9	0	0	0	0	0	34	47	17	68	92
25904	0	0	0	2	5	0	2	0	0	0	0	0	5	0	0	0	0	0	0	0	0	40	0	0	8	14	0	5	1	0	0	0	0	0	0	0	0	0	0	0	0	0	0	0	0	0	0	0	0
25910	0	1	0	0	0	0	0	0	0	2	1	0	0	47	8	0	0	0	119	0	0	0	27	0	0	0	0	0	0	0	0	2	0	0	1	0	0	0	0	0	0	4	7	18	0	0	0	0	1
25916	0	0	1	0	0	0	0	0	0	0	0	1	0	0	0	0	0	1	0	0	0	0	0	0	0	0	0	0	0	0	0	1	0	4	2	0	2	0	0	199	173	7	2	10	0	0	0	0	0
25921	0	0	0	0	0	0	0	0	0	0	0	0	0	0	0	27	5	0	0	0	0	0	36	7	0	0	0	0	0	0	0	0	0	0	0	0	0	0	0	0	0	0	0	0	0	0	0	0	0
25934	0	0	0	0	0	0	0	0	0	0	0	0	0	0	0	2	0	7	6	0	0	0	3	25	1	29	0	0	1	0	0	0	0	0	0	0	0	0	0	0	0	0	0	0	0	0	0	0	0
25967	0	0	0	5	33	6	42	2	5	0	0	0	0	0	0	0	0	0	0	0	0	0	0	0	0	0	0	0	0	0	0	0	0	0	4	3	5	0	0	0	0	20	40	33	1	7	4	3	5
26056	0	0	8	0	0	0	0	0	0	0	0	0	0	0	0	0	0	0	3	0	0	0	0	0	0	0	0	0	0	0	0	0	8	0	0	0	0	0	0	0	0	215	522	63	0	0	0	0	0
26061	0	0	0	0	0	0	0	0	0	0	0	0	0	0	0	6	1	0	0	2	0	3	0	2	0	0	0	0	0	0	0	0	0	0	0	0	0	0	0	0	0	0	0	0	1	0	0	0	0
26104	0	0	0	0	0	0	0	0	0	0	0	0	0	0	0	28	21	0	3	0	2	21	1	1	0	0	0	0	0	0	0	0	0	0	0	0	0	0	0	0	0	0	0	0	0	0	0	0	0
26151	0	0	0	0	0	0	0	0	0	0	0	0	0	0	0	28	16	0	0	0	0	0	0	0	0	0	0	0	0	0	0	0	0	0	0	0	0	0	0	0	0	0	0	0	0	0	0	0	0
26182	0	0	0	0	0	0	0	0	0	0	0	0	0	0	0	0	0	0	0	0	0	0	0	0	0	0	0	0	0	0	0	0	0	0	0	0	0	0	0	0	0	0	0	0	0	0	0	0	0
26194	0	0	0	0	0	0	0	0	0	0	0	0	0	0	0	0	0	0	5	0	1	32	13	2	0	0	0	0	0	0	0	0	0	0	0	0	0	0	0	0	0	0	0	0	0	0	0	0	0
26222	0	0	0	0	0	0	0	0	0	0	0	0	0	0	0	0	0	0	0	0	0	0	0	0	0	0	0	0	0	0	0	0	0	0	0	0	0	0	0	0	0	0	0	0	0	0	0	0	0
26223	0	0	0	0	0	0	0	0	0	0	0	0	0	0	0	0	0	0	0	0	0	0	0	0	0	0	0	0	0	0	0	0	0	0	0	0	0	0	0	33	20	0	0	0	0	0	0	0	0
26245	0	0	0	0	0	0	0	0	0	0	0	0	83	0	1	1	0	5	2	4	58	647	30	14	8	13	1	5	1	0	0	0	1	0	0	0	0	0	0	0	0	0	0	0	2	1	6	24	0
26247	0	0	0	0	0	0	0	0	0	0	0	0	0	0	0	0	0	0	4	1	0	0	1	1	0	7	0	2	3	0	0	0	0	0	0	1	0	0	0	0	0	0	0	0	0	0	0	0	0
26251	0	0	0	0	0	0	0	0	0	0	0	0	0	0	0	0	0	0	0	0	0	0	0	0	0	0	0	0	0	0	0	0	0	0	0	0	0	0	0	0	0	0	0	0	0	0	0	0	0
26256	0	0	0	0	0	0	0	2	1	0	0	0	0	0	0	0	0	4	2	0	0	18	0	26	4	0	0	1	0	0	0	0	0	0	0	0	0	0	0	0	0	0	0	0	0	0	0	0	0
26259	0	0	0	0	0	0	0	0	0	0	0	0	0	0	0	0	0	0	0	0	0	0	0	0	7	0	0	0	0	0	0	0	0	0	0	0	0	0	0	0	0	0	0	0	0	0	0	0	0
26276	0	0	0	0	0	0	0	0	0	0	0	0	0	0	0	2	0	2	5	0	0	16	1	2	0	0	0	0	0	0	0	0	0	0	0	0	0	3	0	0	0	1	2	0	0	1	0	0	0
26284	2	3	1	13	2	29	13	0	35	0	0	0	2	0	0	0	0	0	0	0	0	0	0	7	0	0	0	0	0	1	0	0	0	0	4	0	0	1	0	0	0	5	8	9	0	3	0	0	1
26296	0	0	0	0	0	0	0	0	0	0	0	0	0	0	0	0	0	0	0	0	0	0	0	0	0	0	0	0	0	0	0	0	0	0	0	0	0	0	0	0	0	0	0	0	0	0	0	0	0
26307	0	0	0	0	0	1	0	0	0	0	0	0	0	0	0	0	0	0	0	0	0	7	3	0	0	0	1	3	0	0	0	0	0	0	0	0	0	1	0	0	0	1	0	0	7	4	12	11	0
26340	0	0	0	0	0	0	0	0	0	0	0	0	0	0	0	0	0	0	0	0	0	0	0	0	0	0	0	0	0	0	0	0	0	0	0	0	0	0	0	0	0	0	0	0	0	0	0	0	0
26388	0	0	0	0	0	0	1	0	0	0	0	0	0	0	0	0	0	0	0	0	0	1	0	1	0	0	0	0	0	0	0	0	0	0	0	0	0	0	0	0	0	0	0	0	0	0	0	0	0
26404	0	0	0	0	0	0	0	0	0	0	0	0	1	0	0	0	2	0	0	0	0	30	11	7	0	0	0	5	2	0	0	0	0	0	0	0	0	0	0	0	0	0	0	0	0	0	0	0	0
26427	0	0	0	0	0	0	0	0	0	0	0	0	0	0	0	0	0	0	0	0	0	0	0	0	0	0	0	0	0	0	0	0	0	0	0	0	0	0	0	0	0	13	7	52	0	0	0	0	0
26509	0	0	0	0	0	0	1	0	0	0	0	0	1	0	0	0	2	1	41	1	0	5	4	1	0	0	0	1	1	0	0	0	0	0	0	0	0	0	0	0	0	0	0	0	0	0	0	3	0
26535	6	11	1	6	46	5	8	21	4	3	3	4	3	0	1	0	0	0	0	0	0	0	0	0	0	0	0	0	0	0	0	0	0	0	0	0	0	0	0	0	0	0	0	0	0	0	0	0	0
26538	0	0	0	0	0	0	0	0	0	60	17	1	0	0	0	0	0	0	0	0	0	0	1	0	0	0	0	0	0	0	0	60	16	9	0	0	0	0	0	0	0	0	0	0	0	0	0	0	0
26544	0	0	0	0	0	0	0	0	0	0	0	0	0	0	0	5	2	0	0	0	0	0	0	0	1	5	0	1	12	0	0	0	0	0	0	0	0	0	0	0	0	0	0	0	0	0	0	0	0
26595	0	0	0	1	0	4	12	0	0	1	0	0	0	0	3	0	15	0	7	0	0	347	0	4	0	0	0	4	1	0	0	0	0	0	0	0	0	0	0	0	0	2	0	0	1	0	0	0	1
26622	0	0	0	0	0	0	0	0	0	2	1	17	0	0	0	0	0	0	0	0	0	0	5	0	0	0	0	0	0	2	0	0	2	22	1	2	0	8	0	0	0	14	10	18	0	0	0	0	0
26630	0	0	0	0	0	0	0	0	0	0	0	0	0	0	0	0	0	0	0	0	0	0	0	0	0	0	0	0	0	0	0	0	0	0	0	0	0	0	0	0	0	0	0	0	0	0	0	0	0
26675	0	0	0	0	0	0	0	0	0	0	0	0	0	0	0	0	0	0	0	0	0	0	0	8	0	0	1	3	2	0	0	0	0	0	0	0	0	0	0	0	0	0	0	0	0	0	0	0	0
26687	1	1	0	1	3	145	152	22	9	0	0	1	1	0	0	0	0	0	0	0	0	0	0	0	0	0	0	0	0	0	0	0	0	0	0	0	0	0	0	0	0	0	0	0	0	0	0	0	0
26691	0	0	0	0	0	0	0	0	0	3	0	6	0	2	0	0	0	1	5	0	0	0	11	1	0	0	0	0	0	0	0	0	2	17	1	1	1	0	0	0	0	0	1	0	0	0	0	0	0
26714	0	0	0	0	1	46	39	0	6	0	0	1	0	0	0	0	0	0	0	0	0	0	0	0	0	0	0	0	0	0	0	0	0	0	0	0	0	0	0	0	0	0	0	0	0	9	0	0	1
26739	0	0	0	0	0	0	0	0	0	0	0	0	0	0	0	0	0	0	0	0	0	0	0	0	0	0	0	0	0	0	0	0	0	0	0	0	0	0	0	0	0	0	0	0	0	0	0	0	0
26744	0	0	0	0	0	0	0	0	0	0	0	0	0	0	0	0	0	0	0	0	0	0	0	0	0	0	0	0	0	0	0	0	0	0	0	0	0	0	0	0	0	0	0	0	0	0	0	0	0
26777	0	0	0	0	0	0	0	0	0	0	0	0	0	0	0	2	5	12	20	3	16	809	29	12	0	0	0	0	0	0	0	0	0	0	0	0	0	0	0	0	0	0	0	0	0	0	0	0	0
26779	0	2	3	9	97	284	261	23	76	0	0	0	95	0	5	0	0	0	0	0	0	0	0	0	0	0	0	4	1	0	0	0	0	0	0	0	0	17	0	0	0	1	0	0	0	1	1	0	0
26783	1	1	1	1	0	0	0	0	0	48	78	6	0	0	3	0	0	0	0	0	0	0	4	0	0	0	0	0	0	0	0	11	9	5	4	0	0	0	0	0	0	0	0	0	4	2	4	1	12
26813	0	0	0	0	0	0	0	0	0	0	0	0	0	0	0	0	11	0	0	0	0	0	0	0	0	0	0	0	0	0	0	0	0	0	0	0	0	0	0	0	0	0	0	0	0	0	0	0	0
26861	1	0	1	0	0	0	0	0	0	16	19	0	0	0	10	0	0	6	19	0	0	0	28	0	0	0	0	0	0	0	1	23	1	1	0	0	0	0	0	0	0	6	1	3	0	0	0	0	0
26862	0	0	0	0	0	0	0	0	0	0	0	0	0	0	0	0	53	0	0	0	0	0	0	2	0	0	0	0	0	0	0	0	0	0	0	0	0	0	0	0	0	0	0	0	0	0	0	0	0
26874	0	0	0	0	0	0	0	0	0	0	0	0	0	0	0	0	0	0	0	0	0	0	0	0	0	0	0	0	0	0	0	0	0	0	0	0	0	0	0	32	79	0	0	0	0	0	0	0	0
26880	0	0	3	35	0	18	18	45	9	0	0	0	202	9	7	146	168	30	98	4	376	3324	399	290	401	52	35	547	116	2	2	0	2	1	23	13	53	59	0	0	0	6	24	8	89	60	111	131	33
26904	0	0	0	0	0	0	0	0	0	0	0	0	0	0	0	0	0	1	1	2	0	0	0	0	0	0	0	2	0	0	0	0	0	0	0	0	0	0	0	0	0	0	0	0	0	0	0	0	0
26908	0	0	0	0	0	0	0	1	0	0	0	0	0	0	0	1	0	4	0	0	0	66	2	0	0	0	0	0	0	0	0	0	0	0	0	0	0	0	0	0	0	0	0	0	0	0	0	0	0
26918	1	0	4	0	5	14	12	1	6	0	0	1	143	7	0	0	0	0	0	0	0	0	0	0	0	0	0	0	0	0	0	0	0	0	0	0	0	0	0	0	0	0	0	0	0	0	0	0	0
26960	0	0	0	0	0	0	0	0	0	0	0	0	0	0	0	0	0	0	0	0	0	0	0	0	0	0	0	0	0	0	0	0	0	0	0	0	0	0	0	119	75	0	0	0	0	0	0	0	0
27088	0	0	0	0	0	0	0	0	0	0	0	0	0	0	0	0	0	0	0	0	0	0	0	0	0	0	0	0	1	0	0	0	0	0	0	0	0	0	0	0	0	0	0	0	0	0	0	0	0
27092	0	0	0	0	0	0	0	0	0	2	1	0	0	0	0	0	0	0	0	0	0	0	0	0	0	0	0	0	0	0	0	0	11	38	0	0	0	0	0	0	0	28	0	12	0	0	0	0	3
27119	0	0	0	0	0	0	0	0	0	0	0	1	0	20	0	0	0	0	0	0	0	0	43	0	0	0	0	0	0	0	0	0	0	0	0	0	0	0	0	0	0	0	0	0	0	0	0	0	0
27168	0	1	0	0	0	0	0	0	0	5	4	0	0	3	15	0	0	0	0	0	0	0	0	0	0	0	0	0	0	4	9	10	10	39	33	19	39	30	5	0	0	8	1	0	0	0	0	0	0
27177	0	0	0	0	0	0	0	0	0	0	0	0	0	0	0	0	0	0	91	5	0	0	0	0	0	0	0	0	0	0	0	0	0	0	0	0	0	0	0	0	0	0	0	0	0	0	0	0	0
27185	0	0	0	0	0	0	0	0	0	20	55	0	0	0	0	0	0	0	0	0	0	0	2	0	0	0	0	0	0	0	0	10	0	0	0	0	0	1	0	0	0	0	0	0	0	0	0	0	0
27195	0	0	0	0	0	0	0	0	0	0	0	0	0	0	0	0	0	0	19	0	0	0	0	0	0	0	0	0	0	0	0	0	0	0	0	0	0	0	0	0	0	0	0	0	0	0	0	0	0
27196	0	0	0	0	0	0	0	0	0	0	0	0	30	0	0	0	0	0	0	0	0	0	0	0	0	0	0	0	0	0	0	0	0	0	0	0	0	0	0	0	0	0	0	0	0	0	0	0	0
27197	0	0	0	0	0	0	0	0	0	0	0	0	0	0	0	8	0	1	11	2	0	0	0	0	1	2	1	5	3	0	0	0	0	0	0	0	0	0	0	0	0	0	0	0	0	0	0	0	0
27223	0	0	0	0	0	0	0	0	0	0	0	1	128	1	0	0	0	0	0	0	0	0	0	0	0	0	0	0	0	0	0	0	0	0	0	0	0	0	0	0	0	0	0	0	0	0	0	0	0
27264	0	31	0	2	20	1	2	0	2	0	5	0	12	0	0	0	0	0	0	0	0	0	0	0	0	0	0	0	0	0	0	0	1	0	0	0	0	0	0	0	0	0	0	0	0	0	0	0	0
27328	0	0	0	0	0	0	0	0	0	0	0	0	0	0	0	0	0	0	0	0	0	6	0	11	0	1	0	0	1	0	0	0	0	0	0	0	0	0	0	0	0	6	0	3	1	12	1	4	8
27373	0	0	0	0	0	0	0	0	0	0	0	0	0	0	0	0	0	0	0	0	0	0	0	0	0	0	0	0	0	0	0	0	0	0	0	0	0	0	0	36	17	0	0	0	0	0	0	0	0
27379	2	2	1	6	0	0	0	0	0	0	0	0	0	1	0	0	0	2	19	0	0	0	0	0	0	0	0	0	0	1	0	0	0	0	0	1	0	1	0	0	0	0	2	0	5	8	3	5	17
27386	0	0	0	0	0	0	0	0	0	0	1	1	0	21	0	0	0	61	26	0	0	0	382	0	0	0	0	0	0	0	0	0	0	0	0	0	0	0	0	0	0	0	0	0	0	0	0	0	0
27400	0	0	0	0	0	0	0	0	0	0	0	0	0	0	0	0	0	0	0	0	0	0	0	0	0	0	0	0	0	0	0	0	0	0	0	0	0	0	0	0	0	0	0	0	0	0	0	0	0
27465	0	0	0	1	0	0	0	0	0	20	1	0	0	0	0	0	0	0	0	0	0	0	1	0	0	0	0	0	0	0	0	1	6	7	0	0	0	0	0	0	0	92	162	160	2	5	6	1	4
27477	0	0	0	0	0	0	0	0	0	1	4	0	0	0	0	0	0	0	0	0	0	3	0	0	0	0	0	0	0	0	0	6	8	7	0	2	4	0	0	72	165	0	0	0	2	0	0	0	1
27524	0	0	0	0	0	0	0	0	0	0	0	0	0	0	0	0	1	0	2	0	12	0	0	0	0	0	0	0	0	0	0	0	0	0	0	0	0	0	0	0	0	1	0	1	3	48	4	6	27
27579	0	0	0	0	0	0	0	0	0	0	0	0	0	0	0	0	4	0	0	0	0	14	0	0	0	0	0	0	0	0	0	0	0	0	0	0	0	0	0	0	0	0	0	0	0	0	0	0	0
27598	0	0	0	0	0	0	0	0	0	0	0	0	0	0	0	0	0	0	0	0	0	0	0	0	5	2	33	16	2	0	0	0	0	0	0	0	0	0	0	0	0	0	0	0	0	0	0	0	0
27643	0	0	0	0	0	0	0	0	0	0	0	0	0	0	0	1	1	0	0	0	0	8	1	1	0	0	0	0	0	0	0	0	0	0	0	0	0	0	0	0	0	0	0	0	0	0	0	0	0
27683	1	0	0	0	0	0	0	0	0	0	0	0	0	100	25	0	0	0	0	0	0	0	0	12	0	0	0	0	0	0	0	0	0	0	1	0	1	3	3	0	0	0	0	0	0	0	0	2	0
27718	0	0	0	0	0	0	0	0	0	1	66	0	0	0	0	0	0	0	0	0	0	0	0	0	0	0	0	0	0	0	0	0	0	0	0	0	0	0	0	0	0	0	0	0	0	0	0	0	0
27813	0	0	0	0	0	0	0	0	0	0	0	0	0	0	0	0	7	0	4	0	1	4	3	2	0	1	1	0	1	0	0	0	0	0	0	0	0	0	0	0	0	0	0	0	0	0	0	0	0
27840	1	0	2	0	0	0	0	1	3	1	1	1	11	4	0	39	12	18	89	10	0	0	4	0	0	0	0	0	0	0	0	0	0	0	3	3	3	0	0	9	9	1	2	7	2	0	4	2	9
27847	0	0	0	0	1	6	5	2	6	0	0	0	0	0	0	0	0	0	0	0	0	0	0	0	0	0	0	0	0	0	0	0	0	0	0	0	0	0	0	0	0	0	0	0	0	0	0	0	0
27849	0	0	0	0	0	0	0	0	0	2	0	0	0	0	1	0	0	0	0	1	0	0	1	0	0	0	0	0	0	0	0	1	27	45	0	0	0	0	0	0	0	0	5	0	1	1	0	0	2
27850	0	0	0	1	0	0	0	0	0	2	1	4	0	0	17	0	0	0	0	0	0	0	0	0	0	0	0	0	0	0	0	0	0	0	0	0	0	0	0	0	0	0	0	0	0	1	2	0	16
27867	0	0	0	0	0	0	0	0	0	123	118	0	0	0	0	0	0	0	0	0	0	0	21	0	0	0	0	0	0	0	0	0	0	0	0	0	0	0	0	0	0	0	0	0	0	0	0	0	0
27883	0	0	0	0	0	0	0	0	0	0	0	0	0	0	0	0	0	2	2	0	2	220	6	0	0	0	0	0	0	0	0	0	0	0	0	0	0	0	0	0	0	0	0	0	0	0	0	0	0
27906	0	0	0	0	0	0	0	0	0	0	0	0	0	0	0	0	1	0	65	27	7	93	2	6	0	0	0	0	0	0	0	0	0	0	0	0	0	0	0	0	0	0	0	0	19	3	25	9	0
27986	0	0	0	0	0	0	0	0	0	0	0	0	0	0	0	0	0	0	0	0	0	0	0	0	0	0	0	0	0	0	0	0	0	0	0	0	0	0	0	0	0	0	0	0	0	0	0	0	0
27990	1	0	2	0	6	3	8	189	20	0	0	0	0	0	0	0	0	0	0	0	0	0	0	0	0	0	0	0	0	0	0	0	0	0	0	0	0	0	0	0	0	0	0	0	0	0	0	0	0
28018	0	0	0	1	1	0	8	0	0	0	0	0	1	0	0	1	0	0	0	0	0	0	0	16	2	8	0	0	2	0	0	0	0	0	0	0	0	1	0	0	0	0	0	0	1	0	0	0	0
28037	0	0	0	0	0	0	0	0	0	0	0	0	0	0	0	0	2	0	0	0	0	0	0	0	0	0	0	0	0	0	0	0	0	0	0	0	0	0	0	0	0	0	0	0	0	0	0	0	0
28064	0	0	0	0	0	0	0	0	0	0	0	0	0	0	0	2	0	17	7	2	8	183	18	0	0	0	0	0	0	0	0	0	0	0	0	0	0	0	0	0	0	0	0	0	0	0	0	0	0
28096	0	0	0	0	0	0	0	0	0	0	0	0	0	0	0	0	0	0	0	0	1	1	0	6	3	1	26	1	10	0	0	0	0	0	0	0	0	0	0	0	0	0	0	0	0	0	0	0	0
28121	0	0	0	0	0	0	0	0	0	0	0	0	0	0	0	0	0	0	0	0	0	0	0	0	16	12	2	14	41	0	0	0	0	0	0	0	0	0	0	0	0	0	0	0	0	0	0	0	0
28143	0	0	0	0	0	0	0	0	0	0	0	0	0	0	0	0	0	3	7	0	2	0	0	4	0	0	0	0	0	0	0	0	0	0	0	0	0	0	0	0	0	0	0	0	0	0	0	0	0
28217	0	0	0	0	0	0	0	0	0	0	0	0	0	0	0	0	10	0	0	0	1	1	0	0	0	0	0	0	1	0	0	0	0	0	0	0	0	0	0	0	0	0	0	0	0	1	0	2	0
28225	0	1	4	145	360	383	339	529	255	1	0	9	0	0	1	0	0	0	0	0	0	0	0	0	0	0	0	0	0	10	14	0	1	0	34	17	53	227	6	0	0	65	68	86	5	12	7	7	7
28236	0	0	0	0	0	0	0	0	0	0	0	0	0	0	0	10	46	0	3	0	0	71	13	7	0	0	0	0	0	0	0	0	0	0	0	0	0	0	0	0	0	1	1	1	1	0	1	4	0
28247	0	0	0	0	0	0	0	0	0	0	0	0	0	0	0	0	0	0	0	0	0	0	0	0	0	0	0	0	0	0	0	0	0	0	0	0	0	0	0	0	0	0	0	0	0	0	0	0	0
28275	0	0	0	0	0	0	0	0	0	0	0	0	0	0	0	0	0	0	0	0	0	0	0	0	0	0	0	0	0	0	0	0	0	0	0	0	0	0	0	0	0	0	0	0	0	0	0	0	0
28367	0	0	0	0	2	5	2	0	0	0	0	0	41	0	0	0	0	0	0	0	0	0	0	0	0	0	0	0	0	0	0	0	0	0	0	0	0	0	0	0	0	0	0	0	0	0	0	0	0
28380	0	0	0	0	0	0	0	0	0	0	0	0	0	1	0	0	0	2	6	0	1	3	1	2	13	13	7	2	1	0	0	0	0	0	0	0	0	0	0	0	0	0	0	0	0	0	0	0	0
28403	0	0	0	0	0	0	0	0	0	0	0	0	0	0	0	0	2	0	0	0	0	37	0	0	0	0	0	0	0	0	0	0	0	0	0	0	0	0	0	0	0	0	0	0	0	0	0	0	0
28430	0	0	0	0	3	18	30	2	0	0	0	0	0	0	0	0	0	0	0	0	0	0	0	0	0	0	0	0	0	0	0	0	0	0	0	0	0	0	0	0	0	0	0	0	0	0	0	0	0
28473	151	7	21	0	0	0	0	0	0	57	38	353	0	2	105	0	0	0	0	0	0	0	21	0	0	0	0	0	0	1127	1262	103	601	839	307	355	191	330	286	0	0	29	7	6	2	0	1	0	3
28589	0	0	0	2	0	0	0	0	0	0	0	0	0	0	0	0	0	51	6	0	0	0	0	0	0	0	0	0	0	0	0	0	0	0	0	0	0	0	0	0	0	0	0	0	0	0	0	0	0
28600	0	0	0	0	0	0	0	0	0	0	0	0	0	0	0	0	0	0	0	0	0	0	0	0	0	0	0	0	0	0	0	0	0	0	0	0	0	0	0	0	0	0	0	0	0	0	0	0	0
28633	1	0	3	0	0	0	0	0	0	11	41	5	0	1	6	0	0	1	1	0	0	0	34	0	0	0	0	0	0	0	0	20	4	4	0	0	0	0	0	0	0	0	0	0	0	0	0	0	0
28643	0	0	0	0	0	0	0	0	0	10	1	0	0	0	0	0	0	0	0	0	0	0	1	0	0	0	0	0	0	0	0	46	2	0	0	0	0	0	0	0	0	2	2	4	0	0	0	0	0
28680	0	0	0	0	0	0	0	0	0	0	0	3	0	0	0	0	0	0	0	0	0	0	0	0	0	0	0	0	0	0	0	0	0	0	0	0	0	0	0	0	0	149	45	204	0	3	0	0	0
28700	0	0	0	1	0	0	0	0	0	0	0	0	0	0	0	0	0	0	26	3	0	0	0	1	1	0	1	4	0	0	0	0	0	0	0	0	0	1	0	0	0	0	0	0	0	0	0	0	0
28702	0	0	0	0	0	0	0	0	0	0	0	0	0	0	0	60	0	0	3	0	0	0	0	0	0	0	0	0	0	0	0	0	0	0	0	0	0	0	0	0	0	0	0	0	0	0	0	0	0
28712	0	0	0	0	0	0	0	0	0	0	0	0	0	0	0	0	0	2	5	1	0	0	0	0	0	0	0	0	0	0	0	0	0	0	0	0	0	0	0	0	0	0	0	0	0	0	0	0	0
28744	0	0	0	0	0	0	0	0	0	0	0	0	0	0	0	0	39	0	0	0	0	0	0	0	0	0	0	0	0	0	0	0	0	0	0	0	0	0	0	0	0	0	0	0	0	0	0	0	0
28756	0	0	2	4	2	1	3	5	8	0	0	0	7	1	0	3	1	1	1	0	1	22	5	2	0	0	0	0	1	0	0	0	0	0	0	0	0	0	0	0	0	0	0	0	0	0	0	0	0
28759	0	0	0	0	0	0	0	0	0	0	0	0	0	0	0	0	0	0	0	0	0	0	0	0	47	18	3	3	52	0	0	0	0	0	0	0	0	0	0	0	0	0	0	0	0	0	0	0	0
28766	0	0	0	2	56	0	6	3	2	0	0	0	0	0	0	0	0	0	0	0	0	0	0	0	0	0	0	0	0	0	0	0	0	0	0	0	0	0	0	0	0	0	0	0	0	0	0	0	0
28790	1	0	0	0	0	0	0	0	0	1	2	4	0	28	0	0	0	0	0	0	0	0	70	0	0	0	0	0	0	0	0	0	0	0	0	0	0	0	0	0	0	0	0	0	0	0	1	0	0
28806	0	1	0	0	1	7	11	0	0	0	0	0	10	0	1	1	0	0	0	0	0	109	7	5	1	0	2	25	3	0	0	0	0	0	0	0	0	0	0	0	0	0	0	0	0	0	0	0	0
28829	8	43	9	8	0	0	0	0	0	15	16	201	0	26	33	0	0	1	21	0	0	0	176	8	0	0	0	0	0	20	32	4	44	25	43	94	47	23	141	0	0	0	0	0	0	1	1	1	6
28895	0	0	0	0	31	1	0	0	2	0	0	0	0	0	0	7	73	0	183	0	0	60	0	0	6	0	0	17	7	0	0	0	0	0	0	0	0	0	0	0	0	0	0	0	5	0	4	4	0
28913	0	0	0	0	0	0	0	0	0	0	0	0	0	0	0	0	0	0	0	0	0	0	0	0	0	0	0	0	0	0	0	0	0	0	0	0	0	0	0	0	0	0	0	0	0	0	0	0	0
28919	12	5	6	0	0	0	0	0	0	0	0	0	0	2	0	0	0	19	72	0	0	0	1	0	0	0	0	0	0	2	4	0	1	0	5	5	3	0	1	0	0	0	0	0	0	0	0	0	0
28973	0	7	0	7	0	0	0	7	3	0	0	2	0	0	0	0	0	0	2	0	0	0	0	0	0	0	0	0	0	0	0	0	1	0	1	3	2	0	0	0	0	0	1	0	7	0	3	1	2
28986	0	0	0	0	0	0	0	0	0	9	13	4	0	0	3	0	0	0	0	0	0	0	0	0	0	0	0	0	0	0	0	11	2	6	4	0	1	0	0	146	203	8	8	26	0	0	0	0	0
29000	0	0	0	0	0	0	0	0	0	0	0	0	0	0	0	0	0	0	82	0	0	0	26	0	0	0	0	0	0	0	0	0	0	0	0	0	0	0	0	0	0	0	0	0	1	0	0	0	0
29018	0	0	0	0	2	0	0	0	2	0	0	0	1	0	0	2	13	0	0	1	57	14	0	8	19	17	0	10	0	0	0	0	0	0	0	0	0	0	0	0	0	0	0	0	0	0	0	0	0
29057	0	0	0	0	0	0	0	3	1	0	0	0	0	0	0	1	4	9	5	0	0	0	4	9	0	0	0	0	0	0	0	0	0	3	0	0	0	2	16	0	0	1	0	5	3	3	2	1	0
29105	0	0	0	0	0	0	0	0	0	0	0	0	0	0	0	0	2	8	2	4	1	52	7	2	1	1	0	0	0	0	0	0	0	0	0	0	0	2	0	0	0	0	0	1	0	0	0	0	0
29109	0	0	0	0	0	0	0	0	0	17	0	0	0	0	0	0	0	0	0	0	0	0	0	0	0	0	0	0	0	2	1	25	6	8	0	0	0	0	1	0	0	0	0	0	0	0	0	0	0
29180	1	0	0	0	0	0	0	0	2	0	0	0	0	14	14	0	0	2	1	0	0	0	15	80	0	0	0	0	0	0	1	1	0	0	5	2	5	43	21	0	0	0	1	0	0	0	0	1	0
29238	4	0	8	0	0	0	0	0	0	0	0	1	0	2	0	0	0	1	13	0	0	1	1	1	0	0	0	0	0	1	0	0	1	0	0	1	0	34	7	0	0	0	0	0	0	0	0	0	0
29335	0	0	0	0	15	6	53	1	26	0	0	0	22	1	0	41	17	27	39	153	396	650	1161	1144	558	63	31	593	1012	1	0	0	0	0	16	23	56	4	3	0	0	0	2	0	204	59	260	350	25
29344	1	1	2	1	0	0	0	2	9	1	0	0	0	0	0	0	0	25	12	0	0	0	7	30	0	2	0	0	0	0	0	0	0	0	0	0	0	0	33	0	0	11	4	13	1	3	0	0	1
29388	0	0	0	0	0	0	0	1	0	0	0	0	0	0	0	0	0	33	43	0	0	0	0	1	0	0	0	0	0	0	0	0	0	0	0	0	0	0	0	0	0	0	0	0	0	0	0	0	0
29412	0	0	0	0	0	0	0	0	0	0	0	0	0	0	0	0	13	1	0	0	0	0	0	0	0	0	0	0	0	0	0	0	0	0	0	0	0	0	0	0	0	0	0	0	0	0	0	0	0
29462	0	0	0	0	0	0	0	0	0	0	0	0	0	0	0	0	0	0	0	0	142	972	0	0	245	118	79	129	189	0	0	0	0	0	0	0	0	0	0	0	0	0	0	0	0	0	0	0	0
29484	0	1	0	9	19	48	176	141	24	0	0	1	65	0	1	0	0	0	0	0	0	0	0	0	0	0	0	0	0	0	0	0	0	0	0	0	0	0	0	0	0	0	0	0	0	0	0	0	0
29502	0	0	0	0	0	0	0	0	0	0	0	0	0	0	0	0	0	0	0	0	1	87	0	0	0	0	0	0	0	0	0	0	0	0	0	0	0	0	0	0	0	0	0	0	0	0	0	0	0
29504	0	0	0	1	0	0	0	0	0	0	0	0	0	0	0	0	4	2	4	0	1	14	1	0	21	2	0	2	1	0	0	0	0	1	2	1	0	0	0	0	0	0	1	0	7	11	20	22	2
29532	0	0	0	0	0	0	0	0	0	0	0	0	0	0	0	14	9	18	49	1	0	0	0	0	0	0	0	0	0	0	0	0	0	0	0	0	0	0	0	0	0	0	0	0	0	0	0	0	0
29574	0	0	0	0	3	5	3	0	4	0	0	0	24	11	0	1	5	21	43	1	6	335	13	91	383	317	73	56	12	0	0	0	0	0	0	0	1	5	0	0	0	0	0	0	0	1	0	0	0
29674	0	0	0	0	0	0	0	0	0	0	0	0	0	0	0	0	0	0	2	4	0	0	1	48	0	0	0	0	0	0	0	0	0	0	0	0	0	0	0	0	0	0	0	0	0	0	0	0	0
29675	0	0	0	0	0	0	0	0	0	0	0	0	0	0	0	0	0	0	0	0	0	1	0	0	0	0	0	0	0	0	0	0	0	0	0	0	0	0	0	0	0	0	0	0	0	0	0	0	0
29683	4	1	1	2	0	0	0	0	0	3	1	25	0	4	29	0	0	0	1	0	0	0	8	0	0	0	0	0	0	0	0	0	0	0	0	0	0	0	0	0	0	1	0	0	0	0	0	0	0
29701	0	0	0	0	1	0	0	0	0	0	0	0	0	0	0	2	0	2	0	0	0	0	0	3	184	0	0	0	3	0	0	0	0	0	0	0	0	0	0	0	0	0	0	0	0	0	0	0	0
29749	0	0	0	0	0	0	0	0	5	0	0	0	0	0	0	7	2	19	224	51	0	0	4	38	0	29	0	0	1	0	0	0	0	0	0	0	0	0	0	0	0	0	0	0	0	0	0	0	0
29820	0	0	0	0	0	0	0	0	0	0	0	0	0	0	0	0	0	0	0	0	0	0	0	0	0	0	0	0	0	0	0	0	0	0	0	0	0	0	0	719	531	0	0	0	0	0	0	0	0
29889	0	0	0	0	0	0	0	0	0	0	0	0	0	0	0	0	0	0	0	1	0	0	0	6	0	0	0	0	0	0	0	0	0	0	0	0	0	0	0	0	0	0	0	0	0	0	0	0	0
29904	0	0	0	0	2	0	1	0	2	0	0	0	1	0	0	0	0	0	0	1	1	2	0	0	0	0	0	0	0	0	0	0	0	0	0	0	0	0	0	0	0	0	1	1	2	2	1	4	1
29923	0	1	0	3	8	21	18	0	8	0	0	0	3	0	1	0	0	0	0	0	0	0	0	0	0	0	0	0	0	0	0	0	0	0	0	0	0	1	0	0	0	0	0	0	0	0	0	0	0
29936	0	0	0	0	0	0	0	0	0	0	0	0	0	0	0	15	0	4	4	0	0	159	0	2	0	0	0	1	0	0	0	0	0	0	0	0	0	0	0	0	0	0	0	0	0	2	0	0	0
29966	0	0	0	0	0	0	0	0	0	83	147	1	0	2	8	0	0	23	23	1	0	0	226	0	0	0	0	0	0	0	0	37	4	0	0	0	0	0	0	0	0	0	0	0	0	0	0	0	2
29995	0	0	0	0	0	0	0	0	0	0	0	0	0	0	0	0	0	0	0	0	0	0	0	0	0	0	0	0	0	0	0	0	0	0	0	0	0	0	0	0	0	0	0	0	0	0	0	0	0
30018	0	0	0	0	0	0	0	0	0	0	0	0	0	0	0	0	3	0	0	0	2	0	0	0	0	1	0	124	118	0	0	0	0	0	0	0	0	0	0	0	0	0	0	0	29	4	38	31	0
30061	0	0	0	0	0	0	0	0	0	0	0	0	0	0	0	0	12	0	0	0	0	0	0	0	0	0	0	0	0	0	0	0	0	0	0	0	0	0	0	0	0	0	0	0	0	0	0	0	0
30065	0	0	0	0	0	0	0	0	0	0	0	0	0	0	0	0	0	5	21	2	0	0	0	0	0	49	4	0	3	1	0	1	0	1	0	0	0	0	0	0	0	0	0	0	0	0	0	0	0
30078	0	0	0	0	5	0	1	0	0	0	0	0	25	0	0	0	0	0	0	0	0	0	0	0	0	0	0	0	56	0	0	0	0	0	0	0	0	0	0	0	0	0	0	0	0	0	1	0	0
30100	7	1	0	0	0	0	0	0	0	18	29	25	0	4	3	0	0	0	0	0	0	0	55	0	0	0	0	0	0	0	0	9	0	0	2	0	0	0	0	0	0	2	2	0	0	0	0	0	0
30121	0	0	16	0	0	0	0	0	0	0	2	2	0	0	0	0	0	8	23	0	0	0	19	0	0	0	0	0	0	0	0	0	0	0	1	3	2	0	0	0	0	0	0	0	0	0	0	0	0
30133	0	0	0	0	0	0	0	0	0	0	0	0	0	0	0	0	7	0	0	0	0	0	2	1	15	5	8	15	3	0	0	0	0	0	0	0	0	0	0	0	0	0	0	0	0	0	0	0	0
30138	0	0	0	0	0	0	0	0	0	0	0	0	0	0	0	0	0	0	0	0	0	0	0	0	112	111	54	54	53	0	0	0	0	0	0	0	0	0	0	0	0	0	0	0	0	0	0	0	0
30147	51	4	0	0	0	0	0	1	1	26	3	75	0	55	218	0	0	2	6	0	0	0	630	0	0	0	0	0	0	1	3	1	35	3	5	10	3	1	0	0	0	0	0	0	1	3	1	1	21
30173	0	0	0	0	0	0	1	0	0	0	0	0	0	0	0	1	19	0	0	0	1	13	3	4	0	0	1	15	0	0	0	0	0	0	0	0	0	0	0	0	0	0	0	0	7	0	1	0	4
30176	0	0	0	0	0	0	0	0	0	19	1	0	0	0	0	0	0	0	0	0	0	0	0	0	0	0	0	0	0	0	0	57	0	0	0	0	0	0	0	0	0	1	0	0	0	0	0	0	0
30224	0	0	0	0	0	0	0	0	0	0	0	0	0	0	0	0	11	0	12	0	30	332	11	4	1	10	0	2	3	0	0	0	0	0	0	0	0	0	0	0	0	0	1	0	2	0	5	3	0
30253	0	0	0	1	8	0	1	0	1	0	0	0	1	0	0	0	3	0	15	1	0	0	0	0	0	0	0	0	0	0	0	0	0	0	0	0	0	0	0	0	0	0	0	0	0	0	0	0	0
30265	4	0	0	0	0	0	0	0	0	3	1	11	0	4	0	0	0	0	0	0	0	0	6	0	0	0	0	0	0	0	0	0	29	96	0	0	1	2	0	0	0	17	5	10	0	0	2	1	9
30283	0	0	0	0	0	0	0	0	0	0	0	0	0	0	0	0	2	0	14	0	0	0	0	6	2	1	0	0	0	0	0	0	0	0	0	0	0	0	0	0	0	1	0	0	3	1	0	1	5
30293	0	0	0	0	12	3	0	0	0	0	0	0	20	0	0	0	0	0	0	0	0	0	0	0	0	0	0	0	0	4	1	0	0	0	5	1	2	6	1	0	0	0	1	1	1	0	0	0	0
30334	11	19	0	14	0	0	0	0	0	25	11	374	0	128	62	0	0	0	4	0	0	0	473	0	0	0	0	0	0	9	14	28	10	46	96	59	54	80	1	0	0	0	8	1	10	9	11	4	28
30378	7	1	15	0	0	0	0	0	0	0	0	0	0	0	1	0	0	0	0	0	0	0	0	0	0	0	0	0	0	17	12	0	6	5	48	46	56	20	20	0	0	0	0	0	1	0	0	0	0
30409	0	0	0	0	0	0	0	0	0	0	0	0	0	0	0	0	0	0	0	0	0	0	2	0	0	0	0	0	0	0	0	0	0	0	0	0	0	0	0	0	0	0	0	0	0	2	1	0	2
30442	0	0	0	0	0	0	0	0	0	0	0	0	0	0	0	18	26	8	5	3	0	0	22	16	0	0	0	0	0	0	0	0	0	0	0	0	0	0	0	0	0	0	0	0	2	0	0	1	0
30448	0	0	0	0	0	0	0	0	0	0	0	0	0	0	0	8	0	1	0	0	0	1	1	0	0	0	0	0	0	0	0	0	0	0	0	0	0	0	0	0	0	0	0	0	0	0	0	0	0
30499	0	0	0	0	7	5	16	32	8	0	0	0	1	0	1	0	0	0	0	0	0	0	0	0	0	0	0	0	0	1	0	0	2	0	1	2	1	2	0	0	0	3	3	4	9	21	19	14	20
30504	0	0	0	1	0	0	0	0	0	0	0	0	0	0	0	0	0	17	0	0	0	0	0	0	0	0	0	0	0	0	0	0	0	0	0	0	0	0	0	0	0	15	65	15	0	0	0	0	0
30523	0	0	0	0	12	2	1	1	0	0	0	0	0	0	0	0	0	0	0	0	0	15	0	0	0	1	0	0	0	0	0	0	0	0	0	0	0	0	0	0	0	0	0	0	2	1	3	8	1
30534	0	0	0	0	0	0	0	0	0	0	0	0	0	0	0	0	0	0	0	0	0	0	0	0	0	0	0	0	0	0	0	0	0	0	0	0	0	0	0	0	0	0	0	0	1	0	0	0	0
30553	0	0	0	0	0	0	0	0	0	0	0	0	0	0	0	0	2	0	0	0	0	0	2	32	8	6	22	46	4	0	0	0	0	0	0	0	1	0	0	0	0	0	0	0	0	0	0	0	0
30599	0	0	0	0	0	0	0	0	0	29	2	0	0	0	0	0	0	0	3	0	0	0	61	0	0	0	0	0	0	0	0	167	0	0	0	0	0	0	0	0	0	0	0	0	0	0	0	0	0
30654	0	0	0	0	0	0	0	0	0	49	0	0	0	0	0	0	0	0	0	0	0	0	0	0	0	0	0	0	0	0	0	0	0	0	0	0	0	0	0	0	0	0	0	0	2	0	4	4	0
30787	0	0	0	0	0	0	0	0	0	0	0	0	0	0	0	0	0	1	25	0	0	0	0	1	0	0	0	0	0	0	0	0	0	0	0	0	0	0	0	0	0	0	0	0	0	0	0	0	0
30834	0	0	0	4	23	0	0	9	10	0	0	0	5	2	0	27	1	444	1913	455	47	66	20	205	9	28	0	8	12	0	0	0	0	0	0	0	0	0	0	1	0	0	0	0	0	0	0	0	0
30849	0	0	0	0	0	0	0	0	0	0	0	0	0	0	0	0	0	0	0	0	0	0	0	0	0	0	0	0	0	0	0	0	0	0	0	0	0	0	0	0	0	0	0	0	0	0	0	0	0
30861	0	0	0	0	0	0	0	0	0	0	0	0	0	0	0	0	0	0	0	0	0	0	0	0	0	0	0	0	0	0	0	0	0	0	0	0	0	0	0	0	0	0	0	0	0	0	0	0	0
30950	101	24	16	953	0	0	0	50	8	9	3	1	0	118	47	0	0	6	24	0	0	0	28	9	0	0	0	0	0	0	2	0	17	1	0	0	0	0	0	0	0	98	63	46	20	85	34	11	43
30996	0	0	0	0	0	0	0	1	0	0	0	0	0	0	0	0	12	20	0	0	1	5	0	0	0	0	0	0	1	0	0	0	0	0	0	0	0	0	0	0	0	0	0	0	1	0	0	0	0
31029	0	0	0	0	0	0	0	0	0	0	0	0	0	0	0	0	100	0	0	0	13	48	0	0	3	0	2	10	7	0	0	0	0	0	0	0	0	0	0	0	0	0	0	0	0	0	0	1	0
31035	133	142	169	0	0	0	0	1	1	0	0	9	1	0	3	0	0	0	2	0	0	1	0	0	0	0	0	0	0	163	142	0	7	0	227	214	147	739	334	0	0	1	3	0	0	0	0	0	0
31051	0	0	0	0	0	0	0	0	0	0	0	0	0	0	0	0	0	0	4	0	4	6	0	0	16	1	0	1	1	0	0	0	0	0	0	0	0	0	0	0	0	0	1	0	0	3	3	0	0
31089	2	1	3	13	199	184	82	6	69	0	0	7	71	0	0	0	0	0	0	0	0	0	0	0	0	0	0	0	0	0	0	0	0	0	0	0	0	0	0	0	0	0	0	0	0	0	0	0	0
31113	0	0	0	0	14	26	37	2	3	0	0	0	42	0	1	0	0	0	0	0	0	0	0	0	0	0	0	0	0	0	0	0	0	0	0	0	0	0	1	0	0	0	0	0	7	0	9	12	1
31167	0	0	0	0	0	0	0	0	0	0	0	0	0	0	0	0	0	118	195	15	37	19	57	51	0	0	0	0	0	0	0	0	0	0	0	0	0	0	0	0	0	0	0	0	0	0	0	0	0
31170	0	0	1	2	0	0	0	0	0	12	10	1	0	4	10	0	0	1	0	0	0	0	4	0	0	0	0	0	0	0	0	1	2	10	0	0	0	0	0	0	0	0	0	0	0	0	0	1	0
31226	0	0	0	0	0	0	0	0	0	0	0	0	0	0	0	0	4	0	0	0	0	0	0	0	0	0	0	0	0	0	1	0	0	0	0	0	0	25	0	0	0	0	0	0	0	0	0	0	0
31239	0	0	0	0	0	0	0	0	0	0	0	0	0	0	0	0	0	0	0	0	18	6	23	23	39	51	31	82	37	0	0	0	0	0	0	0	0	0	0	0	0	0	0	0	0	0	0	0	0
31243	0	1	0	26	20	56	76	39	21	0	0	0	19	0	1	0	0	0	0	0	0	0	0	0	0	0	0	0	0	0	0	0	0	0	0	0	0	0	0	0	0	0	0	0	0	0	0	0	0
31329	0	0	0	0	0	0	0	0	0	0	0	0	0	0	0	0	1	0	0	0	0	0	0	0	0	0	0	0	0	0	0	0	0	0	0	0	0	0	0	0	0	0	0	0	0	0	0	0	0
31351	0	0	0	0	0	0	0	0	0	0	0	0	0	0	0	11	0	1	0	0	0	0	0	1	2	12	0	0	0	0	0	0	0	0	0	0	0	0	0	0	0	0	0	0	0	0	0	0	0
31358	0	0	0	0	0	0	0	0	0	0	0	0	0	0	0	1	0	0	0	0	0	0	0	0	0	0	0	0	0	0	0	0	0	0	0	0	0	0	0	0	0	1	2	3	7	1	3	5	0
31372	0	0	0	0	0	0	0	0	0	0	0	0	0	0	0	16	0	6	6	10	25	55	1	8	0	0	0	0	0	0	0	0	0	0	0	0	0	0	0	0	0	0	0	0	0	0	0	0	0
31397	0	0	0	0	0	0	0	0	0	0	0	0	0	0	0	0	0	0	0	0	0	0	0	0	0	0	0	0	0	0	0	0	0	0	0	0	0	0	0	0	0	0	0	0	0	0	0	0	0
31437	0	0	1	0	0	0	0	2	0	0	1	0	0	1	0	0	0	5	14	0	0	0	18	36	0	0	0	0	0	0	0	0	0	0	0	0	0	0	0	1	0	0	0	0	0	13	0	1	12
31445	0	0	0	0	0	0	0	0	0	0	0	0	0	0	0	0	0	0	0	0	0	0	0	0	0	0	0	0	0	0	0	0	0	0	0	0	0	0	0	0	0	0	0	0	0	0	0	0	0
31459	0	0	0	0	0	0	0	0	0	0	0	0	0	0	0	0	0	0	0	0	0	0	0	0	0	0	0	0	0	2	2	0	0	0	0	0	0	0	0	0	0	0	0	0	0	0	0	0	0
31479	0	0	0	0	0	0	0	0	0	0	0	0	0	0	0	0	0	0	0	0	0	0	0	0	0	0	0	0	0	0	0	0	0	0	0	0	0	0	0	0	0	0	0	0	0	0	0	0	0
31482	0	0	0	0	0	0	0	0	0	0	0	0	0	0	0	0	0	0	0	0	0	0	0	0	0	0	0	0	0	0	0	0	0	0	0	0	0	0	0	0	0	0	0	0	0	0	0	0	0
31494	0	0	0	0	0	0	0	0	0	0	0	0	0	0	0	1	0	2	3	0	0	0	0	0	0	0	0	2	0	0	0	0	0	0	0	0	0	0	0	0	0	0	0	0	0	0	0	0	0
31498	0	0	0	3	0	29	29	24	23	0	0	0	28	0	0	0	0	0	0	0	0	0	0	0	0	0	0	0	0	0	0	0	0	0	9	4	11	0	0	0	0	0	0	0	0	0	0	0	2
31502	0	0	0	0	0	0	0	0	0	0	0	0	0	0	0	0	0	0	0	0	0	192	4	0	0	0	0	0	0	0	0	0	0	0	0	0	0	0	0	0	0	0	0	0	0	0	0	0	0
31516	0	0	0	0	0	0	0	0	0	0	0	0	0	0	0	7	11	0	0	0	11	19	2	0	0	0	0	3	3	0	0	0	0	0	0	0	0	0	0	0	0	0	0	0	0	0	0	0	0
31522	0	0	0	0	0	0	0	0	0	0	0	0	0	0	0	0	0	0	0	0	0	0	0	0	0	0	0	0	0	0	0	0	0	0	0	0	0	0	0	0	0	0	0	0	0	0	0	0	0
31594	0	0	6	0	7	4	6	21	3	0	0	0	0	0	0	0	0	0	0	0	0	0	0	0	0	0	0	0	0	1	1	0	0	0	11	16	6	60	1	0	0	14	24	7	3	3	0	1	0
31603	1	34	1	0	233	197	184	13	107	1	0	4	12	1	0	0	0	0	0	0	0	0	0	0	0	0	0	0	0	0	2	0	3	1	19	17	32	80	2	0	0	4	5	3	7	0	10	6	1
31648	0	0	0	0	0	0	0	0	0	0	0	0	0	0	0	0	0	0	0	0	0	4	0	0	0	0	0	0	0	0	0	0	0	0	0	0	0	0	0	0	0	0	0	0	0	1	0	0	0
31690	0	0	0	0	0	0	0	0	0	0	0	0	0	0	0	0	0	11	61	54	0	0	0	0	0	0	0	2	3	0	0	0	0	0	0	0	0	0	0	0	0	0	0	0	0	0	0	0	0
31702	0	0	0	0	0	0	0	0	0	0	0	0	0	0	0	0	0	0	0	0	0	0	0	0	0	1	2	16	43	0	0	0	0	0	0	0	0	0	0	0	0	0	0	0	0	0	0	0	0
31732	0	0	0	0	0	0	0	0	0	0	3	0	0	0	0	6	7	30	0	0	0	0	0	107	0	0	0	0	0	0	0	0	0	0	0	0	0	0	0	0	0	0	0	0	0	0	0	0	0
31776	0	0	1	0	0	0	0	0	0	7	6	0	0	0	2	0	0	0	0	0	0	0	6	0	0	0	0	0	0	0	0	0	39	15	0	0	0	0	0	0	0	0	0	0	0	0	0	0	0
31778	0	0	0	0	0	0	0	0	0	45	94	0	0	0	0	0	0	2	0	0	0	0	2	0	0	0	0	0	0	0	0	15	1	0	0	1	0	0	0	3	12	2	1	0	0	0	0	0	0
31782	0	0	0	0	0	137	189	0	0	0	0	0	0	0	0	0	0	0	0	0	0	0	36	0	0	0	0	0	0	0	0	0	0	0	0	0	0	0	0	0	0	0	0	0	0	0	0	0	0
31914	0	0	0	0	0	0	0	0	0	0	0	0	0	0	0	1	0	12	49	47	6	1	0	4	0	1	0	0	0	0	0	0	0	0	0	0	0	0	0	0	0	0	0	0	0	0	0	0	0
31929	0	0	0	5	16	43	43	8	7	0	0	0	33	0	0	0	0	0	0	0	0	0	0	0	0	0	0	0	0	0	2	0	0	0	5	5	4	4	0	0	0	0	0	1	3	11	4	1	4
31950	0	0	0	2	16	4	5	6	2	0	0	0	7	0	0	0	4	0	0	0	0	0	0	0	0	0	0	0	0	0	0	0	0	0	0	0	0	0	0	0	0	0	0	0	0	3	5	0	0
32022	0	0	0	0	0	1	0	1	0	2	0	0	2	0	0	1	0	0	0	0	1	0	0	0	0	0	0	2	0	0	0	0	0	0	0	0	0	0	0	0	0	17	18	23	0	0	0	0	0
32029	0	0	0	0	0	0	0	0	0	0	0	0	0	0	0	0	0	0	0	0	0	0	0	0	3	9	2	31	6	0	0	0	0	0	0	0	0	0	0	0	0	0	0	0	0	0	0	0	0
32030	0	0	0	0	0	0	0	0	0	0	0	0	0	0	0	0	0	0	0	0	0	0	0	0	128	71	2	167	78	0	0	0	0	0	0	0	0	0	0	0	0	0	0	0	0	0	0	0	0
32046	3	0	1	0	0	0	0	0	0	0	0	0	0	10	7	0	0	19	20	0	0	0	25	0	0	0	0	0	0	1	0	0	0	0	0	0	0	0	0	0	0	0	0	0	1	1	0	0	0
32053	0	0	0	0	0	0	0	0	0	0	0	0	0	0	0	3	12	30	0	2	1	0	0	1	3	0	1	10	3	0	0	0	0	1	10	4	12	0	0	0	0	3	12	0	0	0	3	0	0
32058	0	0	0	0	0	0	0	0	0	0	0	0	0	0	0	0	1	0	0	0	0	0	0	0	0	0	0	1	1	0	0	0	0	0	0	0	0	0	0	0	0	0	0	0	0	0	0	0	0
32095	0	0	0	0	0	0	0	0	0	0	0	0	0	0	0	0	0	0	0	0	0	0	0	0	0	0	0	0	1	0	0	0	0	0	0	0	0	1	0	0	0	1	1	2	0	1	0	0	0
32122	0	0	0	0	0	0	0	0	0	0	0	0	0	0	0	0	0	0	0	0	0	0	0	0	0	0	0	0	0	0	0	0	0	0	0	0	0	0	0	0	0	0	0	0	0	0	0	0	0
32130	0	0	0	0	0	0	0	0	0	0	0	0	0	0	0	0	1	5	0	0	0	0	0	0	0	0	0	0	0	0	0	0	0	0	0	0	0	0	0	0	0	0	0	0	0	0	0	0	0
32221	53	9	13	71	0	2	0	4	1	61	122	143	0	406	264	0	0	314	318	0	0	0	213	1	0	0	0	0	0	18	8	33	258	181	42	30	29	19	2	2	10	659	527	835	175	145	171	75	151
32229	0	0	0	0	0	0	0	0	0	0	0	0	0	0	0	0	0	0	0	0	0	0	0	0	0	0	0	0	0	0	0	0	0	0	0	0	0	0	0	0	0	20	22	17	0	0	0	0	1
32278	0	0	0	0	0	0	0	0	0	0	0	1	0	1	1	1	0	9	0	24	1	0	2	0	0	0	0	0	0	0	0	0	0	0	0	0	0	0	0	0	0	0	0	0	1	0	0	2	4
32280	0	0	0	0	0	0	0	0	0	0	0	0	0	0	0	0	2	0	0	0	0	0	0	0	0	0	0	0	0	0	0	0	0	0	0	0	0	0	0	0	0	0	0	0	0	0	0	0	0
32281	50	3	14	0	0	0	0	0	0	0	0	6	0	0	0	0	0	0	0	0	0	0	0	0	0	0	0	0	0	0	0	0	1	0	0	0	0	0	0	0	0	0	0	0	0	0	0	0	0
32284	14	2	2	4	0	0	0	6	0	4	0	2	0	0	3	0	0	0	0	0	0	0	1	0	0	0	0	0	0	0	0	0	0	3	22	5	29	0	0	2	5	296	369	103	29	25	25	6	15
32289	0	0	0	0	0	0	0	0	0	0	0	0	0	0	0	3	77	0	0	0	12	219	0	0	0	0	0	0	0	0	0	0	0	0	0	0	0	0	0	0	0	0	0	0	38	3	22	6	0
32310	0	0	0	0	2	1	5	0	3	0	0	0	0	0	0	1	5	0	1	0	6	0	0	0	7	1	0	1	3	0	0	0	0	0	0	0	0	0	0	0	0	0	0	0	0	0	0	1	0
32391	0	0	0	0	0	0	0	0	0	0	0	0	0	0	0	4	0	28	98	3	16	2	1	1	0	0	0	0	0	0	0	0	0	0	0	0	0	0	0	0	0	0	0	0	0	0	0	0	0
32398	0	0	0	1	16	3	12	8	3	0	0	0	2	0	0	0	11	2	2	4	23	16	28	7	14	0	1	7	7	0	0	0	0	0	0	0	1	0	0	0	0	0	0	1	2	3	11	16	2
32428	1	1	0	7	0	0	0	30	3	0	0	4	0	0	1	12	1	0	0	0	1	0	30	133	0	0	3	19	42	0	0	0	0	0	0	2	2	0	0	0	0	4	6	6	29	30	26	30	18
32439	0	0	0	0	0	0	0	0	0	0	0	0	0	0	0	0	0	0	0	0	0	0	0	0	0	0	0	0	0	0	0	0	0	0	0	0	0	0	0	0	0	0	0	0	0	0	0	0	0
32449	0	0	0	0	0	0	0	0	0	32	50	0	0	0	0	0	0	1	3	0	0	0	9	0	0	0	0	0	0	0	0	106	4	6	0	0	0	0	0	0	0	2	7	3	0	0	0	0	0
32472	0	0	0	0	0	0	0	0	0	0	0	0	0	0	0	0	0	0	0	0	0	0	0	0	72	50	78	107	18	0	0	0	0	0	0	0	0	0	0	0	0	0	0	0	0	0	0	0	0
32494	0	0	0	0	0	0	0	0	0	0	0	0	0	0	0	0	1	0	0	0	0	0	0	3	3	8	3	38	13	0	0	0	0	0	0	0	0	0	0	0	0	0	0	0	0	0	0	2	0
32533	0	0	0	0	0	0	0	0	0	0	0	0	0	0	0	0	0	0	0	0	0	0	0	0	0	0	0	0	0	0	1	5	0	0	167	111	363	4	8	0	0	2	5	3	4	31	11	33	17
32539	41	1	9	0	0	0	0	1	0	5	3	37	0	0	0	0	0	0	0	0	0	0	0	0	0	0	0	0	0	20	19	5	2	9	95	37	25	0	0	0	0	0	0	0	4	12	2	1	30
32545	0	0	0	0	0	0	0	0	0	0	0	0	0	3	0	22	0	1	1	0	0	0	0	1	0	0	0	0	0	3	3	0	5	7	3	2	0	40	6	0	0	0	0	0	0	1	0	0	1
32573	0	0	0	0	0	0	0	0	0	0	0	0	0	0	0	0	0	0	0	0	0	0	0	0	0	0	0	0	0	0	0	0	0	0	0	0	0	0	0	0	0	0	0	0	18	0	12	16	0
32609	0	0	0	0	0	0	0	0	0	0	0	0	0	0	0	0	123	0	0	0	0	0	0	0	0	0	0	0	1	0	0	0	0	0	0	0	0	0	0	0	0	0	0	0	0	0	0	0	0
32685	0	0	0	0	0	0	0	0	0	0	0	0	0	0	0	0	11	0	0	0	10	0	0	0	5	1	5	0	11	0	0	1	0	0	0	0	0	0	0	0	0	0	0	0	0	0	0	0	0
32687	876	940	853	881	1	1	1	1252	803	132	35	823	1	763	1618	0	6	625	1577	2	1	0	264	3123	0	0	0	0	0	612	702	30	374	305	2004	2526	2303	757	639	0	0	46	22	40	396	467	325	436	799
32732	6	0	1	0	0	0	0	1	0	2	3	1	0	0	0	0	0	13	27	0	0	0	6	0	0	0	0	0	0	0	0	0	0	0	0	0	0	0	0	0	0	0	3	2	0	0	0	1	3
32745	0	0	0	0	0	0	0	0	0	0	0	0	0	0	0	0	0	0	0	0	0	0	0	0	0	0	0	0	0	0	0	0	0	0	0	0	0	0	0	0	0	11	63	2	0	0	0	0	0
32754	0	0	0	0	0	0	0	0	0	0	0	0	0	0	0	0	15	0	0	0	0	11	0	7	54	0	11	21	74	0	0	0	0	0	0	0	0	1	0	0	0	0	0	0	0	3	0	0	0
32798	0	0	0	0	0	0	0	0	0	0	0	0	0	0	0	0	0	0	0	0	0	0	0	1	0	0	0	0	0	0	0	0	0	0	0	0	0	0	0	0	0	0	0	0	0	0	0	0	0
32811	0	0	0	0	0	0	0	0	0	0	0	0	0	0	0	2	1	14	45	2	93	6	1	2	0	0	0	0	0	0	0	0	0	0	0	0	0	0	0	0	0	0	0	0	0	0	0	0	0
32819	0	0	0	0	0	0	0	0	0	0	0	0	0	0	0	0	17	0	0	0	0	0	0	0	0	0	0	0	0	0	0	0	0	0	0	0	0	0	0	0	0	0	0	0	0	0	0	0	0
32834	0	0	0	1	2	17	32	0	0	0	0	0	15	0	0	15	17	0	0	0	0	0	0	9	0	0	0	0	0	0	0	0	0	0	0	0	0	0	0	0	0	0	0	0	2	2	4	9	10
32854	0	0	0	0	0	0	0	0	0	0	27	0	0	0	0	0	0	0	1	0	0	0	54	0	0	0	0	0	0	0	0	0	0	0	0	0	0	0	0	0	0	0	0	0	0	0	0	0	0
32855	0	0	0	0	0	0	0	0	0	0	0	0	0	0	0	0	0	0	0	0	0	0	0	0	70	15	36	132	50	0	0	0	0	0	0	0	0	0	0	0	0	0	0	0	0	0	0	0	0
32866	0	0	0	0	0	0	0	0	0	0	0	0	0	0	0	0	0	0	0	0	0	0	5	1	0	0	0	0	0	0	0	2	0	1	0	0	0	0	0	0	0	28	9	12	0	0	0	0	0
32872	0	0	0	0	0	0	0	0	0	0	0	0	0	0	0	0	0	0	0	0	0	4	0	0	0	0	0	0	0	0	0	0	0	0	0	0	0	0	0	0	0	0	0	0	0	0	0	0	0
32875	104	11	33	0	1	0	0	4	9	11	12	300	0	27	7	0	0	2	20	0	0	0	86	0	0	0	0	0	0	6	1	530	1892	5270	0	0	0	0	0	0	0	9	3	30	2	2	0	0	3
32885	0	0	0	0	0	0	0	0	0	0	0	0	0	0	1	0	0	0	0	0	24	0	22	2	0	0	0	0	8	3	1	0	0	0	0	0	0	0	0	0	0	4	7	1	0	0	0	0	0
32922	0	0	0	0	0	0	0	0	0	4	1	0	0	0	0	0	0	0	0	0	0	0	0	0	0	0	0	0	0	0	0	28	0	0	0	0	0	0	0	0	0	0	2	1	0	0	0	0	21
32949	0	0	1	1	1	7	4	3	0	0	0	0	31	1	0	0	0	0	0	0	0	0	0	0	0	0	0	0	0	0	0	0	3	0	1	3	1	2	0	0	0	0	0	0	1	0	0	0	0
32966	0	0	0	0	0	0	0	0	0	0	0	0	0	0	0	0	0	0	0	0	0	0	0	0	0	0	0	0	0	0	0	0	0	0	0	0	0	0	0	0	0	0	0	0	0	0	0	0	0
32969	0	0	0	9	2	12	14	3	9	0	0	0	0	0	0	0	0	0	0	0	2	0	3	1	6	0	0	2	13	0	0	0	0	0	0	0	0	0	0	0	0	0	0	0	0	0	1	1	0
32970	0	0	0	10	35	23	129	75	145	0	0	0	90	0	0	0	0	0	0	0	0	0	0	0	0	0	0	0	0	0	0	0	0	0	8	6	10	1	0	0	0	4	6	1	6	22	8	10	12
32974	2	0	0	0	0	0	0	0	0	8	7	0	0	0	1	0	0	1	9	0	0	0	13	0	0	0	0	0	0	0	0	29	0	0	0	0	0	0	0	0	0	0	0	0	0	0	0	0	0
32994	0	0	0	0	0	0	0	0	0	0	0	0	0	0	0	0	0	0	0	0	0	0	0	0	0	0	0	0	0	0	0	0	0	0	0	0	0	0	0	0	0	0	0	0	0	0	0	0	0
33057	0	3	0	96	57	346	210	173	199	0	0	9	138	0	0	0	0	0	0	0	0	0	0	0	0	0	0	0	0	0	0	0	0	0	0	0	0	0	0	0	0	0	1	0	0	0	0	0	0
33067	0	0	0	0	0	0	0	0	0	0	0	0	0	0	0	0	0	0	0	0	5	0	0	22	0	0	0	1	0	0	0	0	0	0	0	0	0	0	0	0	0	0	0	0	0	0	0	0	0
33068	0	0	0	0	0	0	0	0	0	0	0	0	0	0	0	1	1	4	5	0	3	3	0	1	0	1	0	1	0	0	0	0	0	0	0	0	0	0	0	0	0	0	0	0	0	1	0	1	0
33071	0	0	0	0	0	0	0	0	0	79	82	0	0	0	0	0	0	0	0	0	0	0	0	0	0	0	0	0	0	0	0	0	1	0	0	0	0	0	0	0	0	0	0	0	0	0	0	0	0
33096	0	0	23	0	0	0	0	0	0	0	0	0	0	0	0	0	0	0	0	0	0	0	0	0	0	0	0	0	0	0	0	0	0	0	0	0	0	0	0	0	0	2	1	1	9	5	2	7	0
33107	0	0	0	0	0	0	0	0	0	0	0	0	0	0	0	0	4	0	0	0	0	0	0	0	0	0	0	0	0	0	0	0	0	0	0	0	0	0	0	0	0	0	1	0	18	6	5	11	1
33111	0	2	0	0	0	0	0	2	0	0	0	1	0	0	0	238	0	4	15	1	0	0	0	0	0	0	0	0	0	0	0	0	0	1	2	0	4	0	0	13	1	0	0	0	4	0	1	3	4
33133	0	0	0	0	0	0	0	0	0	0	0	0	0	0	0	0	0	0	0	0	0	0	0	0	0	0	0	0	0	0	0	0	0	0	0	0	0	0	0	0	0	0	0	0	0	0	0	0	0
33135	0	0	0	0	0	0	0	0	0	0	0	0	0	0	0	0	0	0	0	0	0	0	0	0	0	0	0	0	0	0	0	0	0	0	0	0	0	0	0	0	0	9	23	19	0	0	0	0	0
33173	0	0	0	0	0	0	0	0	0	0	0	0	0	0	0	0	0	0	0	0	0	0	0	0	0	0	0	0	0	0	0	0	0	0	0	0	0	0	0	0	0	0	0	0	0	0	0	0	0
33185	0	0	0	0	0	0	0	0	0	1	1	0	0	0	0	0	0	0	0	0	0	0	2	0	0	0	0	0	0	6	7	9	15	41	1	3	0	12	13	0	0	0	0	1	0	0	0	0	1
33191	0	0	0	0	0	0	0	0	0	0	0	0	0	0	0	0	0	0	0	0	0	0	0	0	0	0	0	0	0	0	0	0	0	0	0	0	0	0	0	0	0	0	0	0	0	0	0	0	0
33251	0	0	0	0	0	0	0	0	0	0	0	0	0	0	0	0	69	0	0	0	0	20	0	0	0	0	0	0	1	0	0	0	0	0	0	0	0	1	0	0	0	0	0	0	0	0	0	0	0
33281	0	0	0	0	0	0	0	0	0	0	0	0	0	0	0	0	0	0	0	0	0	0	1	0	0	0	0	0	0	0	0	0	0	0	0	0	0	0	0	0	0	0	0	0	0	0	0	0	0
33324	0	0	0	0	0	0	0	0	0	0	0	0	0	0	0	0	0	0	1	0	0	0	32	7	0	0	0	0	0	0	0	0	0	0	0	0	0	0	0	0	0	0	0	0	0	0	0	0	0
33331	0	0	0	3	0	0	0	4	0	0	0	0	0	0	0	1	15	0	0	17	0	0	5	3	2	0	0	0	0	0	0	0	0	0	0	0	0	0	0	0	0	0	0	0	0	0	0	0	0
33363	0	0	0	0	0	0	0	0	0	0	0	0	0	0	0	5	3	0	0	0	0	0	0	6	1	0	0	0	2	0	0	0	0	0	0	0	0	0	0	0	0	0	0	0	0	0	0	0	0
33381	6	12	1	27	17	7	11	10	6	0	0	0	119	0	0	0	0	0	0	0	0	0	0	0	0	0	0	0	0	0	0	0	0	0	3	1	0	13	2	0	0	0	3	2	0	21	3	1	5
33398	0	0	0	0	0	0	0	0	0	0	0	0	0	0	90	0	0	0	0	0	0	0	2	0	0	0	0	0	0	0	0	0	0	0	0	0	0	1	0	0	0	0	0	0	0	0	0	0	0
33465	0	0	0	0	0	0	0	0	0	0	0	0	0	0	0	0	0	0	0	0	0	0	0	0	0	0	0	0	0	0	0	0	0	0	0	0	0	0	0	0	0	0	0	0	0	0	0	0	0
33468	0	0	0	0	0	0	0	0	0	0	0	0	0	0	0	0	0	0	9	0	0	4	2	1	4	1	0	1	1	0	0	0	0	0	0	0	0	0	0	0	0	0	0	0	0	0	0	0	0
33552	0	0	0	0	0	0	0	0	0	0	0	0	1	0	0	2	16	7	2	0	2	53	0	0	1	1	0	2	5	0	0	0	0	0	0	0	0	0	0	0	0	0	0	0	0	0	0	0	0
33556	0	0	0	0	0	0	0	0	0	0	0	0	0	0	0	0	1	0	0	0	0	0	0	0	0	0	1	4	1	0	0	0	0	0	0	0	0	0	0	0	0	1	0	0	6	1	6	6	2
33573	0	0	0	0	0	0	0	0	0	0	0	0	0	0	0	2	0	2	32	3	0	159	0	1	0	0	0	0	0	0	0	0	0	0	0	0	0	0	0	0	0	0	0	0	0	0	0	0	0
33622	0	0	0	0	0	0	0	0	0	118	1	0	0	0	0	0	0	0	0	0	0	0	0	0	0	0	0	0	0	0	0	0	1	0	0	0	0	0	0	0	0	0	0	0	0	0	0	0	0
33645	0	0	0	0	0	0	0	0	0	0	0	0	0	0	0	8	0	1	0	0	136	0	7	0	0	0	0	0	0	0	0	0	0	0	0	0	0	0	0	0	0	0	0	0	0	0	0	0	0
33680	0	0	0	0	0	0	0	0	0	33	33	0	0	0	0	0	0	0	0	0	0	0	0	0	0	0	0	0	0	0	0	4	0	0	0	0	0	0	0	0	0	0	0	0	0	0	0	0	0
33892	0	0	0	0	0	0	0	0	0	0	0	0	0	0	0	5	0	0	0	0	19	28	0	0	0	0	0	0	0	0	0	0	0	0	0	0	0	0	0	0	0	0	0	0	0	0	0	0	0
33895	0	0	0	0	0	0	0	0	0	0	0	0	0	0	0	0	1	1	0	0	0	0	0	0	0	0	0	0	0	0	0	0	0	0	0	0	0	0	0	0	0	0	0	0	0	0	0	0	0
33900	0	0	0	0	0	0	0	0	0	0	0	0	0	0	0	0	0	0	0	0	0	0	0	0	0	0	0	0	0	0	0	0	0	0	0	0	0	0	0	0	0	0	0	0	0	0	0	0	0
33910	0	1	0	0	3	1	0	0	1	0	0	0	5	0	0	0	0	0	0	0	0	0	0	0	0	0	0	0	0	0	0	0	0	0	3	0	1	1	0	0	0	0	0	0	2	8	4	12	5
33919	0	0	0	0	0	0	0	0	0	0	0	0	0	0	0	2	5	0	4	2	7	1	3	3	0	1	0	6	7	0	0	0	0	0	0	0	0	0	0	0	0	0	0	0	0	0	0	0	0
33960	0	0	0	0	34	0	0	2	0	0	0	0	0	0	0	16	1	203	41	15	8	1	6	67	0	0	0	0	3	0	0	0	0	0	0	0	0	0	0	0	0	0	0	0	2	0	3	5	0
33996	0	0	0	0	0	0	0	0	0	0	0	0	0	0	0	0	6	0	0	0	0	0	0	0	0	0	0	0	5	0	0	0	0	0	0	0	0	0	0	0	0	0	0	0	0	0	0	0	0
34029	0	0	0	0	0	0	0	0	0	0	0	0	0	0	0	1	0	5	3	0	0	0	0	0	32	0	6	6	65	0	0	0	0	0	0	0	0	33	0	0	0	0	0	1	0	2	0	1	1
34040	0	0	0	0	0	0	0	0	0	0	0	0	0	0	0	0	0	0	0	0	0	0	0	0	10	1	4	72	47	0	0	0	0	0	0	0	0	0	0	0	0	0	0	0	0	0	0	0	0
34061	0	0	0	5	0	0	0	1	2	0	0	0	0	0	0	0	2	201	55	0	1	0	4	169	0	0	0	0	0	0	0	0	0	0	0	2	0	0	1	0	0	0	0	0	1	4	2	1	11
34075	0	0	0	1	7	2	2	1	6	0	0	0	1	0	0	0	1	0	0	0	1	1	0	0	1	1	0	3	0	0	0	0	0	0	0	0	0	0	0	0	0	0	0	0	1	0	0	0	0
34082	0	0	0	0	0	0	0	0	0	3	1	0	0	0	0	0	0	0	0	0	0	0	0	0	0	0	0	0	0	0	0	0	1	15	0	0	0	0	0	0	0	34	46	7	1	1	0	0	0
34083	0	0	0	0	0	0	0	0	0	27	32	0	0	0	0	0	0	0	0	0	0	0	0	0	0	0	0	0	0	0	0	4	0	0	0	0	0	0	0	0	0	0	0	0	0	0	0	0	0
34115	72	3	0	0	0	0	0	0	0	19	2	299	0	0	1	0	0	0	0	0	0	0	0	0	0	0	0	0	0	0	0	66	151	81	35	23	19	0	0	0	0	0	0	0	0	0	0	0	2
34130	0	1	1	9	47	54	166	57	123	0	0	1	31	3	1	4	892	0	10	0	1	19	11	8	0	0	1	0	2	0	0	0	0	1	0	0	0	2	0	0	0	0	0	1	0	4	0	4	4
34141	0	0	0	0	0	0	0	0	0	0	0	15	0	0	4	0	0	0	0	0	0	0	3	0	0	0	0	0	0	0	0	0	0	0	0	0	0	0	0	0	0	0	0	0	5	3	2	0	11
34177	0	0	0	0	0	0	0	0	0	0	0	0	0	0	0	0	0	2	5	2	0	0	0	3	0	0	0	0	0	0	0	0	0	0	0	0	0	0	0	0	0	0	0	0	0	0	0	0	0
34179	1	0	0	5	16	21	19	11	17	0	0	0	3	0	0	0	0	0	0	0	0	0	0	0	0	0	0	0	0	0	0	0	0	0	1	1	4	0	0	0	0	0	0	0	0	0	0	0	0
34204	0	0	0	0	0	0	0	0	0	29	20	0	0	0	0	0	0	0	3	0	0	0	5	0	0	0	0	0	0	0	0	0	1	0	0	0	0	0	0	0	0	0	0	0	0	1	0	1	1
34210	0	0	0	0	0	0	0	0	0	0	0	0	0	0	0	1	1	188	263	3	0	94	4	14	0	0	0	1	0	0	0	0	0	0	0	0	0	0	0	0	0	0	0	0	0	0	0	0	0
34258	0	0	0	0	0	0	0	0	0	0	0	0	0	0	0	0	0	0	0	0	0	0	0	0	0	0	0	0	0	0	0	0	0	0	0	0	0	0	0	38	16	0	0	0	0	0	0	0	0
34271	0	0	0	0	0	0	0	0	0	0	0	0	0	0	0	0	0	0	0	0	0	0	0	0	0	0	0	0	0	0	0	0	0	0	0	0	0	0	0	48	73	0	0	0	0	0	0	0	0
34294	0	0	0	0	0	0	0	0	0	0	0	0	0	0	0	0	8	0	0	0	18	16	0	0	0	0	0	0	0	0	0	0	0	0	0	0	0	0	0	0	0	1	0	0	0	1	1	1	0
34298	0	0	0	0	0	0	0	0	0	0	0	0	0	0	0	0	3	0	0	0	0	36	0	2	0	0	0	0	0	0	0	0	0	0	0	0	0	0	0	0	0	0	0	0	0	2	1	1	0
34328	0	0	0	0	0	0	0	0	0	0	0	0	0	0	0	9	9	12	91	0	0	1	10	2	1	0	0	1	3	0	0	0	0	0	0	0	0	0	0	0	0	0	0	0	0	0	0	0	0
34372	0	0	0	0	0	0	0	0	0	0	0	0	0	0	0	3	0	0	0	0	0	0	1	0	1	6	2	7	21	0	0	0	0	0	0	0	0	0	1	0	0	0	0	0	0	0	0	0	0
34374	0	0	0	0	0	0	0	0	0	0	0	0	0	0	0	0	0	0	0	0	13	0	0	1	0	0	0	0	0	0	0	0	0	0	0	0	0	0	0	0	0	0	0	0	0	0	0	0	0
34401	12	2	7	7	0	0	0	16	11	3	1	9	0	4	13	0	0	3	6	0	0	0	1	14	0	0	0	0	0	1	4	0	3	3	22	22	9	6	7	0	0	0	0	1	2	1	4	3	10
34403	1	0	0	0	0	0	0	0	0	2	0	3	0	10	2	0	0	0	1	0	0	0	23	2	0	0	0	0	0	0	0	0	0	0	0	0	0	0	0	0	0	0	0	0	1	1	1	5	1
34455	0	0	0	0	0	1	1	0	0	0	0	0	0	0	0	0	0	0	0	0	0	0	0	0	0	0	0	0	0	14	14	0	3	0	26	18	27	53	3	0	0	16	30	13	182	555	202	252	279
34525	0	0	0	0	0	0	0	0	0	0	0	0	0	0	0	0	0	0	0	0	0	0	0	0	0	0	0	0	0	0	0	0	0	0	0	0	0	0	0	0	0	50	47	212	0	0	0	0	0
34544	0	0	0	0	0	0	0	0	0	0	0	0	0	0	0	1	0	0	0	0	0	2	0	0	2	14	0	3	0	0	0	0	0	0	0	0	0	0	1	0	0	0	0	0	0	0	0	0	0
34611	0	0	0	0	0	0	0	0	0	0	0	0	0	0	0	0	0	0	0	0	0	0	0	0	169	86	5	165	163	0	0	0	0	0	0	0	0	0	0	0	0	0	0	0	0	0	0	0	0
34632	0	0	0	0	0	0	0	0	0	0	0	0	0	0	0	0	0	0	0	0	0	0	0	0	0	0	0	0	0	2	18	0	0	2	2	5	4	40	5	0	0	2	4	3	76	84	28	78	87
34638	0	0	0	0	0	0	0	0	0	0	0	0	0	0	0	8	3	19	2	0	11	2	3	31	0	0	0	0	0	0	0	0	0	0	0	0	0	0	0	0	0	0	0	0	0	0	0	0	0
34671	0	0	0	0	0	0	0	0	0	0	0	0	0	0	0	0	0	0	0	0	0	0	0	0	0	0	0	0	0	0	0	0	0	0	0	0	0	0	0	0	0	0	0	0	0	0	0	0	0
34792	0	0	0	0	0	0	0	0	0	1	0	0	0	0	0	0	0	0	0	0	0	0	0	0	0	0	0	0	0	0	0	0	0	0	0	0	0	0	0	0	0	17	73	17	0	0	0	0	0
34793	0	0	0	0	0	0	0	0	0	0	0	0	0	0	0	0	0	0	0	0	0	0	0	0	0	0	0	0	0	0	0	0	9	15	4	21	6	0	0	0	0	2	0	8	0	0	0	0	0
34817	0	0	0	0	0	0	0	0	0	0	0	0	0	0	0	3	19	0	0	0	0	0	0	23	0	0	0	0	0	0	0	0	0	0	0	0	0	0	0	0	0	0	0	0	0	0	0	0	0
34892	0	0	0	0	0	0	2	1	1	0	0	0	0	0	0	5	5	0	4	0	3	28	3	18	13	10	3	2	10	0	0	0	0	0	0	0	0	0	0	0	0	0	0	0	2	0	3	4	0
34909	0	0	0	0	0	0	0	0	0	0	0	0	0	0	0	0	0	0	0	0	0	0	0	0	0	0	0	0	0	0	0	0	0	0	2	0	1	0	0	0	0	0	0	0	6	0	6	2	1
34922	0	0	0	0	0	0	0	0	0	0	0	0	0	0	0	1	0	1	0	0	32	6	0	0	0	4	3	3	1	0	0	0	0	0	0	0	0	0	0	0	0	0	0	0	0	0	0	0	0
35004	2	0	0	2	24	20	11	57	8	0	0	0	59	1	0	0	0	0	0	0	0	0	0	0	0	0	0	0	0	0	0	0	0	0	0	0	0	0	0	0	0	0	0	0	0	0	0	0	0
35030	1	0	0	0	0	0	0	0	0	24	36	1	0	0	0	0	0	1	2	0	0	0	0	0	0	0	0	0	0	0	0	19	0	1	0	0	0	0	0	0	0	0	0	0	1	0	0	0	0
35044	0	0	0	0	0	0	0	0	0	0	0	0	0	0	0	0	0	0	0	0	0	0	1	0	25	26	7	41	29	0	0	0	0	0	0	0	0	0	0	0	0	0	0	0	0	0	0	0	0
35058	0	0	0	0	0	0	0	0	0	37	19	0	0	0	0	0	0	0	1	0	0	0	4	0	0	0	0	0	0	0	0	0	1	0	0	0	0	0	0	0	0	0	0	0	0	0	0	0	0
35111	0	0	0	0	0	6	19	0	0	0	0	0	0	0	0	0	0	0	0	0	0	7	0	1	0	0	0	0	0	0	0	0	0	0	1	2	0	0	0	0	0	0	0	0	1	0	0	0	0
35118	0	0	0	0	0	0	1	0	0	0	0	0	38	0	0	0	0	0	0	0	0	0	0	0	0	0	0	0	0	0	0	0	0	0	0	0	0	0	0	0	0	0	0	0	0	0	0	0	0
35148	0	0	0	0	0	0	0	0	0	0	0	0	0	0	0	0	0	0	0	0	0	0	0	0	39	206	81	461	65	0	0	0	0	0	0	0	0	0	0	0	0	0	0	0	0	0	0	0	0
35150	0	0	0	0	0	0	0	0	0	0	0	0	0	0	0	0	0	0	0	0	1	27	0	0	61	13	2	8	9	0	0	0	0	0	0	0	0	1	0	0	0	0	0	0	0	0	0	0	0
35156	0	0	0	0	0	0	0	0	0	0	0	0	0	0	0	0	1	1	0	0	0	0	0	0	0	0	0	0	0	0	0	0	0	0	0	0	0	0	0	0	0	0	0	0	0	0	0	0	0
35167	0	0	0	0	0	0	0	2	2	0	0	0	3	0	0	0	0	3	3	0	0	0	1	1	0	0	0	0	0	0	0	0	0	0	0	0	0	0	0	0	0	0	0	0	0	0	0	0	0
35190	0	0	0	0	0	0	0	0	0	83	11	0	0	0	0	0	0	0	0	0	0	0	0	0	0	0	0	0	0	0	0	0	1	0	0	0	0	0	0	0	0	0	0	0	0	0	0	0	0
35193	0	0	0	0	2	2	4	4	6	0	0	0	2	0	0	0	31	1	1	0	4	19	4	3	0	0	0	0	0	0	0	0	0	0	0	0	0	1	0	0	0	0	0	0	3	3	1	1	1
35220	1276	40	19	0	0	0	0	0	0	1	0	6	1	10	155	0	0	1	9	0	0	0	1	0	0	0	0	0	0	19	71	8	3	5	121	116	276	6	77	0	0	0	0	0	0	4	2	0	0
35295	0	0	0	0	0	0	0	0	0	0	0	0	0	19	6	0	0	3	12	0	0	0	30	3	0	0	0	0	0	0	0	0	0	0	0	0	0	9	2	0	0	0	0	0	0	0	0	0	0
35315	1	5	4	28	75	106	175	25	70	0	0	1	112	0	0	0	0	0	0	0	0	0	0	0	0	0	0	0	0	1	3	0	1	0	12	5	12	20	0	0	0	13	9	12	13	12	10	8	6
35341	0	0	0	0	0	0	0	0	0	0	0	0	0	0	0	0	0	0	4	12	0	0	3	20	7	6	2	14	5	0	0	0	0	0	0	0	0	0	0	0	0	0	0	0	0	0	0	0	0
35396	0	0	0	0	0	0	2	0	0	0	0	0	0	0	0	5	8	0	0	0	0	0	0	0	0	0	0	0	22	0	0	0	0	0	0	0	0	0	0	0	0	0	0	0	2	0	0	0	0
35423	0	0	0	0	0	0	0	0	0	0	0	0	0	0	0	0	62	0	0	0	0	0	0	0	0	0	0	0	1	0	0	0	0	0	0	0	0	0	0	0	0	0	0	0	0	0	0	0	0
35434	0	0	0	0	0	0	0	0	0	0	0	0	0	0	0	0	0	4	30	0	0	0	1	1	4	8	0	0	11	0	0	0	0	0	0	0	0	0	0	0	0	0	0	0	0	0	0	0	0
35487	0	0	0	0	0	0	0	0	0	0	0	0	0	0	0	0	0	0	0	0	0	0	0	0	0	0	0	0	0	0	0	0	0	0	0	0	0	0	0	0	0	0	0	0	0	0	0	0	0
35494	0	0	0	0	0	0	0	0	0	0	0	0	0	0	0	0	0	0	0	0	0	0	0	0	0	0	0	0	0	0	0	0	0	0	0	0	0	0	0	46	17	0	0	0	0	0	0	0	0
35554	0	0	0	0	0	0	0	0	0	0	0	0	0	0	0	0	33	0	0	0	0	0	0	0	0	0	0	0	0	0	0	0	0	0	0	0	0	0	0	0	0	0	0	1	2	17	0	3	3
35563	0	0	0	0	0	0	0	0	0	0	0	0	0	0	0	0	0	197	112	0	0	0	0	0	0	0	0	0	0	0	0	0	0	0	0	0	0	0	0	0	0	0	0	0	0	0	0	0	0
35594	1	0	0	0	1	29	20	2	13	0	0	1	166	0	0	0	28	8	7	9	0	0	79	94	22	1	1	27	37	0	0	0	0	0	0	1	9	0	0	0	0	0	3	2	1	20	1	1	3
35619	0	0	0	0	0	0	0	0	0	0	0	0	0	0	0	0	5	0	0	0	0	49	0	0	0	0	2	0	1	0	0	0	0	0	0	0	0	0	0	0	0	0	0	0	0	0	0	0	0
35637	0	0	0	0	0	0	0	0	0	0	0	0	0	0	0	48	49	4	0	0	2	3	0	8	0	4	0	7	10	0	0	0	0	0	0	0	0	0	0	0	0	0	0	0	0	0	0	0	0
35652	0	1	0	1	4	21	16	4	5	1	0	0	9	0	0	0	0	0	0	0	2	0	0	0	0	0	0	0	0	0	0	0	0	0	1	0	1	1	0	0	0	0	0	0	6	2	8	4	0
35744	0	0	0	0	0	0	0	0	0	0	0	0	0	0	0	0	0	6	2	3	0	0	0	0	0	0	0	0	0	0	0	0	4	2	11	5	38	0	0	0	0	1	1	0	0	0	0	0	0
35779	0	0	0	0	0	0	0	0	0	0	0	0	0	0	0	0	1	33	182	39	0	0	1	3	16	13	0	33	51	0	0	0	0	0	0	0	0	0	0	0	0	0	0	0	0	0	0	0	0
35815	0	0	0	2	0	0	0	0	0	0	0	0	104	0	0	0	0	0	0	0	0	0	6	4	0	0	0	0	0	0	0	0	0	0	0	0	3	0	0	0	0	0	0	0	0	0	0	0	0
35897	0	0	0	0	0	0	0	0	0	0	0	18	0	0	0	0	0	0	0	0	0	0	3	0	0	0	0	0	0	0	2	7	25	6	0	2	0	1	0	0	0	0	0	0	0	0	0	0	0
36010	876	1736	459	328	0	0	0	234	132	104	72	207	0	594	525	1	0	524	2757	0	0	0	172	90	0	0	0	1	0	360	496	33	522	551	1286	501	841	685	78	0	0	214	601	86	332	348	481	228	703
36013	0	0	0	0	0	0	0	0	0	0	0	0	0	0	0	1	12	0	0	0	6	26	0	0	0	0	4	7	0	0	0	0	0	0	0	0	0	0	0	0	0	0	2	0	0	2	0	0	2
36047	0	0	0	0	0	0	0	0	0	0	0	0	0	0	0	0	0	0	0	0	0	0	0	0	0	0	0	0	0	0	0	64	0	1	0	0	0	0	0	0	0	0	0	0	0	0	0	0	0
36052	0	0	0	0	0	0	0	0	0	13	13	0	0	0	0	0	0	0	0	0	0	0	0	0	0	0	0	0	0	0	0	44	0	0	0	0	0	0	0	0	0	0	0	0	0	0	0	0	0
36075	0	0	7	0	0	15	14	0	0	0	0	0	17	0	0	2	1	3	9	0	0	14	1	12	5	4	1	12	5	0	0	0	0	0	0	1	0	0	0	0	0	0	0	0	0	0	0	0	0
36115	23	4	0	59	0	0	0	8	1	0	0	0	0	11	1	33	9	174	212	0	0	0	2	0	0	0	0	0	0	0	1	1	0	0	31	7	17	2	0	0	0	0	0	0	0	0	0	0	0
36147	0	0	0	1	38	0	22	5	8	0	0	0	3	0	0	0	0	0	0	0	0	0	0	0	0	0	0	0	0	0	0	0	0	0	0	0	0	0	0	0	0	0	0	0	0	0	0	0	0
36183	0	0	0	0	0	0	0	0	0	0	0	0	0	0	0	0	0	0	0	0	0	0	0	0	0	0	0	0	0	0	0	0	0	0	0	0	0	0	0	0	0	3	3	1	20	67	23	28	33
36197	0	0	0	0	0	0	0	1	0	0	0	0	3	0	0	0	0	5	67	5	6	4	0	2	2	5	0	1	16	0	0	0	0	0	0	0	0	0	0	0	0	0	0	0	0	0	2	1	0
36205	0	0	0	0	0	0	0	0	0	0	0	0	0	0	0	0	0	0	0	0	0	0	36	0	10	58	0	4	327	0	0	0	0	0	0	0	0	0	0	0	0	0	0	0	0	0	0	0	0
36216	0	1	2	14	11	31	41	4	7	0	0	0	5	1	0	0	0	0	0	0	0	0	0	0	0	0	0	4	3	0	0	0	0	0	2	1	0	2	0	0	0	3	1	1	47	20	18	47	17
36227	0	0	0	1	0	0	0	0	0	0	0	0	0	3	10	0	0	1	5	0	0	0	30	1	0	0	0	0	0	0	0	1	1	0	0	0	0	0	0	0	0	1	2	1	1	2	1	2	2
36354	0	0	0	0	0	0	0	0	0	0	0	1	0	0	0	0	0	0	0	0	5	0	0	0	0	0	0	0	0	24	24	0	0	0	148	100	209	13	5	0	0	7	4	10	2	5	5	4	10
36361	19	17	14	2	0	0	0	16	8	25	3	116	0	8	13	0	0	2	5	0	0	1	490	20	0	0	0	0	0	0	0	0	0	0	0	1	0	1	0	0	0	0	0	0	0	0	0	0	0
36393	0	0	0	0	0	0	0	0	0	0	0	0	0	0	0	1	45	0	0	0	2	69	0	0	0	0	0	0	0	0	0	0	0	0	0	0	0	0	0	0	0	0	0	0	0	0	0	0	0
36394	8	3	1	0	0	0	0	0	0	1	0	0	0	7	31	0	0	0	1	0	0	0	11	0	0	0	0	0	0	5	3	4	1	0	18	42	18	0	0	0	0	0	0	0	6	2	0	3	6
36400	0	0	0	0	0	0	0	0	0	4	5	0	0	0	0	0	0	0	0	0	0	0	0	0	0	0	0	0	0	0	0	28	0	0	5	0	2	0	0	0	0	3	1	8	0	0	0	0	0
36434	0	0	0	0	0	0	0	0	0	0	0	0	0	0	0	0	0	0	0	0	0	0	0	0	64	0	4	48	18	0	0	0	0	0	0	0	0	0	0	0	0	0	0	0	0	0	0	0	0
36458	0	0	0	0	0	41	59	0	0	0	0	0	0	0	0	0	11	0	2	0	0	0	0	0	0	0	0	0	0	0	0	0	0	0	0	0	2	0	0	0	0	0	0	1	16	29	30	22	17
36462	0	0	0	0	2	26	10	2	0	0	0	0	57	0	0	124	402	38	171	20	148	167	746	239	372	120	17	239	383	4	1	3	1	2	16	12	35	4	1	0	0	12	13	14	13	12	29	45	5
36468	0	0	0	0	0	0	0	0	0	0	0	0	0	0	0	0	2	3	1	0	0	0	0	1	14	34	3	0	0	0	0	0	0	0	0	0	0	0	0	0	0	0	0	0	0	0	0	0	0
36479	0	4	1	3	0	0	0	1	0	174	45	4	0	9	54	0	0	5	18	0	0	0	19	0	0	0	0	0	0	0	0	0	4	3	0	0	0	0	0	0	0	0	0	0	8	3	0	5	16
36488	0	0	0	0	0	0	0	0	0	0	0	0	0	0	0	0	0	0	0	0	0	0	0	2	0	0	0	0	0	0	0	0	0	0	0	0	0	0	0	0	0	0	0	0	0	0	0	0	0
36527	0	0	0	0	0	0	0	0	0	0	0	0	0	0	0	0	0	0	0	0	0	0	0	0	63	10	4	10	41	0	0	0	0	0	0	0	0	0	0	0	0	0	0	0	0	0	0	0	0
36550	0	0	0	0	0	0	0	0	0	0	0	0	0	0	0	0	0	0	5	0	0	0	0	1	0	0	0	0	0	0	0	0	0	0	0	0	0	0	0	0	0	0	0	0	0	0	0	0	0
36611	0	0	0	0	0	0	0	0	0	2	3	0	0	0	0	0	0	0	0	0	0	0	0	0	0	0	0	0	0	0	0	0	0	0	0	0	0	0	0	0	0	0	0	0	6	5	14	1	17
36633	0	1	0	0	0	0	0	0	0	0	0	0	0	3	3	1	0	116	102	1	0	0	5	0	0	0	0	0	0	0	1	0	1	0	0	0	0	1	0	0	0	0	0	0	0	0	0	0	0
36640	0	0	0	0	0	0	0	0	0	0	0	0	0	12	1	188	170	214	234	194	41	92	81	112	23	70	2	31	11	0	0	0	0	0	0	0	0	0	0	0	0	0	0	0	0	0	0	0	0
36643	0	0	0	0	0	0	0	0	0	0	0	0	0	0	0	0	0	26	44	4	3	1	0	4	0	1	0	0	0	0	0	0	0	0	0	0	0	0	0	0	0	0	0	0	0	0	0	0	0
36694	13	23	0	1	24	0	0	0	235	0	3	8	115	2	5	0	0	0	0	0	0	0	0	0	0	0	0	0	0	0	0	0	0	0	0	0	0	0	0	0	0	0	0	0	0	0	0	0	0
36790	0	0	0	0	0	0	0	0	0	0	0	0	0	0	0	0	0	0	0	0	0	0	0	0	0	0	0	0	0	0	0	0	0	0	0	0	0	0	0	0	0	0	0	0	0	37	1	5	49
36818	0	0	0	0	0	0	0	0	0	0	0	0	0	0	0	0	0	1	0	1	0	0	0	0	0	0	0	0	0	0	0	0	0	0	0	0	0	0	0	0	0	0	0	0	0	0	0	0	0
36826	0	0	0	0	0	0	0	10	0	0	0	0	0	0	0	0	0	0	0	0	0	0	0	0	5	4	0	2	5	0	0	0	0	0	0	0	0	0	0	0	0	0	0	0	0	0	0	0	0
36847	0	0	0	0	0	0	0	0	0	1	0	0	0	0	0	0	0	0	0	0	0	0	0	0	0	0	0	0	0	0	0	0	11	3	0	0	0	0	0	0	0	1	1	0	8	4	2	10	16
36909	0	0	0	0	0	0	0	0	0	0	0	0	0	0	0	58	0	505	4161	34	333	81	136	227	0	0	0	0	0	0	0	0	0	0	0	0	0	0	0	0	0	0	0	0	0	0	0	0	0
36953	0	0	0	0	0	0	0	0	0	1	2	0	0	0	0	0	0	0	0	0	0	0	0	0	0	0	0	0	0	7	10	2	19	33	28	32	23	0	1	2	0	0	0	0	0	0	0	1	2
36962	0	0	0	0	0	0	0	0	0	0	0	0	0	0	0	0	34	0	0	0	0	0	0	0	0	0	0	0	0	0	0	0	0	0	0	0	0	0	0	0	0	0	0	0	0	0	0	0	0
36976	0	0	0	0	0	0	0	0	0	0	0	0	0	0	2	0	10	0	0	0	1	26	0	0	0	0	0	0	0	0	0	0	0	0	0	0	0	0	0	0	0	0	0	0	0	5	0	0	0
37087	2	6	10	10	23	97	90	44	40	0	0	1	67	9	1	21	0	278	229	49	6	4	39	121	0	0	0	0	0	0	0	0	0	0	0	0	0	0	0	0	0	0	0	0	0	0	0	0	0
37124	0	0	0	0	0	0	0	0	0	0	0	0	0	0	0	46	74	0	0	0	93	347	43	1	31	9	11	57	67	0	0	0	0	0	0	0	0	0	0	0	0	0	0	0	0	0	0	0	0
37145	0	0	0	0	0	0	0	0	0	0	0	0	0	0	0	11	3	1	1	0	3	3	4	3	0	0	0	0	0	0	0	0	0	0	0	0	0	0	0	0	0	0	0	0	0	0	0	0	0
37164	0	0	0	0	0	0	0	0	0	47	303	0	0	0	1	0	0	0	0	0	0	0	1	0	0	0	0	0	0	0	0	0	0	0	0	0	0	0	0	0	0	0	0	0	0	0	0	0	1
37180	0	0	0	0	0	0	0	0	0	0	0	0	0	0	0	0	188	0	0	0	1	5	0	0	0	0	0	1	0	0	0	0	0	0	0	0	0	0	0	0	0	0	0	0	0	0	0	0	0
37205	0	0	0	0	0	0	0	0	0	0	0	0	0	0	0	6	2	0	0	0	15	126	7	1	0	0	0	0	0	0	0	0	0	0	0	0	0	0	0	0	0	0	0	0	0	0	0	0	0
37224	0	0	0	0	0	0	0	0	0	0	0	0	0	0	0	23	0	3	14	2	159	499	20	29	0	0	0	0	0	0	0	0	0	0	0	0	0	0	0	0	0	0	0	0	0	0	0	0	0
37240	73	312	12	1	0	0	0	7	2	0	5	68	0	3	57	0	0	135	665	0	0	0	183	1	0	0	0	0	0	10	113	0	1	0	15	32	45	30	30	0	0	0	0	0	0	1	0	0	0
37269	0	0	0	0	0	0	0	0	0	0	0	0	0	0	0	0	1	85	274	0	111	0	12	42	0	0	0	0	0	0	0	0	0	0	0	0	0	0	0	0	0	0	0	0	3	0	5	12	0
37303	0	0	0	0	0	0	0	0	0	0	0	0	0	0	0	0	0	0	0	0	0	0	0	0	0	0	0	0	0	0	0	0	0	0	0	0	0	0	0	0	0	0	0	0	0	0	0	0	0
37313	0	0	0	0	0	0	0	0	0	20	23	2	0	2	0	0	0	0	0	0	0	0	40	0	0	0	0	0	0	0	0	37	4	2	0	0	0	0	0	0	0	0	0	0	0	0	1	0	0
37317	2	0	0	44	68	22	31	7	47	0	0	0	133	0	0	0	0	0	0	0	0	0	0	0	0	0	0	0	0	0	0	0	0	0	0	0	0	0	0	0	0	0	0	0	0	0	0	0	0
37370	0	0	0	0	0	0	0	0	0	0	0	0	0	0	0	8	3	10	32	3	80	2	4	58	0	0	0	0	0	0	0	0	0	0	0	0	0	0	0	0	0	0	0	0	0	0	0	0	0
37429	0	0	0	0	0	0	0	0	0	0	0	0	0	0	0	0	0	0	0	0	0	0	0	0	0	0	0	0	0	0	0	2	19	5	0	0	0	0	0	0	0	111	45	181	0	0	0	0	0
37444	0	0	0	0	0	0	0	0	0	0	0	0	0	0	0	0	0	0	0	0	0	0	0	0	22	6	4	4	18	0	0	0	0	0	0	0	0	0	0	0	0	0	0	0	0	0	0	0	0
37463	0	0	0	0	0	0	0	0	0	0	0	0	0	0	0	4	0	8	2	8	2	1	1	0	0	0	0	1	1	0	0	0	0	0	0	0	0	0	0	0	0	0	0	0	0	0	0	0	0
37508	0	0	0	0	0	0	0	0	0	0	0	0	0	0	0	0	0	0	2	0	0	15	0	0	12	10	4	13	2	0	0	0	0	0	0	0	0	0	0	0	0	0	0	0	0	0	0	0	0
37553	0	0	0	0	0	0	0	0	0	0	0	0	0	3	0	0	0	29	21	0	0	0	3	0	0	0	0	0	0	4	1	0	1	1	0	0	2	10	0	0	0	0	0	0	0	0	0	0	0
37571	0	0	0	0	0	0	0	0	0	0	0	0	0	0	0	0	0	0	0	26	0	0	0	0	0	0	0	0	0	0	0	0	0	0	0	0	0	0	0	0	0	0	0	0	0	0	0	0	0
37574	0	0	0	0	0	0	0	0	0	0	0	0	0	0	0	0	0	0	0	0	0	0	0	0	0	0	0	0	0	0	0	0	0	0	0	0	0	0	0	0	0	0	0	0	0	0	0	0	0
37578	0	0	0	0	0	0	0	0	0	0	0	0	0	0	1	0	0	0	0	0	0	0	0	0	0	0	0	0	0	24	30	0	8	12	41	34	19	125	29	0	0	1	2	1	4	0	2	0	3
37608	0	0	0	0	0	0	0	0	0	0	0	0	0	0	0	0	18	0	0	0	0	0	0	1	0	0	0	0	0	3	0	10	3	0	14	14	22	0	0	0	0	1	0	1	0	7	5	15	0
37661	0	0	0	0	0	0	0	0	0	0	0	0	0	0	0	0	0	0	0	0	0	0	0	0	0	0	0	0	0	0	0	0	0	0	0	0	0	0	0	0	0	0	0	0	0	0	0	0	0
37674	0	0	0	0	0	0	0	0	0	0	0	0	0	0	0	1	1	0	14	0	5	165	0	0	0	0	0	0	0	0	0	0	0	0	0	0	0	0	0	0	0	0	0	0	0	0	0	0	0
37691	0	0	0	0	0	0	0	0	0	10	0	0	0	0	0	0	0	0	0	0	0	0	0	0	0	0	0	0	0	2	2	0	32	38	0	0	0	5	1	0	0	0	0	0	0	0	0	0	0
37703	0	0	0	0	0	0	0	0	0	0	0	0	0	0	0	1	0	8	11	2	0	0	2	13	2	6	0	2	1	0	0	0	0	0	0	0	0	0	0	0	0	0	0	0	0	0	1	3	0
37712	0	0	0	0	0	0	0	0	0	0	0	0	0	0	0	0	0	0	0	0	0	0	0	0	25	82	2	8	18	0	0	0	0	0	0	0	0	0	0	0	0	0	0	0	0	0	0	0	0
37746	0	0	0	0	0	0	0	0	0	0	0	0	0	0	0	0	0	0	0	0	0	0	0	0	0	0	0	0	0	8	5	0	0	0	6	5	15	31	0	0	0	8	13	8	34	116	35	44	36
37754	0	0	0	0	0	0	0	0	0	0	0	0	1	0	0	0	0	0	2	0	0	0	0	0	0	0	0	0	0	0	0	0	0	0	0	0	0	0	0	0	0	0	0	0	0	0	0	0	0
37768	0	0	0	0	0	0	0	0	0	0	0	0	0	0	0	0	0	0	0	0	0	0	0	0	0	0	0	0	0	0	0	0	0	0	0	0	0	0	0	52	49	0	0	0	0	0	0	0	0
37812	0	0	0	0	0	0	1	1	0	0	0	0	0	0	0	1	0	1	0	1	0	0	0	6	1	5	1	0	0	0	0	0	0	0	0	0	0	8	0	0	0	0	0	0	1	0	0	0	0
37845	23	11	3	0	0	0	0	0	0	0	0	49	0	29	64	0	0	0	0	0	0	0	77	0	0	0	0	0	0	0	0	10	1	43	0	0	0	1	0	0	0	0	0	0	0	3	0	0	10
37884	7	0	0	0	0	0	0	0	0	23	93	1	0	2	8	0	0	6	13	0	0	0	9	0	0	0	0	0	0	0	0	9	0	0	0	0	0	0	0	1	1	16	28	12	0	13	1	0	5
37937	0	0	0	0	0	0	0	0	0	0	0	0	0	0	0	0	0	0	0	0	0	0	0	0	0	0	0	0	0	0	0	2	0	0	0	0	0	0	0	100	82	0	0	0	0	0	0	0	0
37939	0	0	0	0	0	0	0	0	0	0	0	0	0	0	0	0	4	0	0	0	0	0	0	0	0	0	0	0	1	0	0	0	0	0	0	0	0	0	0	0	0	0	0	0	0	0	0	0	0
37968	0	0	0	0	0	0	0	0	0	0	0	0	0	0	0	0	0	2	0	0	0	0	0	0	0	0	0	0	0	0	0	0	0	0	0	0	0	0	0	0	0	0	0	0	0	0	0	0	0
37988	0	0	0	0	0	0	0	0	0	0	0	7	0	1	0	0	0	0	0	0	0	0	0	0	0	0	0	0	0	0	0	0	2	1	3	5	4	0	0	0	0	49	3	105	0	2	0	0	1
38023	0	0	0	0	0	0	0	0	0	0	0	0	0	0	0	0	0	0	0	0	0	0	0	0	0	0	0	0	0	0	0	0	0	0	0	0	0	0	0	0	0	0	0	0	0	0	0	0	0
38060	0	0	0	0	0	0	0	0	0	0	0	0	0	0	0	0	0	0	1	0	0	0	0	0	0	0	0	0	0	0	0	0	0	0	0	0	0	0	0	0	0	0	0	0	0	0	0	0	0
38061	0	0	0	0	0	0	0	0	0	0	0	0	0	0	0	0	0	0	0	0	0	0	0	0	0	0	0	0	0	0	0	0	0	0	0	0	0	0	0	0	0	0	0	0	0	0	0	0	0
38073	0	0	0	0	0	0	0	0	0	0	0	0	0	0	0	0	0	8	1	1	1	6	6	3	0	0	0	0	0	0	0	0	0	0	0	0	0	0	0	0	0	0	0	0	0	0	0	0	0
38088	63	28	5	8	0	0	0	61	4	1	0	0	0	10	2	0	0	3	30	0	0	0	11	22	0	0	0	0	0	0	1	1	0	0	1	0	1	0	0	0	0	0	1	1	5	20	19	2	21
38096	0	0	0	0	0	0	0	0	0	0	0	0	0	0	0	20	3	0	4	0	6	0	0	2	5	3	0	5	3	0	0	0	1	0	0	0	0	0	0	0	0	0	0	0	0	3	1	0	0
38104	0	0	0	0	0	0	0	0	0	26	1	0	0	0	0	0	0	0	0	0	0	0	0	0	0	0	0	0	0	0	0	40	1	0	0	0	0	0	0	0	0	2	0	0	0	0	0	0	0
38130	0	0	0	0	0	0	0	0	0	0	0	0	0	0	0	3	0	9	0	0	0	0	1	0	6	5	0	0	0	0	0	0	0	0	0	0	0	0	0	0	0	0	0	0	2	0	0	0	0
38167	0	0	0	0	0	0	0	0	0	0	0	0	0	0	0	0	0	0	0	0	0	0	0	0	0	0	0	0	0	0	0	0	0	0	0	0	0	0	0	0	0	0	0	0	0	0	0	0	0
38170	0	0	0	0	0	0	1	0	1	0	0	0	0	1	0	0	0	2	166	0	6	17	3	10	14	0	2	3	4	0	0	0	1	0	0	1	0	0	0	0	0	0	0	0	7	3	4	0	0
38211	233	4	0	19	0	0	0	7	0	6	12	112	0	161	78	0	0	3	1	0	0	0	30	5	0	0	0	0	0	1	5	0	114	116	72	20	91	23	1	13	15	0	0	0	34	31	36	20	65
38219	0	0	0	0	0	0	0	0	0	0	0	0	0	0	0	0	0	0	4	0	0	24	0	0	0	0	0	0	0	0	0	0	0	0	0	0	0	0	0	0	0	0	0	0	2	0	1	0	0
38221	0	1	0	5	55	6	24	9	2	0	0	2	26	0	0	0	0	0	0	0	0	0	0	0	0	0	0	0	0	0	0	0	0	0	0	0	0	0	0	0	0	0	0	0	0	0	0	0	0
38257	0	0	0	0	0	0	0	0	0	0	0	0	0	1	0	0	0	83	151	0	0	32	11	66	0	3	11	0	12	0	0	0	0	0	0	0	0	0	2	0	0	0	0	0	3	3	0	1	4
38275	0	0	0	0	0	0	0	2	0	0	0	0	0	0	0	0	0	1	0	0	2	18	1	1	4	3	2	1	3	0	0	0	0	0	0	0	0	0	0	0	0	0	0	0	0	0	0	0	0
38277	1	1	0	12	0	0	1	0	0	0	0	0	0	0	0	0	0	0	0	0	0	10	0	3	0	0	0	4	1	1	0	0	0	0	0	0	1	1	0	0	0	3	0	3	8	0	3	5	4
38296	0	0	0	1	0	0	0	0	0	9	10	1	0	0	2	0	0	0	1	0	0	0	3	0	0	0	0	0	0	3	2	95	30	45	0	2	0	0	0	0	1	4	8	4	0	0	0	0	0
38344	0	0	0	0	0	0	0	0	0	0	0	0	0	0	0	0	0	4	46	0	0	0	2	0	0	0	0	0	0	0	0	0	0	0	0	0	0	0	0	0	0	0	0	0	0	0	0	0	0
38408	0	0	0	0	0	0	0	0	0	0	0	0	0	0	0	2	0	4	57	8	11	158	20	0	0	0	0	0	0	0	0	0	0	0	0	0	0	0	0	0	0	0	0	0	0	0	0	0	0
38468	0	0	0	0	0	0	0	0	0	0	0	0	0	0	0	0	0	0	0	0	0	0	0	0	0	0	0	0	0	0	0	0	0	0	0	0	0	0	0	0	0	0	0	0	0	0	0	0	0
38480	0	0	0	0	0	0	0	0	0	0	0	0	0	0	0	0	0	0	1	0	0	0	0	0	0	0	0	0	1	0	0	0	0	0	0	0	0	0	0	0	0	0	0	0	5	0	5	5	0
38488	0	0	0	0	0	0	0	0	0	0	0	0	0	0	0	0	0	0	0	0	0	0	0	0	0	0	0	0	0	0	0	0	0	0	0	0	0	0	0	0	0	0	0	0	0	0	0	0	0
38491	0	0	0	0	0	0	0	0	0	1	0	0	0	0	0	0	0	0	0	0	0	0	0	0	0	0	0	0	0	0	0	0	0	0	0	0	0	0	0	0	0	33	8	30	0	0	0	0	0
38519	0	0	0	9	2	25	7	0	1	0	0	0	6	2	0	0	0	0	0	0	0	0	0	0	0	0	0	0	0	0	0	0	0	0	0	0	0	0	0	0	0	0	0	0	0	0	0	0	0
38524	0	0	0	0	0	0	0	0	0	0	0	0	0	0	0	1	0	0	9	0	0	0	4	0	0	0	0	0	0	0	0	0	0	0	0	0	0	0	0	0	0	0	0	0	1	1	0	2	0
38557	32	10	24	0	0	0	0	0	0	85	124	7	0	257	85	0	0	11	67	1	0	0	39	0	0	0	0	0	0	10	33	111	9	16	8	8	3	12	14	54	23	27	42	51	7	4	9	1	14
38572	0	0	0	0	0	0	0	0	0	0	0	0	0	0	0	0	3	0	0	0	0	0	15	0	0	0	0	0	0	0	0	0	0	0	0	0	0	0	0	0	0	0	0	0	0	0	0	0	0
38590	0	0	0	0	0	0	0	0	0	0	0	0	0	0	0	0	1	0	0	0	146	0	0	0	9	3	1	48	89	0	0	0	0	0	0	0	0	0	0	0	0	0	0	0	1	0	1	1	0
38596	9	8	1	0	12	334	138	46	42	0	0	5	0	0	0	0	0	0	0	0	0	0	0	0	0	0	0	0	0	0	0	0	0	0	0	0	0	0	0	0	0	0	0	0	0	0	0	0	0
38635	5	61	3	26	10	194	49	20	7	0	0	3	0	10	3	0	0	0	0	0	0	0	0	0	0	0	0	0	0	0	0	0	0	0	0	0	0	0	0	0	0	0	0	0	0	0	0	0	0
38646	0	0	0	0	0	0	0	0	0	0	0	0	0	0	0	0	4	0	0	0	0	14	2	0	0	1	1	2	0	0	0	0	0	0	0	0	0	0	0	0	0	1	0	0	0	0	0	0	1
38657	0	0	0	0	0	0	0	0	0	0	0	0	0	0	0	0	0	0	0	0	0	0	0	0	0	0	0	0	3	0	0	0	0	0	0	0	0	0	0	0	0	0	0	0	0	0	0	0	0
38664	0	0	0	0	0	0	0	0	0	0	0	0	0	0	0	0	225	0	0	0	0	0	0	0	0	0	0	0	0	0	0	0	0	0	0	0	0	0	0	0	0	0	0	0	0	0	0	0	0
38758	0	0	0	0	0	0	0	0	0	0	0	0	0	0	0	0	0	0	0	0	0	0	0	0	0	0	0	0	0	0	0	0	0	0	0	0	0	0	0	0	0	0	0	0	0	0	0	0	0
38772	0	0	0	0	0	0	0	0	0	0	0	0	0	1	0	0	0	0	0	0	0	0	1	0	0	0	0	0	0	0	0	0	0	0	0	0	0	0	0	0	0	2	0	0	45	11	28	18	23
38815	1	1	0	0	0	0	0	0	0	2	1	0	0	0	8	0	0	0	0	0	0	0	1	0	0	0	0	0	0	7	2	6	3	21	28	8	11	6	3	0	0	0	3	1	0	0	0	1	0
38821	0	0	0	0	0	0	0	0	0	0	0	0	0	0	0	0	1	0	4	2	1	0	0	1	0	25	0	5	42	0	0	0	0	0	0	0	0	0	0	0	0	0	0	0	0	0	0	0	0
38854	8	11	5	3	0	0	0	1	0	1	0	2	0	2	0	0	0	0	9	0	0	0	1	0	0	0	0	0	0	1	3	0	5	2	8	3	4	2	0	0	0	4	5	1	3	1	3	0	4
38870	0	0	0	0	0	12	49	0	0	0	0	0	0	0	0	0	2	0	0	0	0	0	0	1	0	0	0	0	6	0	0	0	0	0	0	0	0	0	0	0	0	0	0	0	0	0	0	0	0
38908	0	0	0	0	0	0	0	0	0	221	228	2	0	1	4	0	0	3	4	0	0	0	32	0	0	0	0	0	0	0	0	80	8	11	0	1	0	0	0	0	0	0	0	1	0	0	0	0	1
38937	0	0	0	1	60	1	16	4	10	0	0	0	0	0	0	0	0	0	0	0	0	0	0	0	0	0	0	0	0	0	0	0	0	0	0	0	0	0	0	0	0	0	0	0	0	0	0	0	0
38981	96	4	1	114	0	0	0	1	0	2	2	13	0	19	19	0	0	0	9	0	0	0	30	1	0	0	0	0	0	1	15	2	2	1	1	4	6	0	0	0	0	3	18	3	2	0	0	0	1
39000	0	0	0	0	0	0	0	0	0	4	5	0	0	0	0	0	0	0	0	0	0	0	0	0	0	0	0	0	0	1	0	2	2	5	4	3	4	13	8	0	0	0	0	0	0	0	0	0	0
39030	0	0	0	8	1	0	16	28	13	0	0	0	10	0	0	0	0	0	0	0	0	0	0	0	0	0	0	0	0	0	0	0	0	0	0	0	0	0	0	0	0	0	0	0	0	0	0	0	0
39076	0	0	0	0	0	0	0	0	0	0	3	0	0	0	0	0	0	0	6	0	0	0	79	0	0	0	0	0	0	0	0	0	1	0	0	0	0	0	0	0	0	0	0	0	0	0	0	0	0
39113	0	0	0	0	0	0	0	0	0	0	0	0	0	0	0	23	11	0	0	0	0	0	1	0	0	0	0	0	0	0	0	0	0	1	0	0	0	11	0	0	0	0	0	0	0	0	0	1	0
39115	0	0	0	0	0	0	0	0	0	0	0	0	0	0	0	0	0	0	26	0	0	0	0	0	0	0	0	0	0	0	0	0	0	0	0	0	0	0	0	0	0	0	0	0	0	0	0	0	0
39158	0	0	0	0	0	0	0	0	0	0	0	0	0	0	0	0	0	0	0	0	0	0	0	0	21	38	1	10	63	0	0	0	0	0	0	0	0	0	0	0	0	0	0	0	0	0	0	0	0
39162	0	0	0	0	0	0	0	13	0	0	0	0	3	0	0	0	0	0	0	0	0	0	0	0	0	0	0	0	1	0	0	0	0	0	1	2	2	0	0	0	0	1	3	2	2	9	4	2	0
39178	0	0	0	0	0	0	0	0	0	31	19	0	0	0	0	0	0	0	0	0	0	0	0	0	0	0	0	0	0	0	0	0	0	0	0	0	0	0	0	0	0	0	0	0	0	0	0	0	0
39183	0	0	0	0	0	0	0	0	0	0	0	0	0	0	0	0	0	0	0	0	0	0	0	0	0	0	0	0	0	0	0	0	0	0	0	0	0	0	0	0	0	15	32	27	0	3	6	3	0
39195	0	0	0	0	0	0	0	0	0	0	0	0	0	0	0	0	0	0	0	0	0	0	0	0	0	3	0	2	1	0	0	0	0	0	0	0	0	0	0	0	0	0	0	0	0	0	0	0	0
39197	0	0	0	0	0	0	0	0	0	0	0	0	0	0	0	0	0	35	4	0	5	1	4	10	0	0	0	0	0	0	0	0	0	0	0	0	0	0	0	0	0	0	0	0	0	0	0	0	0
39200	0	0	0	0	0	0	0	0	0	0	0	0	0	0	0	0	4	0	0	0	0	0	17	0	139	82	66	43	36	0	0	0	0	0	0	0	0	0	0	0	0	0	0	0	0	0	0	0	0
39240	0	0	0	0	0	0	0	0	0	0	0	0	0	0	0	0	56	0	2	0	0	0	0	3	0	0	0	0	0	0	0	0	0	0	0	0	0	0	0	0	0	0	0	0	0	0	0	0	0
39263	0	0	0	0	0	0	0	0	0	60	29	0	0	0	0	0	0	0	0	0	0	0	1	0	0	0	0	0	0	0	0	9	0	0	0	0	0	0	0	0	0	0	0	0	0	0	0	0	0
39404	0	0	0	0	0	0	0	0	0	0	0	0	0	0	2	17	19	0	19	0	8	363	8	4	55	5	10	65	7	0	0	0	0	0	0	0	0	0	0	0	0	0	2	0	37	4	50	30	0
39416	1	3	0	0	0	0	0	5	47	0	0	5	0	0	0	0	0	4	0	0	0	0	0	1	0	0	0	0	0	0	0	0	0	0	0	0	0	0	2	0	0	0	0	0	0	0	0	0	0
39419	1	0	1	0	0	0	0	0	0	0	0	6	0	2	0	0	0	0	0	0	0	0	0	0	0	0	0	0	0	3	2	0	0	2	0	1	1	11	60	0	0	1	1	1	0	0	0	0	0
39435	35	5	10	7	0	0	0	0	0	17	6	2	0	0	1	0	0	0	0	0	0	0	0	0	0	0	0	0	0	19	22	26	188	175	134	61	64	0	0	0	0	5	15	2	15	11	4	12	27
39437	0	0	0	0	0	0	0	0	0	1	0	0	0	0	0	0	0	0	0	0	0	0	0	0	0	0	0	0	0	0	0	0	6	10	0	0	0	0	0	0	0	58	100	126	1	0	3	0	0
39509	0	0	0	1	0	33	30	0	0	0	0	0	0	0	0	1	93	1	0	0	1	0	0	1	0	0	0	3	3	0	0	0	0	0	0	0	0	0	0	0	0	0	0	0	0	0	0	0	0
39560	0	0	0	2	4	23	10	2	1	0	0	0	0	0	0	6	18	0	14	0	15	433	1	1	11	2	5	13	2	0	0	0	0	0	0	0	0	0	0	0	0	0	0	0	7	0	5	7	0
39569	0	0	0	0	0	1	1	1	0	0	0	0	0	0	0	2	0	12	1	0	1	7	11	25	0	0	0	0	0	0	0	0	0	0	0	0	0	0	0	0	0	0	0	0	0	0	0	0	0
39637	0	0	0	0	0	0	0	0	0	20	19	0	0	0	0	0	0	0	0	0	0	0	0	0	0	0	0	0	0	0	0	3	0	0	0	0	0	0	0	0	31	0	0	0	0	0	0	0	0
39649	0	0	0	0	0	0	0	0	0	0	0	0	0	0	0	1	5	4	29	2	0	0	1	4	9	6	2	4	0	0	0	0	0	0	0	0	0	0	0	0	0	0	0	0	0	0	0	0	0
39676	0	0	0	0	0	0	0	0	0	0	0	0	0	0	0	0	0	0	2	2	0	0	2	1	0	0	0	4	4	0	0	0	0	0	0	0	0	0	0	0	0	0	0	0	5	0	4	3	0
39690	0	0	0	0	0	0	0	0	0	0	0	0	0	0	0	0	0	0	0	0	0	0	0	0	0	0	0	0	0	0	0	0	0	0	0	0	0	0	0	0	0	0	0	0	0	0	0	0	0
39695	5	2	3	0	0	0	0	1	0	1	2	13	0	0	0	0	0	1	19	0	0	0	20	2	0	0	0	0	0	9	38	1	15	24	5	12	4	20	44	0	0	0	0	0	0	0	0	0	0
39718	0	0	0	3	0	0	0	0	0	0	0	0	1	0	0	1	16	0	0	4	153	130	0	5	11	11	0	15	4	0	0	0	0	0	0	0	0	0	0	0	0	0	0	0	2	0	0	0	0
39729	0	0	0	0	0	0	0	0	0	0	0	0	0	0	0	1	4	0	52	1	9	12	1	6	7	9	0	0	3	0	0	0	0	0	0	0	0	0	0	0	0	0	0	0	0	0	0	0	0
39750	0	0	0	0	0	0	0	0	0	0	0	0	0	0	0	0	51	3	1	0	32	0	1	0	0	0	0	0	0	0	0	0	0	0	0	0	0	0	0	0	0	7	6	5	0	0	0	1	0
39770	0	0	0	0	0	0	0	0	0	0	0	0	0	0	0	0	0	0	0	0	0	0	0	0	30	54	13	36	98	0	0	0	0	0	0	0	0	0	0	0	0	0	0	0	0	0	1	5	0
39834	0	0	0	0	0	0	0	0	0	0	0	0	0	0	0	0	0	0	0	0	0	0	0	0	0	0	0	0	0	0	0	0	0	0	0	0	0	0	0	0	0	0	0	0	0	0	0	0	0
39849	24	5	20	4	0	0	0	1	0	32	2	1	0	9	16	0	0	5	2	0	0	0	7	0	0	0	0	0	0	10	5	0	14	26	63	43	21	0	27	0	0	5	4	1	12	13	4	1	11
39855	0	1	0	0	0	0	0	0	0	0	0	8	0	1	2	0	0	3	0	0	0	0	17	0	0	0	0	0	0	42	35	3	7	2	25	10	19	77	18	0	0	0	0	0	0	0	0	0	5
39916	4	0	2	0	0	0	0	0	0	40	56	5	0	2	2	0	0	8	4	0	0	0	18	0	0	0	0	0	0	1	0	49	6	9	0	0	0	1	0	0	0	8	3	2	0	0	0	0	0
39934	0	0	0	0	0	0	0	0	0	0	0	0	0	0	0	0	5	0	0	0	0	0	7	2	0	0	0	0	0	0	0	0	0	2	0	0	0	0	0	0	0	0	0	0	0	0	0	0	0
40017	0	0	0	0	0	0	0	0	0	0	0	0	0	0	0	0	0	3	0	0	0	0	1	2	5	0	0	19	10	0	0	0	0	0	0	0	0	0	0	0	0	0	0	0	0	0	1	0	0
40051	0	0	0	0	0	0	0	0	0	0	0	0	0	0	0	0	0	0	0	0	0	0	0	0	0	0	0	0	0	0	0	0	0	0	0	0	0	0	0	0	0	0	0	0	0	0	0	0	0
40084	0	0	0	0	0	0	0	0	0	0	0	0	0	0	0	0	0	17	28	5	1	0	0	0	0	0	0	0	0	0	0	0	0	0	0	0	0	0	0	0	0	0	0	0	0	0	0	0	0
40092	143	7	19	0	1	0	0	0	0	13	2	119	0	11	209	0	0	0	0	0	0	0	24	0	0	0	0	0	0	67	61	0	0	3	25	22	5	185	78	0	0	0	0	0	0	0	0	0	0
40106	0	0	0	0	0	0	0	0	0	0	0	0	0	0	0	0	2	0	0	0	0	1	0	0	0	0	0	0	0	0	0	0	0	0	0	0	0	0	0	0	0	0	0	0	2	3	3	6	4
40115	0	4	0	3	0	37	40	1	1	0	0	0	57	5	3	0	0	0	0	0	0	0	0	0	0	0	0	0	0	0	0	0	0	0	0	0	0	0	0	0	0	0	0	0	0	0	0	0	0
40144	93	0	0	0	0	0	0	0	0	0	0	0	0	0	0	0	0	0	0	0	0	0	1	0	0	0	0	0	0	0	0	1	0	1	0	0	0	0	0	3	8	0	0	0	0	0	0	0	1
40162	0	1	0	1	0	37	9	5	4	0	0	0	2	0	0	2	0	0	0	0	8	0	2	0	3	2	0	7	11	0	0	0	0	0	0	0	0	0	0	0	0	0	0	0	0	0	0	0	0
40165	63	0	0	0	0	0	0	2	0	0	0	0	0	5	0	0	0	1	6	0	0	0	1	0	0	0	0	0	0	0	0	1	0	0	0	0	0	1	0	0	0	1	0	0	0	0	0	0	0
40178	0	0	0	0	0	0	0	0	0	0	0	0	0	0	0	0	0	0	0	0	0	0	0	0	0	0	0	0	0	0	0	0	0	0	0	0	0	0	0	0	0	3	6	2	1	1	13	14	0
40206	0	0	0	0	0	4	4	0	0	0	0	0	0	0	2	0	5	0	0	0	0	0	0	0	0	0	0	0	39	0	0	0	0	0	0	0	0	0	0	0	0	0	0	0	0	0	0	0	0
40240	30	26	2	76	9	1	0	5	2	1	1	3	74	13	0	495	10	15	1524	505	0	0	0	0	0	4	0	0	0	0	0	2	3	13	53	17	97	0	0	84	66	22	13	15	13	40	27	18	29
40254	0	0	0	0	0	0	0	0	0	0	49	0	0	0	0	0	0	0	0	0	0	0	0	0	0	0	0	0	0	0	0	1	0	0	0	0	0	0	0	0	0	0	0	0	0	0	0	0	0
40280	0	0	0	0	0	0	0	0	0	0	0	0	0	0	0	0	46	0	0	0	0	0	0	0	0	0	0	0	0	0	0	0	0	0	0	0	0	0	0	0	0	0	0	0	0	0	0	0	0
40314	0	0	0	1	0	0	6	0	0	0	0	0	10	3	0	0	3	23	1	0	0	5	0	10	3	94	5	17	0	0	0	0	0	0	0	0	0	0	0	0	0	0	0	0	12	1	9	14	0
40330	0	0	0	0	0	0	0	0	0	0	0	0	0	0	0	0	0	0	0	0	0	0	0	0	43	24	35	78	38	0	0	0	0	0	0	0	0	0	0	0	0	0	0	0	0	0	0	0	0
40350	0	0	0	0	0	0	0	0	0	0	0	0	0	0	0	5	0	0	0	0	277	206	12	21	3	17	1	30	15	0	0	0	0	0	0	0	0	0	0	0	0	0	0	0	0	0	0	0	0
40351	0	0	0	0	0	0	0	0	0	0	0	0	0	0	0	39	11	3	17	0	142	1418	3	45	1	0	2	0	0	0	0	0	0	0	0	0	0	0	0	0	0	0	0	0	0	0	0	0	0
40360	0	0	1	0	4	0	0	0	0	0	0	0	43	6	2	0	0	0	0	0	0	0	0	0	0	0	0	0	0	0	0	0	0	0	0	0	0	0	0	0	0	0	0	0	0	0	0	0	0
40374	0	3	2	3	0	0	0	1	0	1	0	0	0	54	0	0	1	7	2	0	0	0	0	0	0	0	0	0	0	0	0	0	0	0	1	2	2	3	1	1	1	11	6	5	0	5	1	0	1
40504	0	0	0	0	0	0	0	0	0	0	0	0	0	0	0	3	0	35	54	1	13	2	0	0	0	0	0	0	0	0	0	0	0	0	0	0	0	0	0	0	0	0	0	0	0	0	0	0	0
40548	0	0	0	0	0	0	0	0	0	46	8	0	0	0	0	0	0	0	0	0	0	0	0	0	0	0	0	0	0	0	0	5	1	0	0	0	0	0	0	0	0	0	1	0	0	0	0	0	0
40554	0	0	0	0	0	0	0	0	0	0	0	0	0	0	0	0	3	68	0	0	61	862	9	32	91	7	0	14	1	0	0	0	0	0	0	2	1	0	1	0	0	0	0	0	0	0	0	0	0
40636	0	0	0	0	0	0	0	0	0	0	0	0	0	0	0	0	2	0	1	0	44	14	216	3	2	0	0	2	0	0	0	0	0	0	0	0	0	0	0	0	0	0	0	0	0	0	0	0	0
40686	0	0	0	0	0	0	0	0	0	0	0	0	0	1	0	0	0	0	3	0	0	0	0	0	0	0	0	0	0	0	0	0	0	0	0	0	0	0	0	0	0	0	0	0	0	0	0	0	0
40699	0	0	0	0	5	2	0	0	2	0	0	0	23	0	0	3	0	27	1	0	0	10	7	0	0	0	0	0	0	0	0	0	0	0	0	0	0	0	0	0	0	0	0	0	0	0	0	0	1
40755	0	0	3	4	1	0	0	0	0	0	0	0	0	0	0	46	0	0	0	0	0	0	21	0	0	0	0	0	0	3	2	0	0	0	0	0	0	0	1	0	0	0	0	0	6	25	9	6	19
40758	0	0	0	2	0	0	0	7	0	0	0	0	49	0	0	2	3	33	82	0	1	35	8	26	6	2	0	4	7	0	0	0	0	0	3	2	5	0	0	0	0	0	1	2	1	15	1	1	14
40774	0	0	0	0	0	0	0	0	0	0	0	0	0	0	0	0	28	5	0	0	0	80	2	3	34	18	3	50	20	0	0	0	0	0	0	0	0	0	0	0	0	0	0	0	0	0	0	0	0
40831	0	0	0	0	0	0	0	0	0	0	0	0	0	0	0	3	6	0	0	0	15	71	5	6	1	0	147	66	1	11	12	1	1	1	33	48	40	92	9	1	0	4	0	4	270	52	88	517	155
40850	0	1	1	0	0	3	2	0	0	0	0	0	1	0	1	0	0	0	1	0	0	0	1	0	0	1	0	0	0	3	3	0	0	0	0	1	0	0	0	0	0	0	0	0	1	1	0	0	0
40906	0	0	0	0	0	0	0	0	0	343	390	246	0	14	9	0	0	0	0	0	0	0	221	0	0	0	0	0	0	0	0	0	2	0	0	0	0	0	0	0	0	6	2	1	9	4	6	1	23
40917	1	0	0	17	63	64	28	8	17	0	0	0	74	0	0	0	0	0	0	0	0	0	0	0	0	0	0	0	0	0	0	0	0	0	0	0	0	0	0	0	0	0	0	0	0	0	0	0	0
40950	0	0	0	0	0	0	0	0	0	8	6	2	0	0	0	0	0	0	0	0	0	0	6	0	0	0	0	0	0	1	0	24	14	18	2	0	1	0	0	5	3	9	8	4	0	0	0	0	0
40966	0	0	0	0	0	0	0	0	0	0	0	0	0	0	0	0	0	2	1	2	0	0	0	0	0	0	0	0	0	0	0	0	0	0	0	0	0	0	0	0	0	0	0	0	0	0	0	0	0
41004	0	0	0	1	0	2	23	2	1	0	0	0	4	0	0	0	0	0	0	0	0	0	0	0	0	0	0	0	0	0	0	0	1	0	10	14	22	0	0	0	0	0	0	0	0	0	0	0	0
41023	0	0	0	0	0	0	0	0	0	0	0	0	0	0	0	0	0	0	0	0	0	0	0	0	0	0	0	0	0	0	0	0	0	0	0	0	0	0	0	0	0	0	2	1	1	17	1	0	5
41027	0	0	0	0	0	0	0	0	0	0	0	0	0	0	0	0	107	0	0	0	0	0	0	0	0	0	0	0	0	0	0	0	0	0	0	0	0	0	1	0	0	0	0	0	0	0	0	0	0
41042	0	0	0	0	0	0	0	0	0	0	0	0	0	0	0	0	0	0	0	0	0	0	0	0	0	0	0	0	0	0	0	0	0	0	0	0	0	0	0	0	0	0	0	0	0	0	0	0	0
41077	1	0	0	3	11	10	15	3	29	0	0	2	112	3	2	0	0	0	0	0	0	0	0	0	0	0	0	0	0	4	3	2	3	1	1	0	6	3	0	0	0	13	13	11	6	1	2	3	2
41085	0	0	0	0	0	0	2	10	5	0	0	0	0	0	0	9	6	0	0	0	0	15	0	0	0	0	0	0	0	0	0	0	0	0	0	0	0	0	0	0	0	0	0	1	1	1	3	1	0
41097	0	2	0	68	101	181	590	222	374	2	0	1	163	2	0	45	697	0	32	8	450	365	45	38	99	39	6	72	167	1	1	0	3	2	4	1	10	9	1	0	0	34	36	33	117	178	162	237	90
41109	2	10	1	217	0	0	0	91	5	1	0	0	2	135	1	188	198	1008	378	1	4	0	154	3516	0	35	0	2	0	1	0	0	0	0	0	0	0	1	0	2	3	0	0	1	5	5	0	3	14
41136	0	0	0	0	0	0	0	0	0	0	0	0	0	0	0	0	0	0	0	0	0	27	0	0	1	0	0	0	2	0	0	0	0	0	0	0	0	0	0	0	0	0	0	0	0	0	0	0	0
41147	0	0	0	0	0	0	0	0	0	0	0	0	0	0	0	0	7	0	0	0	0	0	0	0	0	0	0	0	0	0	0	0	0	0	0	0	0	0	0	0	0	0	0	0	0	0	0	0	0
41179	0	0	0	0	0	0	0	0	0	0	0	0	0	0	0	0	0	0	0	0	0	0	0	0	0	0	0	0	0	0	0	0	0	0	0	0	0	0	0	0	0	0	0	0	0	0	0	0	0
41188	0	0	0	0	0	0	0	0	0	0	0	0	0	0	0	3	0	0	2	0	7	296	1	2	0	0	0	0	0	0	0	0	0	0	0	0	0	0	0	0	0	0	0	0	0	0	0	0	0
41274	0	2	0	210	0	65	468	0	0	0	0	0	0	0	5	0	0	58	16	0	0	0	0	0	0	0	0	0	0	0	0	0	0	0	0	0	0	0	0	0	0	0	0	0	0	0	0	0	1
41324	0	0	0	0	0	0	0	0	0	0	0	0	0	0	0	0	0	0	0	0	0	0	0	0	0	0	0	0	0	0	0	0	0	0	0	0	0	0	0	0	0	0	0	0	0	0	0	0	0
41327	0	0	0	0	0	0	0	0	0	0	0	2	0	0	0	0	0	0	27	0	0	13	8	15	0	0	0	0	0	0	0	1	0	0	0	0	0	1	1	0	0	0	2	1	0	0	0	0	0
41335	0	0	0	0	2	0	0	0	2	0	0	0	1	0	0	30	2	7	66	65	1	19	0	5	2	7	0	2	10	0	0	0	0	0	0	0	0	0	0	0	0	0	0	0	0	3	2	6	0
41344	0	0	0	0	0	0	0	0	0	0	0	0	0	0	0	0	0	0	0	0	41	17	0	1	0	0	0	0	0	0	0	0	0	0	0	0	0	0	0	0	0	0	0	0	0	0	0	0	0
41399	0	0	0	0	0	0	0	0	0	0	0	0	0	0	0	0	17	0	0	0	6	2	0	6	0	1	1	18	0	0	0	0	0	0	0	0	0	0	0	0	0	0	0	0	0	0	0	0	0
41434	0	0	0	0	0	0	0	0	0	0	0	0	0	0	0	0	0	0	0	0	3	48	0	0	0	0	0	0	0	0	0	0	0	0	0	0	0	0	0	0	0	0	0	0	0	0	0	0	0
41463	0	0	0	0	8	6	12	1	0	0	0	0	52	0	0	0	0	0	0	0	0	0	0	0	0	0	0	0	0	0	0	0	0	0	0	0	0	0	0	0	0	0	0	0	0	0	0	0	0
41473	5	0	0	0	0	0	0	0	0	5	5	5	0	3	12	0	0	2	0	0	0	0	35	0	0	0	0	0	0	3	7	9	13	29	6	3	5	74	34	0	0	0	3	0	0	0	0	0	0
41504	0	0	0	0	0	0	0	0	0	0	0	0	0	0	0	0	1	0	0	0	0	0	0	0	0	0	0	0	0	0	0	0	0	0	0	0	0	0	0	0	0	0	0	0	0	0	0	0	0
41546	0	0	0	0	0	0	0	0	0	0	0	0	0	0	0	0	0	0	0	0	0	0	0	0	0	0	0	0	0	0	0	0	0	0	0	0	0	0	0	0	0	19	29	17	0	2	7	2	0
41578	0	0	0	0	0	0	0	0	0	0	0	0	0	0	0	0	0	0	0	0	0	0	0	0	26	28	13	31	38	0	0	0	0	0	0	0	0	0	0	0	0	0	0	0	0	0	0	0	0
41668	0	0	0	0	0	0	0	0	0	1	0	0	0	0	0	0	0	0	0	0	0	0	0	0	0	0	0	0	0	0	0	0	0	0	0	0	0	0	0	259	209	4	1	1	0	0	0	0	0
41670	0	0	0	0	0	0	0	0	0	0	0	0	0	0	0	0	0	0	0	0	0	0	0	0	0	0	0	0	0	0	0	0	0	0	0	0	0	0	0	0	0	18	35	9	0	0	1	2	0
41679	0	0	0	0	0	0	0	0	0	0	0	0	0	0	0	0	0	0	0	0	0	0	0	0	0	0	0	0	0	0	0	0	0	0	0	0	0	0	0	0	0	0	0	0	0	0	0	0	0
41689	0	0	0	0	0	0	0	0	0	0	0	0	0	0	0	0	0	0	0	0	0	0	0	0	0	0	0	0	0	2	1	0	0	2	62	21	43	4	1	0	0	3	3	1	0	0	0	0	0
41748	0	0	0	0	0	0	0	0	0	0	0	0	0	0	0	0	0	0	53	24	0	0	0	0	0	0	0	0	0	0	0	0	0	0	0	0	0	0	0	0	0	0	0	0	0	0	0	0	0
41751	0	0	0	0	0	0	0	0	0	0	0	0	0	0	0	0	0	0	0	0	0	0	0	0	20	9	2	1	30	0	0	0	0	0	0	0	0	0	0	0	0	0	0	0	0	0	0	0	0
41761	0	0	0	0	0	0	0	0	0	0	0	0	0	0	0	3	187	0	0	0	0	3	1	1	7	0	0	0	0	0	0	0	0	0	0	0	0	0	0	0	0	0	0	0	0	0	0	0	0
41765	0	0	0	0	0	0	0	0	0	0	0	0	0	0	0	0	0	0	0	0	0	0	1	1	12	0	1	11	3	0	0	0	0	0	0	0	0	0	0	0	0	0	0	0	0	0	0	0	0
41767	0	0	0	0	0	0	0	0	0	0	0	0	0	0	0	0	0	0	0	0	0	0	0	0	0	0	0	0	0	0	0	0	0	0	0	0	0	0	0	0	0	0	0	0	0	0	0	0	0
41773	0	0	0	0	0	0	0	0	0	0	0	0	0	0	0	27	0	0	7	0	0	6	0	2	2	0	0	0	6	0	0	0	0	0	0	0	0	1	0	0	0	0	0	0	0	0	0	0	0
41823	0	0	0	0	0	0	0	0	0	0	0	0	0	0	0	0	0	0	0	0	1	0	0	1	0	0	0	0	0	0	0	0	0	0	0	0	0	0	0	0	0	0	0	0	0	0	0	0	0
41828	0	0	0	0	6	7	19	7	13	0	0	0	149	2	0	64	6	658	6823	641	658	570	113	513	351	1692	4	169	2095	0	0	1	0	0	27	25	58	0	0	0	0	0	1	0	42	6	71	42	1
41841	0	0	0	0	0	0	0	0	0	1	8	3	0	8	6	0	0	0	1	0	0	0	101	0	0	0	0	0	0	0	0	2	2	14	1	0	0	0	0	0	0	0	0	0	0	0	0	0	0
41869	0	0	0	0	0	0	0	0	0	0	0	0	0	0	0	0	0	0	0	0	0	1	0	1	10	23	268	128	299	0	0	0	0	0	0	0	0	0	5	0	0	0	0	0	0	0	0	0	0
41914	0	0	0	0	0	0	0	0	0	5	0	0	0	0	0	0	0	0	0	0	0	0	99	0	0	0	0	0	0	0	0	0	0	1	0	0	0	0	0	0	0	0	0	0	0	0	0	0	0
41957	0	0	0	0	0	0	0	0	0	0	0	0	0	0	0	7	0	0	9	0	0	15	0	4	0	0	0	0	0	0	0	0	0	0	0	0	0	0	0	0	0	0	0	0	0	0	0	0	0
42055	0	0	1	0	217	4	24	38	8	0	0	0	0	0	1	5	26	4	0	0	8	49	23	175	77	0	18	86	52	0	0	0	0	0	2	3	1	0	1	0	0	1	8	3	1	0	4	0	0
42092	16	1	0	0	0	0	0	11	0	0	0	0	0	12	0	0	0	0	31	0	0	0	0	0	0	0	0	0	0	0	0	0	0	0	3	0	1	0	0	0	0	1	0	0	0	0	0	0	0
42093	0	0	0	2	0	0	0	1	0	0	4	4	0	52	31	0	0	0	0	0	0	0	245	1	0	0	0	0	0	0	0	0	0	0	0	0	0	0	0	0	0	0	0	0	79	57	34	30	98
42101	0	0	0	5	0	0	0	0	0	0	0	0	0	0	0	0	1	0	0	0	0	0	0	0	0	0	0	0	0	0	0	0	0	0	0	0	0	0	0	0	0	0	0	0	0	0	0	0	0
42177	0	0	0	0	0	0	0	0	0	0	0	0	0	0	0	5	3	0	0	1	0	0	127	30	0	2	0	1	0	0	0	0	0	0	0	0	0	0	0	0	0	0	0	0	0	0	0	0	0
42210	0	0	0	0	0	0	0	0	0	0	0	0	2	0	0	0	0	0	17	0	0	0	10	33	0	0	0	0	0	0	0	0	0	0	0	0	0	0	0	0	0	0	0	0	0	0	0	0	0
42225	0	0	0	0	0	0	0	0	0	0	0	0	0	0	0	11	0	2	33	36	5	0	0	1	0	0	0	0	0	0	0	0	0	0	0	0	0	0	0	0	0	0	0	0	0	0	0	0	0
42258	0	0	0	0	0	0	0	0	0	0	0	0	0	0	0	0	0	0	0	0	0	0	0	0	0	0	0	0	0	0	0	0	0	0	0	0	0	0	0	196	686	0	0	0	0	0	0	0	0
42266	0	0	0	0	0	0	0	0	0	0	0	0	0	0	0	0	0	0	0	0	0	0	0	0	66	8	22	20	24	0	0	0	0	0	0	0	0	0	0	0	0	0	0	0	0	0	0	0	0
42267	0	0	0	0	0	0	0	0	0	0	0	0	0	0	0	14	61	18	0	0	0	0	2	41	0	0	0	0	0	0	0	0	0	0	0	0	0	0	0	0	0	0	0	0	0	0	0	0	0
42275	16	36	9	0	0	0	0	25	3	637	312	11	0	5	281	0	1	0	0	0	0	0	1	0	0	0	0	0	0	33	84	1656	66	148	55	22	12	69	10	5	70	10	0	12	4	0	0	0	13
42319	0	0	0	0	0	25	20	0	0	0	0	0	0	0	0	5	28	0	34	0	4	6	0	0	0	0	0	0	0	0	0	0	0	0	0	0	0	1	0	0	0	0	0	0	1	0	2	2	0
42336	0	0	0	0	0	0	0	0	0	0	0	0	0	0	0	0	1	0	0	0	0	70	0	0	6	1	0	1	7	0	0	0	0	0	0	0	0	0	0	0	0	0	0	0	0	0	0	0	0
42359	0	0	0	0	0	0	0	0	0	0	0	0	0	0	0	3	0	0	0	0	0	0	20	7	0	0	0	0	0	0	0	0	0	0	0	0	0	0	0	0	0	0	0	0	0	0	0	0	0
42389	0	0	0	0	0	0	0	0	0	0	0	0	0	0	0	0	26	1	0	0	2	0	0	0	0	0	0	0	17	0	0	0	0	0	0	0	0	0	0	0	0	0	0	0	0	0	1	0	0
42397	2	2	0	1	11	5	24	21	6	0	0	0	0	0	0	0	0	0	0	0	0	0	0	0	0	0	0	0	0	0	0	0	1	0	1	4	2	8	0	0	0	0	1	0	0	0	0	0	0
42432	0	0	0	0	0	0	0	0	0	0	0	0	0	0	0	0	2	0	0	0	11	117	0	0	0	0	0	0	0	0	0	0	0	0	0	0	0	0	0	0	0	0	0	0	0	0	0	0	0
42436	0	0	0	0	0	0	0	0	0	0	0	0	0	0	0	0	0	81	411	71	0	0	0	0	0	0	0	33	151	0	0	0	0	0	0	0	0	0	0	0	0	0	0	0	0	0	0	0	0
42443	1	0	0	0	0	0	0	0	0	0	0	1	0	0	0	0	0	0	0	0	0	0	0	0	0	0	0	0	0	10	3	0	12	19	3	4	1	0	0	0	0	0	0	0	0	0	0	0	0
42462	0	0	0	4	0	2	6	2	2	0	0	0	4	0	0	0	0	0	129	13	0	0	0	0	103	35	7	64	128	0	0	0	0	0	0	0	0	0	0	0	0	0	0	0	0	0	0	0	0
42530	0	0	1	0	0	0	0	0	1	0	0	54	0	1	0	0	0	0	3	0	0	0	1	3	0	0	0	0	0	0	0	0	1	0	0	0	1	0	0	0	0	1	0	0	4	8	1	6	5
42547	1	0	0	0	0	0	0	0	0	0	0	56	0	13	1	0	0	0	0	0	0	0	10	0	0	0	0	0	0	0	0	0	11	3	0	0	0	0	0	0	0	6	2	1	0	0	0	0	0
42561	0	0	0	0	0	0	0	0	0	0	0	0	0	0	0	0	0	0	0	0	0	0	0	0	0	0	0	0	0	0	0	0	0	0	0	0	0	0	0	368	374	0	0	0	0	0	0	0	0
42565	1	1	1	2	3	2	13	16	7	0	0	0	5	0	0	0	0	0	0	0	0	0	0	0	0	0	0	0	0	0	0	0	0	0	0	0	0	0	0	0	0	0	0	0	0	0	0	0	0
42579	0	0	0	0	0	0	3	0	0	0	0	0	1	0	0	24	0	12	76	3	4	0	0	20	5	30	3	4	14	0	0	0	0	0	0	0	0	0	0	0	0	0	0	0	2	0	0	1	0
42581	0	0	0	0	0	0	0	0	0	0	0	1	0	0	0	0	0	6	0	2	0	0	0	0	0	0	0	0	0	0	0	0	0	0	4	0	8	0	0	0	0	239	456	285	0	1	0	0	0
42639	3	6	0	0	0	0	0	1	0	1	1	3	0	16	1	0	0	1	5	0	0	0	8	1	0	0	0	0	0	0	0	1	2	1	3	3	1	6	1	0	0	0	0	0	2	2	0	4	5
42671	0	0	0	0	2	4	2	0	2	0	0	6	52	0	0	0	0	0	0	0	0	0	0	0	0	0	0	0	0	0	0	0	0	0	0	0	0	0	0	0	0	0	0	0	0	0	0	0	0
42726	0	0	0	14	21	1	2	7	5	0	0	0	17	1	0	0	0	0	0	0	0	0	0	0	0	0	0	0	0	0	0	0	0	0	0	0	0	0	0	0	0	0	0	0	0	0	0	0	0
42764	0	0	0	0	0	0	0	0	0	0	0	0	0	0	0	0	0	0	1	0	0	1	0	0	0	0	0	0	0	0	0	0	0	0	0	0	0	0	0	0	0	0	0	0	0	0	0	0	0
42802	0	0	0	0	0	0	0	0	0	0	0	0	0	0	0	0	0	0	0	0	0	0	0	0	0	0	0	0	0	0	0	0	0	0	0	0	0	0	0	0	0	0	0	0	0	0	0	0	0
42809	0	0	0	0	0	0	0	0	0	0	0	0	0	0	0	0	0	0	0	0	0	0	0	0	0	0	0	0	0	0	0	0	0	0	0	0	0	0	0	0	0	0	0	0	0	0	0	0	0
42822	0	0	0	0	0	0	0	0	0	50	73	0	0	0	0	0	0	0	0	0	0	0	0	0	0	0	0	0	0	0	0	28	0	0	0	0	0	0	0	0	0	0	0	0	0	0	0	0	0
42823	33	80	26	92	0	0	0	59	37	0	0	10	0	47	0	0	0	1718	3421	2	0	0	25	58	0	0	0	0	0	3	3	0	1	0	25	17	6	3	2	0	0	0	0	2	28	97	51	23	107
42880	0	0	3	1	0	0	0	21	10	0	1	4	0	0	0	1	3	0	0	0	10	1	0	0	0	0	0	0	0	0	0	0	0	0	0	0	0	0	0	0	0	0	0	0	3	6	6	5	10
42893	0	0	0	0	0	0	0	0	0	0	0	0	0	0	0	3	1	0	0	0	4	30	0	2	0	0	0	2	0	0	0	0	0	0	0	0	0	0	0	0	0	0	0	0	0	0	0	0	0
42927	1	0	1	0	0	0	0	0	0	14	2	0	0	0	0	0	0	0	0	0	0	0	0	0	0	0	0	0	0	14	28	4	73	72	4	5	2	2	22	0	0	0	0	0	0	0	0	0	0
42970	0	0	0	7	0	0	0	1	0	0	0	0	0	16	0	0	5	90	44	0	0	0	19	391	0	0	0	0	0	0	0	0	0	0	0	0	0	0	0	1	0	0	0	0	6	9	11	1	1
42988	3	8	0	0	0	0	0	0	0	0	1	0	0	67	62	0	0	45	403	0	0	0	32	10	0	0	0	0	0	3	6	1	1	8	1	4	3	243	36	0	0	0	0	0	0	1	2	1	0
42989	0	0	0	0	0	0	0	0	0	0	0	0	0	0	0	2	0	0	0	0	8	0	0	0	0	1	6	1	23	0	0	0	0	0	0	0	0	0	1	0	0	0	0	0	1	0	1	0	0
43006	0	0	0	0	0	0	0	0	0	0	0	0	0	0	0	0	0	0	0	0	0	140	1	0	0	0	0	0	0	0	0	0	0	0	0	0	0	0	0	0	0	0	0	0	0	0	0	0	0
43059	0	0	0	0	0	0	0	0	0	0	0	0	0	0	0	0	0	0	0	0	0	0	0	0	0	0	0	0	0	0	0	0	0	0	0	0	0	0	0	0	0	0	0	0	0	0	0	0	0
43065	1	0	0	7	0	0	0	3	1	1	1	0	0	2	1	0	0	0	3	0	0	0	0	0	0	0	0	0	0	0	0	0	0	0	0	0	0	0	0	0	0	1	3	2	8	4	8	8	7
43102	0	0	0	0	0	0	0	0	0	50	32	0	0	0	0	0	0	0	0	0	0	0	0	0	0	0	0	0	0	0	0	1	0	0	0	0	0	0	0	0	0	0	0	0	0	0	0	0	0
43114	0	0	0	0	1	8	1	0	0	0	0	0	75	0	0	0	0	6	7	0	0	0	4	0	0	0	0	0	0	0	0	0	0	0	0	0	0	0	0	0	0	0	0	0	0	0	0	0	0
43170	0	0	0	0	0	0	0	0	0	0	0	0	0	0	0	0	0	0	0	0	0	0	0	0	39	75	3	17	56	0	0	0	0	0	0	0	0	0	0	0	0	0	0	0	0	0	0	0	0
43187	0	0	0	2	1	1	0	0	0	0	0	4	16	0	0	0	0	0	0	0	0	8	0	0	0	0	0	2	0	0	0	0	1	0	2	3	0	0	0	0	0	0	1	0	3	6	3	5	11
43204	0	0	0	0	0	0	0	0	0	6	11	0	0	0	0	0	0	0	0	0	0	0	0	0	0	0	0	0	0	0	1	263	14	1	0	0	0	2	0	0	0	0	0	0	0	0	0	0	0
43227	0	0	0	0	0	0	0	0	0	3	35	0	0	0	0	0	0	0	2	0	0	0	3	0	0	0	0	0	0	0	0	20	1	1	0	0	0	0	0	0	0	1	0	1	0	1	0	0	2
43230	0	0	0	0	0	0	0	0	0	0	0	0	0	0	0	0	0	2	0	0	0	0	0	0	0	0	0	0	0	0	0	0	0	0	0	1	0	0	0	0	0	0	0	0	0	0	1	0	0
43239	0	0	0	0	0	0	0	0	0	0	0	0	0	0	0	0	1	0	0	0	0	0	0	0	0	0	0	0	0	0	0	0	0	0	0	0	0	0	0	0	0	0	0	0	0	0	0	0	0
43245	0	0	3	0	39	1	1	0	1	0	0	0	5	0	0	0	0	0	0	0	0	0	0	0	0	0	0	0	0	0	0	0	0	0	3	2	8	0	0	0	0	0	0	0	0	0	0	1	0
43252	0	0	0	0	0	0	0	0	0	0	2	0	0	0	2	0	0	0	1	0	0	0	100	0	0	0	0	0	0	0	0	0	0	0	0	0	0	0	0	0	0	0	0	0	0	0	0	0	0
43307	3	1	1	3	0	0	0	0	1	3	0	2	1	48	32	0	0	3	17	0	0	0	178	0	0	0	0	0	0	0	1	1	0	0	0	0	0	0	0	0	0	0	0	1	0	0	1	0	0
43363	0	0	0	1	1	7	9	3	12	0	0	0	6	0	0	0	0	0	0	0	0	0	0	0	0	0	0	3	1	0	0	0	0	0	0	0	1	0	0	0	0	0	0	0	2	1	1	1	1
43370	462	81	689	4	0	0	0	1	0	832	451	712	0	76	301	0	0	2	10	0	0	0	1300	0	0	0	0	0	0	2095	3453	491	3109	2110	1566	1303	1075	1232	1272	63	88	2922	1477	3145	11	8	7	2	23
43397	0	0	0	0	0	0	0	0	0	22	15	0	0	0	0	0	0	0	0	0	0	0	3	0	0	0	0	0	0	0	0	0	2	0	0	0	0	0	0	0	0	311	94	207	0	0	0	0	0
43423	0	0	0	0	0	0	2	0	0	0	0	0	0	0	0	0	5	0	1	2	0	0	0	0	0	0	0	0	1	0	0	0	0	0	0	0	0	0	0	0	0	0	0	0	0	0	0	0	0
43431	0	0	1	12	1	33	17	12	2	0	0	0	13	0	1	0	0	0	0	0	0	0	0	0	0	0	0	0	0	1	0	0	0	0	0	0	1	6	0	0	0	1	3	4	13	43	23	54	42
43443	0	0	0	0	0	0	0	0	0	0	0	0	0	0	0	0	1	0	11	0	0	0	0	7	17	8	0	0	0	0	0	0	0	0	0	0	0	0	0	0	0	0	0	0	0	0	0	0	0
43472	5	4	0	0	36	3	1	3	6	0	0	0	0	0	0	0	0	0	0	0	0	0	0	0	0	0	0	0	0	5	0	0	0	0	1	2	4	0	0	0	0	0	0	0	0	0	0	0	0
43503	0	0	0	0	3	0	0	0	0	0	0	0	9	0	0	0	17	5	36	3	1	10	0	4	0	0	0	0	0	0	0	0	0	0	0	0	1	0	0	0	0	0	0	0	0	0	1	0	0
43524	0	0	0	0	0	0	0	0	0	0	0	0	0	0	0	1	2	0	1	0	1	25	5	3	2	0	0	4	3	0	0	0	0	0	0	0	0	1	0	0	0	0	0	0	0	0	0	0	0
43530	0	0	0	0	0	0	0	0	0	0	0	0	19	0	0	0	0	22	18	0	0	4	20	9	0	2	0	0	10	0	0	0	0	0	0	0	0	0	0	0	0	0	0	0	0	0	0	0	0
43602	1	0	0	0	0	2	0	0	0	0	0	0	5	1	0	0	0	0	0	0	0	0	2	0	9	4	7	22	93	0	1	0	0	0	0	0	0	1	1	0	0	0	0	0	5	1	1	4	0
43619	0	0	0	0	0	0	0	0	0	0	0	0	0	0	0	0	0	0	0	0	0	0	0	3	0	0	0	0	0	0	0	0	0	0	0	0	0	0	0	0	0	0	0	0	0	0	0	0	0
43658	0	0	0	0	0	0	0	0	0	0	0	0	0	0	0	0	0	0	0	0	0	0	0	0	54	167	14	122	209	0	0	0	0	0	0	0	0	0	0	0	0	0	0	0	0	0	0	0	0
43718	0	0	0	0	0	0	0	0	0	0	0	0	0	0	0	0	7	0	0	0	0	0	0	0	0	0	0	0	0	0	0	0	1	0	0	0	0	0	0	0	0	0	0	0	0	0	2	9	0
43753	0	0	0	0	0	0	0	0	0	24	38	0	0	0	0	0	0	0	0	0	0	0	0	0	0	0	0	0	0	0	0	31	9	27	2	0	0	0	0	0	0	0	0	0	0	0	0	0	0
43764	0	0	0	0	0	0	0	0	0	0	0	0	0	0	0	0	0	0	0	0	0	0	0	0	67	20	15	87	16	0	0	0	0	0	0	0	0	0	0	0	0	0	0	0	0	0	0	0	0
43765	0	0	0	0	0	0	0	0	0	0	0	0	0	0	0	0	0	0	0	0	4	205	0	0	0	0	0	0	0	0	0	0	0	0	0	0	0	0	0	0	0	0	0	0	0	0	0	0	0
43767	0	7	1	0	0	0	0	6	16	0	0	50	0	3	1	0	0	0	0	0	0	0	3	14	0	0	0	0	0	0	0	0	0	0	1	1	2	0	1	0	0	0	0	0	2	0	0	1	3
43853	0	0	0	0	0	0	0	0	0	0	0	0	0	0	0	3	0	32	173	2	5	0	34	83	107	17	16	0	0	0	0	0	0	0	0	0	0	0	0	0	0	0	0	0	0	0	0	0	0
43877	0	0	0	0	0	0	0	0	0	0	0	0	0	0	0	0	0	0	0	0	2	271	0	0	0	0	0	0	0	0	0	0	0	0	0	0	0	0	0	0	0	0	0	0	0	0	0	0	0
43886	0	0	0	0	0	0	0	0	0	0	0	0	0	0	0	0	0	0	0	0	0	0	0	0	0	0	0	0	0	0	0	0	0	0	0	0	0	0	0	1673	2276	0	0	0	0	0	0	0	0
43926	0	0	0	0	0	0	0	0	0	0	0	0	0	0	0	0	0	0	0	0	0	0	0	0	0	0	0	0	0	0	0	0	0	0	0	0	0	0	0	12	70	0	0	0	0	0	0	0	0
43980	0	0	0	0	0	0	0	0	0	15	10	0	0	10	0	0	0	0	0	0	0	0	0	0	0	0	0	0	0	0	0	9	6	25	0	0	0	0	0	0	0	0	0	0	0	0	0	0	0
43983	0	0	0	0	0	0	0	0	0	0	0	0	0	0	0	0	0	0	0	0	0	0	0	0	7	0	0	42	11	0	0	0	0	0	0	0	0	0	0	0	0	0	0	0	0	0	0	0	0
44065	0	0	0	0	0	0	0	0	0	0	0	0	0	0	0	4	1	25	2	23	12	8	4	36	0	0	0	0	0	0	0	0	0	0	0	0	0	0	0	0	0	0	0	0	0	0	0	0	0
44126	0	0	0	0	0	0	0	17	8	0	0	0	0	2	0	0	0	0	0	0	0	0	0	0	0	0	0	0	0	0	0	0	0	0	0	0	0	0	0	0	0	37	34	43	0	0	0	0	0
44128	0	0	1	1	1	0	0	0	0	0	0	0	0	0	0	2	3	1	34	2	2	82	4	3	18	14	1	38	25	0	0	0	0	0	0	0	0	0	0	0	0	1	6	0	26	12	14	7	13
44147	0	0	0	0	0	0	0	0	0	2	5	3	0	2	0	0	0	0	3	0	0	0	4	0	0	0	0	0	0	0	1	6	39	8	0	0	0	0	0	0	0	0	2	0	0	0	0	0	0
44180	0	0	0	0	0	0	0	0	0	1	0	0	0	0	0	0	0	0	0	0	0	0	0	0	0	0	0	0	0	0	0	0	0	0	0	0	0	0	0	0	0	33	19	13	0	0	0	0	0
44202	0	0	0	0	1	9	14	0	0	0	0	0	0	0	0	0	0	0	0	0	0	0	0	0	0	0	0	0	0	7	2	0	1	0	4	6	3	23	2	0	0	2	2	2	26	28	12	75	15
44220	3	0	68	0	0	0	0	0	0	7	0	5	0	0	0	0	0	0	0	0	0	0	0	0	0	0	0	0	0	0	0	0	0	0	0	0	0	0	0	0	0	0	0	0	1	0	0	0	0
44294	0	0	0	0	0	0	0	0	0	0	0	0	0	0	0	0	0	0	54	6	0	0	0	0	0	0	0	0	0	0	0	0	0	0	0	0	0	0	0	0	0	0	0	0	0	0	0	0	0
44338	0	0	0	3	1	0	12	3	12	0	0	0	5	0	0	0	1	3	30	0	0	0	18	2	1	0	0	0	0	0	0	0	1	0	0	0	1	0	0	0	1	0	0	0	0	0	0	0	0
44341	0	1	0	4	0	0	0	0	0	0	0	3	0	263	323	0	0	0	0	0	0	0	12	0	0	0	0	0	0	0	0	0	0	0	16	0	1	0	0	0	0	0	0	0	0	0	0	1	0
44345	0	0	0	0	0	0	0	0	0	0	0	0	0	0	0	0	0	0	0	0	0	0	0	0	0	0	0	0	0	0	0	0	0	0	0	0	0	0	0	0	0	38	55	37	0	0	0	0	0
44393	0	0	0	0	0	0	0	0	0	49	2	0	0	0	0	0	0	0	0	0	0	0	0	0	0	0	0	0	0	0	0	5	0	0	0	0	0	0	0	0	0	0	0	0	0	0	0	0	0
44411	0	0	0	0	0	0	0	0	0	0	0	0	0	0	0	0	0	0	0	0	0	0	0	0	0	0	0	0	0	0	0	0	0	0	0	0	0	0	0	0	0	1	0	2	0	0	2	1	0
44414	0	0	0	0	0	0	0	0	0	0	0	0	0	0	0	0	0	0	0	0	0	0	0	0	0	0	0	0	0	0	0	0	0	0	0	0	0	0	0	0	0	0	1	1	19	8	13	8	4
44418	0	0	0	1	8	3	25	0	6	0	0	0	1	0	0	0	0	0	0	0	0	0	0	0	0	0	0	0	0	0	0	0	0	0	0	0	0	0	0	0	0	1	0	0	0	1	2	1	2
44444	7	1	3	0	0	0	0	1	0	1	0	3	0	3	16	0	0	0	5	0	0	0	41	12	0	0	0	0	0	0	2	0	4	2	4	10	7	2	14	0	0	0	0	0	0	0	0	0	0
44470	0	0	0	0	0	0	0	0	0	0	0	0	0	0	0	0	0	0	0	0	0	0	22	0	0	72	50	92	21	0	0	0	0	0	0	0	0	0	0	0	0	0	0	0	52	6	21	40	0
44484	0	0	0	0	0	0	0	0	0	0	0	0	0	0	0	0	2	0	0	0	109	8	6	6	0	0	0	0	0	0	0	0	0	0	0	0	0	0	0	0	0	0	0	0	0	0	0	0	0
44491	1	1	0	0	10	1	0	4	0	0	0	1	29	0	0	6	0	0	0	6	0	0	0	3	0	0	0	0	0	0	1	0	0	0	0	0	0	0	0	0	0	0	0	0	0	0	0	0	1
44504	0	0	0	5	0	9	21	0	2	0	0	0	42	0	0	7	0	5	7	2	19	14	17	52	4	10	0	19	7	0	0	0	0	0	0	0	0	0	0	0	0	0	0	0	0	0	0	0	0
44526	0	0	0	0	1	0	0	0	0	0	0	0	0	0	0	0	0	0	2	1	0	0	0	0	0	0	0	0	0	0	0	0	0	0	0	0	0	0	0	0	0	0	0	0	0	0	0	0	0
44604	0	0	0	0	0	0	0	0	0	0	0	0	0	0	0	0	0	0	2	0	0	0	0	0	0	0	0	0	2	0	0	0	0	0	0	0	0	0	0	0	0	0	0	0	0	0	0	0	0
44634	0	0	0	0	0	0	0	0	0	0	0	0	0	0	0	0	0	0	0	0	0	0	0	0	0	0	0	0	0	0	0	0	0	0	0	0	0	0	0	0	0	0	0	0	0	0	0	0	0
44640	0	0	1	1	3	4	3	0	1	0	0	0	0	0	0	2	3	0	0	0	0	30	2	0	0	0	0	0	0	0	0	0	0	0	1	1	0	4	0	0	0	1	2	0	4	2	2	4	1
44658	0	0	0	0	0	0	0	0	0	0	0	0	0	0	0	0	0	0	0	0	0	0	0	0	0	0	0	0	0	0	0	0	0	0	0	0	0	0	0	0	0	12	24	22	0	0	0	0	0
44661	0	0	0	0	0	0	0	0	0	0	0	0	0	0	0	0	0	0	0	0	0	0	0	0	0	0	0	0	0	0	0	0	0	0	0	0	0	0	0	0	0	0	0	0	33	2	0	12	15
44669	0	0	0	0	0	0	0	0	0	0	0	0	0	0	0	0	0	4	6	0	15	0	0	0	16	18	1	15	1	0	0	0	0	0	0	0	0	0	0	0	0	0	0	0	0	0	0	0	0
44673	0	0	0	0	0	0	0	0	0	32	46	0	0	0	0	0	0	0	0	0	0	0	0	0	0	0	0	0	0	0	0	4	0	0	0	0	0	0	0	0	0	0	0	0	0	0	0	0	0
44677	0	0	0	0	0	0	0	0	0	0	0	0	0	0	0	0	0	0	135	4	0	1	15	7	0	0	0	0	0	0	0	0	0	0	0	0	0	0	0	0	0	2	3	2	0	0	0	0	0
44734	1	1	1	1	0	0	0	0	0	0	0	0	0	0	0	0	0	0	10	0	0	0	0	0	0	0	0	0	0	2	1	0	1	0	4	6	9	23	0	0	0	0	0	0	0	2	0	0	0
44738	0	0	0	0	0	0	0	0	0	0	0	0	1	0	0	5	0	459	1965	360	0	179	35	150	0	0	0	0	0	0	0	0	0	0	0	0	0	0	0	0	0	0	0	0	0	0	0	0	0
44800	4	0	2	0	0	0	0	0	0	4	0	2	0	0	1	0	0	0	0	0	0	0	9	0	0	0	0	0	0	6	11	3	15	8	7	3	1	3	7	0	0	3	2	2	0	0	0	0	0
44821	0	0	0	0	0	0	0	0	0	0	0	0	0	0	0	0	0	0	0	0	5	78	0	0	0	0	0	0	0	0	0	0	0	0	0	0	0	0	0	0	0	0	0	0	0	0	0	0	0
44827	0	0	0	1	0	1	0	1	0	0	0	0	14	0	0	0	0	0	0	0	0	0	12	3	0	0	0	3	0	0	0	0	0	0	0	0	0	0	0	0	0	0	0	0	0	0	0	0	0
44893	0	0	0	0	0	0	0	0	0	0	0	0	31	0	0	4	0	0	0	0	1	0	0	0	0	0	0	0	0	0	0	0	0	0	0	0	0	0	0	0	0	0	0	0	0	0	0	0	0
44921	0	0	0	0	0	0	0	0	0	0	0	0	0	0	0	0	0	0	0	0	0	0	0	0	0	0	0	0	0	0	0	0	0	0	0	0	0	0	0	0	0	75	153	51	0	0	0	0	0
44923	0	0	0	0	0	0	0	0	0	0	0	0	0	0	0	11	45	0	0	0	0	0	0	0	4	0	0	5	3	0	0	0	0	0	0	0	0	0	0	0	0	0	0	0	0	0	0	0	0
44930	0	0	0	0	0	0	0	0	0	0	0	0	0	0	0	0	2	0	0	0	0	0	0	0	0	0	0	0	0	0	0	0	0	0	0	0	0	0	0	0	0	0	0	0	0	0	0	0	0
44934	0	0	0	0	0	0	0	0	0	15	50	0	0	0	0	0	0	0	0	0	0	0	0	0	0	0	0	0	0	0	0	80	5	2	0	0	0	0	0	0	0	0	0	0	0	0	0	0	0
44957	0	0	0	0	0	0	0	0	0	0	0	0	0	0	0	0	34	2	0	0	0	0	0	0	0	0	0	0	18	0	0	0	0	0	0	0	0	0	0	0	0	0	1	0	1	20	4	2	3
44965	0	0	0	0	0	0	0	0	0	0	0	0	0	0	0	0	0	0	0	0	0	0	0	0	0	0	0	0	0	0	0	0	0	0	0	0	0	0	0	0	0	0	0	0	0	0	0	0	0
44974	0	0	0	0	10	4	2	1	23	0	0	0	13	0	0	0	0	2	56	19	12	1	0	0	1	1	1	0	0	0	0	0	0	0	0	1	0	0	0	0	0	0	0	0	0	0	0	0	0
44992	1	1	0	0	0	0	0	0	0	16	8	0	0	0	1	0	0	0	0	0	0	0	0	0	0	0	0	0	0	0	0	66	3	3	9	0	3	0	0	0	0	6	2	13	0	0	0	0	1
45059	0	0	0	0	0	0	0	0	0	36	116	0	0	0	0	0	0	0	0	0	0	0	0	0	0	0	0	0	0	0	0	0	0	0	0	0	0	0	0	0	0	0	0	0	0	0	0	0	0
45061	0	1	0	0	0	0	0	0	0	1	0	1	0	0	0	0	0	0	1	0	0	0	1	0	0	0	0	0	0	0	0	0	0	0	0	0	0	0	0	0	0	14	16	22	0	0	0	0	0
45071	0	0	0	0	0	0	0	0	0	0	0	0	0	0	0	9	1	0	0	0	46	20	44	1	8	0	4	9	3	0	0	0	0	0	0	0	0	0	0	0	0	0	0	0	0	0	0	0	0
45084	0	0	0	0	0	0	1	0	0	0	0	0	0	2	1	0	9	0	0	0	0	3	0	25	1	3	0	15	1	0	0	0	0	0	0	0	0	0	0	0	0	0	0	0	0	0	0	0	0
45106	6	0	7	0	0	0	0	0	0	0	0	0	0	0	2	0	0	0	0	0	0	0	0	0	0	0	0	0	0	5	1	0	0	0	21	4	6	1	4	0	0	0	0	0	0	0	1	0	1
45111	0	0	0	0	0	0	0	0	0	15	62	0	0	0	0	0	0	0	0	0	0	0	0	0	0	0	0	0	0	0	0	24	0	0	0	0	0	0	0	0	0	2	0	0	0	0	0	0	0
45138	0	0	0	0	0	0	0	0	0	0	0	0	0	0	0	0	0	0	0	0	0	0	0	0	0	0	0	0	0	0	0	0	0	0	0	0	0	0	0	0	0	0	0	0	0	0	0	0	0
45149	0	0	0	1	3	84	86	2	0	0	0	0	0	0	0	0	0	0	0	0	0	0	0	0	0	0	0	0	0	0	0	0	0	0	0	0	0	0	0	0	0	0	0	0	0	0	0	0	0
45192	0	0	0	0	0	0	0	0	0	0	0	0	0	0	0	0	0	0	0	0	0	0	0	0	25	10	20	50	38	0	0	0	0	0	0	0	0	0	0	0	0	0	0	0	0	0	0	0	0
45202	4	0	0	0	0	0	0	0	0	2	0	0	0	0	0	0	0	0	0	0	0	0	0	0	0	0	0	0	0	16	3	0	0	0	1	2	1	0	0	2	0	0	0	0	0	0	0	31	2
45235	0	0	0	0	0	0	0	0	0	0	0	0	0	1	1	86	0	3	1	0	1	0	1	5	23	31	31	55	7	0	0	0	0	0	0	0	0	0	0	0	0	0	0	0	0	0	0	0	0
45269	0	0	0	0	0	0	0	0	0	0	0	0	0	0	0	1	0	2	6	0	0	0	0	0	0	0	0	0	0	0	0	0	0	0	0	0	0	0	0	0	0	0	0	0	0	0	2	0	0
45284	231	21	90	3	0	0	0	11	2	0	0	0	2	4	0	0	0	3	6	0	0	0	1	0	0	0	0	0	0	16	8	0	5	0	21	2	7	11	2	0	0	0	0	0	0	1	2	0	5
45292	0	0	0	0	0	0	0	0	0	0	0	0	0	0	0	0	0	0	0	0	0	0	0	0	0	0	0	0	0	0	0	0	0	0	0	0	0	0	0	0	0	0	0	0	0	0	0	0	0
45296	7	2	5	0	0	0	0	0	0	22	30	14	0	8	16	0	0	2	15	0	0	0	24	0	0	0	0	0	0	12	7	62	49	55	17	12	4	1	5	207	265	30	14	49	0	0	0	0	0
45312	0	5	2	0	0	0	0	3	2	0	0	3	0	0	1	0	0	31	81	0	0	0	40	31	0	0	0	0	0	0	0	0	0	0	2	2	0	0	0	0	0	0	0	0	0	1	0	0	6
45367	0	0	0	0	7	0	1	0	0	0	0	0	6	0	0	2	9	0	0	3	9	15	1	3	0	0	0	25	32	0	0	0	0	0	0	0	0	0	0	0	0	0	0	0	1	0	0	0	0
45390	0	0	0	0	1	3	5	4	2	0	0	0	0	0	0	5	15	13	11	0	6	41	8	7	4	2	0	4	0	0	0	0	0	0	0	0	0	0	0	0	0	0	0	0	0	0	0	0	0
45414	57	36	10	55	0	0	0	21	33	0	1	7	0	75	1	0	2	8479	11236	6	0	0	39	185	0	0	0	0	0	16	18	0	18	12	11	6	5	76	17	0	0	0	0	0	26	37	52	7	60
45442	0	0	0	0	0	0	0	0	0	0	0	0	0	0	0	0	0	21	116	20	0	0	0	0	1	0	0	0	0	0	0	0	0	0	0	0	0	0	0	0	0	0	0	0	0	0	0	0	0
45443	0	6	0	1	5	27	16	2	0	1	0	0	4	0	0	0	0	0	0	0	0	0	0	0	0	0	0	0	0	0	0	0	0	0	0	0	0	0	0	0	0	0	0	0	0	0	0	0	0
45503	2	0	0	0	0	0	0	0	0	124	180	8	0	5	7	0	0	0	0	0	0	0	12	0	0	0	0	0	0	5	13	181	55	47	32	35	22	4	0	0	0	1	0	0	1	1	2	0	0
45524	0	0	0	0	0	0	0	0	0	0	0	0	0	0	0	0	0	0	0	0	0	0	0	0	0	0	0	0	0	0	0	0	0	0	0	0	0	0	0	0	0	0	0	0	0	0	0	0	0
45554	0	0	0	0	0	0	0	0	0	0	0	0	0	0	0	0	0	0	0	0	0	0	0	0	0	0	0	0	0	0	0	0	0	0	0	0	0	0	0	0	0	0	0	0	0	0	0	0	0
45575	0	0	0	0	0	0	0	0	0	0	0	0	0	0	0	0	0	0	0	0	0	37	1	0	14	46	12	203	32	0	0	0	0	0	0	0	0	1	0	0	0	2	3	0	0	0	0	0	0
45580	1	3	10	5	0	0	0	0	0	2	3	0	0	33	0	0	0	0	0	0	0	0	3	0	0	0	0	0	0	5	0	1	0	0	6	11	2	0	0	0	0	20	2	4	1	0	1	0	0
45633	0	0	0	0	0	0	0	0	0	0	0	0	0	0	0	0	0	0	0	0	0	0	0	0	0	0	0	0	0	0	0	4	11	8	0	0	0	0	0	0	0	45	16	177	0	0	0	0	0
45650	0	0	0	0	0	0	0	0	0	0	0	0	0	0	0	1	0	0	3	0	0	0	0	0	0	0	0	0	0	0	0	0	0	0	0	0	0	0	0	0	0	0	0	0	0	0	0	0	0
45686	0	0	0	0	0	0	0	0	0	0	0	0	0	0	0	0	2	29	20	0	0	0	0	0	0	0	0	0	0	0	0	0	0	0	0	0	0	0	0	0	0	0	0	0	0	0	0	0	0
45695	0	0	0	0	0	0	2	0	0	0	0	0	1	0	0	0	11	0	0	0	92	106	20	29	1	1	0	9	13	0	0	0	0	0	0	0	0	0	0	0	0	0	0	0	0	0	0	0	0
45716	0	0	0	0	0	0	0	0	0	0	0	0	0	0	0	0	0	0	0	0	0	0	0	0	0	0	0	0	0	0	0	0	0	0	0	0	0	0	0	0	0	0	0	0	0	0	0	0	0
45755	0	0	0	0	0	0	0	0	0	0	0	0	0	0	0	0	0	2	122	2	7	0	0	0	0	0	0	0	0	0	0	0	0	0	0	0	0	0	0	0	0	0	0	0	1	0	0	0	0
45759	0	0	0	0	0	0	0	0	0	0	0	0	0	0	0	0	0	0	0	0	0	0	0	0	0	0	0	0	0	0	0	0	0	0	14	23	29	0	0	0	0	0	0	0	0	0	0	0	0
45776	0	0	0	0	0	0	0	0	0	0	0	0	0	0	0	0	15	0	0	0	0	2	0	1	0	0	0	0	0	0	0	0	0	0	0	0	0	0	0	0	0	0	0	0	1	0	1	3	0
45779	0	0	0	0	0	0	0	0	0	0	0	0	0	0	0	0	0	0	0	0	0	0	0	1	13	39	7	55	16	0	0	0	0	0	0	0	0	0	0	0	0	0	0	0	0	0	0	0	0
45784	2	4	4	0	0	0	1	0	0	26	578	6	0	1	0	0	0	1	0	0	0	1	1	0	0	0	1	0	0	0	44	129	130	224	5	23	58	0	0	29	217	17	4	7	75	47	167	34	1117
45797	0	0	0	0	0	0	0	0	0	0	0	0	0	0	0	0	0	10	95	3	0	0	0	0	0	0	0	0	0	0	0	0	0	0	0	0	0	0	0	0	0	0	0	0	0	0	0	0	0
45803	0	0	0	0	0	0	0	0	0	0	0	0	0	0	0	0	0	0	0	0	0	0	0	0	0	0	0	0	0	0	0	0	0	0	0	0	0	0	0	0	0	0	0	0	0	0	0	0	0
45808	0	0	0	0	1	0	1	0	0	0	0	0	0	0	0	8	59	1	3	1	2	3	10	6	11	2	0	9	6	0	0	0	0	0	1	0	0	0	1	0	0	0	0	0	0	1	1	0	0
45844	0	0	0	0	0	0	0	0	0	0	0	0	0	0	0	0	0	0	0	0	0	0	0	0	0	0	0	0	0	0	0	0	0	0	0	0	0	0	0	0	0	24	0	37	0	0	0	1	0
45849	0	0	0	0	0	0	0	0	0	0	0	0	0	0	0	0	0	0	1	0	0	0	0	0	0	0	0	0	0	0	0	0	0	0	0	0	0	0	0	0	0	0	2	0	12	3	21	13	0
45851	0	0	0	0	0	0	0	0	0	0	0	0	0	0	0	0	0	0	0	0	0	0	0	0	0	0	0	0	0	0	0	0	0	0	0	0	0	0	0	0	0	0	0	0	0	0	0	0	0
45853	0	0	0	0	0	1	0	0	0	0	0	0	0	0	0	5	0	0	1	0	0	0	0	3	0	0	0	0	0	0	0	0	0	0	0	0	0	0	0	0	0	0	0	0	0	0	0	0	0
45859	8	21	1	100	252	317	242	206	193	0	1	1	27	0	0	0	0	0	0	0	0	0	0	0	0	0	0	0	0	15	12	0	0	1	14	16	27	1	0	0	0	2	4	2	0	0	0	0	1
45867	0	0	0	3	0	0	0	0	0	0	0	0	0	0	0	0	282	0	0	0	0	0	0	0	0	0	0	0	0	0	0	0	0	0	0	0	0	0	0	0	0	0	0	0	0	0	0	0	0
45878	2	0	0	0	0	0	0	0	0	0	0	0	0	0	0	0	0	0	0	0	0	0	4	0	0	0	0	0	0	0	0	0	1	0	0	0	0	0	0	0	0	25	9	16	6	0	1	0	1
45884	0	0	0	0	0	0	0	0	0	0	0	0	0	0	0	7	0	0	0	0	104	7	2	2	0	0	0	0	0	0	0	0	0	0	0	0	0	0	0	0	0	0	0	0	0	0	0	0	0
45947	0	0	0	0	17	3	10	0	2	0	0	0	30	0	2	0	0	0	0	0	0	55	0	0	8	5	1	115	39	3	0	0	0	0	26	32	35	2	0	0	0	0	0	1	5	3	10	26	0
45980	0	0	0	17	0	0	0	38	0	0	0	0	0	0	0	0	0	0	0	0	0	0	0	0	0	0	0	0	0	1	1	0	0	0	2	5	0	2	0	0	0	0	1	1	0	0	0	0	0
46032	5	0	7	0	0	0	0	0	0	6	1	4	0	2	0	0	0	0	11	0	0	0	26	0	0	0	0	0	0	0	0	1	1	0	0	1	1	0	0	15	14	0	0	0	1	0	0	0	0
46059	0	0	0	0	0	0	0	0	0	0	0	0	0	0	0	0	0	0	0	0	0	0	0	0	0	0	0	0	0	0	0	0	0	0	0	0	0	0	0	0	0	0	6	0	0	0	0	0	0
46060	0	0	0	0	0	0	0	0	0	0	0	0	0	0	0	0	0	0	0	0	0	0	0	0	0	0	0	0	0	4	0	1	4	0	0	2	6	1	0	0	0	3	6	6	5	10	6	7	11
46087	0	1	0	0	3	8	7	17	1	0	3	0	100	0	0	0	0	0	0	0	0	0	0	0	0	0	0	0	0	0	0	2	0	1	5	0	1	1	0	0	0	3	5	7	4	0	1	2	0
46138	0	0	0	0	0	0	0	0	0	0	0	0	0	0	0	30	3	0	0	0	114	24	0	198	143	87	621	47	594	3	2	0	0	0	0	0	0	15	14	0	0	0	0	0	538	108	254	309	34
46174	0	0	0	0	0	0	0	0	0	0	0	0	0	0	0	0	0	0	0	0	0	0	49	0	5	0	1	0	0	0	0	0	0	0	0	0	0	0	0	0	0	0	0	0	0	0	0	1	0
46184	0	0	0	0	0	0	0	0	0	0	0	0	0	0	0	0	0	0	78	0	0	0	0	0	0	0	0	0	0	0	0	0	0	0	0	0	0	0	0	0	0	0	0	0	0	0	0	0	0
46213	0	0	0	0	0	0	0	0	0	0	0	0	0	0	0	0	25	0	0	0	0	0	0	0	0	0	0	0	0	0	0	0	0	0	1	1	7	62	0	0	0	0	0	0	0	0	0	0	0
46254	0	0	0	0	0	0	0	0	0	0	0	0	0	0	0	78	0	0	0	0	0	0	7	61	0	0	0	0	0	0	0	0	0	0	0	0	0	0	0	0	0	0	0	0	0	0	0	0	0
46258	0	0	0	5	8	56	32	13	1	0	0	1	6	0	2	1	0	0	0	0	0	0	0	0	0	0	0	0	0	3	7	0	0	0	0	2	2	1	0	0	0	0	4	1	0	0	0	0	0
46275	10	6	9	19	0	0	0	4	18	0	3	37	0	1	16	0	0	0	1	0	0	0	0	1	0	0	0	0	0	13	17	0	20	12	46	51	39	0	1	0	0	0	1	0	27	32	6	35	72
46379	0	0	0	0	0	0	0	0	0	0	0	0	0	0	0	0	0	0	0	0	0	1	0	0	52	0	0	0	0	0	0	0	0	0	0	0	0	0	0	0	0	0	0	0	2	2	4	1	0
46382	0	0	29	0	30	9	9	4	0	0	0	0	1	9	1	3	2	0	13	0	0	0	1	4	2	22	7	7	48	1	2	0	0	0	0	0	0	8	11	0	0	0	0	0	0	0	0	0	0
46428	0	0	0	0	0	0	0	0	0	0	0	0	0	0	0	0	0	0	0	0	0	0	0	0	0	0	0	0	0	0	0	0	0	0	0	0	0	0	0	0	0	0	0	0	0	0	0	0	0
46431	0	0	0	0	0	0	0	0	0	0	0	0	0	0	0	0	8	0	0	0	0	0	0	0	0	0	0	0	0	0	0	0	0	0	0	0	0	0	0	0	0	0	0	0	0	0	1	0	0
46474	0	0	0	0	0	0	0	0	0	0	0	0	0	0	0	10	94	0	1	0	31	304	2	11	38	18	0	15	22	0	4	0	0	0	0	0	0	1	0	0	0	0	1	0	4	6	1	1	1
46491	0	0	0	0	0	0	0	0	0	0	0	0	0	0	0	0	0	0	0	0	0	0	0	0	0	0	0	0	0	0	0	0	0	0	0	0	0	0	0	0	0	51	53	65	0	0	0	0	0
46509	3	1	4	12	24	10	10	8	19	0	0	0	20	1	0	0	0	0	0	0	0	0	0	0	0	0	0	0	0	1	0	2	2	0	2	1	2	23	1	0	0	8	8	1	136	74	207	129	27
46528	0	0	0	0	0	0	0	0	0	0	0	0	0	0	0	3	18	0	1	1	0	0	0	0	0	0	0	0	0	0	0	0	0	0	0	0	0	0	0	0	0	0	0	0	1	1	0	0	0
46532	0	0	0	0	0	0	0	0	0	0	0	0	0	0	0	0	0	0	0	0	5	0	0	0	0	0	0	0	0	0	0	0	0	0	0	0	0	0	0	0	0	0	0	0	0	0	0	0	0
46534	0	0	0	0	0	0	0	0	0	0	0	0	0	0	0	0	156	20	1	0	26	1031	3	20	22	15	0	16	2	0	0	0	0	0	0	0	0	0	0	0	0	0	0	0	0	0	0	0	0
46536	0	0	0	3	0	0	1	0	0	0	0	0	114	0	0	3	0	0	0	0	0	0	4	0	0	0	0	3	1	0	0	0	0	0	0	0	0	0	0	0	0	0	1	0	1	0	5	6	0
46541	0	0	0	1	0	1	0	2	1	0	0	0	1	0	0	0	0	2	1	0	6	33	8	10	4	0	0	2	4	0	0	0	0	0	0	0	0	0	0	0	0	0	0	0	4	0	2	1	0
46543	0	0	0	0	0	0	0	0	0	0	0	0	0	0	0	0	0	0	0	0	0	0	0	0	0	0	0	0	0	0	0	0	0	0	0	0	0	0	0	0	0	0	0	0	0	0	0	0	0
46576	0	0	0	0	0	0	0	0	0	0	0	0	0	0	0	0	0	0	0	0	0	0	0	0	0	0	0	0	0	0	0	0	0	0	0	0	0	0	0	63	84	0	0	0	0	0	0	0	0
46669	0	0	0	0	0	0	0	0	0	1	0	0	0	1	0	0	0	0	0	0	0	0	1	0	0	0	0	0	0	0	0	2	7	5	0	0	0	0	0	0	0	17	88	17	6	5	13	5	3
46678	0	0	0	0	0	0	3	0	0	0	0	0	1	0	0	0	0	0	3	0	0	7	1	0	1	1	0	3	1	0	0	0	0	0	0	0	0	0	0	0	0	1	0	0	0	0	0	0	0
46687	0	0	0	0	0	0	0	0	0	12	4	0	0	0	0	0	0	0	0	0	0	0	0	0	0	0	0	0	0	0	0	0	0	1	0	0	0	0	0	0	0	89	88	51	0	0	0	0	0
46699	0	19	0	7	0	0	0	2	1	0	1	0	0	0	0	0	0	0	3	0	0	0	1	0	0	0	0	0	0	1	0	0	0	2	5	3	7	0	0	0	0	0	0	0	1	2	1	1	3
46701	0	0	1	0	0	0	0	0	0	20	44	4	0	18	20	0	0	22	32	0	0	0	58	0	0	0	0	0	0	0	1	48	0	3	2	0	0	1	1	0	0	7	4	3	0	0	0	0	1
46753	0	137	0	6	0	0	0	1	2	6	2	46	0	24	18	0	0	0	0	0	0	0	81	5	0	0	0	0	0	8	18	0	12	5	69	29	65	1	0	0	0	0	0	0	23	37	11	4	50
46807	0	0	0	0	2	0	1	0	0	0	0	0	0	0	0	4	11	0	1	1	2	24	0	0	0	0	0	1	4	0	0	0	0	0	0	0	0	0	0	0	0	1	0	0	0	0	0	1	0
46819	0	0	0	0	0	0	0	0	0	0	68	0	0	0	0	0	1	0	0	0	0	0	0	0	0	0	0	0	0	0	0	0	0	5	0	0	0	0	0	0	0	0	0	0	0	0	0	0	1
46894	0	0	0	0	0	0	0	0	0	0	0	0	0	0	0	0	0	0	0	0	0	2	0	0	0	0	0	0	0	0	0	0	0	0	0	0	0	0	0	0	0	0	0	0	0	0	0	1	0
46946	0	0	0	0	0	0	0	0	0	0	0	0	0	0	0	0	0	0	0	0	0	0	0	0	0	0	0	0	0	0	0	0	0	0	0	0	0	0	0	0	0	3	50	2	0	0	0	0	0
46947	0	0	0	0	0	0	0	0	0	45	40	0	0	0	0	0	0	0	0	0	0	0	0	0	0	0	0	0	0	0	0	62	1	3	0	0	0	0	0	0	0	0	0	0	0	0	0	0	0
46994	0	0	0	0	0	0	0	0	0	0	0	0	0	0	0	0	0	0	0	0	0	0	0	0	0	0	0	0	0	0	0	0	0	0	0	0	0	0	0	0	0	19	41	13	0	0	0	1	1
47028	0	0	0	0	0	0	0	0	0	0	0	0	0	0	0	0	3	0	16	0	0	0	5	1	0	0	0	0	0	0	0	0	0	0	0	0	0	0	0	0	0	0	0	0	0	0	0	0	0
47042	0	0	0	0	0	0	0	0	0	0	0	0	0	0	0	0	0	0	0	0	0	0	0	0	0	0	0	0	0	0	0	0	0	0	0	0	0	0	0	0	0	0	0	0	0	0	0	0	0
47084	0	0	0	0	0	0	0	0	0	0	0	0	0	0	0	0	0	0	0	0	0	0	0	0	0	0	0	0	0	0	0	0	0	0	0	0	0	0	0	0	0	0	0	0	0	0	0	0	0
47085	0	0	0	0	0	0	1	0	0	0	0	0	0	0	0	0	1	0	1	0	2	0	1	3	3	0	0	0	1	0	0	0	0	0	0	0	0	0	0	0	0	0	0	0	0	0	0	0	0
47111	0	0	0	0	0	0	0	0	0	0	0	0	0	0	0	0	0	0	0	0	0	0	0	0	0	0	0	0	0	0	0	0	0	0	0	0	0	0	0	0	0	0	0	0	3	1	3	2	0
47123	0	0	0	0	0	0	0	0	0	0	0	0	0	0	0	0	0	0	1	0	5	34	0	0	0	0	0	0	0	0	0	0	0	0	0	0	0	0	0	0	0	0	0	0	0	0	0	0	0
47148	0	0	1	13	2	11	15	6	3	0	0	0	3	0	0	0	0	0	0	0	7	0	0	0	0	0	0	0	0	0	0	0	0	0	0	2	3	0	0	0	0	0	0	0	0	0	3	0	0
47257	0	1	93	794	186	2028	1513	230	343	1	0	37	2	0	23	0	0	0	0	0	0	1	0	0	0	0	0	0	0	148	68	1	0	1	0	0	0	243	28	0	0	153	639	257	63	2471	54	240	1288
47261	1	17	3	3	0	0	0	18	5	6	3	41	0	47	229	0	0	74	25	0	0	1	177	60	0	0	0	0	0	0	1	0	2	66	3	0	0	4	0	0	0	0	0	0	35	15	21	58	24
47268	1	3	12	2	0	0	0	0	0	107	35	12	0	2	52	0	0	0	0	0	0	0	11	0	0	0	0	0	0	36	70	42	87	140	36	24	26	123	61	0	0	19	86	8	1	1	0	1	5
47317	0	0	0	0	0	0	0	0	0	0	0	0	0	0	0	0	8	0	0	0	0	8	0	0	0	0	0	3	0	0	0	0	0	0	0	0	0	0	0	0	0	1	0	0	0	1	0	0	0
47351	0	0	0	0	0	0	0	0	0	5	2	0	0	0	0	0	0	0	0	0	0	0	21	0	0	0	0	0	0	0	0	0	9	0	0	0	0	0	0	0	7	0	0	0	0	0	2	0	6
47353	466	81	125	2	0	0	0	18	22	41	17	215	0	5	79	0	0	46	159	0	0	1	1200	8	0	0	0	0	0	139	54	17	167	146	400	521	321	38	17	0	0	0	0	0	2	8	2	1	4
47354	0	0	0	0	0	0	0	0	0	0	0	0	0	0	0	0	4	0	0	0	0	0	0	0	0	0	0	0	0	0	0	0	0	0	0	0	0	0	0	0	0	0	0	0	0	0	0	0	0
47370	5	1	12	0	0	0	0	0	0	0	0	2	0	3	14	0	0	8	17	0	0	0	33	0	0	0	0	0	0	0	8	2	29	8	3	1	1	5	0	0	0	0	0	0	0	1	0	0	0
47380	0	0	0	0	0	0	0	0	0	0	0	0	0	0	0	0	0	0	6	2	0	0	0	0	0	0	0	0	0	0	0	0	0	0	0	0	0	0	0	0	0	0	0	0	0	0	0	0	0
47391	0	0	0	0	0	0	0	0	0	0	0	0	0	0	0	0	75	0	0	0	0	0	0	0	0	0	0	0	0	0	0	0	0	0	0	0	0	0	0	0	0	0	0	0	0	0	0	0	0
47405	0	0	0	0	0	0	0	0	0	0	0	0	0	0	0	0	0	0	0	0	0	0	0	0	0	0	0	0	0	0	0	0	0	0	0	0	0	0	0	0	0	33	9	14	0	0	0	0	0
47431	0	0	0	0	0	0	0	0	0	0	0	0	0	0	0	8	0	0	0	0	0	0	30	71	0	0	0	0	0	0	0	0	0	0	0	0	0	0	0	0	0	0	0	0	0	0	0	0	0
47441	0	0	0	0	0	0	0	0	0	0	0	0	0	0	1	0	0	0	0	0	0	0	0	0	3	47	1	47	7	0	0	0	0	0	0	0	0	0	0	0	0	0	0	0	1	0	0	3	0
47459	0	0	0	0	0	0	0	0	0	0	0	0	0	0	0	0	1	0	4	0	0	3	0	0	4	0	0	0	0	0	0	0	0	0	0	0	0	0	0	0	0	0	0	0	0	0	0	0	0
47519	1	0	0	0	0	0	0	0	0	0	0	0	0	0	0	0	0	0	0	0	0	0	0	0	0	0	0	0	0	0	0	0	10	10	2	0	0	0	0	0	0	11	14	59	0	0	0	0	0
47574	0	0	0	0	0	0	0	0	0	0	0	0	0	0	0	0	0	0	0	0	0	0	0	0	0	0	0	0	0	0	0	0	0	0	0	0	0	0	0	0	0	0	0	0	0	0	0	0	0
47612	0	0	0	0	0	0	0	0	0	0	0	0	0	0	0	0	0	0	0	0	0	0	0	0	7	27	1	12	8	0	0	0	0	0	0	0	0	0	0	0	0	0	0	0	0	0	0	0	0
47620	0	0	0	0	0	0	0	0	0	0	0	0	0	0	0	35	65	0	17	0	349	926	73	80	0	0	0	17	2	0	0	0	0	0	0	0	0	0	0	0	0	0	0	0	0	0	0	0	0
47632	0	0	0	0	0	0	0	0	0	0	0	0	0	0	0	0	0	0	0	0	0	0	0	0	0	0	0	0	0	0	0	0	0	0	0	0	0	0	0	0	0	0	0	0	0	0	0	0	0
47634	0	0	0	5	18	3	38	7	13	0	0	0	1	0	0	0	0	0	0	0	0	0	0	0	0	0	0	0	0	0	0	0	0	0	0	0	0	0	0	0	0	0	0	0	0	0	0	0	0
47683	0	0	0	0	0	0	0	0	0	0	0	0	0	0	0	0	26	0	0	0	0	5	0	0	0	0	0	13	9	0	0	0	0	0	0	0	0	0	0	0	0	1	5	2	0	1	1	0	0
47818	0	0	0	0	0	0	0	0	0	0	0	0	0	0	0	0	0	0	0	0	11	0	0	5	0	0	4	0	0	0	0	0	0	0	0	0	0	0	4	0	0	0	0	0	0	0	0	0	0
47821	0	0	0	0	0	0	0	0	2	0	0	0	0	0	0	25	512	4	11	18	4	146	13	4	32	23	0	22	24	0	0	0	0	0	1	1	0	6	0	0	0	0	1	1	2	1	8	17	2
47867	0	0	0	0	0	0	0	0	0	0	0	0	0	0	0	0	0	0	0	0	1	63	0	0	0	0	0	0	0	0	0	0	0	0	0	0	0	0	0	0	0	0	0	0	0	0	0	0	0
47929	0	0	0	2	0	0	0	0	0	0	0	0	0	0	0	4	9	0	1	0	14	396	0	5	0	0	0	0	0	0	0	0	0	0	1	2	0	0	0	0	0	0	0	0	54	13	52	50	5
47936	0	0	0	0	0	0	0	0	0	5	0	2	0	0	0	0	0	0	0	0	0	0	0	0	0	0	0	0	0	0	0	0	1	0	0	0	0	0	0	0	0	61	13	44	1	0	0	1	0
47946	0	0	0	0	0	0	0	0	0	0	0	0	0	0	0	2	1	2	8	2	0	0	5	0	4	1	0	4	8	0	0	2	0	0	0	0	0	3	0	0	0	0	0	1	0	0	2	2	1
47966	0	0	0	0	0	0	0	0	0	0	0	0	0	0	0	0	0	347	15	0	43	1	30	55	0	4	0	1	1	0	0	0	0	0	5	0	2	0	0	0	0	0	0	0	0	0	0	0	0
47967	0	0	0	0	0	0	0	0	0	0	0	0	0	0	0	0	23	0	1	0	0	0	0	1	0	0	0	0	0	0	0	0	0	0	0	0	0	0	0	0	0	0	0	0	5	1	34	39	0
47983	0	0	0	0	0	0	0	0	0	0	0	0	0	0	0	0	0	0	0	0	0	0	0	0	15	14	1	19	45	0	0	0	0	0	0	0	0	0	0	0	0	0	0	0	0	0	0	0	0
47986	0	0	0	0	0	0	0	0	0	56	71	0	0	0	0	0	0	0	0	0	0	0	0	0	0	0	0	0	0	0	0	26	0	0	0	0	0	0	0	0	0	0	0	0	0	0	0	0	0
48043	5	0	0	0	782	29	52	11	28	0	0	1	564	43	0	0	0	0	0	0	0	0	0	0	0	0	0	0	0	0	0	0	0	0	0	0	0	0	0	0	0	0	0	0	0	0	0	0	0
48052	0	0	0	0	0	0	0	0	0	0	0	0	0	0	0	3	4	12	130	28	3	168	25	98	2	2	0	3	9	0	0	0	0	0	0	0	0	0	0	0	0	0	0	0	0	0	0	0	0
48163	42	0	8	0	0	0	0	0	0	36	38	89	0	2	6	0	0	0	0	0	0	0	1	0	0	0	0	0	0	31	31	928	64	66	25	16	3	44	201	0	0	14	6	4	0	0	0	0	1
48182	0	0	0	0	0	0	0	0	0	0	0	0	0	0	0	0	0	0	0	0	0	0	0	0	0	0	0	0	0	0	0	0	0	0	0	0	0	0	0	0	0	213	1324	282	225	72	152	97	1
48215	1	0	0	0	7	9	12	20	7	0	0	0	15	0	0	0	0	0	0	0	0	0	0	0	0	0	0	0	0	0	0	0	0	0	0	0	0	0	0	0	0	0	0	0	0	0	0	0	0
48257	0	0	0	0	0	0	0	0	0	0	0	0	0	0	0	4	15	0	4	0	12	0	2	4	7	0	1	1	2	0	0	0	0	0	0	0	0	0	0	0	0	0	0	0	0	0	0	0	0
48285	15	14	13	22	0	0	0	2	3	19	5	7	0	17	16	0	0	2	23	0	0	0	30	4	0	0	0	0	0	22	27	2	27	16	12	14	4	10	2	0	0	1	3	1	0	1	0	0	1
48322	0	0	0	0	0	0	0	0	0	0	0	0	0	0	0	0	4	4	22	5	0	0	0	38	0	0	0	0	0	0	0	0	0	0	0	0	0	0	0	0	0	0	0	0	0	0	0	0	0
48323	0	0	1	0	0	0	0	0	0	6	242	0	0	0	0	0	0	0	1	0	0	0	0	0	0	0	0	0	0	0	0	0	0	0	0	0	0	0	0	0	0	0	0	0	0	0	0	0	0
48327	0	0	0	0	0	0	0	0	0	0	0	0	0	0	0	0	3	0	0	0	0	0	0	0	0	0	0	0	0	0	0	0	0	0	0	0	0	0	0	0	0	0	0	0	0	0	0	0	0
48338	586	39	30	8	0	1	0	2	3	0	0	0	0	48	38	0	0	9	10	0	0	0	3	0	0	0	0	1	0	229	119	0	5	21	256	238	180	73	332	0	0	0	0	0	1	1	3	4	26
48351	0	0	0	0	0	0	0	0	0	27	18	0	0	0	0	0	0	0	0	0	0	0	0	0	0	0	0	0	0	0	0	15	0	0	0	0	0	0	0	0	0	0	0	0	0	0	0	0	0
48424	11	19	9	0	0	0	0	0	1	0	0	2	0	4	4	0	0	1	9	0	0	0	0	0	0	0	0	0	0	4	26	0	4	0	5	9	3	2	4	0	0	3	2	4	2	1	1	0	1
48425	126	193	65	0	0	0	0	3	0	5	4	2	0	11	3	0	0	11	27	0	0	0	21	0	0	0	0	0	0	0	0	1	6	0	18	4	6	0	1	1	3	175	86	112	6	69	18	3	39
48438	0	0	0	0	0	0	0	0	0	0	0	0	0	0	0	0	0	0	0	0	0	0	0	0	0	0	0	0	0	0	0	0	0	0	0	0	0	0	0	0	0	0	0	0	0	0	0	0	0
48453	1	4	1	188	0	0	0	64	98	0	0	87	0	5	3	0	0	2	0	0	0	0	0	0	0	0	0	0	0	0	1	5	0	0	0	0	0	1	0	0	0	231	104	213	0	0	0	0	0
48460	1	0	1	1	0	0	0	0	0	0	6	1	0	0	2	0	0	0	0	0	0	0	36	0	0	0	0	0	0	6	7	0	9	4	0	0	1	0	1	0	0	1	1	0	0	0	0	0	0
48482	0	0	0	0	7	8	6	1	4	0	0	0	7	1	0	0	4	3	20	3	9	35	9	11	16	9	8	3	26	0	0	0	0	0	2	2	2	4	0	0	0	7	5	4	6	3	8	3	0
48500	0	0	0	0	0	0	0	0	0	0	0	0	0	0	0	0	0	0	0	0	0	0	2	0	12	3	5	2	2	0	0	0	0	0	0	0	0	0	0	0	0	0	0	0	1	0	0	0	0
48517	0	0	0	3	0	40	31	19	9	0	0	0	8	0	1	0	0	0	0	0	0	0	0	0	0	0	0	0	0	0	0	0	0	0	0	0	0	0	0	0	0	0	0	0	0	0	0	0	0
48584	7	7	0	30	107	170	154	46	85	1	0	10	35	4	0	0	0	0	0	0	0	0	0	0	0	0	0	0	0	0	0	0	0	0	0	0	0	0	0	0	0	0	0	0	0	0	0	0	0
48617	0	0	0	0	0	0	0	0	0	0	0	0	0	0	0	0	1	4	2	0	7	69	19	51	0	0	0	0	0	0	0	0	0	0	0	0	0	0	0	0	0	0	0	0	0	0	0	0	0
48641	0	0	0	0	0	0	0	0	0	0	0	0	0	0	0	0	0	0	0	0	0	0	0	0	20	17	3	19	43	0	0	0	0	0	0	0	0	0	0	0	0	0	0	0	0	0	0	0	0
48675	0	0	0	0	0	0	0	0	0	0	0	0	0	0	0	0	0	0	0	0	0	0	0	0	0	0	0	0	0	0	0	244	106	20	0	0	0	0	0	0	0	18	6	10	0	0	0	0	0
48713	37	46	20	0	0	0	0	0	0	0	0	1	0	1	0	0	0	0	0	0	0	0	0	0	0	0	0	0	0	7	2	0	0	0	11	21	12	1	12	0	0	0	0	0	0	0	0	0	0
48770	0	0	0	3	22	2	44	9	4	0	0	0	2	0	0	0	0	0	0	0	0	0	0	0	0	0	0	0	0	0	0	0	0	0	5	1	4	0	0	0	0	3	4	0	0	1	3	5	0
48804	0	0	0	0	0	0	0	0	0	0	0	0	0	0	0	76	34	0	2	0	10	51	3	11	0	0	0	0	0	0	0	0	0	0	0	0	0	0	0	0	0	0	0	0	0	0	0	0	0
48854	0	0	0	0	0	0	0	0	0	0	0	0	0	0	0	0	0	0	0	0	0	0	0	0	0	0	0	0	0	0	0	0	0	0	0	0	0	0	0	87	54	0	0	0	0	0	0	0	0
48882	0	0	0	0	0	0	0	0	0	0	0	0	0	0	0	0	2	33	0	2	153	16	3	15	0	0	0	29	113	0	0	0	0	0	0	0	0	0	0	0	0	0	0	0	0	0	0	0	0
48918	0	0	0	0	0	0	0	0	0	0	0	0	0	0	0	19	7	0	0	0	59	369	3	3	0	0	0	0	0	0	0	0	0	0	0	0	0	0	0	0	0	0	0	0	0	0	0	0	0
48936	0	0	0	0	0	0	0	0	0	0	0	0	0	10	0	1	3	5	40	2	11	5	27	9	2	4	5	2	5	0	0	0	0	0	0	0	0	0	0	0	0	0	0	0	0	0	0	0	0
48990	76	72	56	160	0	0	0	75	76	1	0	51	0	278	67	256	69	1888	5478	20	0	0	125	164	0	0	0	0	0	101	63	1	102	351	143	322	70	371	90	0	0	22	45	45	107	67	195	63	146
49020	0	0	0	0	0	0	0	0	0	0	0	0	0	0	0	0	4	0	0	0	0	0	0	0	0	0	0	0	0	0	0	0	0	0	0	0	0	2	0	0	0	0	1	0	2	1	2	0	0
49026	0	0	0	0	0	0	1	0	0	0	0	0	0	0	0	0	30	0	0	0	0	0	0	0	0	0	0	0	0	0	0	0	0	0	0	0	0	0	0	0	0	0	0	0	0	0	0	0	0
49033	0	0	0	1	1	2	1	1	2	0	0	0	7	1	0	0	0	0	0	0	3	9	6	4	0	0	0	0	0	1	0	0	0	0	3	3	2	5	0	0	0	7	7	1	7	0	2	5	0
49048	179	1	3	1	0	0	0	3	3	0	0	0	0	11	19	0	0	0	7	0	0	0	9	1	0	0	0	0	0	15	23	1	1	0	27	32	27	18	2	0	0	0	0	0	0	3	0	0	9
49050	4	1	0	0	0	0	0	0	0	14	9	48	0	2	3	0	0	0	0	0	0	0	25	0	0	0	0	0	0	4	19	3	40	76	9	19	11	55	71	0	0	1	2	0	0	0	1	0	2
49059	0	0	0	0	0	0	0	0	0	0	0	0	0	0	0	16	0	0	0	1	0	0	0	2	24	42	0	5	6	0	0	0	0	0	0	0	0	0	0	0	0	0	0	0	0	0	0	0	0
49067	0	0	0	0	0	0	0	0	0	0	0	0	0	0	0	0	0	0	0	0	0	0	36	0	0	0	0	7	2	0	0	0	0	0	0	0	0	0	0	0	0	0	0	0	0	0	0	0	0
49101	1	0	0	2	0	0	0	0	0	0	0	5	0	8	1	0	0	0	2	0	0	0	111	0	0	0	0	0	0	0	0	0	2	3	2	0	3	0	0	0	0	0	3	0	0	0	0	0	0
49122	0	0	0	0	0	0	0	0	0	0	0	3	0	0	2	0	1	0	0	0	5	1	1	1	9	3	8	16	4	0	0	0	0	0	0	0	0	0	0	0	0	0	0	0	0	0	0	0	0
49209	0	0	0	0	0	0	0	0	0	0	0	0	0	0	0	0	0	97	11	3	1	3	1	8	0	0	0	0	0	0	0	0	0	0	0	0	0	0	0	0	0	0	0	0	0	0	0	0	0
49253	3	0	1	0	0	0	0	1	0	0	0	0	0	2	1	1	0	10	0	6	0	0	0	0	0	0	0	0	0	0	0	0	0	0	0	0	1	0	0	9	8	0	0	0	2	1	2	3	2
49304	6	0	4	1	0	0	0	0	0	3	0	0	0	4	7	0	0	0	0	0	0	0	4	0	0	0	0	0	0	0	0	1	6	4	0	0	0	0	0	0	0	0	0	0	13	6	12	17	12
49310	0	0	0	0	9	0	0	7	0	0	0	0	0	0	0	0	8	1	0	0	0	0	39	5	1	0	0	1	0	0	0	0	0	0	0	1	1	0	0	0	0	0	0	0	3	0	0	0	0
49312	1	0	0	10	191	23	178	84	73	0	0	0	14	1	0	0	0	0	0	0	0	0	0	0	0	0	0	0	0	0	0	0	0	0	0	0	0	0	0	0	0	0	0	0	0	0	0	0	0
49313	0	0	0	0	0	0	0	0	0	0	0	0	0	0	0	5	4	7	29	5	7	112	0	16	9	5	0	43	9	0	0	0	0	0	0	0	0	0	0	0	0	0	0	0	0	0	0	0	0
49344	0	0	0	0	0	0	0	0	0	0	0	0	0	0	0	0	0	0	0	0	0	0	0	0	15	23	2	10	14	0	0	0	0	0	0	0	0	0	0	0	0	0	0	0	0	0	0	0	0
49385	4	0	0	1	17	3	8	0	0	0	0	0	30	5	0	0	0	0	0	0	0	0	0	0	0	0	0	0	0	0	0	0	0	0	0	0	1	0	0	0	0	0	0	0	0	0	0	0	0
49390	0	0	2	0	0	0	0	1	0	1	1	6	0	2	12	0	0	0	0	0	0	0	0	0	0	0	0	0	0	0	0	0	0	0	1	0	0	0	0	0	0	2	9	0	2	2	0	3	8
49436	0	0	0	1	1	0	1	1	1	0	0	0	0	0	0	1	4	0	1	1	12	0	0	0	2	0	0	1	1	0	0	0	0	0	0	0	0	0	0	0	0	0	0	0	0	0	2	2	1
49515	0	0	0	0	0	0	0	0	0	0	0	0	0	0	0	9	0	0	0	0	11	55	0	0	0	0	0	0	0	0	0	0	0	0	0	0	0	0	0	0	0	0	0	0	0	0	0	0	0
49517	1	0	0	1	0	0	0	0	3	0	0	1	0	1	0	0	0	129	66	0	0	0	0	0	0	0	0	0	0	0	0	0	0	0	0	0	0	0	0	0	0	0	0	1	0	1	0	0	0
49524	7	2	4	1	0	0	0	0	3	0	1	2	0	0	0	0	0	0	0	0	0	0	0	0	0	0	0	0	0	9	19	1	2	2	11	29	13	0	0	0	0	0	0	0	1	0	1	2	16
49525	0	0	0	0	0	0	0	0	0	0	0	0	0	0	0	952	0	0	0	0	0	0	25	12	0	0	0	0	0	0	0	0	0	0	0	0	0	0	0	0	0	0	0	0	0	0	0	0	0
49606	0	0	0	0	0	0	0	0	0	0	0	0	0	0	0	206	114	20	9	9	32	2415	33	126	23	21	69	0	8	0	0	0	0	0	0	0	0	0	0	0	0	0	0	0	0	0	0	0	0
49610	0	0	0	1	21	1	2	13	4	0	0	0	33	0	0	0	0	0	0	0	0	0	0	0	0	0	0	0	0	0	1	0	0	0	1	2	0	0	0	0	0	1	0	0	0	1	0	0	0
49616	0	0	0	0	0	0	0	9	0	0	0	0	0	0	0	0	0	0	0	0	0	0	0	0	0	0	0	0	0	33	21	0	0	11	0	0	0	18	95	0	0	0	0	0	0	0	0	0	0
49647	0	0	0	0	0	0	0	0	0	0	0	0	0	0	0	0	0	0	0	0	0	0	0	0	0	0	0	0	0	0	0	0	0	0	0	0	0	0	0	0	0	0	0	0	0	0	0	0	0
49708	0	0	0	0	0	0	0	0	0	0	0	0	0	0	0	0	0	0	0	0	43	0	0	0	0	0	0	0	0	0	0	0	0	0	0	0	0	0	0	0	0	0	0	0	0	0	0	0	0
49763	1	0	0	0	0	0	0	0	0	0	0	0	0	0	0	0	0	0	1	0	0	0	0	0	0	0	0	0	0	0	0	0	0	0	0	0	0	0	0	260	167	5	13	8	0	0	0	0	0
49783	0	0	0	0	0	0	0	0	0	0	0	0	0	0	0	0	0	0	0	0	0	0	15	46	0	0	0	0	0	0	0	0	0	0	0	0	0	3	0	0	0	0	0	0	0	0	0	0	0
49796	0	0	0	0	0	0	0	0	0	0	0	0	0	0	0	1	0	16	4	0	0	0	2	0	0	0	0	0	0	1	0	0	0	0	0	0	0	0	0	0	0	0	0	0	0	0	2	0	0
49802	10	0	0	0	0	0	0	0	0	0	0	24	0	0	0	0	0	0	0	0	0	0	30	0	0	0	0	0	0	9	7	0	60	46	1	7	1	0	0	0	0	0	0	0	0	0	0	0	0
49872	6	1	0	0	0	0	0	1	0	2	1	0	0	0	0	48	0	0	7	2	0	0	0	0	0	0	0	2	0	0	0	0	140	196	0	53	3	0	0	0	0	2	1	0	0	6	2	0	1
49891	0	0	0	0	0	0	0	0	0	0	0	0	0	0	0	0	0	0	0	0	0	0	0	0	0	0	0	0	0	0	0	0	0	0	0	0	0	0	0	69	68	0	0	0	0	0	0	0	0
49901	0	0	0	0	0	0	0	0	0	0	0	0	0	0	0	0	0	0	0	0	0	0	0	0	0	0	0	0	0	0	0	0	0	0	0	0	0	0	0	73	80	0	0	0	0	0	0	0	0
49928	3	1	1	0	0	0	0	0	0	0	0	2	0	18	0	0	0	15	18	0	0	0	0	0	0	0	0	0	0	0	0	0	0	0	1	0	0	0	0	0	0	0	0	0	0	1	0	1	1
49945	0	0	0	0	0	0	0	0	0	0	0	0	0	0	0	0	0	0	0	0	0	5	1	0	0	0	0	0	0	0	0	0	0	0	0	0	0	0	0	0	0	0	0	0	0	0	0	0	0
49970	3	10	2	180	12	141	125	62	29	0	0	0	219	6	4	0	3	8	8	0	470	0	82	24	6	0	1	30	6	19	25	0	3	0	5	4	13	5	0	0	0	3	16	3	0	8	0	6	4
49979	0	0	0	0	0	0	0	0	0	0	0	0	0	0	0	1	0	0	2	0	0	0	0	0	1	3	0	3	4	0	0	0	0	0	0	0	0	0	0	0	0	0	0	0	0	0	0	0	0
50061	0	0	0	0	0	0	0	0	0	0	0	0	0	0	0	0	0	0	0	0	0	2	0	0	0	0	0	0	0	0	0	0	0	0	0	0	0	0	0	0	0	0	0	0	0	0	0	0	0
50091	0	0	0	0	0	0	0	0	0	0	0	0	0	0	0	0	3	0	0	0	0	0	0	0	0	0	0	0	0	0	0	0	0	0	0	0	0	0	0	0	0	0	0	0	0	0	0	0	0
50127	0	0	0	0	0	0	0	0	0	0	0	0	0	0	0	0	0	0	1	0	0	2	0	0	0	0	0	0	0	0	0	0	0	0	0	0	0	0	0	0	0	0	0	0	0	0	0	0	0
50167	0	0	0	0	0	0	0	0	0	0	0	0	0	0	0	0	1	1	12	0	0	0	0	0	0	0	0	0	0	0	0	0	0	0	0	0	0	0	0	0	0	0	0	0	0	0	0	0	0
50170	0	0	0	0	0	8	13	1	0	0	0	0	0	2	0	0	0	0	0	0	6	1	112	0	204	128	59	95	85	0	1	0	0	0	0	0	0	0	0	0	0	0	0	0	15	3	9	6	0
50259	0	0	0	0	0	0	0	0	0	0	0	0	0	0	0	0	0	0	0	0	0	0	0	0	0	0	0	0	0	0	0	0	0	0	0	0	0	0	0	0	0	18	10	24	0	0	0	0	0
50280	0	0	0	0	0	0	0	0	0	0	0	0	0	0	0	10	0	0	53	0	0	0	5	8	0	0	0	0	0	0	0	0	0	0	0	0	0	0	0	0	0	0	0	0	0	0	0	0	0
50312	0	0	0	0	0	0	0	0	0	0	0	0	0	0	0	2	0	0	0	0	0	0	0	0	0	0	0	0	0	0	0	0	0	0	0	0	0	9	0	0	0	0	0	0	0	6	0	0	2
50326	1	1	2	0	0	0	0	0	0	1	6	2	0	1	6	0	0	0	0	0	0	0	21	0	0	0	0	0	0	9	20	2	10	8	0	9	3	15	16	0	0	7	2	4	0	0	1	0	0
50384	0	0	0	0	0	0	0	0	0	0	0	0	0	0	0	0	0	0	3	0	0	0	0	0	0	0	0	0	0	0	0	0	0	0	0	0	0	0	0	0	0	0	0	0	0	0	0	0	0
50441	0	0	0	0	0	0	0	0	0	0	0	0	0	0	1	0	12	0	0	0	0	0	0	0	0	0	0	0	0	0	0	0	0	0	0	0	0	0	0	0	0	0	0	0	0	0	0	0	0
50487	0	0	0	0	7	6	19	11	6	0	0	0	0	0	0	14	0	0	9	0	23	5	0	3	12	5	1	3	5	0	0	0	0	0	0	0	0	52	0	0	0	0	0	0	1	0	0	0	0
50492	0	0	1	0	6	0	10	3	16	0	0	0	6	0	0	119	1	9	107	81	2	1	0	0	0	1	0	1	4	0	0	0	0	0	0	0	0	0	0	0	0	0	0	0	3	12	53	16	1
50533	0	0	0	0	0	0	0	0	0	0	0	0	0	0	0	0	0	0	0	0	2	0	0	0	0	0	0	0	0	0	0	0	0	0	0	0	0	0	0	0	0	0	0	0	0	0	0	0	0
50544	0	0	0	0	0	0	0	0	0	0	0	0	0	0	0	0	0	0	2	0	0	63	0	0	0	0	0	0	0	0	0	0	0	0	0	0	0	0	0	0	0	0	0	0	0	0	0	0	0
50575	0	0	0	0	2	1	17	0	0	0	0	0	5	0	0	0	0	1	0	0	0	0	23	12	0	0	0	0	0	0	0	0	0	0	0	0	0	0	0	0	0	0	0	0	0	0	0	0	0
50612	0	0	0	0	0	0	0	0	0	27	47	0	0	0	0	0	0	0	0	0	0	0	0	0	0	0	0	0	0	0	0	0	0	0	0	0	0	0	0	0	0	0	0	0	0	0	0	0	0
50637	0	0	0	0	0	0	0	0	0	0	0	0	0	0	0	0	0	0	0	0	0	0	0	0	0	0	0	0	0	0	0	0	0	0	0	0	0	0	0	96	70	0	0	0	0	0	0	0	0
50656	0	0	0	0	0	0	0	0	0	0	0	0	0	0	0	0	0	0	0	0	0	0	0	0	0	0	0	0	0	4	2	0	0	0	0	0	0	0	0	0	0	9	30	11	13	22	8	9	9
50686	3	3	15	1	0	0	0	6	20	1	0	43	0	1	1	0	0	0	1	0	0	0	0	3	0	0	0	0	0	1	5	0	3	7	15	8	12	0	6	0	0	0	0	0	1	7	1	2	11
50707	12	14	15	59	95	57	49	45	74	1	0	6	23	0	0	0	0	0	0	0	0	0	0	0	0	0	0	0	0	0	0	0	0	0	0	0	0	0	0	0	0	0	0	0	0	0	0	0	0
50711	4	0	0	3	0	0	0	1	2	2	0	0	0	1	2	0	0	18	36	3	0	0	0	1	0	0	0	0	0	0	0	0	0	0	0	0	0	1	0	3	0	0	0	0	0	0	0	0	0
50728	0	2	0	1	0	0	0	0	0	1	0	20	0	39	13	0	0	0	0	0	0	0	69	1	0	0	0	0	0	3	12	3	10	0	4	5	5	14	1	0	0	3	0	1	1	2	4	0	0
50759	0	0	0	0	0	15	35	1	0	0	0	0	0	0	0	0	0	0	0	0	0	0	0	0	0	0	0	0	0	0	0	0	0	0	0	0	0	0	0	0	0	0	0	0	0	0	0	0	0
50772	0	0	0	0	0	0	0	0	0	0	0	0	0	0	0	0	0	0	0	0	0	0	0	0	0	0	0	5	2	0	0	0	0	0	0	0	0	0	0	0	0	0	0	0	0	0	0	1	0
50808	0	0	0	2	0	5	2	1	1	0	0	0	0	0	0	0	7	0	0	0	0	13	0	0	0	0	0	0	0	0	0	0	0	0	0	0	0	0	0	0	0	0	0	0	12	13	11	5	8
50837	0	0	0	0	0	0	6	0	0	0	0	0	3	2	0	24	0	22	153	20	56	624	14	2	0	0	0	0	0	0	0	0	0	0	0	0	0	1	0	0	0	0	0	0	0	0	1	3	0
50840	0	0	0	0	0	0	0	0	0	0	0	0	0	0	0	13	1	21	1	0	20	52	0	0	0	0	0	0	0	0	0	0	0	0	0	0	0	0	0	0	0	0	0	0	0	0	0	0	0
50854	0	0	3	0	2	13	15	7	3	0	5	5	60	1	0	0	0	0	0	0	0	0	0	0	0	0	0	0	0	1	4	1	2	1	6	19	12	177	12	0	0	1	1	0	5	5	9	36	5
50895	0	1	0	1	11	55	58	1	4	0	0	0	4	0	0	22	0	0	5	0	106	41	228	59	0	0	0	0	0	6	0	0	1	0	8	8	35	5	0	0	0	0	0	0	21	4	14	50	0
50932	0	0	0	0	0	0	0	0	1	0	0	0	0	0	0	0	0	0	7	1	0	0	0	1	0	0	0	0	0	0	0	0	0	0	0	0	0	0	0	0	0	0	0	0	0	0	0	0	0
50944	0	0	0	0	0	0	0	0	0	0	0	0	0	0	0	0	0	0	0	0	0	0	0	0	0	0	0	0	0	2	0	0	0	0	0	0	0	10	0	0	0	6	6	5	5	5	8	5	6
50952	0	0	0	0	0	0	0	0	0	0	0	0	0	0	0	19	0	0	0	0	45	158	0	2	0	0	0	0	0	0	0	0	0	0	0	0	0	0	0	0	0	0	0	0	0	0	0	0	0
50962	0	0	0	0	0	0	0	0	0	0	0	0	0	0	0	1	2	0	0	0	2	3	0	0	0	0	0	0	0	0	0	0	0	0	0	0	0	0	0	0	0	0	0	0	0	0	0	0	0
50967	0	0	0	0	0	0	0	0	0	0	0	0	0	0	0	119	0	0	0	0	6	0	21	252	0	0	0	0	0	0	0	0	0	0	0	0	0	0	0	0	0	0	0	0	0	0	0	0	0
51009	0	0	0	0	0	0	0	0	0	0	0	0	0	0	0	0	5	4	30	0	7	5	0	0	0	0	0	2	2	0	0	0	0	0	0	0	1	0	0	0	0	0	0	0	0	1	0	0	0
51019	4	0	4	0	0	0	0	0	0	3	3	0	0	1	0	0	0	0	0	0	0	0	0	0	0	0	0	0	0	0	1	5	730	258	0	0	0	0	0	0	0	0	0	0	0	0	2	0	1
51025	0	0	0	0	0	0	0	0	0	0	0	0	0	0	0	2	0	68	279	36	146	36	0	84	0	0	0	0	0	0	0	0	0	0	0	0	0	0	0	0	0	0	0	0	0	0	0	0	0
51029	0	0	0	0	0	0	0	0	0	0	0	0	0	0	0	0	0	0	0	0	0	0	0	0	0	0	0	0	0	0	0	0	0	0	0	0	0	0	0	0	0	46	13	49	0	0	0	0	0
51055	0	0	0	0	0	0	0	0	0	0	0	0	0	0	0	0	629	2	3	2	2	10	10	12	16	18	0	84	60	0	0	0	0	0	0	0	0	0	0	0	0	0	0	0	18	10	76	181	0
51058	0	0	0	0	0	0	0	0	0	0	0	0	0	0	0	5	0	6	28	3	0	0	12	0	0	0	0	0	0	0	0	0	0	0	0	0	0	0	0	0	0	0	0	0	0	0	0	0	0
51063	0	0	0	0	0	0	0	0	0	0	0	0	0	0	0	0	0	0	0	0	0	0	0	0	9	52	0	38	2	0	0	0	0	0	0	0	0	0	0	0	0	0	0	0	0	0	0	0	0
51107	0	0	0	0	0	0	0	0	0	0	0	0	0	0	0	0	0	0	0	0	0	0	0	0	3	12	3	24	16	0	0	0	0	0	0	0	0	0	0	0	0	0	0	0	0	0	0	0	0
51117	0	0	0	0	0	0	0	0	0	0	0	0	0	0	0	0	0	0	0	0	0	0	0	0	0	0	0	0	0	0	0	0	0	0	0	0	0	0	0	0	0	0	0	0	0	0	0	0	0
51120	0	0	0	0	0	0	0	0	0	0	0	0	0	0	0	0	2	16	111	3	0	5	0	0	0	0	0	0	0	0	0	0	0	0	0	0	0	0	0	0	0	0	0	0	0	0	0	0	0
51157	1	1	0	3	1	4	7	2	1	0	0	0	5	1	0	0	0	0	0	0	0	0	0	0	46	21	14	17	57	0	0	0	0	0	1	1	1	6	0	0	0	0	0	0	0	3	1	3	4
51170	0	0	0	0	2	0	0	0	2	0	0	0	12	0	0	0	1	0	0	0	242	1	0	0	0	0	0	0	0	0	0	0	0	0	0	0	0	0	0	0	0	0	0	0	1	0	1	0	0
51187	0	0	0	0	0	0	0	0	0	0	0	0	0	0	0	0	5	16	28	1	29	213	7	28	24	15	0	51	24	0	0	0	0	0	0	0	0	1	0	0	0	0	0	0	5	3	1	0	7
51206	0	0	0	0	0	0	0	0	0	0	0	0	0	0	0	2	0	0	0	0	74	0	0	0	0	0	0	0	0	0	0	0	0	0	0	0	0	0	0	0	0	0	0	0	0	0	0	0	0
51217	0	2	1	0	0	0	0	0	0	2	0	2	0	0	0	0	0	0	0	0	0	0	0	0	0	0	0	0	0	1	8	0	6	7	4	4	2	0	0	0	0	4	3	4	0	0	0	0	0
51254	0	0	0	0	0	0	0	0	0	0	0	0	0	0	0	2	0	1	0	0	0	0	0	0	0	0	0	0	0	0	0	0	0	0	0	0	0	0	0	0	0	0	3	1	0	0	0	2	0
51261	0	0	0	7	0	0	0	0	0	0	0	0	0	0	0	0	0	0	0	0	39	0	0	0	4	8	6	34	0	0	0	0	0	0	0	0	0	0	0	0	0	0	0	0	78	12	110	41	0
51318	3	6	3	38	84	156	206	103	218	0	0	2	245	12	2	68	137	2	63	1	15	845	417	53	19	49	17	54	28	8	1	0	5	3	4	1	10	11	3	0	0	3	15	7	60	49	90	138	20
51359	0	0	0	0	0	0	0	0	0	0	0	0	0	0	0	0	0	0	0	0	3	134	0	0	0	0	0	0	0	0	0	0	0	0	0	0	0	0	0	0	0	0	0	0	0	0	0	0	0
51383	0	0	0	0	0	0	0	0	0	0	0	1	0	0	0	0	0	0	0	0	0	0	0	0	0	0	0	0	0	0	0	0	0	0	0	0	0	0	0	0	0	0	0	2	0	0	0	0	0
51390	0	0	0	0	0	0	0	0	0	0	0	0	0	0	0	0	1	0	0	0	0	0	0	0	0	0	0	0	0	0	0	0	0	0	0	0	0	0	0	0	0	0	0	0	0	0	0	0	0
51399	1	0	0	0	0	0	0	0	0	1	1	0	0	0	0	6	1	5	4	21	4	6	7	1	0	1	0	1	0	0	0	0	1	0	0	0	0	0	3	2	2	0	0	0	0	0	0	0	0
51460	0	1	0	19	45	19	57	15	137	0	0	0	415	0	0	0	0	0	0	0	0	0	0	0	0	0	0	0	0	0	0	0	0	1	0	0	0	0	0	0	0	0	0	0	0	0	0	0	0
51549	0	0	0	0	9	0	1	0	0	0	0	0	0	0	0	0	3	0	0	0	1	1	0	0	0	0	0	0	0	0	0	0	0	0	0	0	0	0	0	0	0	0	0	0	0	0	0	0	0
51576	0	0	0	1	3	0	0	0	0	0	0	0	0	0	0	1	1	0	0	0	5	0	0	0	0	0	0	0	0	1	0	0	0	0	0	1	0	2	0	0	0	0	0	0	1	3	2	1	1
51581	0	0	0	0	0	0	0	0	0	0	0	0	0	0	0	0	0	0	0	0	0	0	0	0	0	0	0	0	0	0	0	0	0	0	0	0	0	0	0	0	0	0	0	0	0	0	0	0	0
51585	0	0	0	0	36	8	25	5	3	0	0	1	1	0	0	0	0	0	0	0	0	0	0	0	0	0	0	0	0	0	0	0	0	0	0	0	0	0	0	0	0	0	0	0	0	0	0	0	0
51590	0	0	0	0	0	18	41	0	0	0	0	0	0	0	0	0	6	0	0	0	0	0	0	0	0	0	0	0	0	0	0	0	0	0	0	0	0	0	0	0	0	0	0	0	0	0	0	0	0
51595	0	0	0	2	24	0	1	0	4	0	0	0	7	0	0	2	8	17	146	51	53	7	0	34	1	1	0	2	1	0	0	0	0	0	0	0	0	0	0	0	0	0	0	0	0	0	0	3	0
51605	0	0	0	0	0	0	0	0	0	0	0	0	0	0	0	0	0	0	0	0	0	0	0	0	0	0	0	0	0	0	0	0	0	0	0	0	0	0	0	0	0	0	0	0	0	0	0	0	0
51657	0	0	0	0	0	0	0	0	0	0	0	0	0	0	0	1	0	0	0	0	0	0	0	0	0	0	0	0	0	0	0	0	0	0	0	0	0	0	0	0	0	0	0	0	0	0	1	1	0
51688	2	5	10	143	176	220	493	361	188	0	0	3	457	20	5	0	0	0	0	0	0	0	0	0	0	0	0	0	0	0	0	0	0	0	0	0	0	0	0	0	0	0	0	0	0	0	0	0	0
51697	0	0	0	0	0	0	0	0	0	85	17	1	0	0	0	0	0	0	0	0	0	0	1	0	0	0	0	0	0	0	0	4	1	1	0	0	0	0	0	0	0	0	0	0	0	0	0	0	0
51713	0	0	0	0	0	0	0	0	0	0	0	0	0	0	0	0	0	0	0	0	0	0	0	0	0	0	0	0	0	0	0	0	0	0	0	0	0	0	0	0	0	0	0	0	0	0	0	0	0
51731	0	0	0	0	0	0	0	0	0	0	0	0	0	0	0	0	10	11	0	3	96	2	0	0	0	0	0	0	0	0	0	0	0	0	0	0	0	0	0	0	0	0	0	0	0	0	0	0	0
51800	15	1	0	0	0	0	0	1	0	1	0	9	0	1	141	0	0	1	0	0	0	0	468	0	0	0	0	0	0	0	0	0	1	0	0	0	0	0	0	0	0	0	0	0	0	0	0	0	0
51813	0	0	0	0	0	0	0	0	0	0	0	0	0	0	0	0	15	1	0	0	0	0	0	5	0	0	0	0	0	0	0	0	0	0	0	0	0	0	0	0	0	0	0	0	0	0	0	0	0
51814	0	3	1	108	51	104	59	14	17	0	0	0	0	0	0	0	0	0	0	0	0	0	0	0	0	0	0	0	0	0	0	0	0	0	0	0	0	0	0	0	0	0	0	0	0	0	0	0	0
51858	0	0	0	0	0	0	0	0	0	0	0	0	3	0	0	0	0	13	1	0	0	0	0	0	0	22	2	6	0	0	0	0	0	0	0	0	0	0	0	0	0	0	0	0	6	1	2	2	0
51866	0	0	0	0	0	0	0	0	0	0	0	0	5	0	0	7	1	0	0	4	24	68	47	87	0	0	0	0	0	0	0	0	0	0	0	0	0	0	0	0	0	0	0	0	0	0	0	0	0
51881	0	0	0	0	0	0	0	0	0	0	0	0	0	0	0	13	0	1	0	0	0	0	0	3	0	0	0	0	0	0	0	0	0	0	0	0	0	0	0	0	0	0	0	0	0	0	0	0	0
51891	54	3	19	1	0	0	0	0	0	11	0	14	0	473	2117	0	0	5	7	0	0	1	484	0	0	0	0	0	0	22	31	1	14	18	3	13	0	955	436	0	0	0	0	0	2	1	1	1	10
51913	0	0	0	3	0	0	0	0	0	0	0	0	0	0	0	8	0	0	0	0	5	0	0	1	1	0	0	2	13	0	0	0	0	0	0	0	0	0	0	0	0	0	0	0	0	0	0	0	0
51916	0	0	0	0	0	0	0	0	0	0	0	0	0	0	0	1	95	36	36	12	0	0	0	0	0	0	0	0	0	0	0	0	0	0	0	0	0	0	0	0	0	0	0	0	0	0	0	0	0
51954	0	0	0	0	0	0	0	0	0	0	0	0	0	0	0	10	56	0	1	0	0	2	0	1	0	0	0	0	0	0	0	0	0	0	0	1	0	0	0	0	0	0	0	0	4	13	9	7	3
51995	0	0	0	4	59	4	22	1	5	0	0	0	115	0	0	15	20	333	1309	164	27	51	256	342	0	0	0	0	0	0	0	0	0	0	0	0	0	0	0	0	0	0	0	0	0	0	0	0	0
52021	0	0	0	0	0	0	0	0	0	0	0	0	0	0	0	0	0	0	79	0	0	0	0	0	0	0	0	0	0	0	0	0	0	0	0	0	0	0	0	0	0	0	0	0	0	0	0	0	0
52034	0	0	0	0	0	0	0	0	0	0	0	0	4	0	0	0	3	0	0	0	98	2	0	0	0	0	0	0	0	0	0	0	0	1	2	1	1	0	0	0	0	0	0	0	4	0	3	2	0
52127	1	0	0	18	0	0	0	0	0	14	31	1	0	5	5	0	0	0	0	0	0	0	3	0	0	0	0	0	0	0	0	0	4	2	0	0	0	0	0	0	0	373	499	534	0	0	1	0	0
52150	0	0	0	0	0	0	0	0	0	1	4	0	0	1	1	0	0	3	32	0	0	0	25	0	0	0	0	0	0	0	0	0	0	0	0	0	0	0	0	0	0	0	0	0	0	0	0	0	0
52210	0	0	0	0	0	0	0	0	0	38	17	2	0	0	0	0	0	0	0	0	0	0	1	0	0	0	0	0	0	0	0	63	2	0	0	0	0	0	0	0	0	0	0	0	0	0	0	0	0
52222	0	0	0	0	0	0	0	0	0	0	0	0	0	0	0	0	2	0	0	0	0	0	0	0	8	9	0	0	0	0	0	0	0	0	0	0	0	0	2	0	0	0	0	0	0	0	0	0	0
52226	0	0	0	0	0	0	0	0	0	0	0	0	0	0	0	1	3	13	38	1	6	3	5	31	5	11	1	4	14	1	0	2	1	0	4	5	6	0	0	0	0	6	4	2	2	2	3	2	3
52261	0	0	0	0	0	0	0	0	0	0	0	0	0	0	0	0	0	3	0	1	0	0	46	0	0	0	0	0	0	0	0	0	0	0	0	0	0	0	0	0	0	0	0	0	0	0	0	0	0
52308	0	0	0	0	0	0	0	0	0	0	0	0	0	0	0	0	0	0	0	0	0	0	0	0	0	0	0	0	0	0	0	0	0	0	0	0	0	0	0	0	0	25	42	37	0	0	0	0	0
52326	0	0	0	0	0	0	0	0	0	0	0	0	0	0	0	0	2	0	0	0	0	15	13	6	0	0	2	9	5	0	0	0	0	0	0	0	0	0	0	0	0	0	0	0	0	0	0	0	0
52368	0	0	0	0	0	0	0	0	0	0	0	0	0	0	0	0	41	1	0	0	0	0	0	3	0	0	0	0	0	0	0	0	0	0	0	0	0	0	0	0	0	0	0	0	0	0	0	0	0
52371	30	73	10	221	0	0	0	14	31	0	1	3	0	15	2	0	0	3	32	0	0	0	5	1	0	0	0	0	0	8	40	0	1	2	1	4	4	0	2	0	0	1	1	2	0	1	1	0	0
52386	4	1	0	28	0	0	0	1	0	0	0	0	0	6	0	25	4	13	8	0	0	0	0	0	0	0	0	0	0	0	0	0	0	0	0	0	0	0	0	0	0	0	0	0	0	0	0	0	0
52448	0	0	0	0	0	0	0	0	0	0	0	0	0	0	0	0	0	0	0	0	0	0	0	0	0	0	0	0	0	0	0	0	0	0	0	0	0	0	0	0	0	0	0	0	0	0	0	0	0
52472	0	0	0	0	0	0	0	28	0	0	0	0	0	0	0	1	0	0	0	0	0	0	0	0	0	0	0	1	2	0	0	0	0	0	0	0	0	0	0	0	0	0	0	0	0	5	1	0	0
52476	0	0	0	0	0	0	0	0	0	0	0	0	0	0	0	0	20	0	0	0	0	0	0	0	0	0	0	0	0	0	0	0	0	0	0	0	0	0	0	0	0	0	0	0	0	0	0	0	0
52482	0	0	0	0	0	0	0	1	0	19	31	0	0	0	0	0	0	0	0	0	0	0	0	0	0	0	0	0	0	0	0	4	0	0	0	0	0	0	0	0	0	0	0	0	0	0	0	0	0
52489	0	0	0	0	0	0	0	0	0	0	0	0	0	0	0	0	0	0	0	0	0	13	0	0	1	0	1	2	0	0	0	0	0	0	0	0	0	0	0	0	0	0	1	0	5	0	0	2	1
52514	0	0	0	0	0	0	0	0	0	0	0	0	0	0	0	0	0	0	0	0	0	0	0	0	0	0	0	0	0	0	0	0	0	0	0	0	0	0	0	27	23	1	0	0	0	0	0	0	0
52516	0	0	0	0	0	0	0	0	0	35	46	2	0	0	3	0	0	0	0	0	0	0	63	0	0	0	0	0	0	0	0	17	5	6	0	0	0	0	0	0	0	0	0	0	0	0	0	0	0
52596	0	0	0	0	17	0	12	7	16	0	0	0	7	0	0	0	0	0	0	0	0	0	0	0	0	0	0	0	0	0	0	0	0	0	0	0	0	0	0	0	0	0	0	0	0	0	0	0	0
52609	3	0	0	0	0	0	0	0	0	121	45	1	0	0	0	0	0	0	1	0	0	0	0	0	0	0	0	0	0	0	0	1	0	0	0	0	0	0	0	0	0	0	0	0	0	0	0	0	0
52622	0	0	0	0	0	0	0	0	0	0	0	0	42	0	0	0	0	0	0	0	0	0	0	0	0	0	0	0	0	0	0	0	0	0	0	0	0	0	0	0	0	0	0	0	0	0	0	0	0
52638	0	0	0	0	0	0	0	0	0	0	0	0	0	0	0	0	0	0	0	0	0	14	1	1	0	0	0	63	1	0	0	0	0	0	0	0	0	0	0	0	0	0	0	0	0	0	0	0	0
52639	0	0	0	0	0	0	0	0	0	0	0	0	0	0	0	0	0	0	0	0	0	0	0	0	23	1	1	34	22	0	0	0	0	0	0	0	0	0	0	0	0	0	0	0	0	0	0	0	0
52648	0	0	0	0	0	0	0	0	0	0	0	0	0	0	0	0	0	0	0	0	0	0	0	0	20	0	0	14	24	0	0	0	0	0	0	0	0	0	0	0	0	0	0	0	0	0	0	0	0
52679	0	0	0	0	0	0	0	0	0	0	0	0	0	0	0	8	0	0	0	0	2	0	0	0	0	0	0	0	0	0	0	0	0	0	0	0	0	0	0	0	0	0	0	0	0	0	0	0	0
52683	0	0	0	0	0	0	0	1	0	0	0	0	0	0	0	10	0	8	0	0	8	72	11	1	0	0	0	0	0	0	0	0	0	0	0	0	0	0	0	0	0	0	0	0	0	0	0	0	1
52694	0	0	0	0	0	0	3	0	0	0	0	0	0	0	0	0	3	0	0	1	0	86	1	6	12	5	1	95	1	0	0	0	0	0	0	0	0	0	0	0	0	0	0	0	7	25	15	16	11
52698	11	0	6	0	0	0	0	1	0	3	22	0	0	0	0	0	0	0	0	0	0	38	0	0	60	0	3	1	0	256	176	50	82	5	11	57	56	1	323	598	490	2	0	0	28	34	94	953	1355
52726	0	0	0	0	0	0	0	0	0	0	0	0	0	0	0	0	0	0	0	0	0	2	0	0	27	3	0	0	11	0	0	0	0	0	0	0	0	0	0	0	0	0	0	0	0	1	0	0	0
52736	0	0	0	0	0	0	0	0	0	0	0	0	0	0	0	0	0	0	0	0	0	1	0	0	0	0	0	0	0	0	0	0	0	0	0	0	0	0	0	0	0	0	0	0	0	0	0	0	0
52832	0	0	0	0	0	0	0	0	0	0	0	0	0	0	0	0	0	0	0	0	0	0	0	0	0	0	0	0	0	0	0	0	0	0	0	0	0	0	0	0	0	0	0	0	0	0	0	0	0
52878	0	0	0	68	175	172	299	135	112	0	0	0	15	0	0	0	0	0	0	0	0	0	0	0	0	0	0	0	0	0	0	0	0	0	0	0	0	0	0	0	0	0	0	0	0	0	0	0	0
52880	0	0	0	0	0	0	0	0	0	0	0	0	1	0	0	35	42	1	2	2	0	0	4	2	12	3	4	2	4	0	0	0	0	0	0	0	1	0	0	0	0	0	0	0	0	0	0	0	0
52893	0	0	0	4	3	4	1	0	0	0	0	0	0	0	0	0	39	0	0	0	3	17	0	0	1	0	0	4	1	0	0	0	0	0	0	0	0	2	0	0	0	1	1	0	0	2	0	1	2
52910	0	1	0	4	0	0	0	0	0	0	0	0	0	6	7	0	0	12	30	0	0	0	4	0	0	0	0	0	0	0	0	0	0	0	0	0	0	0	0	0	0	0	0	0	0	0	0	0	0
52913	0	0	0	0	0	0	0	0	0	2	0	0	0	0	0	0	0	0	0	0	0	0	0	0	0	0	0	0	0	0	0	0	0	0	6	1	4	0	0	35	14	0	0	0	1	1	0	0	0
52929	1	0	0	4	0	0	0	0	1	6	10	0	0	4	36	0	0	23	108	0	0	0	117	1	0	0	0	0	0	3	0	3	0	1	0	0	0	0	0	0	0	163	101	241	0	0	0	0	1
52935	0	0	0	0	0	0	0	0	0	0	0	0	0	0	0	1	0	6	2	1	8	216	5	82	0	1	3	24	3	0	0	0	0	0	0	0	0	0	0	0	0	0	0	0	8	2	7	2	0
52949	0	0	0	0	0	0	0	0	0	0	0	0	0	0	0	0	3	19	0	0	0	8	0	0	0	0	0	0	3	0	0	0	0	0	0	0	0	0	0	0	0	0	0	0	0	0	0	0	0
53010	0	0	0	0	0	0	0	0	0	0	0	0	0	0	0	0	0	0	0	0	0	5	2	2	1	10	0	2	0	0	0	0	0	0	0	0	0	0	0	0	0	0	0	0	0	0	0	0	0
53013	0	0	0	0	0	0	0	0	0	0	0	0	0	0	0	2	9	0	1	0	1	0	3	1	2	0	1	9	2	0	0	0	0	0	0	0	0	0	0	0	0	0	0	0	0	0	0	1	0
53019	1	0	0	1	3	29	68	1	7	0	0	0	5	2	0	0	0	0	0	0	0	0	0	0	0	0	0	0	0	0	0	0	0	0	8	0	10	0	1	0	0	0	0	0	0	0	0	0	0
53031	0	0	0	0	0	0	0	0	0	0	0	0	0	0	0	4	0	0	22	13	1	0	0	10	0	0	0	0	0	0	0	0	0	0	0	0	0	0	0	0	0	0	0	0	0	0	0	0	0
53145	0	0	0	0	0	0	0	0	0	0	0	0	0	0	0	0	0	10	3	0	17	164	0	0	0	0	0	0	0	0	0	0	0	0	0	0	0	0	0	0	0	0	0	0	0	0	0	0	0
53232	0	0	0	0	48	8	22	0	9	0	0	0	7	0	0	0	0	0	0	0	0	0	0	0	0	0	0	0	0	0	0	0	0	0	0	0	0	0	0	0	0	0	0	0	0	0	0	0	0
53285	0	0	0	0	0	0	0	0	0	0	0	0	0	0	0	0	0	0	0	0	0	0	0	0	0	0	0	0	0	0	0	0	0	0	0	0	0	0	0	0	0	0	0	0	0	0	0	0	0
53286	0	1	0	3	2	24	5	0	0	0	0	0	16	1	0	0	0	0	0	0	0	0	0	0	0	0	0	0	0	0	0	1	1	0	0	0	0	0	0	0	0	0	0	0	1	0	0	1	0
53290	0	0	0	1	29	1	31	1	3	0	0	0	0	0	0	0	0	0	0	0	0	0	0	0	0	0	0	0	0	0	0	0	0	0	0	0	0	0	0	0	0	0	0	0	0	0	0	0	0
53318	0	0	0	0	3	0	0	0	6	0	0	0	139	1	0	0	0	0	0	0	0	0	0	0	0	0	0	0	0	0	0	0	0	0	0	0	0	0	0	0	0	0	0	1	2	2	0	2	0
53328	0	0	0	0	0	0	0	0	0	0	0	0	0	0	0	9	0	4	19	0	3	2	3	3	0	0	0	0	0	0	0	0	0	0	0	0	0	0	0	0	0	0	0	0	0	0	0	0	0
53339	0	0	0	0	0	0	0	0	0	0	0	0	0	0	0	0	0	0	0	0	0	0	0	0	0	0	0	0	0	0	0	0	0	0	0	0	0	0	0	0	0	0	0	0	0	0	0	0	0
53374	2	2	1	27	45	103	72	8	15	0	0	0	0	0	1	0	0	0	0	0	0	0	0	0	0	0	0	0	0	0	0	0	0	0	0	0	0	0	0	0	0	0	0	0	0	0	0	0	0
[truncated: 393 more rows]
[truncated: 37 more columns]
